# Supplementary material
Source: MDPI journal article supplement (https://www.mdpi.com/2073-8994/15/9/1804)
Supplement: s1 [file s1]

# 1 Regular sp p-cages

|                                                                                                                  |                                                                                                                 |                                                                                                                   |
|------------------------------------------------------------------------------------------------------------------|-----------------------------------------------------------------------------------------------------------------|-------------------------------------------------------------------------------------------------------------------|
| 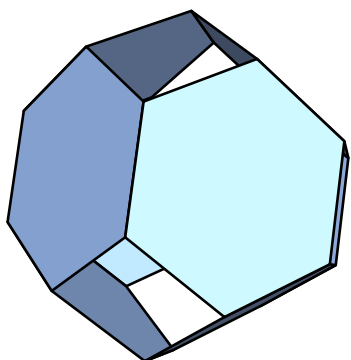 <p>sp_P6_P6_1_1_1-1_1_1</p>    |  <p>sp_P6_P9_1_1_1-2_2_2</p>   |  <p>sp_P6_P12_1_1_1-3_3_3</p>  |
|  <p>sp_P6_P15_1_1_1-4_4_4</p> |  <p>sp_P7_P7_1_1_2-1_1_2</p> |  <p>sp_P8_P8_1_1_3-1_1_3</p> |

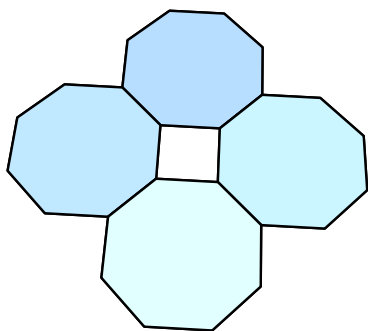

sp\_P8\_P8\_1\_2\_2-1\_2\_2

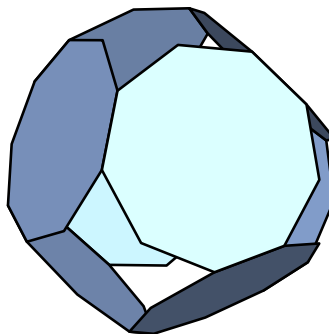

sp\_P9\_P9\_2\_2\_2-2\_2\_2

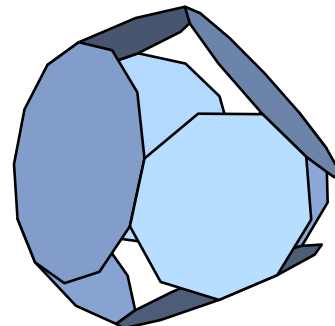

sp\_P9\_P12\_2\_2\_2-3\_3\_3

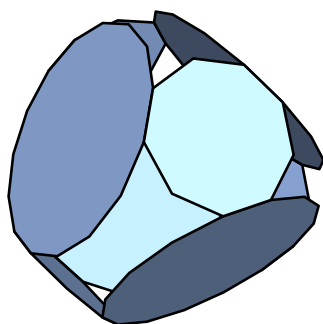

sp\_P9\_P15\_2\_2\_2-4\_4\_4

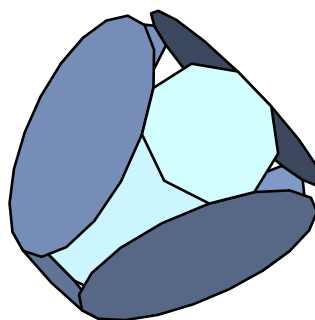

sp\_P9\_P18\_2\_2\_2-5\_5\_5

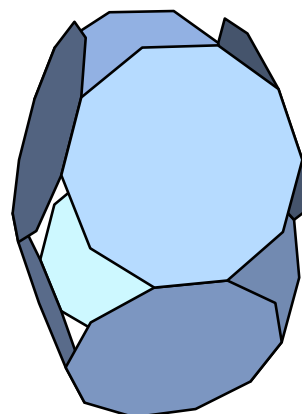

sp\_P10\_P10\_2\_2\_3-2\_2\_3

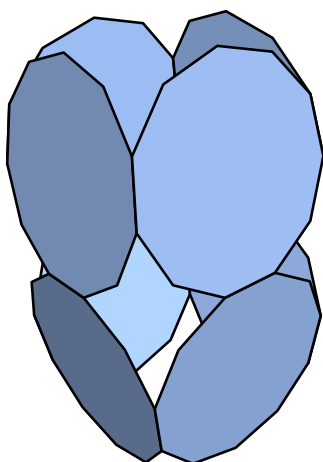

sp\_P11\_P11\_2\_2\_4-2\_2\_4

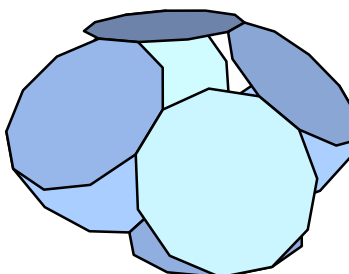

sp\_P11\_P11\_2\_3\_3-2\_3\_3

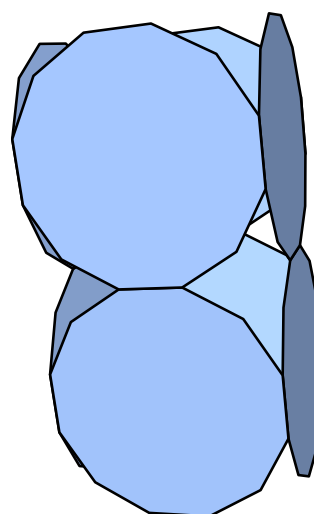

sp\_P12\_P12\_2\_2\_5-2\_2\_5

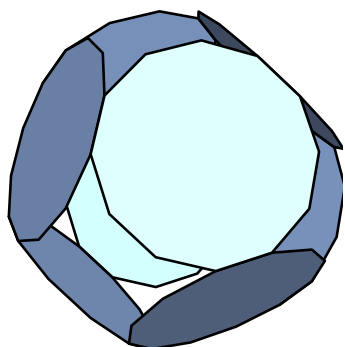

sp\_P12\_P12\_3\_3\_3-3\_3\_3

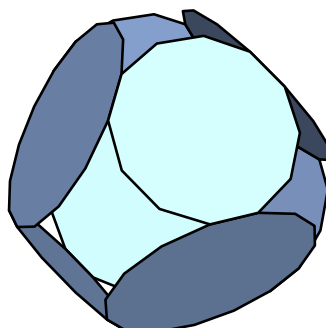

sp\_P12\_P15\_3\_3\_3-4\_4\_4

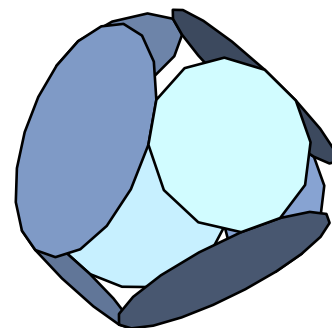

sp\_P12\_P18\_3\_3\_3-5\_5\_5

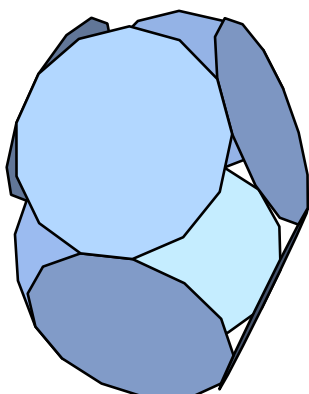

sp\_P13\_P13\_3\_3\_4-3\_3\_4

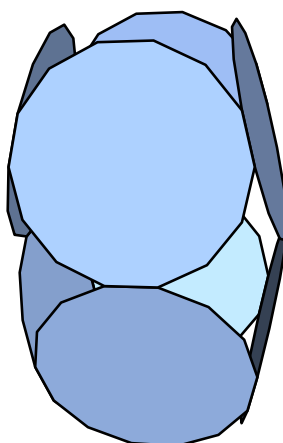

sp\_P14\_P14\_3\_3\_5-3\_3\_5

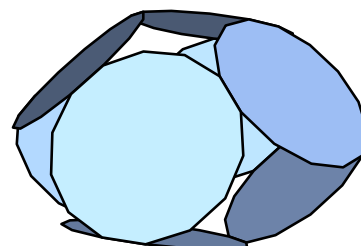

sp\_P14\_P14\_3\_4\_4-3\_4\_4

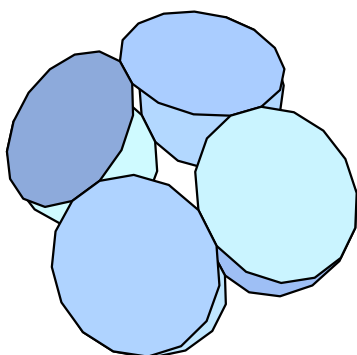

sp\_P15\_P15\_3\_4\_5-3\_4\_5

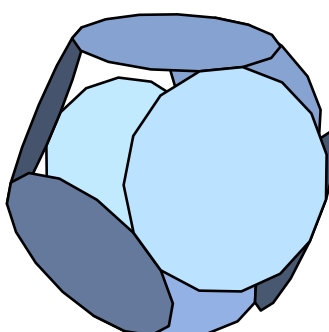

sp\_P15\_P15\_4\_4\_4-4\_4\_4

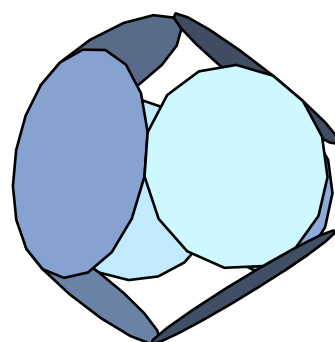

sp\_P15\_P18\_4\_4\_4-5\_5\_5

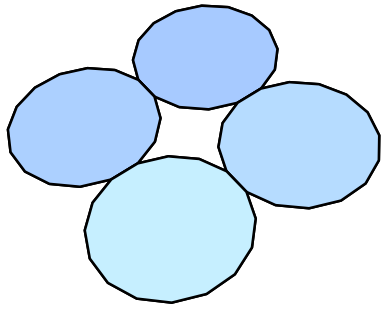

sp\_P16\_P16\_3\_5\_5-3\_5\_5

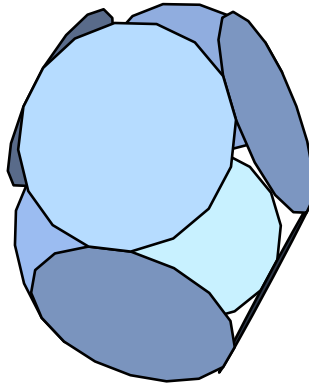

sp\_P16\_P16\_4\_4\_5-4\_4\_5

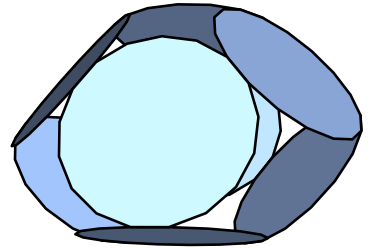

sp\_P17\_P17\_4\_5\_5-4\_5\_5

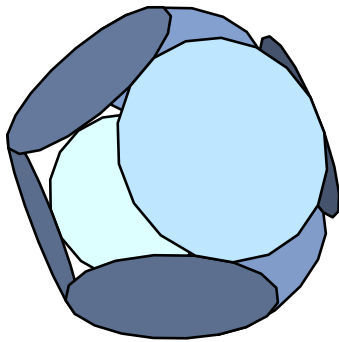

sp\_P18\_P18\_5\_5\_5-5\_5\_5

## 2 Regular Ato p-cages

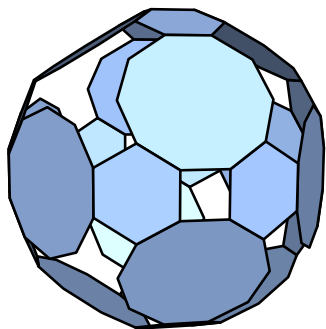

Ato\_P6\_P10\_1\_1\_1-1\_3\_3

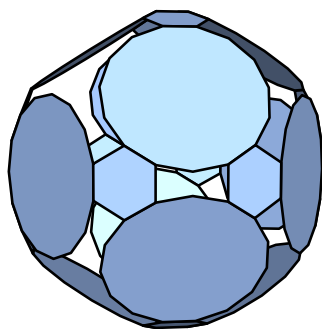

Ato\_P6\_P15\_1\_1\_1-2\_5\_5

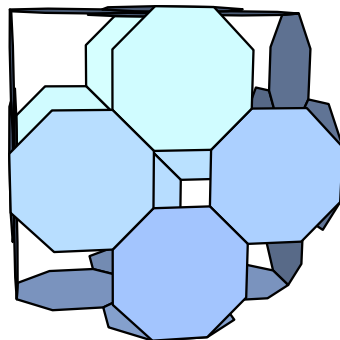

Ato\_P8\_P8\_1\_2\_2-1\_2\_2

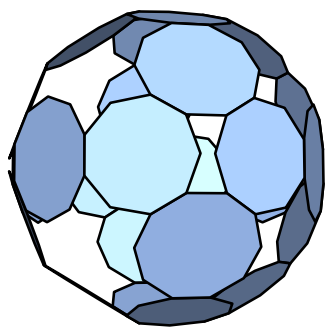

Ato\_P9\_P10\_2\_2\_2-1\_3\_3

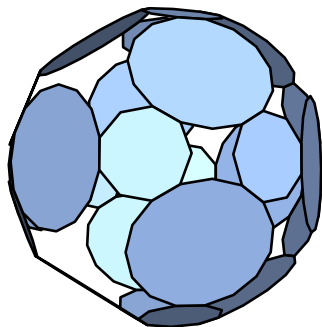

Ato\_P9\_P15\_2\_2\_2-2\_5\_5

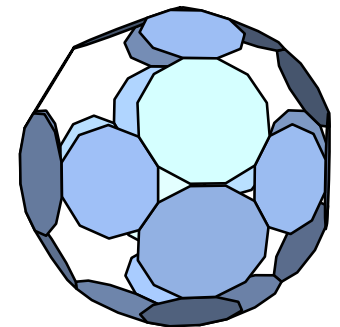

Ato\_P10\_P12\_1\_3\_3-3\_3\_3

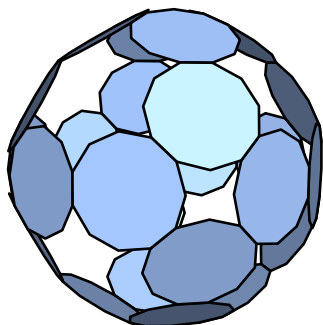

Ato\_P11\_P11\_2\_3\_3-2\_3\_3

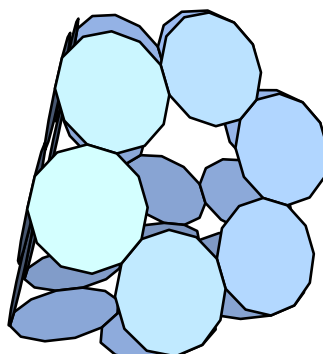

Ato\_P12\_P12\_2\_4\_3-2\_4\_3

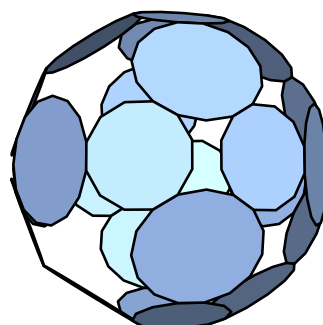

Ato\_P12\_P15\_3\_3\_3-2\_5\_5

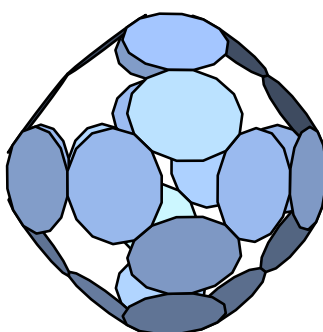

Ato\_P14\_P14\_3\_4\_4-3\_4\_4

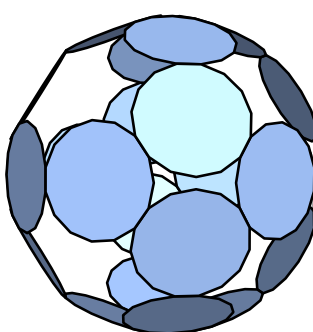

Ato\_P15\_P15\_2\_5\_5-4\_4\_4

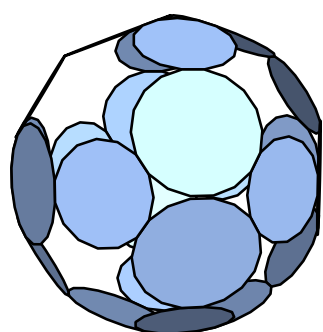

Ato\_P15\_P18\_2\_5\_5-5\_5\_5

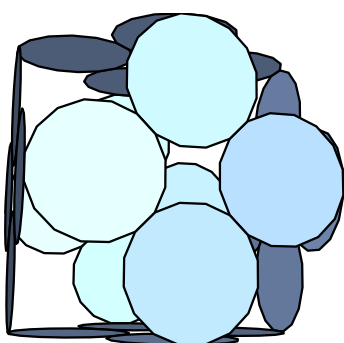

Ato\_P16\_P16\_3\_5\_5-3\_5\_5

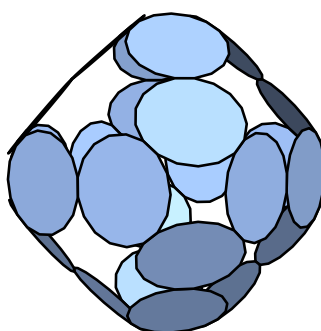

Ato\_P17\_P17\_4\_5\_5-4\_5\_5

### 3 Regular Atco p-cages

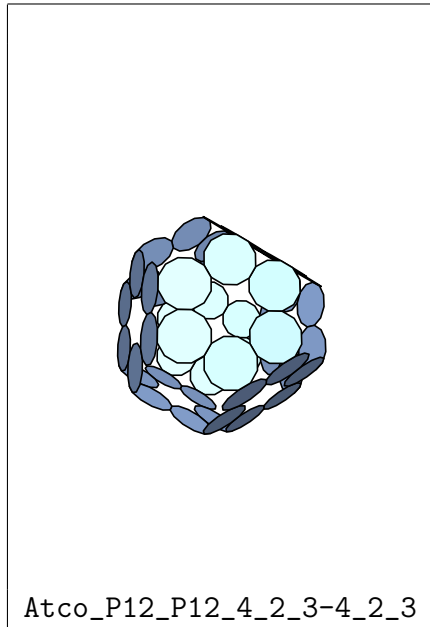

### 4 Regular DArD p-cages

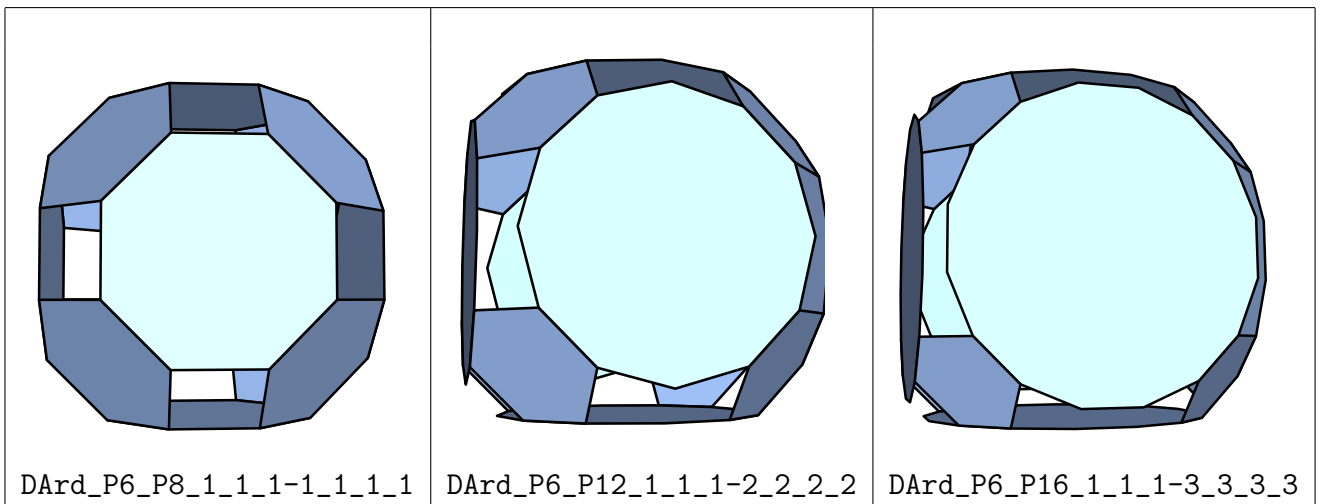

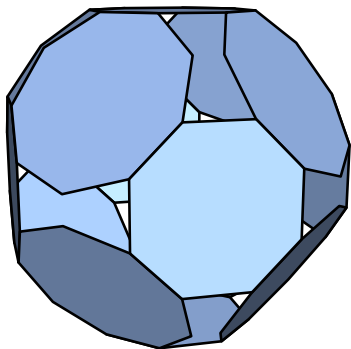

DArd\_P9\_P8\_2\_2\_2-1\_1\_1\_1

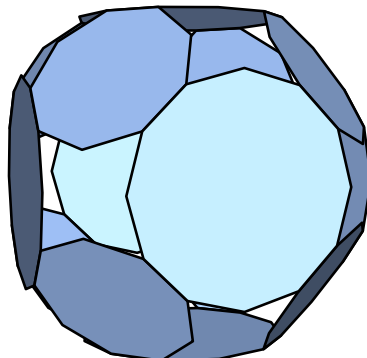

DArd\_P9\_P12\_2\_2\_2-2\_2\_2\_2

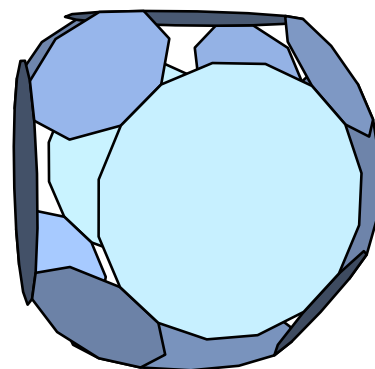

DArd\_P9\_P16\_2\_2\_2-3\_3\_3\_3

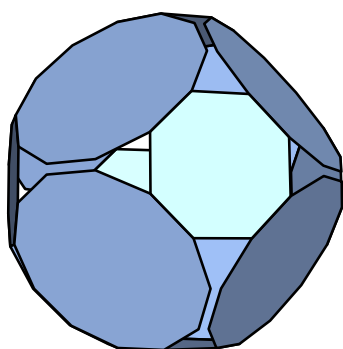

DArd\_P12\_P8\_3\_3\_3-1\_1\_1\_1

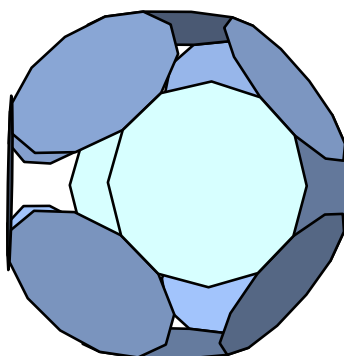

DArd\_P12\_P12\_3\_3\_3-2\_2\_2\_2

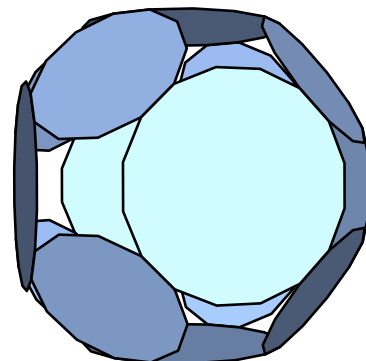

DArd\_P12\_P16\_3\_3\_3-3\_3\_3\_3

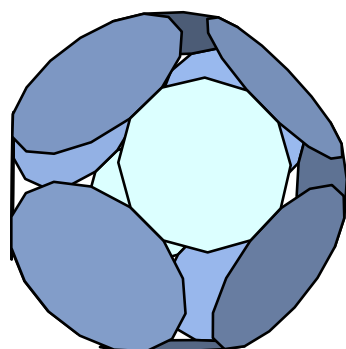

DArd\_P15\_P12\_4\_4\_4-2\_2\_2\_2

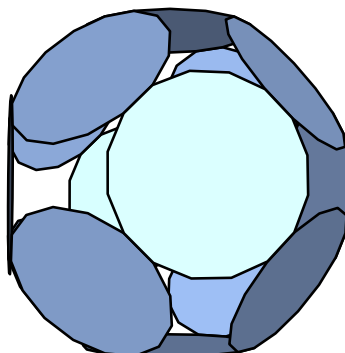

DArd\_P15\_P16\_4\_4\_4-3\_3\_3\_3

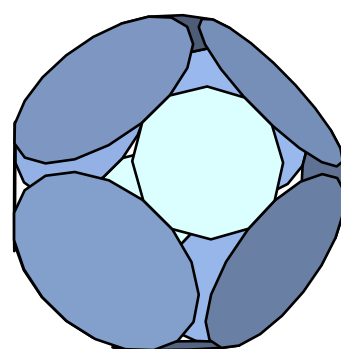

DArd\_P18\_P12\_5\_5\_5-2\_2\_2\_2



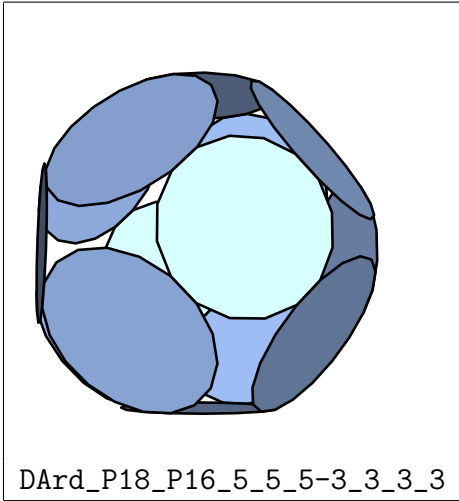

## 5 Regular DArt p-cages

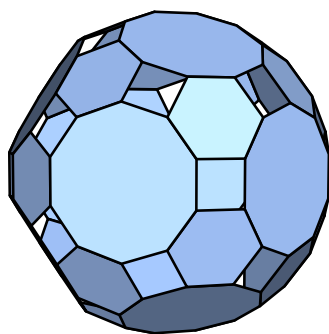

DArt\_P6\_P10\_1\_1\_1-1\_1\_1\_1\_1

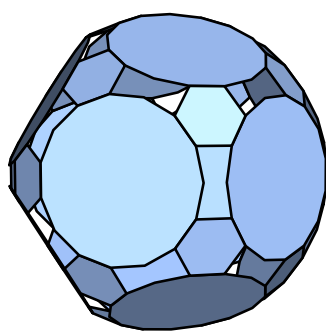

DArt\_P6\_P15\_1\_1\_1-2\_2\_2\_2\_2

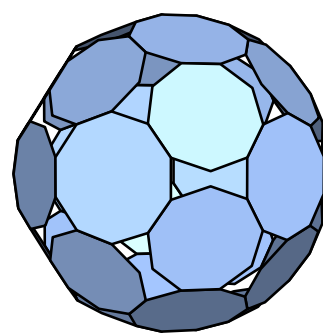

DArt\_P9\_P10\_2\_2\_2-1\_1\_1\_1\_1

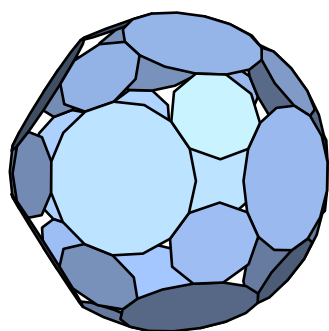

DArt\_P9\_P15\_2\_2\_2-2\_2\_2\_2\_2

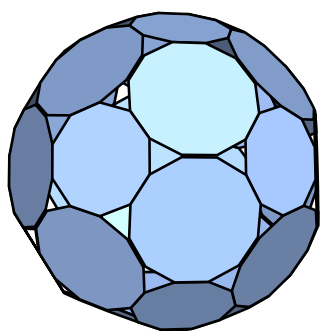

DArt\_P12\_P10\_3\_3\_3-1\_1\_1\_1\_1

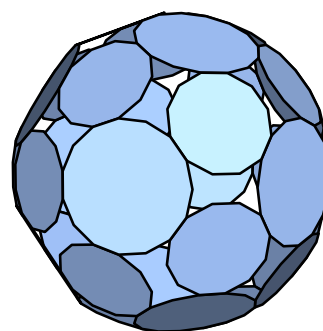

DArt\_P12\_P15\_3\_3\_3-2\_2\_2\_2\_2

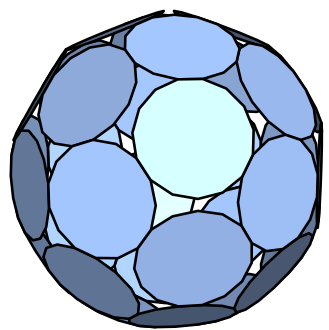

DArt\_P15\_P15\_4\_4\_4-2\_2\_2\_2\_2

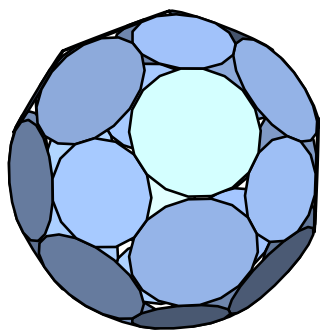

DArt\_P18\_P15\_5\_5\_5-2\_2\_2\_2\_2

| name                   | $\theta$   | $R/\rho$ |
|------------------------|------------|----------|
| sp_P6_P6_1_1_1-1-1-1   | 54.735610° | 1.000000 |
| sp_P7_P7_1_1_2-1-1-2   | 76.806320° | 0.924139 |
| sp_P8_P8_1_1_3-1-1-3   | 90.000000° | 0.923880 |
| sp_P8_P8_1_2_2-1-2-2   | 0.000001°  | 1.306563 |
| sp_P9_P9_2_2_2-2-2-2   | 54.735610° | 1.085064 |
| sp_P10_P10_2_2_3-2-2-3 | 71.039290° | 1.000000 |
| sp_P11_P11_2_2_4-2-2-4 | 81.733461° | 0.969360 |
| sp_P11_P11_2_3_3-2-3-3 | 29.945004° | 1.269591 |
| sp_P12_P12_2_2_5-2-2-5 | 90.000000° | 0.965926 |
| sp_P12_P12_3_3_3-3-3-3 | 54.735610° | 1.115355 |
| sp_P13_P13_3_3_4-3-3-4 | 67.712768° | 1.038422 |
| sp_P14_P14_3_3_5-3-3-5 | 76.806320° | 1.000000 |
| sp_P14_P14_3_4_4-3-4-4 | 37.110498° | 1.246980 |
| sp_P15_P15_4_4_4-4-4-4 | 54.735610° | 1.129468 |
| sp_P16_P16_4_4_5-4-4-5 | 65.530199° | 1.061594 |
| sp_P16_P16_3_5_5-3-5-5 | 0.000002°  | 1.387040 |
| sp_P17_P17_4_5_5-4-5-5 | 40.960216° | 1.231769 |
| sp_P18_P18_5_5_5-5-5-5 | 54.735610° | 1.137158 |

Table 1: Characteristics of regular sp p-cages with  $\mathbf{b=c}$ .
