# Supplementary material
Source: MDPI journal article supplement (https://www.mdpi.com/2073-8994/15/9/1804)
Supplement: s1 [file s1]

# 1 Best sp p-cages $\Delta < 0.1$

|                                                                                                                                                                                          |                                                                                                                                                                                          |                                                                                                                                                                                           |
|------------------------------------------------------------------------------------------------------------------------------------------------------------------------------------------|------------------------------------------------------------------------------------------------------------------------------------------------------------------------------------------|-------------------------------------------------------------------------------------------------------------------------------------------------------------------------------------------|
| 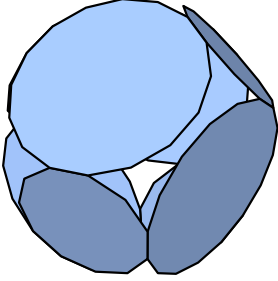 <p> <math>\Delta_l = 0.00007</math> <math>\Delta_a = 0.00007</math><br/> sp_P11_P16_2_3_3-5_4_4 </p>   |  <p> <math>\Delta_l = 0.00022</math> <math>\Delta_a = 0.00022</math><br/> sp_P14_P16_3_4_4-5_4_4 </p>   |  <p> <math>\Delta_l = 0.00031</math> <math>\Delta_a = 0.00031</math><br/> sp_P13_P17_2_4_4-4_5_5 </p>   |
|  <p> <math>\Delta_l = 0.00052</math> <math>\Delta_a = 0.00052</math><br/> sp_P11_P13_2_3_3-4_3_3 </p>  |  <p> <math>\Delta_l = 0.00090</math> <math>\Delta_a = 0.00090</math><br/> sp_P16_P17_4_4_5-5_5_4 </p>  |  <p> <math>\Delta_l = 0.00142</math> <math>\Delta_a = 0.00142</math><br/> sp_P17_P18_4_5_5-5_5_5 </p> |
|  <p> <math>\Delta_l = 0.00148</math> <math>\Delta_a = 0.00148</math><br/> sp_P15_P16_4_4_4-4_4_5 </p> |  <p> <math>\Delta_l = 0.00150</math> <math>\Delta_a = 0.00150</math><br/> sp_P14_P18_3_4_4-5_5_5 </p> |  <p> <math>\Delta_l = 0.00155</math> <math>\Delta_a = 0.00155</math><br/> sp_P8_P10_1_2_2-3_2_2 </p> |

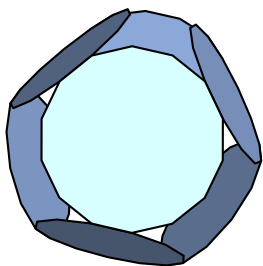

$\Delta_l = 0.00200 \Delta_a = 0.00200$   
sp\_P13\_P14\_3\_3\_4-4\_4\_3

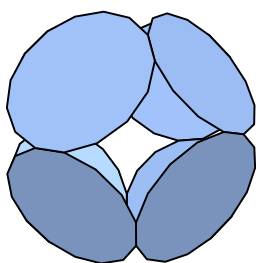

$\Delta_l = 0.00258 \Delta_a = 0.00259$   
sp\_P14\_P15\_3\_4\_4-4\_4\_4

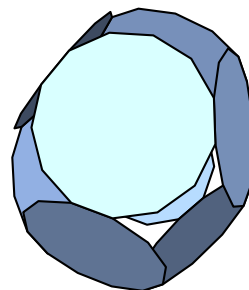

$\Delta_l = 0.00270 \Delta_a = 0.00270$   
sp\_P12\_P13\_3\_3\_3-3\_3\_4

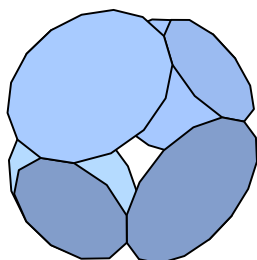

$\Delta_l = 0.00272 \Delta_a = 0.00272$   
sp\_P11\_P15\_2\_3\_3-4\_4\_4

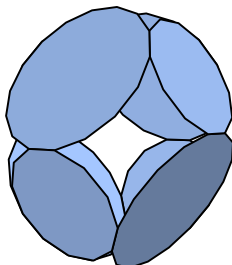

$\Delta_l = 0.00296 \Delta_a = 0.00296$   
sp\_P12\_P16\_3\_3\_3-4\_4\_5

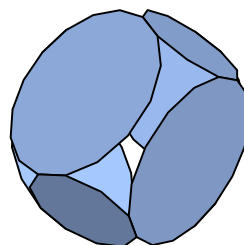

$\Delta_l = 0.00379 \Delta_a = 0.00379$   
sp\_P10\_P16\_2\_2\_3-5\_5\_3

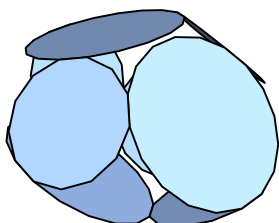

$\Delta_l = 0.00409 \Delta_a = 0.00409$   
sp\_P13\_P18\_2\_4\_4-5\_5\_5

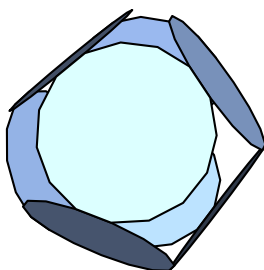

$\Delta_l = 0.00419 \Delta_a = 0.00419$   
sp\_P15\_P15\_3\_4\_5-5\_4\_3

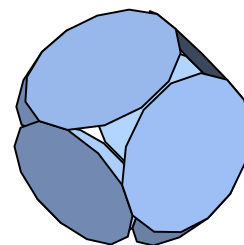

$\Delta_l = 0.00425 \Delta_a = 0.00425$   
sp\_P13\_P14\_2\_4\_4-5\_3\_3

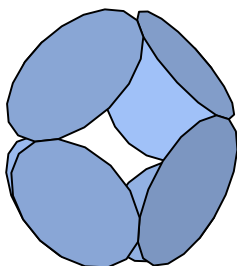

$\Delta_l = 0.00476 \Delta_a = 0.00477$   
sp\_P16\_P18\_4\_4\_5-5\_5\_5

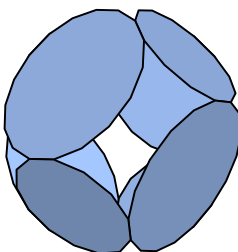

$\Delta_l = 0.00504 \Delta_a = 0.00504$   
sp\_P13\_P17\_3\_3\_4-5\_5\_4

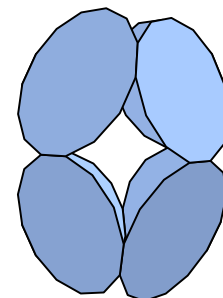

$\Delta_l = 0.00506 \Delta_a = 0.00507$   
sp\_P13\_P14\_3\_3\_4-3\_3\_5

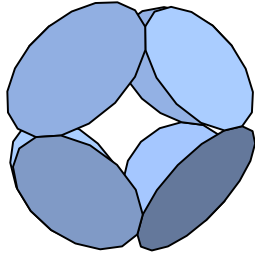

$\Delta_l = 0.00508 \Delta_a = 0.00508$   
sp\_P15\_P17\_4\_4\_4-4\_5\_5

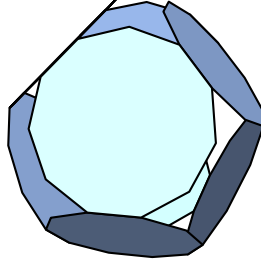

$\Delta_l = 0.00531 \Delta_a = 0.00531$   
sp\_P10\_P11\_2\_2\_3-3\_3\_2

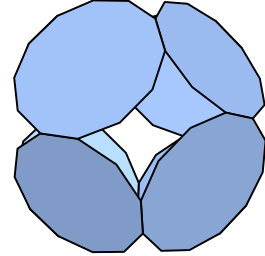

$\Delta_l = 0.00538 \Delta_a = 0.00538$   
sp\_P11\_P12\_2\_3\_3-3\_3\_3

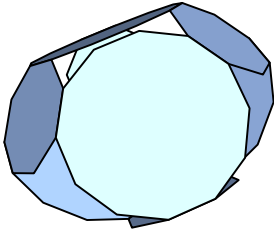

$\Delta_l = 0.00559 \Delta_a = 0.00559$   
sp\_P8\_P12\_1\_2\_2-3\_3\_3

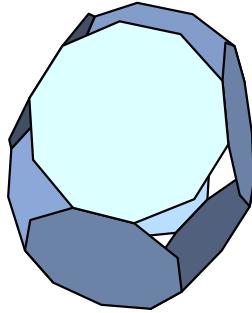

$\Delta_l = 0.00563 \Delta_a = 0.00563$   
sp\_P9\_P10\_2\_2\_2-2\_2\_3

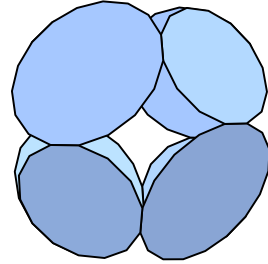

$\Delta_l = 0.00634 \Delta_a = 0.00634$   
sp\_P14\_P17\_3\_4\_4-4\_5\_5

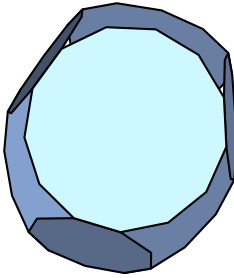

$\Delta_l = 0.00636 \Delta_a = 0.00637$   
sp\_P9\_P13\_2\_2\_2-3\_3\_4

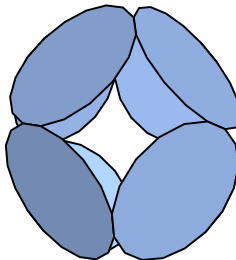

$\Delta_l = 0.00665 \Delta_a = 0.00665$   
sp\_P17\_P17\_4\_5\_5-5\_4\_5

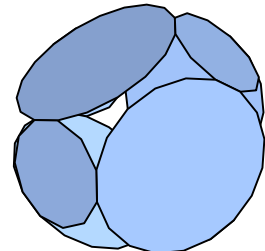

$\Delta_l = 0.00667 \Delta_a = 0.00668$   
sp\_P11\_P18\_2\_3\_3-5\_5\_5

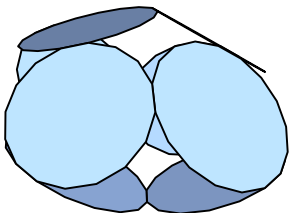

$\Delta_l = 0.00707 \Delta_a = 0.00707$   
sp\_P16\_P17\_3\_5\_5-4\_5\_5

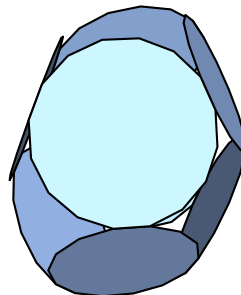

$\Delta_l = 0.00764 \Delta_a = 0.00764$   
sp\_P14\_P16\_3\_4\_4-4\_4\_5

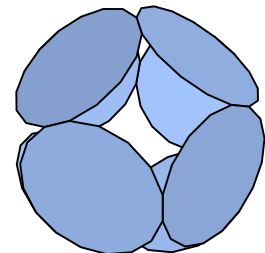

$\Delta_l = 0.00802 \Delta_a = 0.00803$   
sp\_P16\_P16\_4\_4\_5-4\_5\_4

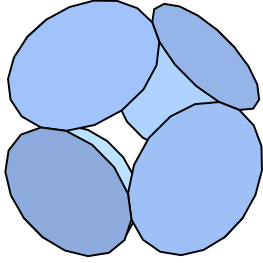

$\Delta_l = 0.00808 \Delta_a = 0.00808$   
sp\_P16\_P18\_3\_5\_5-5\_5\_5

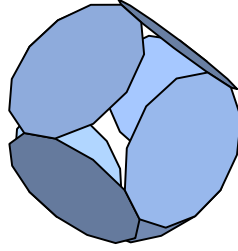

$\Delta_l = 0.00812 \Delta_a = 0.00814$   
sp\_P12\_P12\_2\_3\_4-4\_3\_2

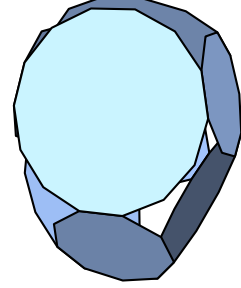

$\Delta_l = 0.00829 \Delta_a = 0.00829$   
sp\_P9\_P14\_2\_2\_2-3\_3\_5

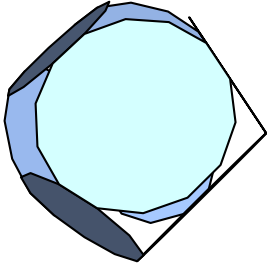

$\Delta_l = 0.00832 \Delta_a = 0.00834$   
sp\_P11\_P14\_2\_3\_3-5\_3\_3

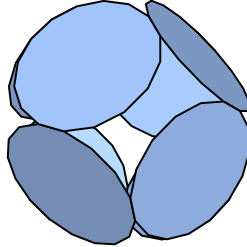

$\Delta_l = 0.00835 \Delta_a = 0.00835$   
sp\_P16\_P16\_3\_5\_5-5\_4\_4

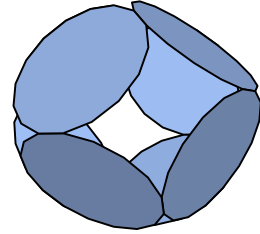

$\Delta_l = 0.00835 \Delta_a = 0.00835$   
sp\_P16\_P16\_4\_4\_5-5\_5\_3

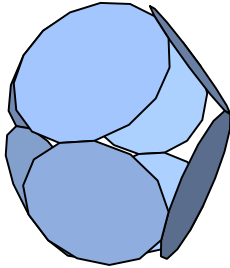

$\Delta_l = 0.00869 \Delta_a = 0.00870$   
sp\_P13\_P15\_3\_3\_4-4\_4\_4

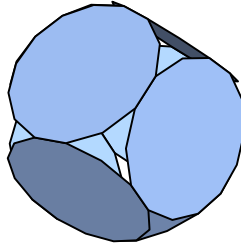

$\Delta_l = 0.00519 \Delta_a = 0.00886$   
sp\_P14\_P14\_2\_4\_5-5\_4\_2

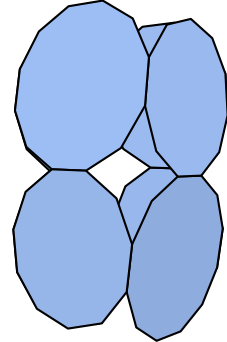

$\Delta_l = 0.00895 \Delta_a = 0.00895$   
sp\_P11\_P12\_2\_2\_4-2\_2\_5

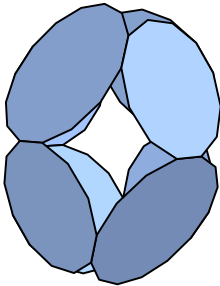

$\Delta_l = 0.00895 \Delta_a = 0.00896$   
sp\_P12\_P14\_3\_3\_3-3\_3\_5

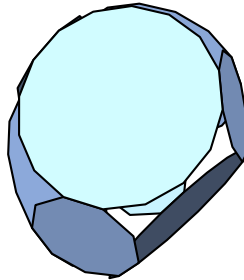

$\Delta_l = 0.00896 \Delta_a = 0.00898$   
sp\_P9\_P16\_2\_2\_2-4\_4\_5

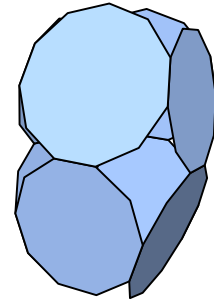

$\Delta_l = 0.00904 \Delta_a = 0.00904$   
sp\_P10\_P11\_2\_2\_3-2\_2\_4

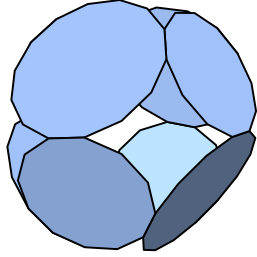

$\Delta_l = 0.00928 \Delta_a = 0.00929$   
sp\_P12\_P14\_3\_3\_3-3\_4\_4

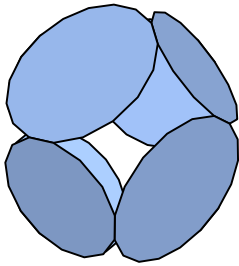

$\Delta_l = 0.00967 \Delta_a = 0.00967$   
sp\_P14\_P17\_3\_4\_4-5\_4\_5

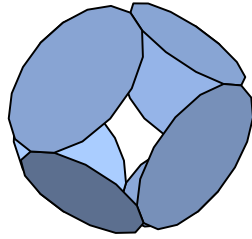

$\Delta_l = 0.00950 \Delta_a = 0.00952$   
sp\_P13\_P16\_3\_3\_4-5\_5\_3

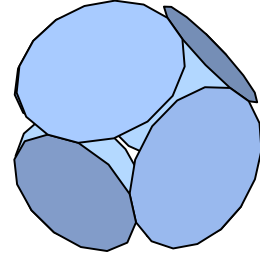

$\Delta_l = 0.00956 \Delta_a = 0.00959$   
sp\_P13\_P16\_2\_4\_4-5\_4\_4

## 2 Best Ato p-cages $\Delta < 0.1$

|                                                                                                                                                                              |                                                                                                                                                                              |                                                                                                                                                                                |
|------------------------------------------------------------------------------------------------------------------------------------------------------------------------------|------------------------------------------------------------------------------------------------------------------------------------------------------------------------------|--------------------------------------------------------------------------------------------------------------------------------------------------------------------------------|
| 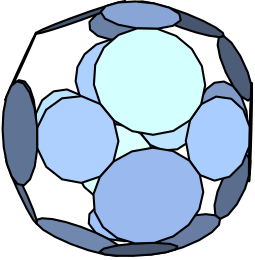 <p> <math>\Delta_l = 0.00007 \Delta_a = 0.00007</math><br/> Ato_P13_P17_2_4_4-4_5_5 </p>   |  <p> <math>\Delta_l = 0.00013 \Delta_a = 0.00013</math><br/> Ato_P16_P16_3_5_5-3_5_5 </p>   |  <p> <math>\Delta_l = 0.00015 \Delta_a = 0.00015</math><br/> Ato_P8_P8_1_2_2-1_2_2 </p>     |
|  <p> <math>\Delta_l = 0.00017 \Delta_a = 0.00017</math><br/> Ato_P14_P16_3_4_4-3_5_5 </p>  |  <p> <math>\Delta_l = 0.00031 \Delta_a = 0.00031</math><br/> Ato_P15_P15_3_5_4-3_5_4 </p>  |  <p> <math>\Delta_l = 0.00031 \Delta_a = 0.00031</math><br/> Ato_P8_P14_1_2_2-3_4_4 </p>   |
|  <p> <math>\Delta_l = 0.00110 \Delta_a = 0.00110</math><br/> Ato_P15_P15_3_4_5-3_5_4 </p> |  <p> <math>\Delta_l = 0.00143 \Delta_a = 0.00143</math><br/> Ato_P16_P17_3_5_5-4_5_5 </p> |  <p> <math>\Delta_l = 0.00310 \Delta_a = 0.00310</math><br/> Ato_P13_P18_2_4_4-5_5_5 </p> |

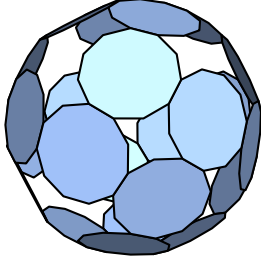

$\Delta_l = 0.00373 \Delta_a = 0.00373$   
Ato\_P11\_P11\_2\_2\_4-2\_4\_2

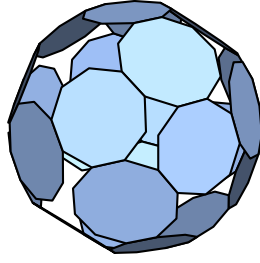

$\Delta_l = 0.00494 \Delta_a = 0.00494$   
Ato\_P9\_P10\_2\_3\_1-1\_2\_4

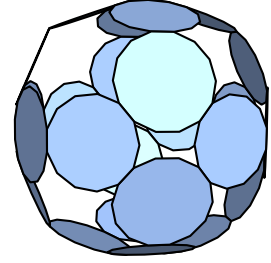

$\Delta_l = 0.00542 \Delta_a = 0.00542$   
Ato\_P13\_P14\_2\_4\_4-3\_4\_4

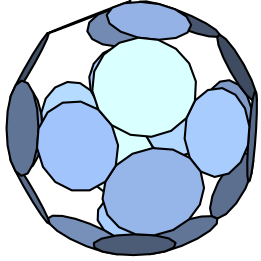

$\Delta_l = 0.00560 \Delta_a = 0.00560$   
Ato\_P14\_P16\_2\_4\_5-4\_5\_4

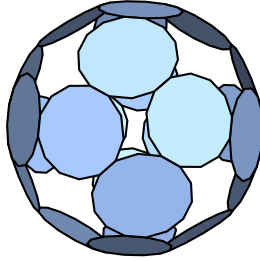

$\Delta_l = 0.00671 \Delta_a = 0.00671$   
Ato\_P13\_P14\_3\_3\_4-2\_5\_4

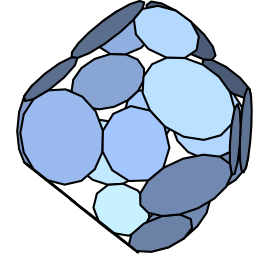

$\Delta_l = 0.00673 \Delta_a = 0.00673$   
Ato\_P11\_P15\_2\_3\_3-4\_4\_4

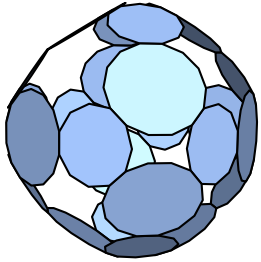

$\Delta_l = 0.00695 \Delta_a = 0.00695$   
Ato\_P11\_P14\_2\_3\_3-3\_4\_4

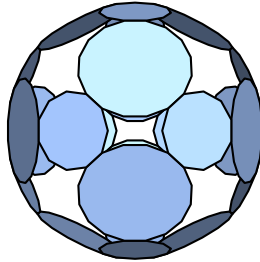

$\Delta_l = 0.00716 \Delta_a = 0.00717$   
Ato\_P11\_P16\_2\_3\_3-3\_5\_5

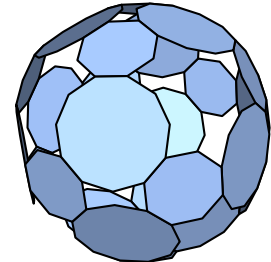

$\Delta_l = 0.00734 \Delta_a = 0.00734$   
Ato\_P8\_P11\_1\_2\_2-2\_3\_3

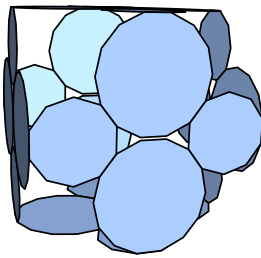

$\Delta_l = 0.00748 \Delta_a = 0.00748$   
Ato\_P10\_P14\_1\_3\_3-3\_4\_4

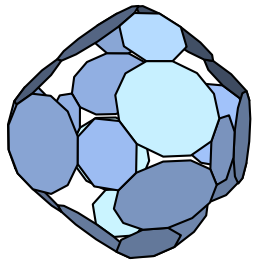

$\Delta_l = 0.00763 \Delta_a = 0.00764$   
Ato\_P8\_P12\_1\_2\_2-2\_3\_3\_3

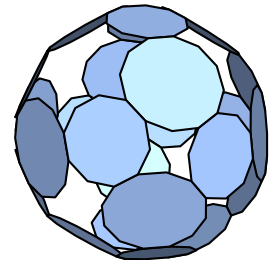

$\Delta_l = 0.00807 \Delta_a = 0.00807$   
Ato\_P10\_P12\_2\_3\_2-2\_3\_4

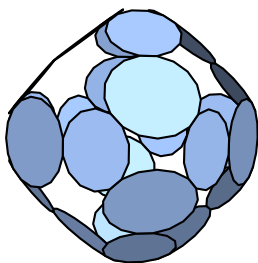

$\Delta_l = 0.00812 \Delta_a = 0.00812$   
Ato\_P14\_P17\_3\_4\_4-4\_5\_5

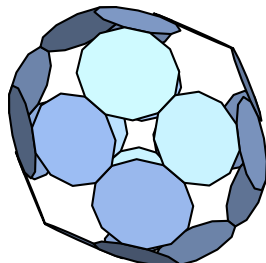

$\Delta_l = 0.00944 \Delta_a = 0.00944$   
Ato\_P11\_P12\_2\_3\_3-2\_4\_3

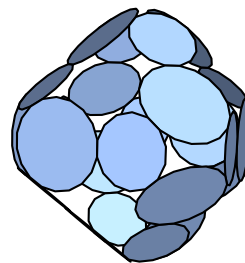

$\Delta_l = 0.00975 \Delta_a = 0.00977$   
Ato\_P14\_P18\_3\_4\_4-5\_5\_5



### 3 Best Atco p-cages $\Delta < 0.1$

|                                                                                                                                                                               |                                                                                                                                                                               |                                                                                                                                                                                 |
|-------------------------------------------------------------------------------------------------------------------------------------------------------------------------------|-------------------------------------------------------------------------------------------------------------------------------------------------------------------------------|---------------------------------------------------------------------------------------------------------------------------------------------------------------------------------|
| 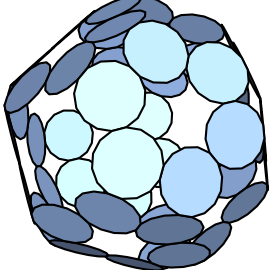 <p> <math>\Delta_l = 0.00131 \Delta_a = 0.00131</math><br/> Atco_P15_P15_5_3_4-5_3_4 </p>   |  <p> <math>\Delta_l = 0.00149 \Delta_a = 0.00149</math><br/> Atco_P11_P12_4_1_3-3_3_3 </p>   |  <p> <math>\Delta_l = 0.00159 \Delta_a = 0.00159</math><br/> Atco_P9_P11_2_2_2-4_1_3 </p>    |
|  <p> <math>\Delta_l = 0.00178 \Delta_a = 0.00178</math><br/> Atco_P6_P11_1_1_1-4_1_3 </p>   |  <p> <math>\Delta_l = 0.00331 \Delta_a = 0.00332</math><br/> Atco_P11_P12_4_2_2-3_2_4 </p>  |  <p> <math>\Delta_l = 0.00411 \Delta_a = 0.00410</math><br/> Atco_P15_P16_5_3_4-5_3_5 </p>  |
|  <p> <math>\Delta_l = 0.00435 \Delta_a = 0.00436</math><br/> Atco_P11_P12_3_2_3-4_2_3 </p> |  <p> <math>\Delta_l = 0.00742 \Delta_a = 0.00742</math><br/> Atco_P13_P15_4_3_3-5_2_5 </p> |  <p> <math>\Delta_l = 0.00811 \Delta_a = 0.00813</math><br/> Atco_P10_P15_3_2_2-5_2_5 </p> |

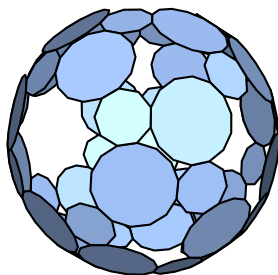

$\Delta_l = 0.00823 \Delta_a = 0.00823$   
Atco\_P9\_P14\_3\_1\_2-4\_3\_4

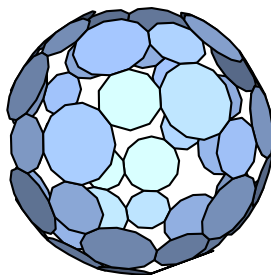

$\Delta_l = 0.00865 \Delta_a = 0.00865$   
Atco\_P10\_P13\_3\_2\_2-4\_2\_4

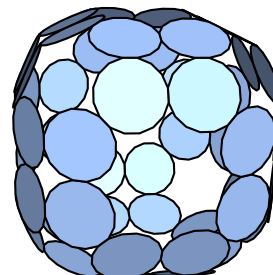

$\Delta_l = 0.00869 \Delta_a = 0.00870$   
Atco\_P16\_P16\_5\_3\_5-5\_3\_5

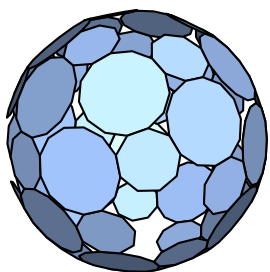

$\Delta_l = 0.00889 \Delta_a = 0.00890$   
Atco\_P9\_P13\_4\_1\_1-2\_3\_5

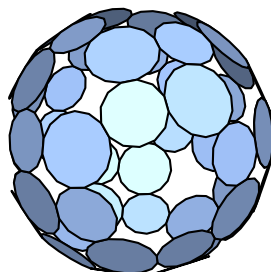

$\Delta_l = 0.00913 \Delta_a = 0.00916$   
Atco\_P13\_P15\_5\_2\_3-4\_3\_5

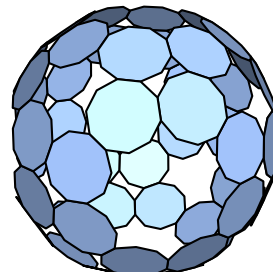

$\Delta_l = 0.00915 \Delta_a = 0.00916$   
Atco\_P10\_P10\_3\_1\_3-3\_2\_2

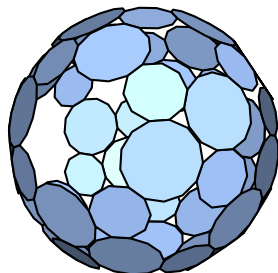

$\Delta_l = 0.00927 \Delta_a = 0.00929$   
Atco\_P10\_P13\_3\_1\_3-4\_3\_3

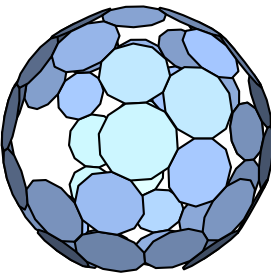

$\Delta_l = 0.00939 \Delta_a = 0.00940$   
Atco\_P11\_P12\_3\_1\_4-4\_3\_2

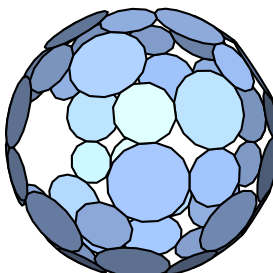

$\Delta_l = 0.00998 \Delta_a = 0.00998$   
Atco\_P12\_P16\_4\_2\_3-5\_3\_5

## 4 Best Atid p-cages $\Delta < 0.1$

|                                                                                                                                                                              |                                                                                                                                                                              |                                                                                                                                                                                 |
|------------------------------------------------------------------------------------------------------------------------------------------------------------------------------|------------------------------------------------------------------------------------------------------------------------------------------------------------------------------|---------------------------------------------------------------------------------------------------------------------------------------------------------------------------------|
| 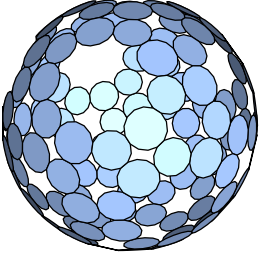 <p> <math>\Delta_l = 0.00474 \Delta_a = 0.00475</math><br/> Atid_P13_P14_4_4_2-5_3_3 </p>  |  <p> <math>\Delta_l = 0.00639 \Delta_a = 0.00639</math><br/> Atid_P10_P13_4_2_1-3_4_3 </p>  |  <p> <math>\Delta_l = 0.00646 \Delta_a = 0.00646</math><br/> Atid_P13_P14_5_3_2-4_4_3 </p>   |
|  <p> <math>\Delta_l = 0.00693 \Delta_a = 0.00692</math><br/> Atid_P7_P13_2_1_1-4_4_2 </p>  |  <p> <math>\Delta_l = 0.00759 \Delta_a = 0.00758</math><br/> Atid_P13_P14_4_3_3-5_4_2 </p> |  <p> <math>\Delta_l = 0.00823 \Delta_a = 0.00823</math><br/> Atid_P14_P15_5_3_3-5_5_2 </p>  |
|  <p> <math>\Delta_l = 0.00857 \Delta_a = 0.00859</math><br/> Atid_P9_P11_4_1_1-2_4_2 </p> |  <p> <math>\Delta_l = 0.00887 \Delta_a = 0.00886</math><br/> Atid_P9_P11_3_1_2-3_4_1 </p> |  <p> <math>\Delta_l = 0.00892 \Delta_a = 0.00892</math><br/> Atid_P12_P12_4_2_3-4_4_1 </p> |

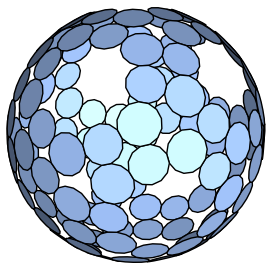

$$\Delta_l = 0.00925 \quad \Delta_a = 0.00927$$

Atid\_P13\_P14\_5\_2\_3-4\_5\_2

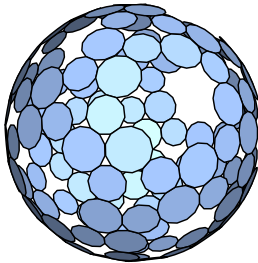

$$\Delta_l = 0.00989 \quad \Delta_a = 0.00990$$

Atid\_P11\_P13\_3\_4\_1-5\_2\_3
