# Supplementary material
Source: MDPI journal article supplement (https://www.mdpi.com/2073-8994/15/9/1804)
Supplement: s1 [file s1]

## 1 Regular sp P-cages

| name                   | name                   |
|------------------------|------------------------|
| sp_P6_P6_1_1_1-1_1_1   | sp_P6_P9_1_1_1-2_2_2   |
| sp_P6_P12_1_1_1-3_3_3  | sp_P6_P15_1_1_1-4_4_4  |
| sp_P7_P7_1_1_2-1_1_2   | sp_P8_P8_1_1_3-1_1_3   |
| sp_P8_P8_1_2_2-1_2_2   | sp_P9_P9_2_2_2-2_2_2   |
| sp_P9_P12_2_2_2-3_3_3  | sp_P9_P15_2_2_2-4_4_4  |
| sp_P9_P18_2_2_2-5_5_5  | sp_P10_P10_2_2_3-2_2_3 |
| sp_P11_P11_2_2_4-2_2_4 | sp_P11_P11_2_3_3-2_3_3 |
| sp_P12_P12_2_2_5-2_2_5 | sp_P12_P12_2_3_4-2_3_4 |
| sp_P12_P12_3_3_3-3_3_3 | sp_P12_P15_3_3_3-4_4_4 |
| sp_P12_P18_3_3_3-5_5_5 | sp_P13_P13_3_3_4-3_3_4 |
| sp_P14_P14_3_3_5-3_3_5 | sp_P14_P14_3_4_4-3_4_4 |
| sp_P15_P15_3_4_5-3_4_5 | sp_P15_P15_4_4_4-4_4_4 |
| sp_P15_P18_4_4_4-5_5_5 | sp_P16_P16_3_5_5-3_5_5 |
| sp_P16_P16_4_4_5-4_4_5 | sp_P17_P17_4_5_5-4_5_5 |
| sp_P18_P18_5_5_5-5_5_5 |                        |

## 2 Near Miss sp P-cages

| name                   | $\Delta_l$              | $\Delta_a$               | $c_l$    | $c_a$   |
|------------------------|-------------------------|--------------------------|----------|---------|
| sp_P11_P16_2_3_3-5_4_4 | $6.5165 \times 10^{-5}$ | $6.53817 \times 10^{-5}$ | 0.230669 | 1.76933 |
| sp_P14_P16_3_4_4-5_4_4 | 0.000218629             | 0.000218832              | 0.188191 | 1.81181 |
| sp_P13_P17_2_4_4-4_5_5 | 0.000312873             | 0.000313755              | 0.386106 | 1.61389 |
| sp_P11_P13_2_3_3-4_3_3 | 0.00051819              | 0.000518457              | 0.205304 | 1.7947  |
| sp_P16_P17_4_4_5-5_5_4 | 0.000901057             | 0.000904976              | 0.161488 | 1.83851 |
| sp_P17_P18_4_5_5-5_5_5 | 0.00142169              | 0.00142264               | 0.221783 | 1.77822 |
| sp_P15_P16_4_4_4-4_4_5 | 0.00148428              | 0.00148481               | 0.16478  | 1.83522 |
| sp_P14_P18_3_4_4-5_5_5 | 0.00149656              | 0.00149952               | 0.263368 | 1.73663 |
| sp_P8_P10_1_2_2-3_2_2  | 0.00154673              | 0.00154602               | 0.249575 | 1.75042 |
| sp_P13_P14_3_3_4-4_4_3 | 0.00199981              | 0.00200002               | 0.190992 | 1.80901 |
| sp_P14_P15_3_4_4-4_4_4 | 0.00258332              | 0.0025862                | 0.262472 | 1.73753 |
| sp_P12_P13_3_3_3-3_3_4 | 0.00270021              | 0.00270012               | 0.194665 | 1.80533 |
| sp_P11_P15_2_3_3-4_4_4 | 0.00271787              | 0.00271834               | 0.326347 | 1.67365 |
| sp_P12_P16_3_3_3-4_4_5 | 0.0029605               | 0.00296158               | 0.195328 | 1.80467 |
| sp_P10_P16_2_2_3-5_5_3 | 0.00379172              | 0.00379013               | 0.25901  | 1.74099 |
| sp_P13_P18_2_4_4-5_5_5 | 0.00409146              | 0.00409172               | 0.270833 | 1.72917 |

| name                   | $\Delta_l$ | $\Delta_a$ | $c_l$    | $c_a$   |
|------------------------|------------|------------|----------|---------|
| sp_P15_P15_3_4_5-5_4_3 | 0.00419013 | 0.0041907  | 0.25672  | 1.74328 |
| sp_P13_P14_2_4_4-5_3_3 | 0.0042491  | 0.00424906 | 0.205648 | 1.79435 |
| sp_P16_P18_4_4_5-5_5_5 | 0.00476041 | 0.00477416 | 0.177828 | 1.82217 |
| sp_P13_P17_3_3_4-5_5_4 | 0.00503603 | 0.0050381  | 0.209001 | 1.791   |
| sp_P13_P14_3_3_4-3_3_5 | 0.00506165 | 0.00506545 | 0.259225 | 1.74078 |
| sp_P15_P17_4_4_4-4_5_5 | 0.00507796 | 0.00508003 | 0.222421 | 1.77758 |
| sp_P10_P11_2_2_3-3_3_2 | 0.00530961 | 0.0053131  | 0.247641 | 1.75236 |
| sp_P11_P12_2_3_3-3_3_3 | 0.00538073 | 0.00538126 | 0.316738 | 1.68326 |
| sp_P8_P12_1_2_2-3_3_3  | 0.00559242 | 0.00559337 | 0.427226 | 1.57277 |
| sp_P9_P10_2_2_2-2_2_3  | 0.00563219 | 0.00563193 | 0.232572 | 1.76743 |
| sp_P14_P17_3_4_4-4_5_5 | 0.00633686 | 0.00633731 | 0.344324 | 1.65568 |
| sp_P9_P13_2_2_2-3_3_4  | 0.00635768 | 0.0063657  | 0.220639 | 1.77936 |
| sp_P17_P17_4_5_5-5_4_5 | 0.00664682 | 0.00664731 | 0.279328 | 1.72067 |
| sp_P11_P18_2_3_3-5_5_5 | 0.00666549 | 0.00667904 | 0.333328 | 1.66667 |
| sp_P16_P17_3_5_5-4_5_5 | 0.00706636 | 0.00706618 | 0.33116  | 1.66884 |
| sp_P10_P14_1_3_3-3_4_4 | 0.00751586 | 0.007514   | 0.293963 | 1.70604 |
| sp_P14_P16_3_4_4-4_4_5 | 0.00764437 | 0.00764248 | 0.261939 | 1.73806 |
| sp_P16_P16_4_4_5-4_5_4 | 0.00802144 | 0.0080267  | 0.203825 | 1.79618 |
| sp_P16_P18_3_5_5-5_5_5 | 0.00807904 | 0.00808325 | 0.227011 | 1.77299 |
| sp_P12_P12_2_3_4-4_3_2 | 0.00812155 | 0.00813995 | 0.284471 | 1.71553 |
| sp_P9_P14_2_2_2-3_3_5  | 0.0082904  | 0.00829421 | 0.217959 | 1.78204 |
| sp_P11_P14_2_3_3-5_3_3 | 0.00832192 | 0.00833733 | 0.196845 | 1.80315 |
| sp_P16_P16_3_5_5-5_4_4 | 0.0083465  | 0.00834945 | 0.176267 | 1.82373 |
| sp_P16_P16_4_4_5-5_5_3 | 0.00835333 | 0.00835169 | 0.176389 | 1.82361 |
| sp_P13_P15_3_3_4-4_4_4 | 0.008692   | 0.00870379 | 0.215377 | 1.78462 |
| sp_P14_P14_2_4_5-5_4_2 | 0.00519448 | 0.00885847 | 0.467735 | 1.53226 |
| sp_P11_P12_2_2_4-2_2_5 | 0.00894994 | 0.00895236 | 0.461711 | 1.53829 |
| sp_P12_P14_3_3_3-3_3_5 | 0.00895239 | 0.00895679 | 0.226481 | 1.77352 |
| sp_P9_P16_2_2_2-4_4_5  | 0.00896138 | 0.00897904 | 0.24105  | 1.75895 |
| sp_P10_P11_2_2_3-2_2_4 | 0.0090401  | 0.00903998 | 0.360865 | 1.63914 |
| sp_P12_P14_3_3_3-3_4_4 | 0.00927734 | 0.00929207 | 0.258333 | 1.74167 |
| sp_P13_P16_3_3_4-5_5_3 | 0.00950293 | 0.00951788 | 0.202118 | 1.79788 |
| sp_P13_P16_2_4_4-5_4_4 | 0.00956489 | 0.00958909 | 0.193657 | 1.80634 |
| sp_P14_P17_3_4_4-5_4_5 | 0.00966561 | 0.00966959 | 0.269746 | 1.73025 |
| sp_P15_P17_3_4_5-5_5_4 | 0.0100197  | 0.0100289  | 0.213662 | 1.78634 |
| sp_P15_P15_4_4_4-5_3_4 | 0.0102406  | 0.0102458  | 0.38051  | 1.61949 |
| sp_P15_P15_3_4_5-4_4_4 | 0.0102285  | 0.0102501  | 0.380296 | 1.6197  |
| sp_P13_P16_3_3_4-4_4_5 | 0.0103751  | 0.0103752  | 0.245121 | 1.75488 |
| sp_P12_P14_2_3_4-5_4_2 | 0.0105014  | 0.0104992  | 0.313581 | 1.68642 |

| name                   | $\Delta_l$ | $\Delta_a$ | $c_l$    | $c_a$   |
|------------------------|------------|------------|----------|---------|
| sp_P12_P17_3_3_3-4_5_5 | 0.0105362  | 0.0105419  | 0.239084 | 1.76092 |
| sp_P16_P17_4_4_5-4_5_5 | 0.0107693  | 0.0107689  | 0.272729 | 1.72727 |
| sp_P7_P10_1_1_2-3_3_1  | 0.0109155  | 0.0109266  | 0.387205 | 1.6128  |
| sp_P11_P17_2_3_3-5_4_5 | 0.0113138  | 0.0113135  | 0.230864 | 1.76914 |
| sp_P14_P14_3_4_4-4_3_4 | 0.0114427  | 0.0114527  | 0.336927 | 1.66307 |
| sp_P14_P16_3_3_5-5_5_3 | 0.0115592  | 0.0115592  | 0.224779 | 1.77522 |
| sp_P11_P14_2_3_3-3_4_4 | 0.0116878  | 0.0116933  | 0.460977 | 1.53902 |
| sp_P10_P14_2_2_3-4_4_3 | 0.0117852  | 0.0118024  | 0.252917 | 1.74708 |
| sp_P15_P18_3_4_5-5_5_5 | 0.0120785  | 0.0120778  | 0.263063 | 1.73694 |
| sp_P12_P15_2_3_4-5_4_3 | 0.0121505  | 0.0121479  | 0.240926 | 1.75907 |
| sp_P13_P18_3_3_4-5_5_5 | 0.0127609  | 0.0127661  | 0.230472 | 1.76953 |
| sp_P10_P13_2_2_3-4_4_2 | 0.0130177  | 0.0130191  | 0.253665 | 1.74634 |
| sp_P15_P17_3_4_5-4_5_5 | 0.0130275  | 0.0130451  | 0.248473 | 1.75153 |
| sp_P14_P15_3_4_4-5_3_4 | 0.0131542  | 0.0131464  | 0.212796 | 1.7872  |
| sp_P10_P15_2_2_3-4_5_3 | 0.0132603  | 0.0132603  | 0.258425 | 1.74157 |
| sp_P11_P16_2_3_3-4_4_5 | 0.0133357  | 0.0133257  | 0.322632 | 1.67737 |
| sp_P8_P9_1_2_2-2_2_2   | 0.0135573  | 0.0135799  | 0.394794 | 1.60521 |
| sp_P11_P15_2_2_4-5_5_2 | 0.0136329  | 0.0136385  | 0.303121 | 1.69688 |
| sp_P13_P13_3_3_4-3_4_3 | 0.0140083  | 0.0140092  | 0.225849 | 1.77415 |
| sp_P6_P7_1_1_1-1_1_2   | 0.0142361  | 0.0142507  | 0.217489 | 1.78251 |
| sp_P13_P13_3_3_4-4_4_2 | 0.0142281  | 0.0142711  | 0.210769 | 1.78923 |
| sp_P13_P13_2_4_4-4_3_3 | 0.0142764  | 0.0142635  | 0.210184 | 1.78982 |
| sp_P13_P14_2_4_4-3_4_4 | 0.014279   | 0.0142931  | 0.428131 | 1.57187 |
| sp_P14_P15_2_4_5-5_4_3 | 0.0143124  | 0.0143134  | 0.312473 | 1.68753 |
| sp_P15_P16_3_4_5-4_4_5 | 0.0144059  | 0.0144329  | 0.374318 | 1.62568 |
| sp_P15_P16_3_4_5-5_5_3 | 0.0145197  | 0.0145193  | 0.242648 | 1.75735 |
| sp_P11_P13_2_3_3-3_3_4 | 0.0148189  | 0.0148147  | 0.327142 | 1.67286 |
| sp_P13_P15_3_3_4-4_5_3 | 0.0149488  | 0.014942   | 0.250808 | 1.74919 |
| sp_P13_P15_2_4_4-4_4_4 | 0.0150546  | 0.0150662  | 0.261888 | 1.73811 |
| sp_P13_P16_3_3_4-4_5_4 | 0.0152041  | 0.0152113  | 0.255503 | 1.7445  |
| sp_P14_P15_3_4_4-3_4_5 | 0.015608   | 0.0156255  | 0.298074 | 1.70193 |
| sp_P13_P13_2_4_4-2_4_4 | 0.0156489  | 0.0156493  | 0.238502 | 1.7615  |
| sp_P13_P13_2_3_5-2_3_5 | 0.0156504  | 0.0156568  | 0.238478 | 1.76152 |
| sp_P15_P16_3_4_5-5_4_4 | 0.0157952  | 0.0157849  | 0.262351 | 1.73765 |
| sp_P11_P14_2_3_3-4_3_4 | 0.0160597  | 0.0160576  | 0.333475 | 1.66653 |
| sp_P14_P14_3_4_4-5_3_3 | 0.0160911  | 0.0160896  | 0.221765 | 1.77823 |
| sp_P14_P14_3_3_5-4_4_3 | 0.0160711  | 0.0160955  | 0.222269 | 1.77773 |
| sp_P7_P8_1_1_2-1_1_3   | 0.0163956  | 0.0164117  | 0.603318 | 1.39668 |
| sp_P13_P16_2_4_4-3_5_5 | 0.0168535  | 0.0168537  | 0.578446 | 1.42155 |

| name                   | $\Delta_l$ | $\Delta_a$ | $c_l$    | $c_a$   |
|------------------------|------------|------------|----------|---------|
| sp_P12_P16_2_3_4-5_5_3 | 0.016979   | 0.0169917  | 0.183329 | 1.81667 |
| sp_P11_P15_2_3_3-5_3_4 | 0.0171252  | 0.0171193  | 0.237345 | 1.76265 |
| sp_P12_P14_2_3_4-4_4_3 | 0.0171398  | 0.0171286  | 0.261242 | 1.73876 |
| sp_P15_P16_4_4_4-3_5_5 | 0.0172015  | 0.0172195  | 0.228487 | 1.77151 |
| sp_P9_P11_2_2_2-2_2_4  | 0.0171938  | 0.0172232  | 0.293464 | 1.70654 |
| sp_P10_P17_2_2_3-5_5_4 | 0.0172527  | 0.0172559  | 0.279026 | 1.72097 |
| sp_P13_P15_2_4_4-5_3_4 | 0.0175612  | 0.0175867  | 0.301787 | 1.69821 |
| sp_P6_P10_1_1_1-2_2_3  | 0.0178918  | 0.0179196  | 0.245317 | 1.75468 |
| sp_P16_P17_3_5_5-5_4_5 | 0.0179378  | 0.0179351  | 0.286242 | 1.71376 |
| sp_P12_P15_3_3_3-3_4_5 | 0.0179377  | 0.0179744  | 0.30903  | 1.69097 |
| sp_P10_P12_2_2_3-3_3_3 | 0.0180877  | 0.018088   | 0.268739 | 1.73126 |
| sp_P9_P17_2_2_2-4_5_5  | 0.0185759  | 0.0185818  | 0.306166 | 1.69383 |
| sp_P7_P8_1_1_2-2_2_1   | 0.0187984  | 0.0188022  | 0.401108 | 1.59889 |
| sp_P11_P17_2_3_3-4_5_5 | 0.0188764  | 0.0188715  | 0.386114 | 1.61389 |
| sp_P13_P14_3_3_4-3_4_4 | 0.0189952  | 0.0189975  | 0.344854 | 1.65515 |
| sp_P10_P12_2_2_3-2_2_5 | 0.0190053  | 0.0190153  | 0.399538 | 1.60046 |
| sp_P15_P16_3_4_5-4_5_4 | 0.0197459  | 0.0197502  | 0.208155 | 1.79184 |
| sp_P9_P11_2_2_2-2_3_3  | 0.0197876  | 0.0198143  | 0.348877 | 1.65112 |
| sp_P9_P9_1_2_3-3_2_1   | 0.0199712  | 0.0199716  | 0.52233  | 1.47767 |
| sp_P14_P15_3_3_5-4_4_4 | 0.0201815  | 0.0202075  | 0.246378 | 1.75362 |
| sp_P9_P14_2_2_2-3_4_4  | 0.0202004  | 0.0202171  | 0.334606 | 1.66539 |
| sp_P12_P17_2_3_4-5_5_4 | 0.0203494  | 0.0203698  | 0.271358 | 1.72864 |
| sp_P12_P12_2_3_4-3_3_3 | 0.0203673  | 0.020375   | 0.472841 | 1.52716 |
| sp_P12_P12_3_3_3-4_2_3 | 0.0203228  | 0.0203768  | 0.473391 | 1.52661 |
| sp_P12_P13_2_3_4-4_4_2 | 0.0204101  | 0.0204708  | 0.239025 | 1.76098 |
| sp_P14_P16_3_3_5-4_4_5 | 0.020469   | 0.0204733  | 0.272298 | 1.7277  |
| sp_P13_P17_2_4_4-5_4_5 | 0.0205608  | 0.0205619  | 0.304172 | 1.69583 |
| sp_P13_P15_2_4_4-3_4_5 | 0.0207433  | 0.0207362  | 0.313907 | 1.68609 |
| sp_P13_P17_3_3_4-4_5_5 | 0.0208005  | 0.0208047  | 0.335178 | 1.66482 |
| sp_P10_P13_2_2_3-3_3_4 | 0.0210881  | 0.0210874  | 0.326967 | 1.67303 |
| sp_P11_P12_2_3_3-4_2_3 | 0.0211526  | 0.0211924  | 0.255522 | 1.74448 |
| sp_P11_P11_2_3_3-3_2_3 | 0.0212521  | 0.0212661  | 0.413176 | 1.58682 |
| sp_P14_P16_3_4_4-3_5_5 | 0.0213252  | 0.0213478  | 0.346501 | 1.6535  |
| sp_P12_P15_2_3_4-4_4_4 | 0.0215198  | 0.0215164  | 0.324805 | 1.67519 |
| sp_P14_P17_2_4_5-4_5_5 | 0.0222377  | 0.0222503  | 0.36327  | 1.63673 |
| sp_P14_P17_3_3_5-5_5_4 | 0.0225501  | 0.0225516  | 0.240166 | 1.75983 |
| sp_P14_P15_3_3_5-4_5_3 | 0.022641   | 0.0226352  | 0.231127 | 1.76887 |
| sp_P12_P15_2_3_4-5_5_2 | 0.0226855  | 0.0227044  | 0.297272 | 1.70273 |
| sp_P15_P18_2_5_5-5_5_5 | 0.0229533  | 0.0229403  | 0.218284 | 1.78172 |

| name                   | $\Delta_l$ | $\Delta_a$ | $c_l$    | $c_a$   |
|------------------------|------------|------------|----------|---------|
| sp_P12_P14_2_3_4-3_4_4 | 0.0229788  | 0.0230026  | 0.32381  | 1.67619 |
| sp_P13_P15_3_3_4-3_4_5 | 0.0230449  | 0.023036   | 0.414769 | 1.58523 |
| sp_P14_P18_2_4_5-5_5_5 | 0.0231132  | 0.0231037  | 0.360312 | 1.63969 |
| sp_P11_P14_2_3_3-3_3_5 | 0.0231931  | 0.02319    | 0.271951 | 1.72805 |
| sp_P10_P14_2_2_3-3_3_5 | 0.0232366  | 0.0232471  | 0.332821 | 1.66718 |
| sp_P14_P16_2_4_5-3_5_5 | 0.023257   | 0.0233154  | 0.288403 | 1.7116  |
| sp_P14_P17_2_4_5-5_5_4 | 0.023509   | 0.0235179  | 0.237574 | 1.76243 |
| sp_P15_P16_2_5_5-3_5_5 | 0.0237094  | 0.0237219  | 0.401348 | 1.59865 |
| sp_P15_P17_3_4_5-5_4_5 | 0.0239418  | 0.0239607  | 0.315027 | 1.68497 |
| sp_P16_P16_3_5_5-4_4_5 | 0.0239245  | 0.0239611  | 0.324404 | 1.6756  |
| sp_P16_P16_4_4_5-5_3_5 | 0.0239678  | 0.0239684  | 0.324447 | 1.67555 |
| sp_P12_P15_2_3_4-3_4_5 | 0.0241077  | 0.024103   | 0.47716  | 1.52284 |
| sp_P15_P16_2_5_5-5_4_4 | 0.0246093  | 0.0246893  | 0.179318 | 1.82068 |
| sp_P13_P16_2_4_4-4_4_5 | 0.0248889  | 0.0248984  | 0.330417 | 1.66958 |
| sp_P8_P11_1_2_2-2_3_3  | 0.0249286  | 0.0249668  | 0.723206 | 1.27679 |
| sp_P15_P15_3_4_5-3_5_4 | 0.0249798  | 0.024992   | 0.227671 | 1.77233 |
| sp_P10_P15_2_2_3-4_4_4 | 0.0250211  | 0.0250242  | 0.293003 | 1.707   |
| sp_P15_P17_2_5_5-4_5_5 | 0.0252764  | 0.0252886  | 0.310107 | 1.68989 |
| sp_P14_P15_3_4_4-4_3_5 | 0.0253412  | 0.0253597  | 0.357988 | 1.64201 |
| sp_P14_P14_3_3_5-4_5_2 | 0.025829   | 0.0258575  | 0.231323 | 1.76868 |
| sp_P14_P14_2_4_5-5_3_3 | 0.0258676  | 0.025852   | 0.231552 | 1.76845 |
| sp_P11_P13_2_2_4-4_4_2 | 0.0258754  | 0.02587    | 0.28673  | 1.71327 |
| sp_P15_P16_3_4_5-3_5_5 | 0.0259578  | 0.025989   | 0.371393 | 1.62861 |
| sp_P10_P10_2_2_3-3_3_1 | 0.0260447  | 0.0260512  | 0.274164 | 1.72584 |
| sp_P10_P10_1_3_3-3_2_2 | 0.02605    | 0.0260531  | 0.27465  | 1.72535 |
| sp_P13_P13_2_4_4-5_2_3 | 0.0260611  | 0.0260795  | 0.319755 | 1.68025 |
| sp_P13_P13_2_3_5-4_4_2 | 0.0260829  | 0.0260762  | 0.319319 | 1.68068 |
| sp_P10_P10_2_2_3-2_3_2 | 0.0262745  | 0.0262832  | 0.250783 | 1.74922 |
| sp_P14_P16_2_4_5-5_4_4 | 0.0262921  | 0.0263016  | 0.351922 | 1.64808 |
| sp_P14_P15_2_4_5-3_4_5 | 0.0263755  | 0.0263361  | 0.575415 | 1.42459 |
| sp_P14_P16_3_4_4-5_3_5 | 0.0263773  | 0.0264196  | 0.284577 | 1.71542 |
| sp_P11_P15_2_3_3-4_3_5 | 0.0264216  | 0.0264043  | 0.40227  | 1.59773 |
| sp_P12_P18_2_3_4-5_5_5 | 0.0265353  | 0.0265569  | 0.324812 | 1.67519 |
| sp_P10_P12_2_2_3-3_4_2 | 0.0266455  | 0.0266396  | 0.277693 | 1.72231 |
| sp_P12_P13_2_3_4-3_3_4 | 0.0267642  | 0.0267671  | 0.498328 | 1.50167 |
| sp_P13_P14_3_3_4-3_5_3 | 0.0268355  | 0.026889   | 0.211772 | 1.78823 |
| sp_P12_P16_2_3_4-5_4_4 | 0.0269212  | 0.026924   | 0.300155 | 1.69985 |
| sp_P12_P13_2_3_4-4_3_3 | 0.0273337  | 0.0273427  | 0.314552 | 1.68545 |
| sp_P8_P11_1_2_2-3_2_3  | 0.0275148  | 0.0275132  | 0.520365 | 1.47964 |

| name                   | $\Delta_l$ | $\Delta_a$ | $c_l$    | $c_a$   |
|------------------------|------------|------------|----------|---------|
| sp_P14_P18_3_3_5-5_5_5 | 0.0275597  | 0.0276041  | 0.259804 | 1.7402  |
| sp_P12_P13_2_3_4-2_3_5 | 0.0278373  | 0.0278758  | 0.395341 | 1.60466 |
| sp_P12_P16_2_3_4-4_5_4 | 0.0280941  | 0.0280959  | 0.308262 | 1.69174 |
| sp_P14_P15_2_4_5-4_4_4 | 0.0281391  | 0.0281435  | 0.410007 | 1.58999 |
| sp_P10_P13_2_2_3-3_4_3 | 0.0282581  | 0.0282535  | 0.316092 | 1.68391 |
| sp_P14_P14_2_4_5-2_4_5 | 0.028264   | 0.028526   | 0.192763 | 1.80724 |
| sp_P16_P16_3_5_5-5_3_5 | 0.0287073  | 0.0287247  | 0.305078 | 1.69492 |
| sp_P12_P16_2_3_4-4_4_5 | 0.0287781  | 0.0288021  | 0.312984 | 1.68702 |
| sp_P13_P14_3_3_4-4_5_2 | 0.0289993  | 0.0290845  | 0.380888 | 1.61911 |
| sp_P11_P14_2_2_4-4_5_2 | 0.0291353  | 0.0291429  | 0.279221 | 1.72078 |
| sp_P10_P18_2_2_3-5_5_5 | 0.0292429  | 0.0292633  | 0.310877 | 1.68912 |
| sp_P9_P12_2_2_2-2_2_5  | 0.0293687  | 0.0293868  | 0.335259 | 1.66474 |
| sp_P10_P16_2_2_3-4_5_4 | 0.029611   | 0.0296462  | 0.358879 | 1.64112 |
| sp_P11_P12_2_3_3-2_3_4 | 0.0296833  | 0.0296929  | 0.404494 | 1.59551 |
| sp_P11_P15_2_3_3-3_4_5 | 0.0297965  | 0.0298483  | 0.412557 | 1.58744 |
| sp_P12_P14_2_3_4-3_3_5 | 0.0300199  | 0.0300208  | 0.505774 | 1.49423 |
| sp_P12_P14_2_3_4-5_3_3 | 0.0299697  | 0.0301008  | 0.247564 | 1.75244 |
| sp_P10_P16_2_2_3-4_4_5 | 0.0301613  | 0.0302237  | 0.338035 | 1.66197 |
| sp_P10_P14_2_2_3-4_5_2 | 0.0303519  | 0.0303639  | 0.394545 | 1.60545 |
| sp_P12_P16_3_3_3-3_5_5 | 0.0303809  | 0.0304277  | 0.256998 | 1.743   |
| sp_P13_P14_2_4_4-4_3_4 | 0.0307699  | 0.030775   | 0.335646 | 1.66435 |
| sp_P13_P15_3_3_4-5_5_2 | 0.0308778  | 0.0309098  | 0.194722 | 1.80528 |
| sp_P14_P16_2_4_5-5_5_3 | 0.0308888  | 0.0309402  | 0.205487 | 1.79451 |
| sp_P8_P13_1_2_2-3_3_4  | 0.0311183  | 0.0311399  | 0.403937 | 1.59606 |
| sp_P12_P17_2_3_4-4_5_5 | 0.0312546  | 0.0312674  | 0.417895 | 1.58211 |
| sp_P9_P15_2_2_2-3_4_5  | 0.0313063  | 0.0313005  | 0.31864  | 1.68136 |
| sp_P7_P9_1_1_2-1_1_4   | 0.0315356  | 0.0315453  | 0.698815 | 1.30118 |
| sp_P12_P13_3_3_3-2_4_4 | 0.0316127  | 0.0316397  | 0.279084 | 1.72092 |
| sp_P10_P15_2_2_3-5_5_2 | 0.0316588  | 0.0317033  | 0.255171 | 1.74483 |
| sp_P14_P14_3_3_5-3_4_4 | 0.0318247  | 0.0318421  | 0.327621 | 1.67238 |
| sp_P14_P14_4_3_4-5_3_3 | 0.0317813  | 0.031844   | 0.327604 | 1.6724  |
| sp_P10_P12_1_3_3-3_3_3 | 0.0319811  | 0.0320469  | 0.332805 | 1.6672  |
| sp_P13_P15_3_3_4-3_5_4 | 0.0320503  | 0.0320465  | 0.310366 | 1.68963 |
| sp_P14_P16_3_3_5-4_5_4 | 0.0320561  | 0.0320527  | 0.267037 | 1.73296 |
| sp_P11_P13_2_3_3-5_2_3 | 0.0322687  | 0.0322538  | 0.427603 | 1.5724  |
| sp_P14_P15_3_3_5-3_4_5 | 0.0325937  | 0.0326019  | 0.445809 | 1.55419 |
| sp_P11_P11_2_2_4-3_3_2 | 0.0326385  | 0.0326324  | 0.281025 | 1.71898 |
| sp_P11_P11_2_3_3-4_2_2 | 0.0326436  | 0.0326433  | 0.28134  | 1.71866 |
| sp_P15_P15_3_4_5-5_3_4 | 0.0327861  | 0.0328218  | 0.263453 | 1.73655 |

| name                   | $\Delta_l$ | $\Delta_a$ | $c_l$     | $c_a$   |
|------------------------|------------|------------|-----------|---------|
| sp_P15_P15_3_4_5-4_5_3 | 0.0327786  | 0.0328236  | 0.26335   | 1.73665 |
| sp_P15_P15_3_4_5-4_3_5 | 0.0328174  | 0.0329044  | 0.425088  | 1.57491 |
| sp_P11_P16_2_3_3-5_3_5 | 0.032993   | 0.0329923  | 0.287786  | 1.71221 |
| sp_P14_P14_4_3_4-5_2_4 | 0.0330917  | 0.033097   | 0.418858  | 1.58114 |
| sp_P14_P14_2_4_5-3_4_4 | 0.0330671  | 0.0331475  | 0.418811  | 1.58119 |
| sp_P13_P15_2_3_5-3_4_5 | 0.0332776  | 0.0332987  | 0.356021  | 1.64398 |
| sp_P14_P14_2_4_5-4_4_3 | 0.0333277  | 0.0333372  | 0.220567  | 1.77943 |
| sp_P14_P14_3_4_4-5_2_4 | 0.0332798  | 0.0333445  | 0.220656  | 1.77934 |
| sp_P10_P11_1_3_3-2_3_3 | 0.0334721  | 0.033486   | 0.590095  | 1.4099  |
| sp_P7_P11_1_1_2-3_3_2  | 0.0337998  | 0.0337857  | 0.37185   | 1.62815 |
| sp_P8_P10_1_2_2-2_2_3  | 0.0339426  | 0.0339543  | 0.432685  | 1.56732 |
| sp_P10_P14_2_2_3-3_5_3 | 0.0341595  | 0.034179   | 0.300317  | 1.69968 |
| sp_P6_P13_1_1_1-3_3_4  | 0.0343657  | 0.0170061  | 0.165959  | 1.83404 |
| sp_P12_P13_2_3_4-3_4_3 | 0.034745   | 0.0347867  | 0.253458  | 1.74654 |
| sp_P15_P15_3_4_5-5_5_2 | 0.0350237  | 0.0236992  | 0.165959  | 1.83404 |
| sp_P15_P15_2_5_5-5_3_4 | 0.0350305  | 0.0237161  | 0.165959  | 1.83404 |
| sp_P9_P11_1_2_3-3_3_2  | 0.0351339  | 0.0351431  | 0.356004  | 1.644   |
| sp_P13_P16_2_3_5-5_5_3 | 0.0351172  | 0.0351962  | 0.263468  | 1.73653 |
| sp_P15_P17_2_5_5-5_4_5 | 0.0356974  | 0.0357225  | 0.264167  | 1.73583 |
| sp_P9_P9_1_2_3-1_2_3   | 0.0351203  | 0.0357245  | 0.282092  | 1.71791 |
| sp_P13_P14_2_4_4-5_2_4 | 0.0358385  | 0.0358396  | 0.239165  | 1.76084 |
| sp_P6_P8_1_1_1-1_1_3   | 0.0358781  | 0.0358782  | 0.39218   | 1.60782 |
| sp_P12_P15_2_3_4-4_5_3 | 0.0358938  | 0.0359078  | 0.219517  | 1.78048 |
| sp_P14_P17_3_3_5-4_5_5 | 0.0358895  | 0.0359161  | 0.337088  | 1.66291 |
| sp_P10_P15_1_3_3-3_4_5 | 0.0360552  | 0.0360374  | 0.42978   | 1.57022 |
| sp_P14_P15_3_3_5-5_5_2 | 0.0361223  | 0.00127295 | 0.0042658 | 1.99573 |
| sp_P12_P17_2_3_4-5_4_5 | 0.0362419  | 0.0362809  | 0.34969   | 1.65031 |
| sp_P14_P16_2_4_5-4_4_5 | 0.03637    | 0.036371   | 0.436852  | 1.56315 |
| sp_P12_P13_2_3_4-5_3_2 | 0.0365727  | 0.0366097  | 0.267163  | 1.73284 |
| sp_P13_P14_2_4_4-2_4_5 | 0.0366776  | 0.0366806  | 0.384256  | 1.61574 |
| sp_P9_P12_2_2_2-2_3_4  | 0.0366648  | 0.0367122  | 0.411898  | 1.5881  |
| sp_P13_P16_2_4_4-5_3_5 | 0.0367681  | 0.0368072  | 0.320138  | 1.67986 |
| sp_P14_P16_2_4_5-4_5_4 | 0.0367577  | 0.0368091  | 0.25592   | 1.74408 |
| sp_P10_P11_2_2_3-2_3_3 | 0.0368271  | 0.03685    | 0.467055  | 1.53294 |
| sp_P10_P17_2_2_3-4_5_5 | 0.036861   | 0.0369272  | 0.4304    | 1.5696  |
| sp_P10_P14_2_2_3-3_4_4 | 0.0369663  | 0.0369725  | 0.448447  | 1.55155 |
| sp_P11_P16_2_2_4-5_5_3 | 0.0373145  | 0.0373701  | 0.311395  | 1.68861 |
| sp_P8_P14_1_2_2-3_4_4  | 0.0374614  | 0.0374438  | 0.613926  | 1.38607 |
| sp_P15_P15_2_5_5-4_4_4 | 0.037401   | 0.0374655  | 0.224011  | 1.77599 |

| name                   | $\Delta_l$ | $\Delta_a$ | $c_l$    | $c_a$   |
|------------------------|------------|------------|----------|---------|
| sp_P15_P15_4_4_4-5_2_5 | 0.0374299  | 0.0374752  | 0.224108 | 1.77589 |
| sp_P13_P14_2_3_5-4_4_3 | 0.0376695  | 0.037718   | 0.35954  | 1.64046 |
| sp_P14_P14_3_3_5-3_5_3 | 0.0378876  | 0.0378962  | 0.195406 | 1.80459 |
| sp_P11_P14_2_2_4-3_3_5 | 0.0382183  | 0.0382561  | 0.41795  | 1.58205 |
| sp_P13_P14_2_3_5-3_4_4 | 0.0383852  | 0.0384308  | 0.329946 | 1.67005 |
| sp_P14_P17_2_4_5-5_4_5 | 0.03874    | 0.0388193  | 0.363555 | 1.63644 |
| sp_P11_P12_2_2_4-3_4_2 | 0.0392697  | 0.0392444  | 0.255506 | 1.74449 |
| sp_P15_P15_2_5_5-2_5_5 | 0.0393294  | 0.0393402  | 0.165529 | 1.83447 |
| sp_P8_P9_1_2_2-3_1_2   | 0.0393845  | 0.0394024  | 0.42432  | 1.57568 |
| sp_P6_P14_1_1_1-3_4_4  | 0.0394941  | 0.0332276  | 0.436516 | 1.56348 |
| sp_P8_P8_1_2_2-2_1_2   | 0.039566   | 0.0395862  | 0.423988 | 1.57601 |
| sp_P11_P13_2_2_4-3_3_4 | 0.0395919  | 0.0395715  | 0.37996  | 1.62004 |
| sp_P11_P12_2_2_4-3_3_3 | 0.0396413  | 0.0397025  | 0.329358 | 1.67064 |
| sp_P13_P16_3_3_4-3_5_5 | 0.0404856  | 0.0405114  | 0.355088 | 1.64491 |
| sp_P12_P14_2_3_4-4_3_4 | 0.0409257  | 0.0408956  | 0.397203 | 1.6028  |
| sp_P11_P13_2_3_3-2_4_4 | 0.0409744  | 0.041006   | 0.44998  | 1.55002 |
| sp_P12_P16_1_4_4-3_5_5 | 0.0411916  | 0.0411925  | 0.179419 | 1.82058 |
| sp_P13_P13_2_3_5-5_3_2 | 0.0412564  | 0.0412418  | 0.309785 | 1.69021 |
| sp_P13_P13_2_4_4-3_3_4 | 0.0418272  | 0.0418274  | 0.41276  | 1.58724 |
| sp_P13_P13_3_3_4-4_2_4 | 0.041819   | 0.0418327  | 0.412581 | 1.58742 |
| sp_P13_P15_2_3_5-4_5_3 | 0.0420807  | 0.0421077  | 0.230971 | 1.76903 |
| sp_P12_P13_3_3_3-2_3_5 | 0.0422523  | 0.0423064  | 0.470214 | 1.52979 |
| sp_P13_P15_2_3_5-5_4_3 | 0.0423876  | 0.0424301  | 0.300772 | 1.69923 |
| sp_P11_P13_2_3_3-4_2_4 | 0.0425639  | 0.0425466  | 0.323121 | 1.67688 |
| sp_P11_P14_2_3_3-5_2_4 | 0.0425902  | 0.0426339  | 0.239708 | 1.76029 |
| sp_P15_P16_3_4_5-5_3_5 | 0.0427658  | 0.0428651  | 0.339144 | 1.66086 |
| sp_P14_P14_2_4_5-2_5_4 | 0.0429581  | 0.0429114  | 0.287337 | 1.71266 |
| sp_P6_P11_1_1_1-2_3_3  | 0.0434931  | 0.0434927  | 0.532502 | 1.4675  |
| sp_P12_P12_2_3_4-2_4_3 | 0.0439368  | 0.043932   | 0.294114 | 1.70589 |
| sp_P14_P15_2_4_5-5_3_4 | 0.0439589  | 0.0439438  | 0.313318 | 1.68668 |
| sp_P13_P13_2_4_4-4_2_4 | 0.0439888  | 0.0440334  | 0.342818 | 1.65718 |
| sp_P14_P15_2_4_5-2_5_5 | 0.0440878  | 0.0441627  | 0.407229 | 1.59277 |
| sp_P9_P12_1_2_3-3_3_3  | 0.044166   | 0.0441675  | 0.39128  | 1.60872 |
| sp_P10_P12_1_3_3-2_3_4 | 0.0441648  | 0.0441768  | 0.331942 | 1.66806 |
| sp_P11_P14_1_3_4-3_4_4 | 0.0440461  | 0.0441821  | 0.467735 | 1.53226 |
| sp_P11_P14_2_2_4-4_4_3 | 0.0442128  | 0.0442788  | 0.312958 | 1.68704 |
| sp_P7_P9_1_1_2-2_2_2   | 0.0444757  | 0.0444722  | 0.312623 | 1.68738 |
| sp_P12_P13_2_3_4-2_4_4 | 0.044511   | 0.0444746  | 0.522301 | 1.4777  |
| sp_P12_P15_2_3_4-3_5_4 | 0.044673   | 0.0446781  | 0.401415 | 1.59859 |



| name                   | $\Delta_l$ | $\Delta_a$ | $c_l$    | $c_a$   |
|------------------------|------------|------------|----------|---------|
| sp_P13_P17_2_3_5-5_5_4 | 0.0451205  | 0.0451124  | 0.29208  | 1.70792 |
| sp_P8_P14_1_2_2-3_3_5  | 0.045085   | 0.0451943  | 0.420545 | 1.57945 |
| sp_P15_P16_2_5_5-4_4_5 | 0.0451721  | 0.0452473  | 0.317003 | 1.683   |
| sp_P13_P15_2_3_5-4_4_4 | 0.0452086  | 0.0453028  | 0.394728 | 1.60527 |
| sp_P11_P16_2_3_3-3_5_5 | 0.04535    | 0.0453498  | 0.387747 | 1.61225 |
| sp_P13_P15_2_4_4-2_5_5 | 0.0454294  | 0.0454246  | 0.515539 | 1.48446 |
| sp_P10_P15_2_2_3-3_4_5 | 0.0455464  | 0.0455222  | 0.439823 | 1.56018 |
| sp_P10_P12_2_2_3-2_3_4 | 0.0455215  | 0.0455561  | 0.534853 | 1.46515 |
| sp_P12_P15_2_3_4-5_3_4 | 0.0460876  | 0.0460971  | 0.330636 | 1.66936 |
| sp_P8_P11_1_2_2-2_2_4  | 0.0462403  | 0.0462983  | 0.348367 | 1.65163 |
| sp_P14_P15_3_4_4-2_5_5 | 0.0462914  | 0.0463658  | 0.311563 | 1.68844 |
| sp_P9_P11_1_2_3-2_3_3  | 0.04637    | 0.0463921  | 0.460626 | 1.53937 |
| sp_P13_P13_2_3_5-3_4_3 | 0.0465174  | 0.0465034  | 0.271299 | 1.7287  |
| sp_P13_P13_3_3_4-5_2_3 | 0.046534   | 0.0465463  | 0.271314 | 1.72869 |
| sp_P14_P14_2_4_5-4_3_4 | 0.0466713  | 0.0466453  | 0.403495 | 1.5965  |
| sp_P14_P14_3_4_4-4_2_5 | 0.0466928  | 0.0466563  | 0.403091 | 1.59691 |
| sp_P9_P13_2_2_2-2_3_5  | 0.0467671  | 0.0468114  | 0.47958  | 1.52042 |
| sp_P9_P10_1_2_3-3_2_2  | 0.0468837  | 0.0468865  | 0.383467 | 1.61653 |
| sp_P15_P16_2_5_5-5_3_5 | 0.0469524  | 0.046986   | 0.28607  | 1.71393 |
| sp_P12_P14_1_4_4-3_4_4 | 0.0472442  | 0.0473621  | 0.370174 | 1.62983 |
| sp_P13_P14_2_3_5-3_3_5 | 0.0475149  | 0.0475398  | 0.604705 | 1.3953  |
| sp_P13_P13_4_3_3-5_2_3 | 0.0475038  | 0.0475563  | 0.530639 | 1.46936 |
| sp_P13_P13_2_3_5-3_3_4 | 0.0474063  | 0.0475705  | 0.532278 | 1.46772 |
| sp_P12_P14_3_3_3-2_4_5 | 0.0476247  | 0.0477307  | 0.346733 | 1.65327 |
| sp_P11_P12_2_3_3-3_2_4 | 0.0477309  | 0.0477337  | 0.453086 | 1.54691 |
| sp_P9_P9_1_2_3-2_2_2   | 0.047945   | 0.0479415  | 0.558602 | 1.4414  |
| sp_P9_P9_2_2_2-3_1_2   | 0.0479251  | 0.0479528  | 0.558543 | 1.44146 |
| sp_P14_P15_2_4_5-3_5_4 | 0.0479051  | 0.0479695  | 0.321125 | 1.67887 |
| sp_P11_P13_2_3_3-2_3_5 | 0.0479214  | 0.0479835  | 0.35916  | 1.64084 |
| sp_P12_P16_2_3_4-3_5_5 | 0.0481467  | 0.0481512  | 0.496487 | 1.50351 |
| sp_P9_P16_2_2_2-3_5_5  | 0.0483766  | 0.0484188  | 0.311476 | 1.68852 |
| sp_P13_P18_2_3_5-5_5_5 | 0.0484025  | 0.0484563  | 0.336106 | 1.66389 |
| sp_P13_P16_2_3_5-4_5_4 | 0.0484732  | 0.0485135  | 0.28699  | 1.71301 |
| sp_P13_P16_2_3_5-4_4_5 | 0.0485831  | 0.048608   | 0.431896 | 1.5681  |
| sp_P15_P15_4_3_5-5_2_5 | 0.0489025  | 0.0489298  | 0.406572 | 1.59343 |
| sp_P10_P13_1_3_3-2_4_4 | 0.0489518  | 0.0489312  | 0.473319 | 1.52668 |
| sp_P15_P15_2_5_5-3_4_5 | 0.0489375  | 0.0489647  | 0.406226 | 1.59377 |
| sp_P11_P15_2_2_4-4_5_3 | 0.0489637  | 0.048973   | 0.312622 | 1.68738 |
| sp_P7_P9_1_1_2-2_3_1   | 0.0489749  | 0.0490207  | 0.35323  | 1.64677 |

| name                   | $\Delta_l$ | $\Delta_a$ | $c_l$    | $c_a$   |
|------------------------|------------|------------|----------|---------|
| sp_P14_P15_3_4_4-5_2_5 | 0.0489422  | 0.0490215  | 0.265582 | 1.73442 |
| sp_P13_P17_2_3_5-4_5_5 | 0.0490645  | 0.0490864  | 0.350235 | 1.64976 |
| sp_P10_P13_1_3_3-3_3_4 | 0.0494136  | 0.0494133  | 0.427068 | 1.57293 |
| sp_P10_P16_1_3_3-3_5_5 | 0.0494634  | 0.0494496  | 0.58434  | 1.41566 |
| sp_P11_P15_1_3_4-3_5_4 | 0.0496443  | 0.0496363  | 0.397285 | 1.60272 |
| sp_P14_P15_3_3_5-3_5_4 | 0.0498369  | 0.0498264  | 0.315448 | 1.68455 |
| sp_P10_P11_2_2_3-2_4_2 | 0.0502025  | 0.0502029  | 0.306084 | 1.69392 |
| sp_P12_P15_2_3_4-4_3_5 | 0.0502394  | 0.0502257  | 0.457596 | 1.5424  |
| sp_P10_P15_2_2_3-3_5_4 | 0.0504134  | 0.0504092  | 0.415968 | 1.58403 |
| sp_P12_P14_2_3_4-4_5_2 | 0.0505007  | 0.0505099  | 0.297247 | 1.70275 |
| sp_P8_P9_1_1_3-1_1_4   | 0.0505819  | 0.0505408  | 0.681859 | 1.31814 |
| sp_P12_P14_2_3_4-2_4_5 | 0.0511005  | 0.051091   | 0.535736 | 1.46426 |
| sp_P12_P14_2_3_4-3_5_3 | 0.0512572  | 0.0513468  | 0.258188 | 1.74181 |
| sp_P13_P15_2_4_4-5_2_5 | 0.0512277  | 0.0513998  | 0.289728 | 1.71027 |
| sp_P13_P14_2_3_5-2_4_5 | 0.0515417  | 0.0515418  | 0.589773 | 1.41023 |
| sp_P13_P15_2_4_4-4_3_5 | 0.0513888  | 0.0515792  | 0.354813 | 1.64519 |
| sp_P12_P13_1_4_4-2_4_4 | 0.0515839  | 0.0516718  | 0.353582 | 1.64642 |
| sp_P11_P15_2_2_4-4_4_4 | 0.0516889  | 0.0516992  | 0.350877 | 1.64912 |
| sp_P10_P13_2_2_3-2_3_5 | 0.052288   | 0.0523313  | 0.528684 | 1.47132 |
| sp_P11_P17_2_2_4-5_5_4 | 0.0523809  | 0.0523867  | 0.334784 | 1.66522 |
| sp_P12_P13_2_3_4-5_2_3 | 0.0527712  | 0.0527803  | 0.262269 | 1.73773 |
| sp_P13_P13_4_2_4-5_2_3 | 0.0528016  | 0.0529045  | 0.389087 | 1.61091 |
| sp_P11_P12_1_3_4-3_3_3 | 0.0528599  | 0.0529058  | 0.435801 | 1.5642  |
| sp_P13_P13_2_3_5-2_4_4 | 0.052847   | 0.0529232  | 0.389265 | 1.61073 |
| sp_P12_P12_2_3_4-3_4_2 | 0.0531962  | 0.0532272  | 0.312247 | 1.68775 |
| sp_P12_P12_2_3_4-4_2_3 | 0.0531586  | 0.0532293  | 0.311888 | 1.68811 |
| sp_P6_P8_1_1_1-1_2_2   | 0.0532828  | 0.0532419  | 0.591379 | 1.40862 |
| sp_P11_P16_2_2_4-4_4_5 | 0.0534389  | 0.0534339  | 0.390438 | 1.60956 |
| sp_P14_P16_3_3_5-3_5_5 | 0.0535868  | 0.053595   | 0.405994 | 1.59401 |
| sp_P12_P14_2_2_5-3_3_5 | 0.053524   | 0.0535979  | 0.465718 | 1.53428 |
| sp_P14_P15_2_4_5-4_5_3 | 0.0536272  | 0.0537889  | 0.275901 | 1.7241  |
| sp_P12_P15_1_4_4-3_4_5 | 0.0540055  | 0.0540459  | 0.38634  | 1.61366 |
| sp_P13_P14_3_3_4-2_5_4 | 0.0541635  | 0.0541763  | 0.32849  | 1.67151 |
| sp_P10_P13_2_2_3-3_5_2 | 0.0541292  | 0.0541856  | 0.352646 | 1.64735 |
| sp_P15_P15_2_5_5-5_2_5 | 0.0440779  | 0.0542827  | 0.354813 | 1.64519 |
| sp_P7_P10_1_1_2-2_2_3  | 0.0543034  | 0.0543474  | 0.418514 | 1.58149 |
| sp_P8_P12_1_2_2-3_2_4  | 0.0544744  | 0.0544774  | 0.502273 | 1.49773 |
| sp_P7_P12_1_1_2-3_3_3  | 0.0544656  | 0.0544945  | 0.34592  | 1.65408 |
| sp_P13_P16_2_3_5-5_4_4 | 0.0544576  | 0.0545382  | 0.362608 | 1.63739 |

| name                   | $\Delta_l$ | $\Delta_a$ | $c_l$    | $c_a$    |
|------------------------|------------|------------|----------|----------|
| sp_P13_P14_3_3_4-2_4_5 | 0.0548251  | 0.0548492  | 0.423571 | 1.57643  |
| sp_P10_P11_1_3_3-3_2_3 | 0.0551797  | 0.0551645  | 0.387451 | 1.61255  |
| sp_P9_P13_1_2_3-3_4_3  | 0.0553081  | 0.0553597  | 0.440343 | 1.55966  |
| sp_P13_P13_2_3_5-4_3_3 | 0.0554435  | 0.0554685  | 0.367957 | 1.63204  |
| sp_P13_P13_3_3_4-5_3_2 | 0.0554761  | 0.0554443  | 0.367669 | 1.63233  |
| sp_P9_P10_1_2_3-2_2_3  | 0.05582    | 0.0558401  | 0.703043 | 1.29696  |
| sp_P9_P13_2_2_2-2_4_4  | 0.0558874  | 0.0558642  | 0.330787 | 1.66921  |
| sp_P7_P10_1_1_2-2_3_2  | 0.0561049  | 0.0561689  | 0.398287 | 1.60171  |
| sp_P10_P12_2_2_3-2_4_3 | 0.0563958  | 0.0564712  | 0.403235 | 1.59677  |
| sp_P9_P13_1_2_3-3_3_4  | 0.0567654  | 0.0568737  | 0.287287 | 1.71271  |
| sp_P12_P13_2_2_5-3_3_4 | 0.0569215  | 0.0569606  | 0.419488 | 1.58051  |
| sp_P11_P11_2_3_3-4_1_3 | 0.057121   | 0.0571041  | 0.273006 | 1.72699  |
| sp_P11_P11_1_3_4-3_3_2 | 0.0571223  | 0.0571629  | 0.273585 | 1.72642  |
| sp_P12_P15_3_3_3-2_5_5 | 0.057153   | 0.0571726  | 0.24116  | 1.75884  |
| sp_P11_P12_2_3_3-5_2_2 | 0.057399   | 0.0573852  | 0.324117 | 1.67588  |
| sp_P8_P17_1_2_2-4_5_5  | 0.0158723  | 0.0576392  | 1.12904  | 0.870964 |
| sp_P11_P13_2_2_4-3_5_2 | 0.0576578  | 0.057681   | 0.25849  | 1.74151  |
| sp_P11_P13_2_2_4-3_4_3 | 0.0577866  | 0.0578094  | 0.354885 | 1.64512  |
| sp_P7_P15_1_1_2-4_4_4  | 0.058192   | 0.0582207  | 0.341214 | 1.65879  |
| sp_P11_P11_2_2_4-2_3_3 | 0.0584308  | 0.0584771  | 0.454475 | 1.54553  |
| sp_P11_P11_3_2_3-4_2_2 | 0.0584786  | 0.0584764  | 0.454376 | 1.54562  |
| sp_P11_P18_2_2_4-5_5_5 | 0.0584578  | 0.0584977  | 0.366227 | 1.63377  |
| sp_P14_P16_2_4_5-5_3_5 | 0.0589705  | 0.0589847  | 0.360363 | 1.63964  |
| sp_P13_P14_2_3_5-5_3_3 | 0.0591239  | 0.0591815  | 0.299679 | 1.70032  |
| sp_P9_P14_1_2_3-3_4_4  | 0.0594053  | 0.0594009  | 0.653203 | 1.3468   |
| sp_P12_P12_2_2_5-3_3_3 | 0.0593764  | 0.0594222  | 0.370848 | 1.62915  |
| sp_P12_P12_3_3_3-5_2_2 | 0.0594388  | 0.0594379  | 0.370459 | 1.62954  |
| sp_P9_P12_1_2_3-3_4_2  | 0.0594073  | 0.0594878  | 0.223947 | 1.77605  |
| sp_P13_P15_2_3_5-3_5_4 | 0.0594616  | 0.0596059  | 0.334757 | 1.66524  |
| sp_P11_P12_2_2_4-2_3_4 | 0.0596943  | 0.0596854  | 0.637113 | 1.36289  |
| sp_P13_P14_2_4_4-3_3_5 | 0.0598393  | 0.0598556  | 0.412701 | 1.5873   |
| sp_P8_P12_1_2_2-2_3_4  | 0.0598633  | 0.0598569  | 0.594207 | 1.40579  |
| sp_P11_P15_2_3_3-5_2_5 | 0.0602132  | 0.0603126  | 0.276037 | 1.72396  |
| sp_P13_P17_2_3_5-5_4_5 | 0.0607155  | 0.0606922  | 0.421526 | 1.57847  |
| sp_P11_P14_2_3_3-4_2_5 | 0.0605967  | 0.0607621  | 0.416697 | 1.5833   |
| sp_P11_P13_2_2_4-2_3_5 | 0.0607514  | 0.0607824  | 0.659243 | 1.34076  |
| sp_P12_P16_2_3_4-5_3_5 | 0.0609247  | 0.0609506  | 0.370702 | 1.6293   |
| sp_P11_P13_1_3_4-3_4_3 | 0.0613386  | 0.0613872  | 0.316703 | 1.6833   |
| sp_P12_P12_2_3_4-3_2_4 | 0.0615494  | 0.0615699  | 0.555674 | 1.44433  |

| name                   | $\Delta_l$ | $\Delta_a$ | $c_l$    | $c_a$   |
|------------------------|------------|------------|----------|---------|
| sp_P11_P16_2_2_4-4_5_4 | 0.0615575  | 0.0615809  | 0.395823 | 1.60418 |
| sp_P7_P7_1_1_2-1_2_1   | 0.0615256  | 0.061611   | 0.436516 | 1.56348 |
| sp_P11_P14_2_3_3-2_4_5 | 0.0615907  | 0.0617329  | 0.387198 | 1.6128  |
| sp_P11_P15_1_3_4-3_4_5 | 0.0618275  | 0.061849   | 0.210775 | 1.78923 |
| sp_P13_P16_2_3_5-3_5_5 | 0.0620186  | 0.0620075  | 0.449212 | 1.55079 |
| sp_P8_P12_1_2_2-2_2_5  | 0.0621521  | 0.0621465  | 0.473147 | 1.52685 |
| sp_P11_P14_2_2_4-3_4_4 | 0.0621254  | 0.0621892  | 0.475649 | 1.52435 |
| sp_P8_P15_1_2_2-3_4_5  | 0.0621925  | 0.062179   | 0.528023 | 1.47198 |
| sp_P8_P9_1_2_2-1_2_3   | 0.0623202  | 0.0622885  | 0.622676 | 1.37732 |
| sp_P10_P10_1_3_3-1_3_3 | 0.0408224  | 0.0625087  | 0.380189 | 1.61981 |
| sp_P10_P10_1_2_4-1_2_4 | 0.0625407  | 0.0625336  | 0.213538 | 1.78646 |
| sp_P7_P11_1_1_2-2_2_4  | 0.0626947  | 0.0627088  | 0.458116 | 1.54188 |
| sp_P14_P14_2_4_5-4_5_2 | 0.0627661  | 0.0628987  | 0.282555 | 1.71744 |
| sp_P14_P14_2_4_5-5_2_4 | 0.0628062  | 0.0629017  | 0.28245  | 1.71755 |
| sp_P9_P10_1_2_3-1_2_4  | 0.0629262  | 0.0628805  | 0.510963 | 1.48904 |
| sp_P10_P13_2_2_3-2_5_3 | 0.0631457  | 0.0631838  | 0.341001 | 1.659   |
| sp_P14_P14_3_3_5-4_2_5 | 0.0631981  | 0.0632501  | 0.512732 | 1.48727 |
| sp_P11_P17_2_2_4-4_5_5 | 0.0632616  | 0.0632691  | 0.476268 | 1.52373 |
| sp_P14_P14_2_4_5-3_3_5 | 0.0632605  | 0.0632769  | 0.512265 | 1.48773 |
| sp_P11_P11_2_2_4-2_4_2 | 0.0633311  | 0.0633665  | 0.243443 | 1.75656 |
| sp_P14_P15_2_4_5-4_3_5 | 0.0633714  | 0.0633836  | 0.423499 | 1.5765  |
| sp_P7_P13_1_1_2-3_3_4  | 0.0640441  | 0.0640831  | 0.430132 | 1.56987 |
| sp_P9_P12_1_2_3-2_3_4  | 0.0645104  | 0.0644856  | 0.533472 | 1.46653 |
| sp_P10_P16_2_2_3-3_5_5 | 0.0646166  | 0.0647642  | 0.397063 | 1.60294 |
| sp_P13_P14_2_3_5-3_5_3 | 0.0650321  | 0.0650805  | 0.233474 | 1.76653 |
| sp_P7_P16_1_1_2-4_4_5  | 0.0651264  | 0.0651438  | 0.452176 | 1.54782 |
| sp_P11_P13_1_3_4-3_3_4 | 0.0653003  | 0.0652378  | 0.503625 | 1.49638 |
| sp_P10_P10_1_3_3-3_1_3 | 0.0620308  | 0.0653375  | 0.537032 | 1.46297 |
| sp_P9_P10_2_2_2-1_3_3  | 0.0654865  | 0.0655452  | 0.374346 | 1.62565 |
| sp_P7_P12_1_1_2-2_2_5  | 0.0655541  | 0.0655691  | 0.497106 | 1.50289 |
| sp_P12_P12_1_4_4-3_3_3 | 0.0660963  | 0.0661434  | 0.265998 | 1.734   |
| sp_P12_P12_3_3_3-4_1_4 | 0.0660735  | 0.0661527  | 0.266364 | 1.73364 |
| sp_P11_P11_1_3_4-2_3_3 | 0.0664886  | 0.0664665  | 0.501763 | 1.49824 |
| sp_P11_P11_3_2_3-4_1_3 | 0.0665312  | 0.066472   | 0.501682 | 1.49832 |
| sp_P13_P14_2_3_5-4_3_4 | 0.066586   | 0.0665997  | 0.447658 | 1.55234 |
| sp_P9_P10_1_2_3-2_3_2  | 0.0666837  | 0.0667267  | 0.320187 | 1.67981 |
| sp_P11_P13_1_3_4-2_4_4 | 0.0665722  | 0.0668052  | 0.231525 | 1.76848 |
| sp_P15_P15_2_5_5-4_3_5 | 0.0671631  | 0.06722    | 0.334092 | 1.66591 |
| sp_P15_P15_3_4_5-5_2_5 | 0.0672757  | 0.0672229  | 0.333825 | 1.66618 |

| name                   | $\Delta_l$ | $\Delta_a$ | $c_l$    | $c_a$   |
|------------------------|------------|------------|----------|---------|
| sp_P10_P13_1_3_3-2_3_5 | 0.0676313  | 0.0676578  | 0.297559 | 1.70244 |
| sp_P11_P14_2_2_4-3_5_3 | 0.0685896  | 0.0685985  | 0.344855 | 1.65514 |
| sp_P10_P14_1_3_3-3_3_5 | 0.0688311  | 0.0688626  | 0.400744 | 1.59926 |
| sp_P9_P11_1_2_3-3_2_3  | 0.0688792  | 0.0689261  | 0.509261 | 1.49074 |
| sp_P8_P10_1_2_2-3_1_3  | 0.0688982  | 0.0689267  | 0.480091 | 1.51991 |
| sp_P12_P13_2_3_4-2_5_3 | 0.0695472  | 0.0695864  | 0.332865 | 1.66713 |
| sp_P10_P12_2_2_3-2_5_2 | 0.0694919  | 0.069588   | 0.346252 | 1.65375 |
| sp_P13_P15_3_3_4-2_5_5 | 0.0695105  | 0.0696473  | 0.330545 | 1.66946 |
| sp_P10_P11_2_2_3-3_4_1 | 0.0700011  | 0.0369588  | 0.204174 | 1.79583 |
| sp_P11_P15_2_2_4-3_4_5 | 0.0700022  | 0.0700354  | 0.485912 | 1.51409 |
| sp_P9_P11_1_2_3-2_2_4  | 0.0700382  | 0.070058   | 0.589308 | 1.41069 |
| sp_P12_P12_2_2_5-3_4_2 | 0.0700681  | 0.0701277  | 0.30196  | 1.69804 |
| sp_P12_P12_2_3_4-5_2_2 | 0.0701637  | 0.0701353  | 0.302243 | 1.69776 |
| sp_P9_P14_1_2_3-3_5_3  | 0.0704223  | 0.070401   | 0.458688 | 1.54131 |
| sp_P12_P14_2_3_4-2_5_4 | 0.0711115  | 0.0710862  | 0.466239 | 1.53376 |
| sp_P12_P13_2_3_4-4_2_4 | 0.0719168  | 0.0719279  | 0.420387 | 1.57961 |
| sp_P12_P14_2_2_5-4_4_3 | 0.0720378  | 0.0720752  | 0.352954 | 1.64705 |
| sp_P12_P14_2_3_4-5_2_4 | 0.0719799  | 0.0720884  | 0.319988 | 1.68001 |
| sp_P13_P15_2_3_5-4_3_5 | 0.0721961  | 0.0722303  | 0.522067 | 1.47793 |
| sp_P12_P16_2_2_5-5_5_3 | 0.0725829  | 0.0725787  | 0.344966 | 1.65503 |
| sp_P10_P13_2_2_3-2_4_4 | 0.0728449  | 0.0728689  | 0.443329 | 1.55667 |
| sp_P10_P14_1_3_3-2_4_5 | 0.0728651  | 0.0729001  | 0.518405 | 1.48159 |
| sp_P9_P14_2_2_2-2_4_5  | 0.0728177  | 0.0729069  | 0.347119 | 1.65288 |
| sp_P11_P16_1_3_4-3_5_5 | 0.073052   | 0.0730387  | 0.419755 | 1.58024 |
| sp_P11_P12_1_3_4-2_3_4 | 0.0475304  | 0.0731114  | 0.758578 | 1.24142 |
| sp_P13_P14_2_4_4-4_2_5 | 0.0735912  | 0.0736288  | 0.372329 | 1.62767 |
| sp_P8_P8_1_1_3-2_2_1   | 0.0736232  | 0.0736862  | 0.309743 | 1.69026 |
| sp_P8_P8_1_2_2-3_1_1   | 0.0736662  | 0.0737014  | 0.310096 | 1.6899  |
| sp_P11_P13_2_3_3-3_2_5 | 0.0738476  | 0.0738742  | 0.479592 | 1.52041 |
| sp_P13_P15_2_3_5-5_3_4 | 0.0738547  | 0.0738942  | 0.393819 | 1.60618 |
| sp_P9_P14_1_2_3-3_3_5  | 0.0739711  | 0.0740123  | 0.253819 | 1.74618 |
| sp_P12_P16_2_2_5-4_4_5 | 0.074045   | 0.0740498  | 0.428693 | 1.57131 |
| sp_P9_P15_1_2_3-3_4_5  | 0.0743696  | 0.0743444  | 0.649717 | 1.35028 |
| sp_P11_P12_2_3_3-2_2_5 | 0.0745772  | 0.0746415  | 0.445216 | 1.55478 |
| sp_P12_P15_2_2_5-4_4_4 | 0.0748144  | 0.0748484  | 0.391023 | 1.60898 |
| sp_P12_P13_2_2_5-3_5_2 | 0.0750181  | 0.0751827  | 0.280958 | 1.71904 |
| sp_P8_P13_1_2_2-3_2_5  | 0.0756655  | 0.0756654  | 0.49462  | 1.50538 |
| sp_P14_P14_3_3_5-5_2_4 | 0.0756829  | 0.0756866  | 0.355059 | 1.64494 |
| sp_P9_P9_1_1_4-1_1_4   | 0.075687   | 0.0757066  | 0.587874 | 1.41213 |

| name                   | $\Delta_l$  | $\Delta_a$ | $c_l$    | $c_a$     |
|------------------------|-------------|------------|----------|-----------|
| sp_P14_P14_2_4_5-3_5_3 | 0.0757069   | 0.0757077  | 0.35521  | 1.64479   |
| sp_P12_P14_1_4_4-2_4_5 | 0.0756489   | 0.0757279  | 0.158555 | 1.84144   |
| sp_P12_P15_1_4_4-2_5_5 | 0.076267    | 0.0763807  | 0.251189 | 1.74881   |
| sp_P10_P11_1_2_4-3_3_2 | 0.076496    | 0.0765107  | 0.401087 | 1.59891   |
| sp_P10_P11_1_2_4-2_3_3 | 0.077732    | 0.077773   | 0.476866 | 1.52313   |
| sp_P7_P14_1_1_2-3_3_5  | 0.0778553   | 0.077862   | 0.423091 | 1.57691   |
| sp_P11_P15_2_2_4-3_5_4 | 0.0781819   | 0.0782665  | 0.474208 | 1.52579   |
| sp_P12_P15_2_3_4-2_5_5 | 0.0785154   | 0.0785367  | 0.457992 | 1.54201   |
| sp_P12_P13_1_4_4-3_3_4 | 0.0787162   | 0.0787959  | 0.371875 | 1.62813   |
| sp_P11_P11_2_3_3-3_1_4 | 0.0789384   | 0.0789064  | 0.485854 | 1.51415   |
| sp_P11_P15_2_3_3-2_5_5 | 0.0789735   | 0.0789978  | 0.339522 | 1.66048   |
| sp_P12_P12_4_2_3-5_2_2 | 0.0790469   | 0.0790842  | 0.508067 | 1.49193   |
| sp_P12_P12_2_2_5-2_3_4 | 0.0790383   | 0.0790897  | 0.50792  | 1.49208   |
| sp_P11_P12_1_3_4-2_4_3 | 0.0793959   | 0.0794371  | 0.408708 | 1.59129   |
| sp_P9_P12_1_2_3-2_2_5  | 0.0795865   | 0.0795515  | 0.529495 | 1.47051   |
| sp_P11_P14_1_3_4-2_5_4 | 0.0797888   | 0.0798326  | 0.456898 | 1.5431    |
| sp_P14_P15_2_4_5-5_2_5 | 0.0799666   | 0.0799672  | 0.34027  | 1.65973   |
| sp_P11_P14_1_3_4-3_3_5 | 0.0799916   | 0.0799369  | 0.561497 | 1.4385    |
| sp_P11_P16_2_2_4-3_5_5 | 0.0804017   | 0.0804301  | 0.541303 | 1.4587    |
| sp_P9_P9_1_2_3-1_3_2   | 0.0811114   | 0.0811955  | 0.389164 | 1.61084   |
| sp_P13_P13_2_3_5-3_5_2 | 0.0812673   | 0.081219   | 0.294671 | 1.70533   |
| sp_P13_P13_2_3_5-5_2_3 | 0.0812575   | 0.0812758  | 0.294975 | 1.70502   |
| sp_P12_P17_2_2_5-5_5_4 | 0.0811423   | 0.0812767  | 0.372764 | 1.62724   |
| sp_P9_P10_1_2_3-1_3_3  | 0.0814396   | 0.0814103  | 0.703114 | 1.29689   |
| sp_P8_P13_1_2_2-2_3_5  | 0.0814325   | 0.0815031  | 0.464554 | 1.53545   |
| sp_P12_P15_2_2_5-4_5_3 | 0.0814944   | 0.081525   | 0.357814 | 1.64219   |
| sp_P10_P12_1_2_4-3_4_2 | 0.0815504   | 0.0815201  | 0.321485 | 1.67851   |
| sp_P9_P13_1_2_3-2_3_5  | 0.081709    | 0.0817695  | 0.485565 | 1.51443   |
| sp_P14_P15_3_3_5-2_5_5 | 0.0817687   | 0.0818186  | 0.41579  | 1.58421   |
| sp_P7_P11_1_1_2-2_3_3  | 0.0821263   | 0.0821688  | 0.496292 | 1.50371   |
| sp_P10_P11_1_3_3-1_3_4 | 0.0821473   | 0.0821982  | 0.366077 | 1.63392   |
| sp_P11_P12_1_3_4-3_4_2 | 0.0823365   | 0.0824902  | 0.315917 | 1.68408   |
| sp_P12_P13_2_2_5-3_4_3 | 0.0824723   | 0.0825292  | 0.389683 | 1.61032   |
| sp_P7_P8_1_1_2-1_2_2   | 0.0827987   | 0.0827626  | 0.652006 | 1.34799   |
| sp_P13_P13_2_3_5-2_5_3 | 0.0828879   | 0.08291    | 0.286725 | 1.71327   |
| sp_P12_P18_2_2_5-5_5_5 | 0.082911    | 0.0829155  | 0.404414 | 1.59559   |
| sp_P12_P13_2_2_5-2_3_5 | 0.0831328   | 0.0831481  | 0.654701 | 1.3453    |
| sp_P12_P13_2_3_4-3_5_2 | 0.0831187   | 0.0831546  | 0.37386  | 1.62614   |
| sp_P11_P11_1_3_4-1_3_4 | 0.000199894 | 0.0833454  | 1.97049  | 0.0295121 |

| name                   | $\Delta_l$ | $\Delta_a$ | $c_l$    | $c_a$   |
|------------------------|------------|------------|----------|---------|
| sp_P11_P11_1_3_4-1_4_3 | 0.0803067  | 0.0833507  | 0.320354 | 1.67965 |
| sp_P9_P9_1_2_3-3_1_2   | 0.0833723  | 0.0834282  | 0.41321  | 1.58679 |
| sp_P9_P9_1_2_3-2_3_1   | 0.0834374  | 0.0834146  | 0.41318  | 1.58682 |
| sp_P9_P15_2_2_2-2_5_5  | 0.0835519  | 0.0835733  | 0.284274 | 1.71573 |
| sp_P10_P10_1_3_3-2_2_3 | 0.0836442  | 0.0836438  | 0.529954 | 1.47005 |
| sp_P10_P10_2_2_3-3_1_3 | 0.0836607  | 0.0836138  | 0.529386 | 1.47061 |
| sp_P12_P14_2_2_5-3_4_4 | 0.0836098  | 0.0836645  | 0.485601 | 1.5144  |
| sp_P10_P12_1_2_4-3_3_3 | 0.0835957  | 0.0836731  | 0.529491 | 1.47051 |
| sp_P8_P16_1_2_2-3_5_5  | 0.0837926  | 0.083802   | 0.506224 | 1.49378 |
| sp_P13_P14_2_3_5-2_5_4 | 0.0837427  | 0.0838257  | 0.437953 | 1.56205 |
| sp_P13_P16_2_3_5-5_3_5 | 0.0840301  | 0.083972   | 0.452509 | 1.54749 |
| sp_P9_P12_1_2_3-2_4_3  | 0.0842476  | 0.0843546  | 0.552225 | 1.44778 |
| sp_P11_P12_2_3_3-1_4_4 | 0.0842312  | 0.0843765  | 0.385512 | 1.61449 |
| sp_P12_P12_3_2_4-4_1_4 | 0.0845743  | 0.0845919  | 0.528528 | 1.47147 |
| sp_P12_P12_1_4_4-2_3_4 | 0.0846002  | 0.0846079  | 0.52802  | 1.47198 |
| sp_P10_P14_2_2_3-2_5_4 | 0.0847599  | 0.0848079  | 0.369982 | 1.63002 |
| sp_P10_P10_1_2_4-2_3_2 | 0.0849395  | 0.0849423  | 0.408924 | 1.59108 |
| sp_P10_P10_2_2_3-4_1_2 | 0.0848494  | 0.084947   | 0.408894 | 1.59111 |
| sp_P6_P9_1_1_1-1_2_3   | 0.0850007  | 0.0850108  | 0.612416 | 1.38758 |
| sp_P9_P12_1_2_3-3_2_4  | 0.0852198  | 0.0852015  | 0.643964 | 1.35604 |
| sp_P12_P17_2_2_5-4_5_5 | 0.0854569  | 0.0854441  | 0.503452 | 1.49655 |
| sp_P13_P15_2_3_5-2_5_5 | 0.0857129  | 0.0854409  | 0.537032 | 1.46297 |
| sp_P11_P12_2_2_4-2_4_3 | 0.0857593  | 0.0857594  | 0.43254  | 1.56746 |
| sp_P12_P13_2_3_4-3_2_5 | 0.0857564  | 0.0857767  | 0.584125 | 1.41588 |
| sp_P10_P14_2_2_3-2_4_5 | 0.0856771  | 0.085812   | 0.430695 | 1.5693  |
| sp_P8_P13_1_2_2-2_4_4  | 0.0871321  | 0.0871414  | 0.552738 | 1.44726 |
| sp_P12_P14_2_3_4-4_2_5 | 0.0871201  | 0.0872434  | 0.474394 | 1.52561 |
| sp_P11_P13_2_2_4-2_4_4 | 0.0877071  | 0.0877047  | 0.586588 | 1.41341 |
| sp_P12_P16_2_2_5-4_5_4 | 0.0876868  | 0.0877086  | 0.425611 | 1.57439 |
| sp_P8_P10_1_1_3-2_2_3  | 0.0877816  | 0.0878286  | 0.608229 | 1.39177 |
| sp_P10_P15_1_3_3-2_5_5 | 0.0877932  | 0.0878411  | 0.549537 | 1.45046 |
| sp_P8_P9_1_1_3-2_2_2   | 0.0889598  | 0.0889776  | 0.465776 | 1.53422 |
| sp_P11_P12_2_2_4-2_5_2 | 0.088782   | 0.0890751  | 0.301509 | 1.69849 |
| sp_P8_P10_1_2_2-1_3_3  | 0.089207   | 0.0892631  | 0.649571 | 1.35043 |
| sp_P9_P11_2_2_2-1_3_4  | 0.0897231  | 0.0897433  | 0.417311 | 1.58269 |
| sp_P9_P10_2_2_2-1_2_4  | 0.0898646  | 0.0898949  | 0.617382 | 1.38262 |
| sp_P9_P15_1_2_3-3_5_4  | 0.0897564  | 0.0899682  | 0.586642 | 1.41336 |
| sp_P11_P14_1_3_4-2_4_5 | 0.0900784  | 0.0901281  | 0.216618 | 1.78338 |
| sp_P11_P14_1_3_4-3_5_3 | 0.0899687  | 0.0901705  | 0.328895 | 1.6711  |

| name                   | $\Delta_l$ | $\Delta_a$ | $c_l$    | $c_a$   |
|------------------------|------------|------------|----------|---------|
| sp_P12_P15_2_3_4-5_2_5 | 0.0902768  | 0.0903176  | 0.35966  | 1.64034 |
| sp_P10_P10_3_1_3-4_1_2 | 0.0903933  | 0.0904136  | 0.593407 | 1.40659 |
| sp_P10_P10_1_2_4-1_3_3 | 0.0903308  | 0.0904225  | 0.594599 | 1.4054  |
| sp_P10_P12_1_2_4-2_3_4 | 0.090723   | 0.0906952  | 0.400846 | 1.59915 |
| sp_P8_P10_1_2_2-1_2_4  | 0.0912003  | 0.0912322  | 0.516336 | 1.48366 |
| sp_P13_P13_2_3_5-3_2_5 | 0.0914589  | 0.0914642  | 0.67722  | 1.32278 |
| sp_P9_P13_1_2_3-3_5_2  | 0.0914253  | 0.0915833  | 0.294216 | 1.70578 |
| sp_P11_P13_1_3_4-2_5_3 | 0.0922085  | 0.0922299  | 0.343971 | 1.65603 |
| sp_P10_P12_1_3_3-3_2_4 | 0.0923485  | 0.0924366  | 0.439618 | 1.56038 |
| sp_P10_P13_1_2_4-3_5_2 | 0.0923938  | 0.0924962  | 0.262939 | 1.73706 |
| sp_P12_P15_2_2_5-3_4_5 | 0.0928929  | 0.0929518  | 0.504833 | 1.49517 |
| sp_P9_P13_1_2_3-2_4_4  | 0.0932352  | 0.0932661  | 0.672694 | 1.32731 |
| sp_P14_P14_2_4_5-4_2_5 | 0.0936468  | 0.0937355  | 0.411542 | 1.58846 |
| sp_P10_P14_1_2_4-3_4_4 | 0.0936295  | 0.0937828  | 0.529593 | 1.47041 |
| sp_P10_P13_1_2_4-3_4_3 | 0.09381    | 0.0937971  | 0.407318 | 1.59268 |
| sp_P8_P11_1_1_3-3_3_2  | 0.0941103  | 0.0941219  | 0.374421 | 1.62558 |
| sp_P10_P11_1_2_4-2_2_4 | 0.0948444  | 0.0948774  | 0.866333 | 1.13367 |
| sp_P10_P13_1_2_4-3_3_4 | 0.0952339  | 0.0952882  | 0.544919 | 1.45508 |
| sp_P10_P11_2_2_3-1_4_3 | 0.0954221  | 0.0954704  | 0.389301 | 1.6107  |
| sp_P10_P10_2_2_3-4_2_1 | 0.0959021  | 0.0959084  | 0.487183 | 1.51282 |
| sp_P10_P10_1_2_4-3_2_2 | 0.0958776  | 0.095916   | 0.487293 | 1.51271 |
| sp_P8_P11_1_1_3-2_2_4  | 0.0960228  | 0.0960097  | 0.618463 | 1.38154 |
| sp_P9_P11_1_2_3-2_4_2  | 0.095942   | 0.0960456  | 0.328584 | 1.67142 |
| sp_P8_P9_1_2_2-2_1_3   | 0.0962263  | 0.0962483  | 0.594225 | 1.40577 |
| sp_P12_P13_1_4_4-2_3_5 | 0.0965791  | 0.0964744  | 0.51265  | 1.48735 |
| sp_P12_P14_2_2_5-3_5_3 | 0.0969458  | 0.0969975  | 0.385932 | 1.61407 |
| sp_P9_P16_1_2_3-3_5_5  | 0.0971041  | 0.0970943  | 0.621165 | 1.37884 |
| sp_P11_P13_2_2_4-2_5_3 | 0.0971614  | 0.0973067  | 0.386814 | 1.61319 |
| sp_P10_P10_3_2_2-4_1_2 | 0.0973416  | 0.0973316  | 0.755955 | 1.24405 |
| sp_P10_P10_1_2_4-2_2_3 | 0.09736    | 0.0973842  | 0.755543 | 1.24446 |
| sp_P12_P12_2_2_5-2_5_2 | 0.0981442  | 0.0982079  | 0.269412 | 1.73059 |
| sp_P8_P11_1_2_2-3_1_4  | 0.0983726  | 0.0983836  | 0.510509 | 1.48949 |
| sp_P7_P9_1_1_2-1_2_3   | 0.0983816  | 0.0984326  | 0.729712 | 1.27029 |
| sp_P11_P13_1_3_4-2_3_5 | 0.0987102  | 0.0987428  | 0.331557 | 1.66844 |
| sp_P11_P12_1_3_4-1_4_4 | 0.0988162  | 0.0989489  | 0.326334 | 1.67367 |
| sp_P9_P11_1_2_3-1_3_4  | 0.0989755  | 0.0984807  | 0.707373 | 1.29263 |
| sp_P13_P13_2_4_4-3_2_5 | 0.0992937  | 0.0992011  | 0.473423 | 1.52658 |
| sp_P13_P13_2_3_5-4_2_4 | 0.0992942  | 0.0992717  | 0.472773 | 1.52723 |
| sp_P7_P9_1_1_2-1_3_2   | 0.0995544  | 0.0995825  | 0.521958 | 1.47804 |



| name                   | $\Delta_l$ | $\Delta_a$ | $c_l$     | $c_a$   |
|------------------------|------------|------------|-----------|---------|
| sp_P6_P11_1_1_1-2_2_4  | 0.0997036  | 0.0146121  | 0.0389045 | 1.9611  |
| sp_P11_P14_2_2_4-2_4_5 | 0.0999632  | 0.0999652  | 0.577252  | 1.42275 |
| sp_P7_P12_1_1_2-2_3_4  | 0.0999915  | 0.0999906  | 0.436516  | 1.56348 |

### 3 Regular Ato P-cages

| name                    | name                    |
|-------------------------|-------------------------|
| Ato_P6_P10_1_1_1-1_3_3  | Ato_P6_P15_1_1_1-2_5_5  |
| Ato_P8_P8_1_2_2-1_2_2   | Ato_P9_P10_2_2_2-1_3_3  |
| Ato_P9_P15_2_2_2-2_5_5  | Ato_P10_P12_1_3_3-3_3_3 |
| Ato_P11_P11_2_3_3-2_3_3 | Ato_P12_P12_2_3_4-2_3_4 |
| Ato_P12_P15_3_3_3-2_5_5 | Ato_P14_P14_3_4_4-3_4_4 |
| Ato_P15_P15_2_5_5-4_4_4 | Ato_P15_P18_2_5_5-5_5_5 |
| Ato_P16_P16_3_5_5-3_5_5 | Ato_P17_P17_4_5_5-4_5_5 |

## 4 Near Miss Ato P-cages

| name                    | $\Delta_l$               | $\Delta_a$               | $c_l$    | $c_a$   |
|-------------------------|--------------------------|--------------------------|----------|---------|
| Ato_P13_P17_2_4_4-4_5_5 | $6.65962 \times 10^{-5}$ | $6.66117 \times 10^{-5}$ | 0.254822 | 1.74518 |
| Ato_P14_P16_3_4_4-3_5_5 | 0.000169789              | 0.000169581              | 0.216037 | 1.78396 |
| Ato_P15_P15_3_4_5-3_4_5 | 0.000307683              | 0.000305448              | 0.264743 | 1.73526 |
| Ato_P15_P15_3_5_4-3_5_4 | 0.000307966              | 0.000305748              | 0.264131 | 1.73587 |
| Ato_P8_P14_1_2_2-3_4_4  | 0.000310204              | 0.000310266              | 0.371251 | 1.62875 |
| Ato_P15_P15_3_4_5-3_5_4 | 0.00109914               | 0.00110007               | 0.240761 | 1.75924 |
| Ato_P16_P17_3_5_5-4_5_5 | 0.00142859               | 0.00142959               | 0.16163  | 1.83837 |
| Ato_P13_P18_2_4_4-5_5_5 | 0.00309878               | 0.00310183               | 0.166743 | 1.83326 |
| Ato_P11_P11_2_2_4-2_4_2 | 0.00372714               | 0.00372718               | 0.296599 | 1.7034  |
| Ato_P9_P10_2_1_3-1_4_2  | 0.00494106               | 0.00494167               | 0.483622 | 1.51638 |
| Ato_P9_P10_2_3_1-1_2_4  | 0.0049399                | 0.00494178               | 0.483558 | 1.51644 |
| Ato_P13_P14_2_4_4-3_4_4 | 0.00542294               | 0.00542392               | 0.257654 | 1.74235 |
| Ato_P14_P16_2_4_5-4_5_4 | 0.00559556               | 0.00559964               | 0.272475 | 1.72752 |
| Ato_P13_P14_3_4_3-2_4_5 | 0.00670117               | 0.00671178               | 0.212409 | 1.78759 |
| Ato_P13_P14_3_3_4-2_5_4 | 0.0067135                | 0.00671432               | 0.212446 | 1.78755 |
| Ato_P11_P15_2_3_3-4_4_4 | 0.0067292                | 0.0067282                | 0.298846 | 1.70115 |
| Ato_P11_P14_2_3_3-3_4_4 | 0.00694885               | 0.00695408               | 0.240498 | 1.7595  |
| Ato_P11_P16_2_3_3-3_5_5 | 0.00716165               | 0.0071714                | 0.264747 | 1.73525 |
| Ato_P8_P11_1_2_2-2_3_3  | 0.00734176               | 0.00734219               | 0.422322 | 1.57768 |
| Ato_P10_P14_1_3_3-3_4_4 | 0.00748225               | 0.00748217               | 0.291114 | 1.70889 |
| Ato_P8_P12_1_2_2-3_3_3  | 0.00763471               | 0.00763782               | 0.314839 | 1.68516 |
| Ato_P10_P12_2_2_3-2_4_3 | 0.00805869               | 0.00806822               | 0.334831 | 1.66517 |
| Ato_P10_P12_2_3_2-2_3_4 | 0.00806786               | 0.00807178               | 0.334911 | 1.66509 |

| name                    | $\Delta_l$ | $\Delta_a$ | $c_l$    | $c_a$   |
|-------------------------|------------|------------|----------|---------|
| Ato_P14_P17_3_4_4-4_5_5 | 0.00812437 | 0.00812483 | 0.230969 | 1.76903 |
| Ato_P11_P12_2_3_3-2_4_3 | 0.00944402 | 0.00944317 | 0.425451 | 1.57455 |
| Ato_P11_P12_2_3_3-2_3_4 | 0.009437   | 0.00944588 | 0.425846 | 1.57415 |
| Ato_P14_P18_3_4_4-5_5_5 | 0.00974873 | 0.00976888 | 0.255501 | 1.7445  |
| Ato_P13_P15_2_4_4-4_4_4 | 0.0107409  | 0.0107266  | 0.201162 | 1.79884 |
| Ato_P16_P18_3_5_5-5_5_5 | 0.0109787  | 0.0110149  | 0.18754  | 1.81246 |
| Ato_P9_P10_1_2_3-2_3_2  | 0.0122958  | 0.0123064  | 0.360767 | 1.63923 |
| Ato_P9_P10_1_3_2-2_2_3  | 0.0122998  | 0.0123075  | 0.35987  | 1.64013 |
| Ato_P17_P18_4_5_5-5_5_5 | 0.0123174  | 0.0123288  | 0.209245 | 1.79075 |
| Ato_P13_P14_2_3_5-3_5_3 | 0.0123433  | 0.0123505  | 0.231716 | 1.76828 |
| Ato_P13_P14_2_5_3-3_3_5 | 0.012354   | 0.0123547  | 0.231415 | 1.76859 |
| Ato_P15_P16_3_4_5-3_5_5 | 0.0125105  | 0.0125173  | 0.326752 | 1.67325 |
| Ato_P15_P16_3_5_4-3_5_5 | 0.0124969  | 0.0125192  | 0.3269   | 1.6731  |
| Ato_P12_P13_2_3_4-3_4_3 | 0.0125499  | 0.0125541  | 0.261375 | 1.73863 |
| Ato_P12_P13_2_4_3-3_3_4 | 0.0125552  | 0.0125473  | 0.261431 | 1.73857 |
| Ato_P12_P13_2_2_5-3_5_2 | 0.0129624  | 0.0129635  | 0.347225 | 1.65278 |
| Ato_P12_P13_2_5_2-3_2_5 | 0.0129599  | 0.0129693  | 0.347614 | 1.65239 |
| Ato_P12_P15_2_3_4-3_5_4 | 0.0129979  | 0.0129969  | 0.279081 | 1.72092 |
| Ato_P12_P15_2_4_3-3_4_5 | 0.0129947  | 0.0129988  | 0.27912  | 1.72088 |
| Ato_P12_P12_2_4_3-2_4_3 | 0.0130408  | 0.0130456  | 0.436516 | 1.56348 |
| Ato_P11_P12_2_3_3-3_3_3 | 0.013309   | 0.0133118  | 0.30034  | 1.69966 |
| Ato_P13_P16_3_3_4-3_5_5 | 0.0134468  | 0.0134553  | 0.316527 | 1.68347 |
| Ato_P13_P16_3_4_3-3_5_5 | 0.0134403  | 0.0134565  | 0.316145 | 1.68385 |
| Ato_P14_P15_3_4_4-3_4_5 | 0.0138056  | 0.013853   | 0.241074 | 1.75893 |
| Ato_P15_P17_2_5_5-4_5_5 | 0.0139118  | 0.013912   | 0.204222 | 1.79578 |
| Ato_P12_P13_3_4_2-2_3_5 | 0.0146344  | 0.0146438  | 0.300294 | 1.69971 |
| Ato_P12_P13_3_2_4-2_5_3 | 0.014627   | 0.0146554  | 0.300411 | 1.69959 |
| Ato_P12_P16_2_3_4-4_5_4 | 0.0147617  | 0.0147855  | 0.294407 | 1.70559 |
| Ato_P12_P16_2_4_3-4_4_5 | 0.0147625  | 0.0147959  | 0.293838 | 1.70616 |
| Ato_P8_P13_1_1_3-3_5_2  | 0.0152268  | 0.0152273  | 0.402556 | 1.59744 |
| Ato_P8_P13_1_3_1-3_2_5  | 0.0152005  | 0.0152277  | 0.402461 | 1.59754 |
| Ato_P11_P17_2_3_3-4_5_5 | 0.0154488  | 0.0154616  | 0.254984 | 1.74502 |
| Ato_P10_P14_2_3_2-2_4_5 | 0.0156161  | 0.0156232  | 0.358105 | 1.6419  |
| Ato_P10_P14_2_2_3-2_5_4 | 0.0156242  | 0.0156193  | 0.357335 | 1.64266 |
| Ato_P13_P13_2_4_4-2_4_4 | 0.0156456  | 0.0156424  | 0.237649 | 1.76235 |
| Ato_P15_P17_3_5_4-4_5_5 | 0.0159604  | 0.0159683  | 0.266494 | 1.73351 |
| Ato_P13_P16_2_4_4-3_5_5 | 0.016688   | 0.0166959  | 0.382991 | 1.61701 |
| Ato_P11_P14_2_2_4-3_5_3 | 0.0167828  | 0.0167904  | 0.322206 | 1.67779 |
| Ato_P11_P14_2_4_2-3_3_5 | 0.0167803  | 0.0167983  | 0.321669 | 1.67833 |

| name                    | $\Delta_l$ | $\Delta_a$ | $c_l$    | $c_a$   |
|-------------------------|------------|------------|----------|---------|
| Ato_P13_P15_2_3_5-4_5_3 | 0.0168701  | 0.0168664  | 0.238122 | 1.76188 |
| Ato_P13_P15_2_5_3-4_3_5 | 0.0168415  | 0.0168812  | 0.239096 | 1.7609  |
| Ato_P11_P13_2_3_3-2_4_4 | 0.0170281  | 0.0170738  | 0.291276 | 1.70872 |
| Ato_P12_P13_3_3_3-2_4_4 | 0.0170762  | 0.0170756  | 0.244265 | 1.75573 |
| Ato_P9_P13_1_2_3-3_4_3  | 0.0171526  | 0.0171715  | 0.509355 | 1.49064 |
| Ato_P9_P13_1_3_2-3_3_4  | 0.0171753  | 0.0171766  | 0.509161 | 1.49084 |
| Ato_P14_P17_2_5_4-5_4_5 | 0.0172149  | 0.0172308  | 0.211625 | 1.78838 |
| Ato_P14_P17_2_4_5-5_5_4 | 0.017211   | 0.0172344  | 0.212032 | 1.78797 |
| Ato_P12_P12_2_3_4-2_4_3 | 0.0180602  | 0.0180732  | 0.254541 | 1.74546 |
| Ato_P7_P13_1_1_2-2_5_3  | 0.018215   | 0.018253   | 0.244134 | 1.75587 |
| Ato_P7_P13_1_2_1-2_3_5  | 0.0182616  | 0.0182557  | 0.243916 | 1.75608 |
| Ato_P12_P12_1_4_4-3_3_3 | 0.0183214  | 0.018345   | 0.238877 | 1.76112 |
| Ato_P15_P17_2_5_5-5_5_4 | 0.0184019  | 0.0184123  | 0.279109 | 1.72089 |
| Ato_P15_P17_2_5_5-5_4_5 | 0.0184174  | 0.0184324  | 0.280848 | 1.71915 |
| Ato_P16_P16_3_5_5-4_5_4 | 0.0187196  | 0.018714   | 0.215393 | 1.78461 |
| Ato_P16_P16_3_5_5-4_4_5 | 0.0187039  | 0.0187252  | 0.215964 | 1.78404 |
| Ato_P10_P12_1_2_4-3_4_2 | 0.0187503  | 0.0187699  | 0.503218 | 1.49678 |
| Ato_P10_P12_1_4_2-3_2_4 | 0.0187783  | 0.0187779  | 0.502804 | 1.4972  |
| Ato_P10_P13_2_3_2-2_3_5 | 0.0187845  | 0.0188026  | 0.331565 | 1.66844 |
| Ato_P10_P13_2_2_3-2_5_3 | 0.0187749  | 0.0188035  | 0.331064 | 1.66894 |
| Ato_P9_P13_2_2_2-2_4_4  | 0.0188273  | 0.0188421  | 0.297667 | 1.70233 |
| Ato_P11_P18_2_3_3-5_5_5 | 0.018809   | 0.0188575  | 0.329035 | 1.67097 |
| Ato_P10_P12_2_1_4-2_5_2 | 0.019044   | 0.0190446  | 0.379926 | 1.62007 |
| Ato_P10_P12_2_4_1-2_2_5 | 0.0190151  | 0.0190485  | 0.379717 | 1.62028 |
| Ato_P8_P9_1_2_2-2_2_2   | 0.0190406  | 0.0190521  | 0.313796 | 1.6862  |
| Ato_P10_P15_2_2_3-3_5_4 | 0.0190983  | 0.0190978  | 0.334327 | 1.66567 |
| Ato_P10_P15_2_3_2-3_4_5 | 0.0191134  | 0.019114   | 0.333791 | 1.66621 |
| Ato_P13_P15_3_3_4-3_5_4 | 0.0190995  | 0.0191484  | 0.252861 | 1.74714 |
| Ato_P13_P15_3_4_3-3_4_5 | 0.0191112  | 0.0191539  | 0.252693 | 1.74731 |
| Ato_P6_P13_1_1_1-2_4_4  | 0.019743   | 0.0197359  | 0.573341 | 1.42666 |
| Ato_P11_P15_2_3_3-3_4_5 | 0.0200317  | 0.0200343  | 0.246318 | 1.75368 |
| Ato_P11_P15_2_3_3-3_5_4 | 0.020018   | 0.0200398  | 0.246282 | 1.75372 |
| Ato_P14_P15_2_5_4-4_3_5 | 0.0202198  | 0.0202396  | 0.301643 | 1.69836 |
| Ato_P14_P15_3_3_5-3_5_4 | 0.0202006  | 0.0202458  | 0.247469 | 1.75253 |
| Ato_P14_P15_2_4_5-4_5_3 | 0.0201655  | 0.0202477  | 0.302125 | 1.69787 |
| Ato_P14_P15_3_5_3-3_4_5 | 0.0202048  | 0.0202553  | 0.247649 | 1.75235 |
| Ato_P16_P16_4_5_4-4_5_4 | 0.0204125  | 0.0204174  | 0.233739 | 1.76626 |
| Ato_P12_P14_2_3_4-3_5_3 | 0.0204571  | 0.0204574  | 0.348392 | 1.65161 |
| Ato_P12_P14_2_4_3-3_3_5 | 0.02047    | 0.0204661  | 0.349013 | 1.65099 |

| name                    | $\Delta_l$ | $\Delta_a$ | $c_l$    | $c_a$   |
|-------------------------|------------|------------|----------|---------|
| Ato_P16_P16_4_4_5-4_4_5 | 0.0205086  | 0.0205163  | 0.234422 | 1.76558 |
| Ato_P9_P12_2_2_2-1_4_4  | 0.0206643  | 0.0206793  | 0.306539 | 1.69346 |
| Ato_P13_P16_2_4_4-4_5_4 | 0.0208065  | 0.0208178  | 0.30202  | 1.69798 |
| Ato_P13_P16_2_4_4-4_4_5 | 0.0208233  | 0.0208282  | 0.302221 | 1.69778 |
| Ato_P14_P14_2_4_5-4_4_3 | 0.0210101  | 0.0210141  | 0.239509 | 1.76049 |
| Ato_P14_P14_2_5_4-4_3_4 | 0.0209178  | 0.0210284  | 0.240077 | 1.75992 |
| Ato_P12_P12_2_2_5-2_5_2 | 0.0211593  | 0.0211585  | 0.275869 | 1.72413 |
| Ato_P11_P13_2_2_4-2_5_3 | 0.0211807  | 0.0212324  | 0.32385  | 1.67615 |
| Ato_P11_P13_2_4_2-2_3_5 | 0.0212114  | 0.0212327  | 0.32456  | 1.67544 |
| Ato_P8_P11_2_2_1-1_3_4  | 0.0213034  | 0.0213023  | 0.241195 | 1.7588  |
| Ato_P8_P11_2_1_2-1_4_3  | 0.0213196  | 0.0213199  | 0.241578 | 1.75842 |
| Ato_P7_P12_1_1_2-2_4_3  | 0.021364   | 0.0213571  | 0.337752 | 1.66225 |
| Ato_P7_P12_1_2_1-2_3_4  | 0.0213481  | 0.0213697  | 0.338129 | 1.66187 |
| Ato_P8_P10_1_3_1-2_1_4  | 0.0213876  | 0.0214151  | 0.539588 | 1.46041 |
| Ato_P8_P10_1_1_3-2_4_1  | 0.0214225  | 0.0214215  | 0.539855 | 1.46014 |
| Ato_P11_P16_2_3_3-5_4_4 | 0.0214173  | 0.0214417  | 0.313697 | 1.6863  |
| Ato_P15_P16_3_5_4-4_4_5 | 0.0216023  | 0.0215966  | 0.244951 | 1.75505 |
| Ato_P15_P16_3_4_5-4_5_4 | 0.0215424  | 0.0216195  | 0.245508 | 1.75449 |
| Ato_P15_P16_2_5_5-5_4_4 | 0.021883   | 0.0218825  | 0.21791  | 1.78209 |
| Ato_P10_P16_2_2_3-3_5_5 | 0.0219721  | 0.0219823  | 0.481632 | 1.51837 |
| Ato_P10_P16_2_3_2-3_5_5 | 0.0219733  | 0.021985   | 0.481408 | 1.51859 |
| Ato_P15_P16_2_5_5-4_4_5 | 0.0219969  | 0.0220489  | 0.289132 | 1.71087 |
| Ato_P15_P16_2_5_5-4_5_4 | 0.0220558  | 0.0220551  | 0.289364 | 1.71064 |
| Ato_P15_P16_4_4_4-3_5_5 | 0.0220645  | 0.0220706  | 0.218776 | 1.78122 |
| Ato_P9_P14_1_2_3-3_5_3  | 0.0221057  | 0.0221201  | 0.272493 | 1.72751 |
| Ato_P9_P14_1_3_2-3_3_5  | 0.0221021  | 0.0221219  | 0.272544 | 1.72746 |
| Ato_P10_P13_1_2_4-3_5_2 | 0.0221301  | 0.0221296  | 0.305359 | 1.69464 |
| Ato_P10_P13_1_4_2-3_2_5 | 0.0220838  | 0.0221397  | 0.304889 | 1.69511 |
| Ato_P14_P15_3_4_4-2_5_5 | 0.0222231  | 0.0222393  | 0.214841 | 1.78516 |
| Ato_P15_P18_3_5_4-5_5_5 | 0.0226499  | 0.0226652  | 0.307769 | 1.69223 |
| Ato_P15_P18_3_4_5-5_5_5 | 0.0226582  | 0.0226717  | 0.307915 | 1.69208 |
| Ato_P14_P18_2_4_5-5_5_5 | 0.0229479  | 0.0229617  | 0.304014 | 1.69599 |
| Ato_P14_P18_2_5_4-5_5_5 | 0.0229546  | 0.0229744  | 0.304371 | 1.69563 |
| Ato_P18_P18_5_5_5-5_5_5 | 0.0230891  | 0.0230955  | 0.234503 | 1.7655  |
| Ato_P10_P11_2_2_3-2_3_3 | 0.0234413  | 0.0234468  | 0.419688 | 1.58031 |
| Ato_P10_P11_2_3_2-2_3_3 | 0.0234174  | 0.0234469  | 0.419669 | 1.58033 |
| Ato_P14_P15_2_5_4-4_4_4 | 0.0234829  | 0.0234854  | 0.30042  | 1.69958 |
| Ato_P14_P15_2_4_5-4_4_4 | 0.0234736  | 0.0234965  | 0.300988 | 1.69901 |
| Ato_P14_P16_3_3_5-3_5_5 | 0.0234852  | 0.0235052  | 0.47069  | 1.52931 |

| name                    | $\Delta_l$ | $\Delta_a$ | $c_l$    | $c_a$   |
|-------------------------|------------|------------|----------|---------|
| Ato_P14_P16_3_5_3-3_5_5 | 0.0235126  | 0.0235087  | 0.470148 | 1.52985 |
| Ato_P13_P15_3_4_3-3_5_4 | 0.0236723  | 0.0237021  | 0.241327 | 1.75867 |
| Ato_P13_P15_3_3_4-3_4_5 | 0.0236682  | 0.0237072  | 0.241294 | 1.75871 |
| Ato_P14_P15_2_5_4-3_4_5 | 0.0240145  | 0.0240675  | 0.217483 | 1.78252 |
| Ato_P14_P15_2_4_5-3_5_4 | 0.0240577  | 0.0240741  | 0.217641 | 1.78236 |
| Ato_P15_P15_4_4_4-4_4_4 | 0.0241602  | 0.0241882  | 0.264981 | 1.73502 |
| Ato_P14_P15_4_4_3-2_5_5 | 0.0243694  | 0.0243797  | 0.253462 | 1.74654 |
| Ato_P14_P15_4_3_4-2_5_5 | 0.0244044  | 0.0243889  | 0.253216 | 1.74678 |
| Ato_P15_P16_2_5_5-3_5_5 | 0.024426   | 0.0244043  | 0.28381  | 1.71619 |
| Ato_P13_P13_2_4_4-3_3_4 | 0.024894   | 0.0248858  | 0.271594 | 1.72841 |
| Ato_P13_P13_2_4_4-3_4_3 | 0.024847   | 0.0248984  | 0.271379 | 1.72862 |
| Ato_P12_P17_2_4_3-4_5_5 | 0.0253128  | 0.0253172  | 0.301392 | 1.69861 |
| Ato_P12_P17_2_3_4-4_5_5 | 0.0253109  | 0.0253275  | 0.30143  | 1.69857 |
| Ato_P13_P13_2_5_3-3_2_5 | 0.0254245  | 0.0254524  | 0.350111 | 1.64989 |
| Ato_P13_P13_2_3_5-3_5_2 | 0.0254584  | 0.0254581  | 0.349762 | 1.65024 |
| Ato_P10_P12_2_3_2-2_4_3 | 0.025616   | 0.0256448  | 0.34218  | 1.65782 |
| Ato_P9_P12_1_3_2-3_2_4  | 0.025648   | 0.0256397  | 0.472672 | 1.52733 |
| Ato_P10_P12_2_2_3-2_3_4 | 0.0256228  | 0.0256597  | 0.342169 | 1.65783 |
| Ato_P9_P12_1_2_3-3_4_2  | 0.0256598  | 0.0256614  | 0.472295 | 1.52771 |
| Ato_P8_P16_1_2_2-3_5_5  | 0.0257208  | 0.0257828  | 0.305313 | 1.69469 |
| Ato_P11_P14_3_2_3-2_5_4 | 0.0259768  | 0.0259827  | 0.306866 | 1.69313 |
| Ato_P11_P14_3_3_2-2_4_5 | 0.0259928  | 0.025972   | 0.307142 | 1.69286 |
| Ato_P7_P14_1_2_1-3_3_5  | 0.0259734  | 0.0260111  | 0.378477 | 1.62152 |
| Ato_P7_P14_1_1_2-3_5_3  | 0.0259815  | 0.0260127  | 0.37811  | 1.62189 |
| Ato_P9_P10_1_4_1-2_1_4  | 0.0260276  | 0.0260255  | 0.507134 | 1.49287 |
| Ato_P9_P10_1_1_4-2_4_1  | 0.0260068  | 0.0260284  | 0.506887 | 1.49311 |
| Ato_P13_P13_3_3_4-3_3_4 | 0.02616    | 0.0261955  | 0.288971 | 1.71103 |
| Ato_P13_P13_3_4_3-3_4_3 | 0.0262647  | 0.0262614  | 0.292534 | 1.70747 |
| Ato_P12_P14_2_4_3-2_5_4 | 0.0262426  | 0.026288   | 0.282616 | 1.71738 |
| Ato_P12_P14_2_3_4-2_4_5 | 0.026295   | 0.026294   | 0.282734 | 1.71727 |
| Ato_P7_P7_1_1_2-1_2_1   | 0.0264813  | 0.0264946  | 0.510055 | 1.48995 |
| Ato_P6_P12_1_1_1-1_4_4  | 0.0265889  | 0.0265711  | 0.504874 | 1.49513 |
| Ato_P15_P17_4_4_4-4_5_5 | 0.0270442  | 0.027095   | 0.25428  | 1.74572 |
| Ato_P14_P16_3_4_4-4_4_5 | 0.0270965  | 0.0271374  | 0.366756 | 1.63324 |
| Ato_P7_P11_1_2_1-2_2_4  | 0.0271595  | 0.027172   | 0.501187 | 1.49881 |
| Ato_P7_P11_1_1_2-2_4_2  | 0.0271889  | 0.027173   | 0.500766 | 1.49923 |
| Ato_P12_P14_3_3_3-2_5_4 | 0.0273631  | 0.0273717  | 0.283503 | 1.7165  |
| Ato_P12_P14_3_3_3-2_4_5 | 0.027355   | 0.0273842  | 0.283169 | 1.71683 |
| Ato_P13_P15_2_4_4-3_5_4 | 0.0274081  | 0.0274469  | 0.297311 | 1.70269 |

| name                    | $\Delta_l$ | $\Delta_a$ | $c_l$    | $c_a$   |
|-------------------------|------------|------------|----------|---------|
| Ato_P13_P15_2_4_4-3_4_5 | 0.0274352  | 0.0274511  | 0.297506 | 1.70249 |
| Ato_P7_P9_1_1_2-1_3_2   | 0.0275122  | 0.0275104  | 0.530539 | 1.46946 |
| Ato_P9_P14_2_2_2-2_5_4  | 0.0275002  | 0.0275215  | 0.279787 | 1.72021 |
| Ato_P7_P9_1_2_1-1_2_3   | 0.0275293  | 0.0275294  | 0.531365 | 1.46864 |
| Ato_P9_P14_2_2_2-2_4_5  | 0.027533   | 0.0275233  | 0.279761 | 1.72024 |
| Ato_P9_P16_2_2_2-3_5_5  | 0.0275847  | 0.0275793  | 0.308193 | 1.69181 |
| Ato_P14_P17_2_5_4-4_5_5 | 0.0277481  | 0.027753   | 0.292015 | 1.70798 |
| Ato_P14_P17_2_4_5-4_5_5 | 0.0277519  | 0.0277591  | 0.292542 | 1.70746 |
| Ato_P11_P12_1_3_4-3_4_2 | 0.0277832  | 0.0277834  | 0.402665 | 1.59733 |
| Ato_P11_P12_1_4_3-3_2_4 | 0.0277859  | 0.027784   | 0.401967 | 1.59803 |
| Ato_P13_P13_2_5_3-3_3_4 | 0.0278355  | 0.0278387  | 0.334574 | 1.66543 |
| Ato_P13_P13_2_3_5-3_4_3 | 0.0278324  | 0.0278489  | 0.334121 | 1.66588 |
| Ato_P9_P13_2_3_1-2_3_5  | 0.0278542  | 0.027886   | 0.224954 | 1.77505 |
| Ato_P9_P13_2_1_3-2_5_3  | 0.0278594  | 0.0278964  | 0.225492 | 1.77451 |
| Ato_P11_P13_1_4_3-3_3_4 | 0.0279794  | 0.0279757  | 0.277335 | 1.72266 |
| Ato_P11_P13_1_3_4-3_4_3 | 0.0279607  | 0.0279995  | 0.277784 | 1.72222 |
| Ato_P12_P16_3_3_3-3_5_5 | 0.0281827  | 0.0281788  | 0.255955 | 1.74405 |
| Ato_P12_P12_3_3_3-3_3_3 | 0.0284298  | 0.0284415  | 0.336683 | 1.66332 |
| Ato_P10_P13_2_3_2-2_4_4 | 0.0285299  | 0.0285357  | 0.409723 | 1.59028 |
| Ato_P10_P13_2_2_3-2_4_4 | 0.0285256  | 0.0285361  | 0.4098   | 1.5902  |
| Ato_P8_P12_1_1_3-2_5_2  | 0.0285395  | 0.0285396  | 0.332501 | 1.6675  |
| Ato_P8_P12_1_3_1-2_2_5  | 0.0285223  | 0.0285547  | 0.333061 | 1.66694 |
| Ato_P13_P16_2_4_4-5_4_4 | 0.0285998  | 0.0286029  | 0.231188 | 1.76881 |
| Ato_P13_P17_2_4_4-5_4_5 | 0.0286174  | 0.0286719  | 0.307096 | 1.6929  |
| Ato_P13_P17_2_4_4-5_5_4 | 0.0286626  | 0.0286722  | 0.307195 | 1.6928  |
| Ato_P10_P11_1_3_3-2_3_3 | 0.0286992  | 0.0286997  | 0.369959 | 1.63004 |
| Ato_P10_P11_1_2_4-3_4_1 | 0.028873   | 0.0288854  | 0.438469 | 1.56153 |
| Ato_P10_P11_1_4_2-3_1_4 | 0.028903   | 0.0289022  | 0.439112 | 1.56089 |
| Ato_P8_P8_1_1_3-1_3_1   | 0.0289633  | 0.0289821  | 0.470778 | 1.52922 |
| Ato_P11_P14_2_3_3-2_4_5 | 0.0290606  | 0.0290637  | 0.449245 | 1.55076 |
| Ato_P11_P14_2_3_3-2_5_4 | 0.0290353  | 0.0290643  | 0.449794 | 1.55021 |
| Ato_P8_P9_1_2_2-1_2_3   | 0.0291837  | 0.0291992  | 0.481433 | 1.51857 |
| Ato_P8_P9_1_2_2-1_3_2   | 0.0292104  | 0.0292059  | 0.483925 | 1.51608 |
| Ato_P14_P17_3_5_3-4_5_5 | 0.0293694  | 0.029395   | 0.300297 | 1.6997  |
| Ato_P14_P17_3_3_5-4_5_5 | 0.0293284  | 0.0294043  | 0.301164 | 1.69884 |
| Ato_P11_P12_2_2_4-2_5_2 | 0.0295648  | 0.0296041  | 0.434474 | 1.56553 |
| Ato_P11_P12_2_4_2-2_2_5 | 0.0295774  | 0.0296161  | 0.434319 | 1.56568 |
| Ato_P13_P15_4_3_3-2_5_5 | 0.0296174  | 0.0296348  | 0.273742 | 1.72626 |
| Ato_P13_P14_2_4_4-2_5_4 | 0.0300095  | 0.0300809  | 0.30903  | 1.69097 |

| name                    | $\Delta_l$ | $\Delta_a$ | $c_l$    | $c_a$   |
|-------------------------|------------|------------|----------|---------|
| Ato_P13_P14_2_4_4-2_4_5 | 0.0300376  | 0.0301014  | 0.30903  | 1.69097 |
| Ato_P13_P14_3_3_4-3_4_4 | 0.0302127  | 0.0302272  | 0.334327 | 1.66567 |
| Ato_P13_P14_3_4_3-3_4_4 | 0.0302354  | 0.0302353  | 0.33395  | 1.66605 |
| Ato_P12_P14_3_4_2-2_4_5 | 0.0302491  | 0.0303024  | 0.260101 | 1.7399  |
| Ato_P12_P14_3_2_4-2_5_4 | 0.0302632  | 0.0303161  | 0.260318 | 1.73968 |
| Ato_P13_P16_2_5_3-4_4_5 | 0.0303028  | 0.0303197  | 0.333919 | 1.66608 |
| Ato_P13_P16_2_3_5-4_5_4 | 0.030328   | 0.0303262  | 0.33362  | 1.66638 |
| Ato_P12_P18_2_4_3-5_5_5 | 0.0305916  | 0.0305823  | 0.324225 | 1.67577 |
| Ato_P12_P18_2_3_4-5_5_5 | 0.0305219  | 0.030617   | 0.32514  | 1.67486 |
| Ato_P11_P13_2_4_2-3_2_5 | 0.0308794  | 0.0308854  | 0.320647 | 1.67935 |
| Ato_P11_P13_2_2_4-3_5_2 | 0.0308744  | 0.0309014  | 0.320819 | 1.67918 |
| Ato_P6_P16_1_1_1-3_5_5  | 0.0309407  | 0.0309519  | 0.476268 | 1.52373 |
| Ato_P10_P10_2_1_4-2_4_1 | 0.031172   | 0.0311671  | 0.403786 | 1.59621 |
| Ato_P14_P14_2_4_5-3_5_3 | 0.0311908  | 0.0311978  | 0.291804 | 1.7082  |
| Ato_P16_P17_4_5_4-4_5_5 | 0.031145   | 0.0312054  | 0.304882 | 1.69512 |
| Ato_P14_P14_2_5_4-3_3_5 | 0.0312117  | 0.03119    | 0.291666 | 1.70833 |
| Ato_P16_P17_4_4_5-4_5_5 | 0.0311966  | 0.0312119  | 0.30479  | 1.69521 |
| Ato_P7_P15_1_1_2-3_5_4  | 0.0312166  | 0.0312169  | 0.442616 | 1.55738 |
| Ato_P7_P15_1_2_1-3_4_5  | 0.0312227  | 0.0312323  | 0.442928 | 1.55707 |
| Ato_P12_P15_2_3_4-4_5_3 | 0.0313242  | 0.0313157  | 0.264242 | 1.73576 |
| Ato_P12_P15_2_4_3-4_3_5 | 0.0312216  | 0.0313252  | 0.265152 | 1.73485 |
| Ato_P14_P14_2_5_4-3_4_4 | 0.0316485  | 0.0316746  | 0.301101 | 1.6989  |
| Ato_P14_P14_2_4_5-3_4_4 | 0.0316656  | 0.0316843  | 0.301672 | 1.69833 |
| Ato_P12_P14_2_4_3-3_4_4 | 0.0318197  | 0.0318344  | 0.300602 | 1.6994  |
| Ato_P12_P14_2_3_4-3_4_4 | 0.0318259  | 0.0318536  | 0.300693 | 1.69931 |
| Ato_P13_P15_3_3_4-2_5_5 | 0.0318442  | 0.0318854  | 0.268449 | 1.73155 |
| Ato_P13_P15_3_4_3-2_5_5 | 0.0318978  | 0.031854   | 0.268227 | 1.73177 |
| Ato_P14_P16_2_4_5-5_5_3 | 0.0319236  | 0.0319657  | 0.263201 | 1.7368  |
| Ato_P14_P16_2_5_4-5_3_5 | 0.0318774  | 0.0319735  | 0.263284 | 1.73672 |
| Ato_P11_P17_2_3_3-5_5_4 | 0.03223    | 0.0322911  | 0.353315 | 1.64669 |
| Ato_P11_P17_2_3_3-5_4_5 | 0.032367   | 0.0323667  | 0.352021 | 1.64798 |
| Ato_P11_P13_2_3_3-2_3_5 | 0.03242    | 0.0324262  | 0.424    | 1.576   |
| Ato_P9_P12_2_3_1-2_2_5  | 0.032442   | 0.032458   | 0.478797 | 1.5212  |
| Ato_P9_P12_2_1_3-2_5_2  | 0.0324554  | 0.0324603  | 0.47885  | 1.52115 |
| Ato_P11_P12_2_4_2-2_3_4 | 0.0324945  | 0.0325257  | 0.472066 | 1.52793 |
| Ato_P11_P12_2_2_4-2_4_3 | 0.0325242  | 0.0325381  | 0.4721   | 1.5279  |
| Ato_P11_P13_2_3_3-2_5_3 | 0.0329569  | 0.0329563  | 0.407161 | 1.59284 |
| Ato_P10_P11_2_2_3-1_4_3 | 0.0330869  | 0.0331356  | 0.293619 | 1.70638 |
| Ato_P10_P11_2_3_2-1_3_4 | 0.0330918  | 0.0331407  | 0.294105 | 1.70589 |



| name                    | $\Delta_l$ | $\Delta_a$ | $c_l$    | $c_a$   |
|-------------------------|------------|------------|----------|---------|
| Ato_P12_P15_2_3_4-4_4_4 | 0.0331899  | 0.0332187  | 0.297182 | 1.70282 |
| Ato_P12_P15_2_4_3-4_4_4 | 0.0332025  | 0.0332447  | 0.297099 | 1.7029  |
| Ato_P13_P14_2_5_3-4_2_5 | 0.033377   | 0.0334235  | 0.239733 | 1.76027 |
| Ato_P12_P14_3_3_3-3_4_4 | 0.0333513  | 0.033426   | 0.317105 | 1.6829  |
| Ato_P13_P14_2_3_5-4_5_2 | 0.0334447  | 0.0334312  | 0.239114 | 1.76089 |
| Ato_P14_P16_2_4_5-5_4_4 | 0.0335385  | 0.0335539  | 0.212791 | 1.78721 |
| Ato_P14_P16_2_5_4-5_4_4 | 0.0334717  | 0.0335622  | 0.212806 | 1.78719 |
| Ato_P14_P14_2_4_5-2_4_5 | 0.0336158  | 0.033636   | 0.222697 | 1.7773  |
| Ato_P11_P15_2_3_3-2_5_5 | 0.0339565  | 0.0340572  | 0.242508 | 1.75749 |
| Ato_P14_P14_2_5_4-2_5_4 | 0.0339492  | 0.0340812  | 0.22713  | 1.77287 |
| Ato_P12_P12_2_3_4-3_3_3 | 0.0341915  | 0.0342078  | 0.280836 | 1.71916 |
| Ato_P12_P12_2_4_3-3_3_3 | 0.0341896  | 0.0342231  | 0.281421 | 1.71858 |
| Ato_P15_P15_3_5_4-4_4_4 | 0.0344136  | 0.0344178  | 0.260567 | 1.73943 |
| Ato_P15_P15_3_4_5-4_4_4 | 0.0343773  | 0.0344236  | 0.261357 | 1.73864 |
| Ato_P7_P8_1_1_2-1_2_2   | 0.0344618  | 0.0344782  | 0.744132 | 1.25587 |
| Ato_P7_P8_1_2_1-1_2_2   | 0.0344514  | 0.0344834  | 0.74456  | 1.25544 |
| Ato_P12_P13_2_4_3-2_4_4 | 0.034493   | 0.0345007  | 0.39448  | 1.60552 |
| Ato_P12_P13_2_3_4-2_4_4 | 0.0345166  | 0.0345218  | 0.394814 | 1.60519 |
| Ato_P8_P11_1_1_3-2_4_2  | 0.0347102  | 0.0347112  | 0.527882 | 1.47212 |
| Ato_P8_P11_1_3_1-2_2_4  | 0.0346315  | 0.0347147  | 0.529429 | 1.47057 |
| Ato_P13_P14_3_4_3-3_3_5 | 0.0347922  | 0.0347948  | 0.241168 | 1.75883 |
| Ato_P13_P14_3_3_4-3_5_3 | 0.034766   | 0.0348197  | 0.240914 | 1.75909 |
| Ato_P9_P11_1_2_3-3_3_2  | 0.0347888  | 0.0348282  | 0.345912 | 1.65409 |
| Ato_P9_P11_1_3_2-3_2_3  | 0.0348263  | 0.0348386  | 0.345682 | 1.65432 |
| Ato_P9_P9_2_2_2-2_2_2   | 0.0348644  | 0.0348718  | 0.463357 | 1.53664 |
| Ato_P11_P16_2_3_3-4_5_4 | 0.0348812  | 0.0348842  | 0.293352 | 1.70665 |
| Ato_P11_P16_2_3_3-4_4_5 | 0.0348927  | 0.0349097  | 0.293348 | 1.70665 |
| Ato_P8_P15_1_2_2-3_4_5  | 0.0349224  | 0.0349075  | 0.50397  | 1.49603 |
| Ato_P8_P15_1_2_2-3_5_4  | 0.0349322  | 0.0349318  | 0.504105 | 1.49589 |
| Ato_P10_P13_1_3_3-3_4_3 | 0.0351946  | 0.0352204  | 0.362515 | 1.63749 |
| Ato_P10_P13_1_3_3-3_3_4 | 0.0351877  | 0.0352438  | 0.362586 | 1.63741 |
| Ato_P11_P15_3_2_3-2_5_5 | 0.0355671  | 0.035572   | 0.240961 | 1.75904 |
| Ato_P10_P14_2_2_3-3_5_3 | 0.0355716  | 0.0355891  | 0.322834 | 1.67717 |
| Ato_P10_P14_2_3_2-3_3_5 | 0.0355794  | 0.0355897  | 0.322979 | 1.67702 |
| Ato_P11_P15_3_3_2-2_5_5 | 0.0355839  | 0.0355897  | 0.241105 | 1.75889 |
| Ato_P6_P14_1_1_1-2_4_5  | 0.035575   | 0.0355951  | 0.373376 | 1.62662 |
| Ato_P6_P14_1_1_1-2_5_4  | 0.0355716  | 0.0356194  | 0.373924 | 1.62608 |
| Ato_P10_P14_2_3_2-2_5_4 | 0.0356192  | 0.0356438  | 0.348124 | 1.65188 |
| Ato_P10_P14_2_2_3-2_4_5 | 0.0356476  | 0.0356482  | 0.347603 | 1.6524  |

| name                    | $\Delta_l$ | $\Delta_a$ | $c_l$    | $c_a$   |
|-------------------------|------------|------------|----------|---------|
| Ato_P12_P14_1_4_4-3_4_4 | 0.0354984  | 0.0356731  | 0.241666 | 1.75833 |
| Ato_P12_P14_2_4_3-2_4_5 | 0.0356386  | 0.0356985  | 0.267559 | 1.73244 |
| Ato_P14_P16_3_3_5-4_5_4 | 0.0356796  | 0.0357224  | 0.198648 | 1.80135 |
| Ato_P12_P14_2_3_4-2_5_4 | 0.0355529  | 0.0357248  | 0.267451 | 1.73255 |
| Ato_P14_P16_3_5_3-4_4_5 | 0.0357286  | 0.0357232  | 0.198609 | 1.80139 |
| Ato_P13_P14_2_4_4-4_3_4 | 0.0357657  | 0.0357581  | 0.327282 | 1.67272 |
| Ato_P13_P14_2_4_4-4_4_3 | 0.0357828  | 0.0357842  | 0.327743 | 1.67226 |
| Ato_P13_P13_2_3_5-2_5_3 | 0.0361682  | 0.0361693  | 0.215769 | 1.78423 |
| Ato_P12_P17_2_4_3-5_4_5 | 0.0364626  | 0.0364781  | 0.302466 | 1.69753 |
| Ato_P12_P17_2_3_4-5_5_4 | 0.0364137  | 0.0364798  | 0.302256 | 1.69774 |
| Ato_P15_P16_3_4_5-4_4_5 | 0.0365203  | 0.0365348  | 0.33477  | 1.66523 |
| Ato_P15_P16_3_5_4-4_5_4 | 0.0365369  | 0.0365467  | 0.334572 | 1.66543 |
| Ato_P15_P15_3_5_4-4_3_5 | 0.0365574  | 0.0365745  | 0.250314 | 1.74969 |
| Ato_P15_P15_3_4_5-4_5_3 | 0.0364777  | 0.0365989  | 0.24952  | 1.75048 |
| Ato_P13_P16_2_3_5-5_5_3 | 0.0367711  | 0.0367946  | 0.268537 | 1.73146 |
| Ato_P10_P11_2_2_3-2_4_2 | 0.0368066  | 0.0367869  | 0.339602 | 1.6604  |
| Ato_P10_P11_2_3_2-2_2_4 | 0.0367696  | 0.0368158  | 0.339264 | 1.66074 |
| Ato_P13_P16_2_5_3-5_3_5 | 0.0367754  | 0.0368234  | 0.26838  | 1.73162 |
| Ato_P16_P17_3_5_5-5_5_4 | 0.0367763  | 0.0368278  | 0.276052 | 1.72395 |
| Ato_P16_P17_3_5_5-5_4_5 | 0.0368308  | 0.0368309  | 0.276323 | 1.72368 |
| Ato_P13_P17_3_4_3-4_5_5 | 0.0368251  | 0.0368699  | 0.235426 | 1.76457 |
| Ato_P13_P17_3_3_4-4_5_5 | 0.0368639  | 0.0368763  | 0.235369 | 1.76463 |
| Ato_P11_P13_2_3_3-3_4_3 | 0.0369999  | 0.0370257  | 0.332432 | 1.66757 |
| Ato_P11_P13_2_3_3-3_3_4 | 0.0370119  | 0.0370607  | 0.331918 | 1.66808 |
| Ato_P15_P15_2_5_5-3_4_5 | 0.0371037  | 0.0371535  | 0.32032  | 1.67968 |
| Ato_P15_P15_2_5_5-3_5_4 | 0.0371089  | 0.0371625  | 0.320561 | 1.67944 |
| Ato_P13_P13_3_2_5-3_5_2 | 0.0375128  | 0.0375419  | 0.291436 | 1.70856 |
| Ato_P15_P15_2_5_5-4_3_5 | 0.0375943  | 0.0375727  | 0.316531 | 1.68347 |
| Ato_P15_P15_2_5_5-4_5_3 | 0.0376178  | 0.0375801  | 0.31644  | 1.68356 |
| Ato_P12_P13_2_3_4-2_5_3 | 0.0378061  | 0.037849   | 0.355085 | 1.64491 |
| Ato_P12_P13_2_4_3-2_3_5 | 0.0378578  | 0.0378442  | 0.354853 | 1.64515 |
| Ato_P11_P13_2_2_4-2_4_4 | 0.0379429  | 0.0379819  | 0.748292 | 1.25171 |
| Ato_P11_P13_2_4_2-2_4_4 | 0.0379795  | 0.0379958  | 0.747597 | 1.2524  |
| Ato_P13_P14_3_2_5-3_5_3 | 0.0379335  | 0.0380008  | 0.26251  | 1.73749 |
| Ato_P13_P14_3_5_2-3_3_5 | 0.0378803  | 0.0380305  | 0.263781 | 1.73622 |
| Ato_P16_P17_4_5_4-5_5_4 | 0.0380817  | 0.0380724  | 0.237577 | 1.76242 |
| Ato_P8_P9_1_1_3-2_3_1   | 0.0380504  | 0.0380861  | 0.483103 | 1.5169  |
| Ato_P8_P9_1_3_1-2_1_3   | 0.0380347  | 0.0380904  | 0.48309  | 1.51691 |
| Ato_P9_P11_2_2_2-1_3_4  | 0.0380941  | 0.0380937  | 0.460939 | 1.53906 |

| name                    | $\Delta_l$ | $\Delta_a$ | $c_l$    | $c_a$   |
|-------------------------|------------|------------|----------|---------|
| Ato_P9_P11_2_2_2-1_4_3  | 0.0380862  | 0.0381053  | 0.461544 | 1.53846 |
| Ato_P11_P12_1_4_3-3_3_3 | 0.038079   | 0.038108   | 0.433397 | 1.5666  |
| Ato_P11_P12_1_3_4-3_3_3 | 0.0381248  | 0.0381141  | 0.432989 | 1.56701 |
| Ato_P16_P17_4_4_5-5_4_5 | 0.0382261  | 0.0382252  | 0.243239 | 1.75676 |
| Ato_P10_P10_2_2_3-2_2_3 | 0.0382165  | 0.038253   | 0.360685 | 1.63932 |
| Ato_P15_P18_4_4_4-5_5_5 | 0.0382522  | 0.0382817  | 0.25757  | 1.74243 |
| Ato_P10_P10_2_3_2-2_3_2 | 0.0383247  | 0.0383238  | 0.360509 | 1.63949 |
| Ato_P9_P15_2_1_3-3_5_4  | 0.0383347  | 0.038369   | 0.275771 | 1.72423 |
| Ato_P9_P15_2_3_1-3_4_5  | 0.0383029  | 0.0384012  | 0.276706 | 1.72329 |
| Ato_P15_P17_3_5_4-5_5_4 | 0.0383743  | 0.0384993  | 0.269153 | 1.73085 |
| Ato_P15_P17_3_4_5-5_4_5 | 0.0383588  | 0.0385671  | 0.269153 | 1.73085 |
| Ato_P10_P15_3_2_2-2_5_5 | 0.0386301  | 0.0386614  | 0.385097 | 1.6149  |
| Ato_P9_P12_2_2_2-2_4_3  | 0.0387268  | 0.0387363  | 0.304913 | 1.69509 |
| Ato_P9_P12_2_2_2-2_3_4  | 0.0387596  | 0.0387592  | 0.305028 | 1.69497 |
| Ato_P12_P15_3_4_2-3_4_5 | 0.0388338  | 0.0388619  | 0.26102  | 1.73898 |
| Ato_P14_P14_2_4_5-2_5_4 | 0.0388324  | 0.0388767  | 0.243335 | 1.75666 |
| Ato_P12_P15_3_2_4-3_5_4 | 0.0389048  | 0.0389136  | 0.260728 | 1.73927 |
| Ato_P10_P11_1_3_3-3_3_2 | 0.0390397  | 0.0390401  | 0.42174  | 1.57826 |
| Ato_P10_P10_2_2_3-2_3_2 | 0.0390584  | 0.0390735  | 0.312876 | 1.68712 |
| Ato_P10_P11_1_3_3-3_2_3 | 0.0390679  | 0.0390838  | 0.422547 | 1.57745 |
| Ato_P11_P15_2_4_2-3_4_5 | 0.0391175  | 0.0391312  | 0.315072 | 1.68493 |
| Ato_P11_P15_2_2_4-3_5_4 | 0.0390896  | 0.0391448  | 0.315484 | 1.68452 |
| Ato_P15_P15_2_5_5-2_5_5 | 0.0392988  | 0.0393351  | 0.1655   | 1.8345  |
| Ato_P9_P11_1_2_3-2_4_2  | 0.0394555  | 0.0394969  | 0.341692 | 1.65831 |
| Ato_P9_P11_1_3_2-2_2_4  | 0.0394251  | 0.0394977  | 0.341559 | 1.65844 |
| Ato_P12_P14_2_5_2-3_3_5 | 0.0396778  | 0.0397093  | 0.376151 | 1.62385 |
| Ato_P12_P14_2_2_5-3_5_3 | 0.0396995  | 0.039714   | 0.376403 | 1.6236  |
| Ato_P14_P16_2_4_5-3_5_5 | 0.039751   | 0.0397785  | 0.307013 | 1.69299 |
| Ato_P14_P16_2_5_4-3_5_5 | 0.0397256  | 0.0398023  | 0.307407 | 1.69259 |
| Ato_P16_P18_4_4_5-5_5_5 | 0.0398326  | 0.0399051  | 0.309693 | 1.69031 |
| Ato_P11_P12_2_2_4-3_4_2 | 0.0400009  | 0.0400137  | 0.327871 | 1.67213 |
| Ato_P13_P17_2_3_5-5_5_4 | 0.0399488  | 0.0400183  | 0.234792 | 1.76521 |
| Ato_P13_P17_2_5_3-5_4_5 | 0.0399923  | 0.0400199  | 0.23441  | 1.76559 |
| Ato_P11_P12_2_4_2-3_2_4 | 0.0399813  | 0.0400366  | 0.328404 | 1.6716  |
| Ato_P14_P16_2_4_5-4_4_5 | 0.0400554  | 0.0400546  | 0.31725  | 1.68275 |
| Ato_P9_P15_1_3_2-3_4_5  | 0.0400615  | 0.0400429  | 0.34341  | 1.65659 |
| Ato_P16_P18_4_5_4-5_5_5 | 0.0400248  | 0.0400751  | 0.311733 | 1.68827 |
| Ato_P9_P15_1_2_3-3_5_4  | 0.0400784  | 0.0400664  | 0.343638 | 1.65636 |
| Ato_P14_P17_3_4_4-5_4_5 | 0.0400815  | 0.0400983  | 0.329013 | 1.67099 |

| name                    | $\Delta_l$ | $\Delta_a$ | $c_l$    | $c_a$   |
|-------------------------|------------|------------|----------|---------|
| Ato_P13_P14_2_5_3-4_3_4 | 0.0401018  | 0.0400819  | 0.254782 | 1.74522 |
| Ato_P8_P13_1_2_2-2_4_4  | 0.0400967  | 0.0401032  | 0.343576 | 1.65642 |
| Ato_P13_P14_2_3_5-4_4_3 | 0.0400172  | 0.0401058  | 0.254665 | 1.74534 |
| Ato_P14_P17_3_4_4-5_5_4 | 0.0400071  | 0.0401356  | 0.329474 | 1.67053 |
| Ato_P14_P17_2_5_4-5_5_4 | 0.0400798  | 0.0401381  | 0.306153 | 1.69385 |
| Ato_P14_P17_2_4_5-5_4_5 | 0.04014    | 0.0401485  | 0.306197 | 1.6938  |
| Ato_P11_P12_3_1_4-2_5_2 | 0.0403311  | 0.0403689  | 0.397237 | 1.60276 |
| Ato_P11_P12_3_4_1-2_2_5 | 0.040352   | 0.0403703  | 0.397091 | 1.60291 |
| Ato_P11_P13_2_4_2-3_3_4 | 0.0403449  | 0.0403945  | 0.310443 | 1.68956 |
| Ato_P11_P13_2_2_4-3_4_3 | 0.0404081  | 0.0403779  | 0.310284 | 1.68972 |
| Ato_P14_P15_3_3_5-4_5_3 | 0.0404479  | 0.0404976  | 0.22774  | 1.77226 |
| Ato_P13_P14_4_3_3-2_5_4 | 0.0406416  | 0.0406557  | 0.300877 | 1.69912 |
| Ato_P13_P14_4_3_3-2_4_5 | 0.0406706  | 0.0406695  | 0.301133 | 1.69887 |
| Ato_P10_P14_2_2_3-3_4_4 | 0.0406541  | 0.0406815  | 0.39517  | 1.60483 |
| Ato_P10_P14_2_3_2-3_4_4 | 0.0406869  | 0.0406856  | 0.39553  | 1.60447 |
| Ato_P12_P15_2_3_4-2_5_5 | 0.0407204  | 0.0406925  | 0.357813 | 1.64219 |
| Ato_P12_P15_2_4_3-2_5_5 | 0.0407231  | 0.0407105  | 0.358101 | 1.6419  |
| Ato_P12_P14_2_2_5-4_5_2 | 0.0408254  | 0.0409067  | 0.318561 | 1.68144 |
| Ato_P12_P14_2_5_2-4_2_5 | 0.0409016  | 0.0409069  | 0.318806 | 1.68119 |
| Ato_P12_P16_3_4_2-3_5_5 | 0.0409133  | 0.0409296  | 0.29171  | 1.70829 |
| Ato_P12_P16_3_2_4-3_5_5 | 0.0409123  | 0.0409405  | 0.291309 | 1.70869 |
| Ato_P11_P15_2_2_4-4_5_3 | 0.0409036  | 0.0409424  | 0.27638  | 1.72362 |
| Ato_P11_P15_2_4_2-4_3_5 | 0.0408453  | 0.0409445  | 0.276746 | 1.72325 |
| Ato_P12_P13_1_4_4-3_4_3 | 0.0410014  | 0.0410982  | 0.329693 | 1.67031 |
| Ato_P12_P16_1_4_4-3_5_5 | 0.0411891  | 0.0412201  | 0.179618 | 1.82038 |
| Ato_P14_P16_4_3_4-3_5_5 | 0.0412818  | 0.0413021  | 0.281178 | 1.71882 |
| Ato_P14_P16_4_4_3-3_5_5 | 0.041316   | 0.0413021  | 0.281456 | 1.71854 |
| Ato_P8_P13_1_2_2-3_4_3  | 0.0413925  | 0.0413726  | 0.460231 | 1.53977 |
| Ato_P8_P13_1_2_2-3_3_4  | 0.0413846  | 0.0413942  | 0.460465 | 1.53953 |
| Ato_P7_P10_1_2_1-2_2_3  | 0.0415187  | 0.0415408  | 0.471516 | 1.52848 |
| Ato_P11_P14_1_4_3-3_3_5 | 0.0415302  | 0.0415565  | 0.247267 | 1.75273 |
| Ato_P11_P14_1_3_4-3_5_3 | 0.0414136  | 0.041558   | 0.246931 | 1.75307 |
| Ato_P7_P10_1_1_2-2_3_2  | 0.041516   | 0.0415588  | 0.471094 | 1.52891 |
| Ato_P12_P12_2_5_2-3_2_4 | 0.0418856  | 0.0419019  | 0.357836 | 1.64216 |
| Ato_P12_P12_2_2_5-3_4_2 | 0.0417814  | 0.0419031  | 0.358374 | 1.64163 |
| Ato_P12_P16_2_3_4-3_5_5 | 0.0423653  | 0.0424234  | 0.301872 | 1.69813 |
| Ato_P12_P16_2_4_3-3_5_5 | 0.0424351  | 0.0424039  | 0.301805 | 1.69819 |
| Ato_P17_P17_5_4_5-5_4_5 | 0.0425388  | 0.0425265  | 0.229644 | 1.77036 |
| Ato_P17_P17_5_5_4-5_5_4 | 0.0425456  | 0.0426039  | 0.228076 | 1.77192 |

| name                    | $\Delta_l$ | $\Delta_a$ | $c_l$    | $c_a$   |
|-------------------------|------------|------------|----------|---------|
| Ato_P11_P12_2_4_2-2_4_3 | 0.0426907  | 0.0426834  | 0.409876 | 1.59012 |
| Ato_P10_P13_2_3_2-3_3_4 | 0.0426625  | 0.042694   | 0.305782 | 1.69422 |
| Ato_P11_P12_2_2_4-2_3_4 | 0.0426622  | 0.0427     | 0.414561 | 1.58544 |
| Ato_P10_P13_2_2_3-3_4_3 | 0.0427137  | 0.0427128  | 0.305812 | 1.69419 |
| Ato_P16_P16_4_4_5-4_5_4 | 0.042736   | 0.0427728  | 0.281003 | 1.719   |
| Ato_P10_P15_1_3_3-3_4_5 | 0.0427737  | 0.0427812  | 0.381925 | 1.61808 |
| Ato_P10_P15_1_3_3-3_5_4 | 0.042789   | 0.0427698  | 0.382074 | 1.61793 |
| Ato_P10_P13_2_1_4-3_5_2 | 0.0427887  | 0.0427915  | 0.368512 | 1.63149 |
| Ato_P10_P13_2_4_1-3_2_5 | 0.0427762  | 0.0428191  | 0.368695 | 1.6313  |
| Ato_P11_P16_2_2_4-3_5_5 | 0.0428049  | 0.0428372  | 0.509245 | 1.49076 |
| Ato_P11_P16_2_4_2-3_5_5 | 0.0428375  | 0.0428487  | 0.509316 | 1.49068 |
| Ato_P12_P12_2_4_3-3_2_4 | 0.0429265  | 0.0429805  | 0.247579 | 1.75242 |
| Ato_P12_P12_2_3_4-3_4_2 | 0.0429436  | 0.0429892  | 0.247422 | 1.75258 |
| Ato_P9_P15_2_2_2-3_5_4  | 0.0431969  | 0.0432017  | 0.310194 | 1.68981 |
| Ato_P9_P15_2_2_2-3_4_5  | 0.043129   | 0.0432185  | 0.3104   | 1.6896  |
| Ato_P15_P16_4_3_5-3_5_5 | 0.0432055  | 0.0432755  | 0.199293 | 1.80071 |
| Ato_P15_P16_4_5_3-3_5_5 | 0.0432436  | 0.043303   | 0.199149 | 1.80085 |
| Ato_P10_P14_1_2_4-3_5_3 | 0.0432888  | 0.0433564  | 0.376847 | 1.62315 |
| Ato_P10_P14_1_4_2-3_3_5 | 0.0433636  | 0.0433732  | 0.376115 | 1.62388 |
| Ato_P13_P15_2_4_4-2_5_5 | 0.043323   | 0.0433882  | 0.288748 | 1.71125 |
| Ato_P13_P13_2_5_3-4_2_4 | 0.0433616  | 0.0434509  | 0.323472 | 1.67653 |
| Ato_P13_P13_2_3_5-4_4_2 | 0.0434301  | 0.0434598  | 0.323704 | 1.6763  |
| Ato_P14_P14_3_3_5-3_3_5 | 0.0432908  | 0.0435123  | 0.243333 | 1.75667 |
| Ato_P8_P14_2_1_2-2_5_4  | 0.0435545  | 0.0435902  | 0.333032 | 1.66697 |
| Ato_P8_P14_2_2_1-2_4_5  | 0.0435064  | 0.0436144  | 0.333601 | 1.6664  |
| Ato_P9_P12_1_2_3-2_4_3  | 0.0435757  | 0.0436163  | 0.319094 | 1.68091 |
| Ato_P9_P12_1_3_2-2_3_4  | 0.0435708  | 0.0436273  | 0.319793 | 1.68021 |
| Ato_P12_P14_2_3_4-4_4_3 | 0.0437252  | 0.0437922  | 0.280368 | 1.71963 |
| Ato_P12_P14_2_4_3-4_3_4 | 0.0438006  | 0.0437878  | 0.280053 | 1.71995 |
| Ato_P13_P14_2_3_5-2_4_5 | 0.0438459  | 0.0438864  | 0.416682 | 1.58332 |
| Ato_P13_P14_2_5_3-2_5_4 | 0.0438613  | 0.0439174  | 0.416112 | 1.58389 |
| Ato_P9_P11_2_1_3-2_4_2  | 0.043913   | 0.0439707  | 0.357346 | 1.64265 |
| Ato_P9_P11_2_3_1-2_2_4  | 0.0439209  | 0.043984   | 0.357993 | 1.64201 |
| Ato_P13_P13_3_3_4-3_4_3 | 0.0440004  | 0.044027   | 0.30645  | 1.69355 |
| Ato_P16_P16_3_5_5-5_4_4 | 0.0440193  | 0.044034   | 0.243549 | 1.75645 |
| Ato_P15_P17_4_5_3-4_5_5 | 0.0439755  | 0.0440486  | 0.267304 | 1.7327  |
| Ato_P10_P11_1_4_2-2_2_4 | 0.0440033  | 0.0440491  | 0.281917 | 1.71808 |
| Ato_P10_P11_1_2_4-2_4_2 | 0.0440069  | 0.0440527  | 0.281825 | 1.71818 |
| Ato_P15_P17_4_3_5-4_5_5 | 0.044103   | 0.0440858  | 0.267503 | 1.7325  |

| name                    | $\Delta_l$ | $\Delta_a$ | $c_l$    | $c_a$   |
|-------------------------|------------|------------|----------|---------|
| Ato_P12_P17_2_4_3-5_5_4 | 0.0441085  | 0.0440601  | 0.317457 | 1.68254 |
| Ato_P12_P17_2_3_4-5_4_5 | 0.0440009  | 0.0441222  | 0.318216 | 1.68178 |
| Ato_P9_P16_2_3_1-3_5_5  | 0.0441278  | 0.0441456  | 0.367273 | 1.63273 |
| Ato_P11_P16_2_4_2-4_4_5 | 0.0441428  | 0.0441565  | 0.255579 | 1.74442 |
| Ato_P9_P16_2_1_3-3_5_5  | 0.0440733  | 0.0441591  | 0.368129 | 1.63187 |
| Ato_P11_P16_2_2_4-4_5_4 | 0.0441025  | 0.0441867  | 0.255945 | 1.74406 |
| Ato_P12_P14_3_4_2-3_3_5 | 0.0442212  | 0.0442994  | 0.287296 | 1.7127  |
| Ato_P12_P14_3_2_4-3_5_3 | 0.0441676  | 0.044327   | 0.287005 | 1.71299 |
| Ato_P12_P16_2_3_4-4_4_5 | 0.0443475  | 0.0443607  | 0.313378 | 1.68662 |
| Ato_P12_P16_2_4_3-4_5_4 | 0.0443682  | 0.0443951  | 0.313689 | 1.68631 |
| Ato_P12_P16_2_3_4-5_4_4 | 0.044609   | 0.0446551  | 0.365443 | 1.63456 |
| Ato_P12_P16_2_4_3-5_4_4 | 0.0446718  | 0.044671   | 0.36547  | 1.63453 |
| Ato_P7_P14_1_1_2-2_5_4  | 0.0447388  | 0.0447866  | 0.467735 | 1.53226 |
| Ato_P7_P14_1_2_1-2_4_5  | 0.0447678  | 0.0447878  | 0.467735 | 1.53226 |
| Ato_P13_P14_4_2_4-2_5_4 | 0.0447952  | 0.044803   | 0.237226 | 1.76277 |
| Ato_P9_P14_2_3_1-2_4_5  | 0.0447727  | 0.0448044  | 0.370078 | 1.62992 |
| Ato_P9_P14_2_1_3-2_5_4  | 0.0448051  | 0.0448123  | 0.369962 | 1.63004 |
| Ato_P13_P14_4_4_2-2_4_5 | 0.0448257  | 0.0448178  | 0.236916 | 1.76308 |
| Ato_P13_P14_3_4_3-3_5_3 | 0.0448493  | 0.0449473  | 0.371151 | 1.62885 |
| Ato_P13_P14_3_3_4-3_3_5 | 0.0449493  | 0.0449829  | 0.371208 | 1.62879 |
| Ato_P8_P12_1_2_2-2_3_4  | 0.0452046  | 0.0451983  | 0.283447 | 1.71655 |
| Ato_P8_P12_1_2_2-2_4_3  | 0.0452073  | 0.0452176  | 0.28374  | 1.71626 |
| Ato_P13_P17_3_5_2-4_5_5 | 0.0452275  | 0.0452229  | 0.220071 | 1.77993 |
| Ato_P13_P17_3_2_5-4_5_5 | 0.0452085  | 0.0452425  | 0.220063 | 1.77994 |
| Ato_P6_P11_1_1_1-1_3_4  | 0.0452294  | 0.045258   | 0.348517 | 1.65148 |
| Ato_P6_P11_1_1_1-1_4_3  | 0.0452587  | 0.0452806  | 0.348952 | 1.65105 |
| Ato_P14_P14_3_5_3-3_5_3 | 0.045298   | 0.0453174  | 0.254423 | 1.74558 |
| Ato_P14_P15_2_4_5-2_5_5 | 0.0452875  | 0.0453305  | 0.446622 | 1.55338 |
| Ato_P14_P15_2_5_4-2_5_5 | 0.0453169  | 0.0453416  | 0.445938 | 1.55406 |
| Ato_P6_P8_1_1_1-1_2_2   | 0.0453496  | 0.0453529  | 0.538585 | 1.46142 |
| Ato_P12_P15_3_3_3-3_4_5 | 0.0452837  | 0.0453641  | 0.281928 | 1.71807 |
| Ato_P12_P15_3_3_3-3_5_4 | 0.0453861  | 0.0453708  | 0.281675 | 1.71832 |
| Ato_P11_P13_3_2_3-2_5_3 | 0.0453442  | 0.0454172  | 0.330455 | 1.66955 |
| Ato_P11_P13_3_3_2-2_3_5 | 0.0454271  | 0.0454466  | 0.330593 | 1.66941 |
| Ato_P11_P13_2_3_3-4_3_3 | 0.0456254  | 0.0456309  | 0.307434 | 1.69257 |
| Ato_P9_P11_1_4_1-3_1_4  | 0.0456019  | 0.0456421  | 0.490266 | 1.50973 |
| Ato_P9_P11_1_1_4-3_4_1  | 0.0455572  | 0.0456743  | 0.490816 | 1.50918 |
| Ato_P10_P10_1_4_2-2_1_4 | 0.0457573  | 0.0457964  | 0.48448  | 1.51552 |
| Ato_P10_P10_1_2_4-2_4_1 | 0.0458024  | 0.0458032  | 0.484167 | 1.51583 |

| name                    | $\Delta_l$ | $\Delta_a$ | $c_l$    | $c_a$   |
|-------------------------|------------|------------|----------|---------|
| Ato_P15_P17_3_5_4-5_4_5 | 0.0458375  | 0.045838   | 0.256918 | 1.74308 |
| Ato_P15_P17_3_4_5-5_5_4 | 0.0458324  | 0.0458511  | 0.257128 | 1.74287 |
| Ato_P8_P9_2_2_1-1_2_3   | 0.0459407  | 0.0459924  | 0.476553 | 1.52345 |
| Ato_P8_P9_2_1_2-1_3_2   | 0.0459629  | 0.0459941  | 0.476357 | 1.52364 |
| Ato_P10_P10_1_3_3-2_3_2 | 0.0460103  | 0.0460392  | 0.441653 | 1.55835 |
| Ato_P8_P12_2_1_2-1_4_4  | 0.0460026  | 0.0460417  | 0.471823 | 1.52818 |
| Ato_P10_P10_1_3_3-2_2_3 | 0.0459628  | 0.0460455  | 0.442213 | 1.55779 |
| Ato_P8_P12_2_2_1-1_4_4  | 0.0460377  | 0.046053   | 0.471875 | 1.52812 |
| Ato_P13_P16_3_3_4-4_5_4 | 0.046063   | 0.0460355  | 0.270862 | 1.72914 |
| Ato_P13_P16_3_3_4-4_4_5 | 0.046067   | 0.0460221  | 0.177168 | 1.82283 |
| Ato_P13_P16_3_4_3-4_4_5 | 0.0460345  | 0.0460732  | 0.27115  | 1.72885 |
| Ato_P15_P16_4_4_4-4_4_5 | 0.0460978  | 0.0460935  | 0.3455   | 1.6545  |
| Ato_P13_P15_2_5_3-3_4_5 | 0.0460863  | 0.0461126  | 0.27074  | 1.72926 |
| Ato_P13_P15_2_3_5-3_5_4 | 0.0460957  | 0.0461164  | 0.271136 | 1.72886 |
| Ato_P11_P15_2_2_4-2_5_5 | 0.0461794  | 0.0461413  | 0.648809 | 1.35119 |
| Ato_P15_P16_4_4_4-4_5_4 | 0.0461874  | 0.0461788  | 0.345717 | 1.65428 |
| Ato_P13_P16_3_4_3-4_5_4 | 0.0462486  | 0.04622    | 0.174713 | 1.82529 |
| Ato_P11_P15_2_4_2-2_5_5 | 0.0462385  | 0.0462896  | 0.650726 | 1.34927 |
| Ato_P7_P9_1_1_2-1_2_3   | 0.0463117  | 0.0463384  | 0.610608 | 1.38939 |
| Ato_P7_P9_1_2_1-1_3_2   | 0.046378   | 0.0463556  | 0.610268 | 1.38973 |
| Ato_P8_P10_1_2_2-2_3_2  | 0.0466139  | 0.0466397  | 0.443757 | 1.55624 |
| Ato_P8_P10_1_2_2-2_2_3  | 0.0465318  | 0.0466409  | 0.443699 | 1.5563  |
| Ato_P6_P6_1_1_1-1_1_1   | 0.0466325  | 0.0466544  | 0.719367 | 1.28063 |
| Ato_P11_P14_2_4_2-2_5_4 | 0.0468438  | 0.0468536  | 0.513354 | 1.48665 |
| Ato_P15_P16_4_4_4-5_4_4 | 0.0469737  | 0.046989   | 0.249862 | 1.75014 |
| Ato_P11_P14_2_2_4-2_4_5 | 0.0469713  | 0.0470038  | 0.515154 | 1.48485 |
| Ato_P11_P13_3_2_3-2_4_4 | 0.0470194  | 0.0470315  | 0.291143 | 1.70886 |
| Ato_P11_P15_1_4_3-3_4_5 | 0.0470263  | 0.0470319  | 0.400981 | 1.59902 |
| Ato_P11_P13_3_3_2-2_4_4 | 0.0469204  | 0.0470331  | 0.29147  | 1.70853 |
| Ato_P7_P10_1_1_2-1_3_3  | 0.0471032  | 0.0471006  | 0.898482 | 1.10152 |
| Ato_P7_P10_1_2_1-1_3_3  | 0.0471167  | 0.0471189  | 0.898812 | 1.10119 |
| Ato_P14_P14_2_5_4-4_4_3 | 0.0471062  | 0.0471222  | 0.290421 | 1.70958 |
| Ato_P14_P14_2_4_5-4_3_4 | 0.0471539  | 0.0471434  | 0.290499 | 1.7095  |
| Ato_P8_P14_1_3_1-3_3_5  | 0.0472111  | 0.0471998  | 0.432781 | 1.56722 |
| Ato_P8_P14_1_1_3-3_5_3  | 0.0471996  | 0.0472301  | 0.433504 | 1.5665  |
| Ato_P13_P15_2_4_4-4_3_5 | 0.0472534  | 0.0472827  | 0.295748 | 1.70425 |
| Ato_P13_P15_2_4_4-4_5_3 | 0.0472506  | 0.047285   | 0.295147 | 1.70485 |
| Ato_P12_P15_2_2_5-4_5_3 | 0.0472259  | 0.0473715  | 0.285273 | 1.71473 |
| Ato_P12_P15_2_5_2-4_3_5 | 0.0473723  | 0.0474008  | 0.284924 | 1.71508 |

| name                    | $\Delta_l$ | $\Delta_a$ | $c_l$    | $c_a$   |
|-------------------------|------------|------------|----------|---------|
| Ato_P11_P12_3_2_3-2_4_3 | 0.0474601  | 0.0474739  | 0.287299 | 1.7127  |
| Ato_P11_P12_3_3_2-2_3_4 | 0.0474405  | 0.0474847  | 0.287713 | 1.71229 |
| Ato_P12_P13_2_4_3-2_5_3 | 0.0475538  | 0.0475804  | 0.4551   | 1.5449  |
| Ato_P11_P14_2_2_4-2_5_4 | 0.0477793  | 0.0478876  | 0.362802 | 1.6372  |
| Ato_P11_P14_2_4_2-2_4_5 | 0.0478055  | 0.0478925  | 0.362483 | 1.63752 |
| Ato_P10_P15_2_2_3-2_5_5 | 0.048215   | 0.048238   | 0.366278 | 1.63372 |
| Ato_P10_P15_2_3_2-2_5_5 | 0.0482538  | 0.0482667  | 0.366127 | 1.63387 |
| Ato_P8_P12_1_1_3-3_4_2  | 0.0482884  | 0.0483217  | 0.427549 | 1.57245 |
| Ato_P8_P12_1_3_1-3_2_4  | 0.048241   | 0.0483331  | 0.427903 | 1.5721  |
| Ato_P9_P11_2_2_2-2_3_3  | 0.0482885  | 0.048371   | 0.344895 | 1.65511 |
| Ato_P12_P15_3_3_3-4_4_4 | 0.0485335  | 0.0485979  | 0.314892 | 1.68511 |
| Ato_P9_P13_1_1_4-3_5_2  | 0.0486345  | 0.0486443  | 0.422615 | 1.57738 |
| Ato_P9_P13_1_4_1-3_2_5  | 0.0486218  | 0.0486701  | 0.422703 | 1.5773  |
| Ato_P10_P16_2_2_3-4_5_4 | 0.0487099  | 0.048708   | 0.286585 | 1.71341 |
| Ato_P12_P15_3_2_4-3_4_5 | 0.0486758  | 0.0487121  | 0.248499 | 1.7515  |
| Ato_P12_P15_3_4_2-3_5_4 | 0.0487126  | 0.0487134  | 0.247659 | 1.75234 |
| Ato_P10_P16_2_3_2-4_4_5 | 0.0486828  | 0.0487232  | 0.286971 | 1.71303 |
| Ato_P12_P13_2_5_2-2_3_5 | 0.0486826  | 0.0487705  | 0.352926 | 1.64707 |
| Ato_P14_P16_3_3_5-4_4_5 | 0.0487843  | 0.0487944  | 0.292971 | 1.70703 |
| Ato_P12_P13_2_2_5-2_5_3 | 0.0488034  | 0.0488107  | 0.353287 | 1.64671 |
| Ato_P9_P9_1_2_3-2_2_2   | 0.0488051  | 0.0488347  | 0.461604 | 1.5384  |
| Ato_P9_P9_1_3_2-2_2_2   | 0.0488148  | 0.0488371  | 0.461836 | 1.53816 |
| Ato_P11_P11_2_2_4-2_3_3 | 0.0489504  | 0.0489426  | 0.47084  | 1.52916 |
| Ato_P11_P11_2_3_3-2_4_2 | 0.0489105  | 0.0489812  | 0.471678 | 1.52832 |
| Ato_P8_P13_2_1_2-2_5_3  | 0.0491194  | 0.0491217  | 0.521169 | 1.47883 |
| Ato_P8_P13_2_2_1-2_3_5  | 0.0491091  | 0.0491429  | 0.520444 | 1.47956 |
| Ato_P10_P15_2_2_3-3_4_5 | 0.0491334  | 0.0491482  | 0.434531 | 1.56547 |
| Ato_P12_P17_3_2_4-4_5_5 | 0.0489779  | 0.049149   | 0.280941 | 1.71906 |
| Ato_P12_P17_3_4_2-4_5_5 | 0.0490721  | 0.0491583  | 0.280861 | 1.71914 |
| Ato_P10_P15_2_3_2-3_5_4 | 0.0490776  | 0.0491861  | 0.435207 | 1.56479 |
| Ato_P11_P14_2_4_2-3_4_4 | 0.0493322  | 0.0493376  | 0.470831 | 1.52917 |
| Ato_P11_P14_2_2_4-3_4_4 | 0.0493415  | 0.049341   | 0.470875 | 1.52913 |
| Ato_P8_P11_1_1_3-3_4_1  | 0.0494879  | 0.0494878  | 0.424014 | 1.57599 |
| Ato_P8_P11_1_3_1-3_1_4  | 0.0494097  | 0.0495165  | 0.424612 | 1.57539 |
| Ato_P9_P13_1_2_3-3_5_2  | 0.0495032  | 0.0495284  | 0.479738 | 1.52026 |
| Ato_P9_P13_1_3_2-3_2_5  | 0.0495418  | 0.0494777  | 0.479038 | 1.52096 |
| Ato_P15_P17_3_4_5-4_5_5 | 0.0496421  | 0.0496137  | 0.316951 | 1.68305 |
| Ato_P13_P13_2_4_4-2_5_3 | 0.0497794  | 0.0497795  | 0.293817 | 1.70618 |
| Ato_P13_P13_2_3_5-2_4_4 | 0.0498605  | 0.0498462  | 0.293905 | 1.7061  |



| name                    | $\Delta_l$ | $\Delta_a$ | $c_l$    | $c_a$   |
|-------------------------|------------|------------|----------|---------|
| Ato_P13_P18_2_3_5-5_5_5 | 0.0499012  | 0.0499111  | 0.278937 | 1.72106 |
| Ato_P13_P18_2_5_3-5_5_5 | 0.0499994  | 0.0499062  | 0.278663 | 1.72134 |
| Ato_P12_P13_2_3_4-2_3_5 | 0.0499995  | 0.0500174  | 0.426086 | 1.57391 |
| Ato_P9_P12_1_3_2-3_3_3  | 0.0500462  | 0.0501087  | 0.426726 | 1.57327 |
| Ato_P9_P12_1_2_3-3_3_3  | 0.0500967  | 0.050127   | 0.427336 | 1.57266 |
| Ato_P14_P14_2_5_4-4_2_5 | 0.0501045  | 0.0501506  | 0.293483 | 1.70652 |
| Ato_P8_P15_2_2_1-2_5_5  | 0.0500594  | 0.050185   | 0.250113 | 1.74989 |
| Ato_P10_P13_1_3_3-2_4_4 | 0.0501923  | 0.0501925  | 0.420949 | 1.57905 |
| Ato_P8_P15_2_1_2-2_5_5  | 0.050185   | 0.0501966  | 0.249895 | 1.75011 |
| Ato_P13_P14_2_4_4-3_5_3 | 0.0502256  | 0.050228   | 0.344082 | 1.65592 |
| Ato_P13_P14_2_4_4-3_3_5 | 0.0502366  | 0.0502688  | 0.344235 | 1.65576 |
| Ato_P14_P15_4_4_3-3_4_5 | 0.0502727  | 0.0502734  | 0.269153 | 1.73085 |
| Ato_P13_P14_3_5_2-2_4_5 | 0.0502638  | 0.0503     | 0.339791 | 1.66021 |
| Ato_P13_P14_3_2_5-2_5_4 | 0.0502428  | 0.0503277  | 0.339836 | 1.66016 |
| Ato_P13_P15_3_2_5-3_5_4 | 0.0503073  | 0.0503353  | 0.253452 | 1.74655 |
| Ato_P13_P15_3_5_2-3_4_5 | 0.0503501  | 0.0503551  | 0.253601 | 1.7464  |
| Ato_P6_P11_1_1_1-2_3_3  | 0.0504004  | 0.0504232  | 0.511424 | 1.48858 |
| Ato_P12_P15_1_4_4-3_4_5 | 0.0506703  | 0.0507314  | 0.315486 | 1.68451 |
| Ato_P12_P14_3_2_4-3_4_4 | 0.0507395  | 0.0507873  | 0.291947 | 1.70805 |
| Ato_P12_P14_3_4_2-3_4_4 | 0.0507302  | 0.0508057  | 0.292044 | 1.70796 |
| Ato_P11_P14_2_4_2-4_2_5 | 0.0506784  | 0.0508087  | 0.295519 | 1.70448 |
| Ato_P11_P14_2_2_4-4_5_2 | 0.0508593  | 0.0508627  | 0.295265 | 1.70473 |
| Ato_P13_P13_2_4_4-4_3_3 | 0.0507994  | 0.0509317  | 0.274317 | 1.72568 |
| Ato_P17_P17_4_5_5-5_5_4 | 0.0510202  | 0.0510256  | 0.318381 | 1.68162 |
| Ato_P17_P17_4_5_5-5_4_5 | 0.0509605  | 0.0510525  | 0.318702 | 1.6813  |
| Ato_P13_P15_3_4_3-4_4_4 | 0.0510658  | 0.0510697  | 0.405448 | 1.59455 |
| Ato_P13_P15_3_3_4-4_4_4 | 0.0507418  | 0.0511033  | 0.40738  | 1.59262 |
| Ato_P13_P16_3_2_5-3_5_5 | 0.051137   | 0.0511887  | 0.344346 | 1.65565 |
| Ato_P12_P17_3_3_3-4_5_5 | 0.0512007  | 0.0512073  | 0.315644 | 1.68436 |
| Ato_P13_P16_3_5_2-3_5_5 | 0.0511991  | 0.0512381  | 0.345072 | 1.65493 |
| Ato_P9_P9_1_3_2-2_1_3   | 0.0511669  | 0.0513484  | 0.464514 | 1.53549 |
| Ato_P9_P9_1_2_3-2_3_1   | 0.0513142  | 0.0513562  | 0.464685 | 1.53531 |
| Ato_P11_P14_2_3_3-4_3_4 | 0.0514347  | 0.051381   | 0.459475 | 1.54052 |
| Ato_P12_P16_2_3_4-5_5_3 | 0.0513986  | 0.0514662  | 0.278432 | 1.72157 |
| Ato_P12_P16_2_4_3-5_3_5 | 0.0514764  | 0.051453   | 0.278695 | 1.7213  |
| Ato_P11_P14_2_3_3-4_4_3 | 0.0514928  | 0.0514476  | 0.460258 | 1.53974 |
| Ato_P10_P17_2_3_2-4_5_5 | 0.0514477  | 0.051515   | 0.246031 | 1.75397 |
| Ato_P10_P17_2_2_3-4_5_5 | 0.0513924  | 0.0515395  | 0.246528 | 1.75347 |
| Ato_P12_P13_1_4_4-2_4_4 | 0.0513985  | 0.0515462  | 0.305769 | 1.69423 |

| name                    | $\Delta_l$ | $\Delta_a$ | $c_l$    | $c_a$   |
|-------------------------|------------|------------|----------|---------|
| Ato_P9_P11_2_3_1-1_3_4  | 0.0515614  | 0.0515283  | 0.467954 | 1.53205 |
| Ato_P9_P11_2_1_3-1_4_3  | 0.0515473  | 0.0515758  | 0.467779 | 1.53222 |
| Ato_P9_P14_2_1_3-3_5_3  | 0.051632   | 0.051687   | 0.242181 | 1.75782 |
| Ato_P9_P14_2_3_1-3_3_5  | 0.0516808  | 0.0517032  | 0.241998 | 1.758   |
| Ato_P10_P11_1_2_4-3_3_2 | 0.0517813  | 0.0518538  | 0.391527 | 1.60847 |
| Ato_P10_P11_1_4_2-3_2_3 | 0.051812   | 0.0518561  | 0.391808 | 1.60819 |
| Ato_P13_P15_2_5_3-4_4_4 | 0.0518795  | 0.0518708  | 0.293039 | 1.70696 |
| Ato_P13_P15_2_3_5-4_4_4 | 0.0519419  | 0.0518727  | 0.292686 | 1.70731 |
| Ato_P9_P17_2_2_2-4_5_5  | 0.0518722  | 0.051957   | 0.309309 | 1.69069 |
| Ato_P7_P10_1_2_1-1_2_4  | 0.0519186  | 0.0519594  | 0.218776 | 1.78122 |
| Ato_P7_P10_1_1_2-1_4_2  | 0.0518918  | 0.0519709  | 0.218712 | 1.78129 |
| Ato_P14_P18_3_3_5-5_5_5 | 0.0520141  | 0.0520045  | 0.233668 | 1.76633 |
| Ato_P14_P18_3_5_3-5_5_5 | 0.0520083  | 0.0520159  | 0.233486 | 1.76651 |
| Ato_P10_P16_1_3_3-3_5_5 | 0.0520753  | 0.0520717  | 0.336371 | 1.66363 |
| Ato_P14_P15_4_3_4-3_4_5 | 0.0520393  | 0.052083   | 0.336169 | 1.66383 |
| Ato_P11_P14_1_4_3-3_4_4 | 0.0523785  | 0.0524098  | 0.40243  | 1.59757 |
| Ato_P16_P17_5_4_4-4_5_5 | 0.0522795  | 0.0524858  | 0.25624  | 1.74376 |
| Ato_P10_P11_2_1_4-2_4_2 | 0.0525281  | 0.0526435  | 0.364617 | 1.63538 |
| Ato_P10_P11_2_4_1-2_2_4 | 0.0525733  | 0.052647   | 0.364457 | 1.63554 |
| Ato_P12_P14_2_3_4-4_3_4 | 0.0525984  | 0.0527138  | 0.32239  | 1.67761 |
| Ato_P12_P14_2_4_3-4_4_3 | 0.0527758  | 0.0527349  | 0.322608 | 1.67739 |
| Ato_P13_P15_2_5_3-2_5_5 | 0.052815   | 0.0528397  | 0.421455 | 1.57855 |
| Ato_P11_P12_2_3_3-1_4_4 | 0.0526731  | 0.0529016  | 0.264602 | 1.7354  |
| Ato_P13_P14_3_3_4-4_3_4 | 0.0528361  | 0.0529175  | 0.292001 | 1.708   |
| Ato_P13_P15_2_3_5-2_5_5 | 0.0529317  | 0.0529228  | 0.41493  | 1.58507 |
| Ato_P13_P16_2_4_4-5_5_3 | 0.0529776  | 0.0530478  | 0.271899 | 1.7281  |
| Ato_P13_P16_2_4_4-5_3_5 | 0.0529885  | 0.0530803  | 0.272278 | 1.72772 |
| Ato_P7_P12_2_1_1-1_4_4  | 0.0533399  | 0.0533259  | 0.425297 | 1.5747  |
| Ato_P11_P12_1_4_3-2_3_4 | 0.0534298  | 0.0535045  | 0.218876 | 1.78112 |
| Ato_P11_P12_1_3_4-2_4_3 | 0.0534996  | 0.0535165  | 0.218907 | 1.78109 |
| Ato_P15_P16_3_4_5-5_4_4 | 0.0534824  | 0.0535169  | 0.245518 | 1.75448 |
| Ato_P15_P16_3_5_4-5_4_4 | 0.0535204  | 0.0535566  | 0.241913 | 1.75809 |
| Ato_P9_P12_2_3_1-2_3_4  | 0.0535839  | 0.0536043  | 0.259677 | 1.74032 |
| Ato_P9_P12_2_1_3-2_4_3  | 0.053587   | 0.0536188  | 0.260029 | 1.73997 |
| Ato_P12_P15_2_3_4-3_4_5 | 0.0538064  | 0.0538215  | 0.522985 | 1.47701 |
| Ato_P12_P15_2_4_3-3_5_4 | 0.0537903  | 0.0538242  | 0.522889 | 1.47711 |
| Ato_P13_P14_3_4_3-4_4_3 | 0.0537772  | 0.0538645  | 0.28632  | 1.71368 |
| Ato_P15_P15_4_3_5-4_3_5 | 0.0538624  | 0.0538988  | 0.225403 | 1.7746  |
| Ato_P15_P15_4_5_3-4_5_3 | 0.0539801  | 0.0539742  | 0.225097 | 1.7749  |

| name                    | $\Delta_l$ | $\Delta_a$ | $c_l$    | $c_a$   |
|-------------------------|------------|------------|----------|---------|
| Ato_P6_P9_1_1_1-1_3_2   | 0.0540833  | 0.0540997  | 0.436516 | 1.56348 |
| Ato_P6_P9_1_1_1-1_2_3   | 0.0541202  | 0.0540871  | 0.43651  | 1.56349 |
| Ato_P10_P15_2_2_3-4_5_3 | 0.0541509  | 0.0542238  | 0.322335 | 1.67766 |
| Ato_P10_P15_2_3_2-4_3_5 | 0.0541558  | 0.0542319  | 0.322482 | 1.67752 |
| Ato_P11_P13_1_4_3-3_2_5 | 0.054238   | 0.0542071  | 0.40079  | 1.59921 |
| Ato_P11_P13_1_3_4-3_5_2 | 0.0541345  | 0.0542418  | 0.40093  | 1.59907 |
| Ato_P14_P17_3_3_5-5_5_4 | 0.0543177  | 0.0543362  | 0.247045 | 1.75295 |
| Ato_P14_P17_3_5_3-5_4_5 | 0.054357   | 0.054354   | 0.246917 | 1.75308 |
| Ato_P13_P14_2_3_5-2_5_4 | 0.0543461  | 0.0543673  | 0.317684 | 1.68232 |
| Ato_P13_P14_2_5_3-2_4_5 | 0.0542377  | 0.0544403  | 0.317864 | 1.68214 |
| Ato_P15_P17_4_4_4-5_5_4 | 0.0544776  | 0.0544853  | 0.322292 | 1.67771 |
| Ato_P11_P16_3_2_3-3_5_5 | 0.0544996  | 0.0544938  | 0.333067 | 1.66693 |
| Ato_P11_P16_3_3_2-3_5_5 | 0.0545077  | 0.0545291  | 0.333278 | 1.66672 |
| Ato_P11_P14_2_3_3-3_5_3 | 0.0546966  | 0.0546774  | 0.296915 | 1.70308 |
| Ato_P11_P14_2_3_3-3_3_5 | 0.0546187  | 0.0547366  | 0.297394 | 1.70261 |
| Ato_P15_P17_4_4_4-5_4_5 | 0.0547818  | 0.0548506  | 0.32577  | 1.67423 |
| Ato_P11_P11_1_4_3-2_3_3 | 0.0547144  | 0.0548747  | 0.3291   | 1.6709  |
| Ato_P13_P17_3_4_3-5_5_4 | 0.0549817  | 0.0550015  | 0.205104 | 1.7949  |
| Ato_P16_P16_3_5_5-5_5_3 | 0.0550115  | 0.0550565  | 0.252432 | 1.74757 |
| Ato_P8_P10_2_1_2-1_4_2  | 0.055067   | 0.0551149  | 0.446004 | 1.554   |
| Ato_P8_P10_2_2_1-1_2_4  | 0.0550626  | 0.0551216  | 0.445663 | 1.55434 |
| Ato_P7_P12_1_2_1-2_2_5  | 0.0550767  | 0.0551512  | 0.434309 | 1.56569 |
| Ato_P7_P12_1_1_2-2_5_2  | 0.0551283  | 0.0551558  | 0.433994 | 1.56601 |
| Ato_P15_P16_4_3_5-4_5_4 | 0.0552874  | 0.0553406  | 0.247676 | 1.75232 |
| Ato_P15_P16_4_5_3-4_4_5 | 0.0553455  | 0.0553419  | 0.24739  | 1.75261 |
| Ato_P7_P13_1_1_2-3_4_3  | 0.0554476  | 0.0554386  | 0.394631 | 1.60537 |
| Ato_P13_P15_4_4_2-2_5_5 | 0.0554456  | 0.0554539  | 0.242531 | 1.75747 |
| Ato_P7_P13_1_2_1-3_3_4  | 0.0553628  | 0.0554541  | 0.394839 | 1.60516 |
| Ato_P13_P15_4_2_4-2_5_5 | 0.0553687  | 0.0554763  | 0.242711 | 1.75729 |
| Ato_P10_P13_2_4_1-2_3_5 | 0.0555387  | 0.0555324  | 0.343673 | 1.65633 |
| Ato_P10_P13_2_1_4-2_5_3 | 0.0554737  | 0.0555418  | 0.343892 | 1.65611 |
| Ato_P12_P15_4_3_2-2_5_5 | 0.0555736  | 0.0556001  | 0.263077 | 1.73692 |
| Ato_P6_P14_1_1_1-3_4_4  | 0.0556017  | 0.0556008  | 0.445496 | 1.5545  |
| Ato_P12_P15_4_2_3-2_5_5 | 0.0556081  | 0.0556087  | 0.26286  | 1.73714 |
| Ato_P12_P13_2_4_3-3_2_5 | 0.0555507  | 0.05567    | 0.336423 | 1.66358 |
| Ato_P12_P13_2_3_4-3_5_2 | 0.0556873  | 0.0557181  | 0.336028 | 1.66397 |
| Ato_P12_P15_3_2_4-2_5_5 | 0.0557447  | 0.0557402  | 0.252299 | 1.7477  |
| Ato_P13_P16_2_5_3-3_5_5 | 0.0557447  | 0.0557388  | 0.466637 | 1.53336 |
| Ato_P12_P15_3_4_2-2_5_5 | 0.055705   | 0.0557603  | 0.252494 | 1.74751 |

| name                    | $\Delta_l$ | $\Delta_a$ | $c_l$    | $c_a$   |
|-------------------------|------------|------------|----------|---------|
| Ato_P11_P15_3_3_2-3_4_5 | 0.0557178  | 0.0557659  | 0.340852 | 1.65915 |
| Ato_P13_P16_2_3_5-3_5_5 | 0.0557047  | 0.055772   | 0.467653 | 1.53235 |
| Ato_P11_P15_3_2_3-3_5_4 | 0.0557477  | 0.0557845  | 0.34103  | 1.65897 |
| Ato_P13_P17_3_3_4-5_4_5 | 0.0558436  | 0.0558227  | 0.206298 | 1.7937  |
| Ato_P13_P15_3_4_3-4_3_5 | 0.0558787  | 0.0559073  | 0.271053 | 1.72895 |
| Ato_P13_P15_3_3_4-4_5_3 | 0.0558692  | 0.0559093  | 0.271265 | 1.72874 |
| Ato_P15_P16_3_5_4-5_3_5 | 0.055857   | 0.0559311  | 0.266058 | 1.73394 |
| Ato_P15_P16_3_4_5-5_5_3 | 0.0559141  | 0.0559398  | 0.265988 | 1.73401 |
| Ato_P9_P9_1_2_3-1_3_2   | 0.0559212  | 0.0559913  | 0.321324 | 1.67868 |
| Ato_P13_P17_2_3_5-4_5_5 | 0.0560472  | 0.0560433  | 0.302236 | 1.69776 |
| Ato_P13_P17_2_5_3-4_5_5 | 0.0559336  | 0.0560552  | 0.302648 | 1.69735 |
| Ato_P11_P13_3_4_1-2_3_5 | 0.0560829  | 0.0561571  | 0.25221  | 1.74779 |
| Ato_P11_P13_3_1_4-2_5_3 | 0.0561313  | 0.0561632  | 0.251795 | 1.74821 |
| Ato_P12_P13_3_3_3-2_5_3 | 0.0561404  | 0.0562565  | 0.302873 | 1.69713 |
| Ato_P12_P13_3_3_3-2_3_5 | 0.0562456  | 0.0562567  | 0.302829 | 1.69717 |
| Ato_P6_P15_1_1_1-3_4_5  | 0.0562807  | 0.0562349  | 0.38162  | 1.61838 |
| Ato_P6_P15_1_1_1-3_5_4  | 0.0562237  | 0.056294   | 0.382305 | 1.6177  |
| Ato_P13_P16_3_2_5-4_5_4 | 0.0562036  | 0.0563866  | 0.196222 | 1.80378 |
| Ato_P13_P16_3_5_2-4_4_5 | 0.0563269  | 0.0564076  | 0.19574  | 1.80426 |
| Ato_P9_P13_2_2_2-2_5_3  | 0.0564165  | 0.0563769  | 0.389157 | 1.61084 |
| Ato_P9_P13_2_2_2-2_3_5  | 0.0564359  | 0.0564362  | 0.389474 | 1.61053 |
| Ato_P9_P9_1_3_2-1_3_2   | 0.0565426  | 0.0565182  | 0.535405 | 1.46459 |
| Ato_P9_P14_1_2_3-3_4_4  | 0.0565215  | 0.0565487  | 0.483287 | 1.51671 |
| Ato_P9_P14_1_3_2-3_4_4  | 0.0565522  | 0.0565289  | 0.483145 | 1.51685 |
| Ato_P10_P10_1_2_4-2_3_2 | 0.0565619  | 0.056561   | 0.437962 | 1.56204 |
| Ato_P10_P10_1_4_2-2_2_3 | 0.0565643  | 0.0565785  | 0.438271 | 1.56173 |
| Ato_P12_P16_3_2_4-4_5_4 | 0.0565585  | 0.056588   | 0.234172 | 1.76583 |
| Ato_P12_P16_3_4_2-4_4_5 | 0.0565705  | 0.0566166  | 0.234393 | 1.76561 |
| Ato_P7_P13_1_2_1-3_2_5  | 0.0565651  | 0.0566248  | 0.569584 | 1.43042 |
| Ato_P7_P13_1_1_2-3_5_2  | 0.0566502  | 0.0566185  | 0.568874 | 1.43113 |
| Ato_P6_P12_1_1_1-2_3_4  | 0.0566179  | 0.0566686  | 0.407849 | 1.59215 |
| Ato_P13_P18_3_3_4-5_5_5 | 0.0566352  | 0.0566739  | 0.358452 | 1.64155 |
| Ato_P6_P12_1_1_1-2_4_3  | 0.0566853  | 0.0566668  | 0.407049 | 1.59295 |
| Ato_P13_P18_3_4_3-5_5_5 | 0.0566392  | 0.0566929  | 0.358697 | 1.6413  |
| Ato_P12_P13_3_2_4-2_4_4 | 0.0567421  | 0.056702   | 0.25782  | 1.74218 |
| Ato_P14_P15_3_4_4-4_3_5 | 0.0567568  | 0.0567409  | 0.268343 | 1.73166 |
| Ato_P12_P13_3_4_2-2_4_4 | 0.0567518  | 0.0567571  | 0.258016 | 1.74198 |
| Ato_P11_P13_2_2_4-2_3_5 | 0.0568371  | 0.0568205  | 0.396377 | 1.60362 |
| Ato_P11_P13_2_4_2-2_5_3 | 0.0568645  | 0.0568418  | 0.403277 | 1.59672 |

| name                    | $\Delta_l$ | $\Delta_a$ | $c_l$    | $c_a$   |
|-------------------------|------------|------------|----------|---------|
| Ato_P12_P14_4_3_2-2_4_5 | 0.0567749  | 0.0568818  | 0.340137 | 1.65986 |
| Ato_P12_P14_4_2_3-2_5_4 | 0.0567057  | 0.0569035  | 0.339902 | 1.6601  |
| Ato_P11_P15_2_4_2-3_5_4 | 0.057192   | 0.0571721  | 0.71475  | 1.28525 |
| Ato_P9_P14_2_2_2-3_4_4  | 0.0572791  | 0.0572944  | 0.310697 | 1.6893  |
| Ato_P11_P15_2_2_4-3_4_5 | 0.0572858  | 0.0572949  | 0.714066 | 1.28593 |
| Ato_P13_P15_3_2_5-3_4_5 | 0.0573015  | 0.057273   | 0.273313 | 1.72669 |
| Ato_P13_P15_3_5_2-3_5_4 | 0.0573016  | 0.0572993  | 0.273177 | 1.72682 |
| Ato_P12_P13_3_2_4-3_5_2 | 0.0572005  | 0.0573616  | 0.351774 | 1.64823 |
| Ato_P12_P13_3_4_2-3_2_5 | 0.0573414  | 0.0573676  | 0.350195 | 1.64981 |
| Ato_P10_P13_1_4_2-3_3_4 | 0.0574671  | 0.0574669  | 0.494098 | 1.5059  |
| Ato_P10_P13_1_2_4-3_4_3 | 0.057367   | 0.0574778  | 0.493852 | 1.50615 |
| Ato_P15_P15_3_5_4-4_5_3 | 0.0575363  | 0.057567   | 0.279215 | 1.72078 |
| Ato_P15_P15_3_4_5-4_3_5 | 0.0574687  | 0.0575673  | 0.279414 | 1.72059 |
| Ato_P7_P8_1_1_2-1_3_1   | 0.0578444  | 0.0578436  | 0.576733 | 1.42327 |
| Ato_P7_P8_1_2_1-1_1_3   | 0.0578111  | 0.0578511  | 0.576515 | 1.42348 |
| Ato_P13_P15_3_2_5-4_5_3 | 0.0579621  | 0.0579823  | 0.240399 | 1.7596  |
| Ato_P13_P15_3_5_2-4_3_5 | 0.0580308  | 0.0580313  | 0.240667 | 1.75933 |
| Ato_P9_P9_1_2_3-1_2_3   | 0.0579974  | 0.0580464  | 0.555695 | 1.44431 |
| Ato_P10_P12_2_3_2-1_4_4 | 0.0580397  | 0.0580692  | 0.345892 | 1.65411 |
| Ato_P10_P12_2_2_3-1_4_4 | 0.0580928  | 0.0580751  | 0.345082 | 1.65492 |
| Ato_P9_P12_1_4_1-2_2_5  | 0.0581397  | 0.0581205  | 0.469495 | 1.5305  |
| Ato_P9_P12_1_1_4-2_5_2  | 0.0581001  | 0.0581501  | 0.47047  | 1.52953 |
| Ato_P13_P16_3_5_2-4_5_4 | 0.0583412  | 0.058355   | 0.277999 | 1.722   |
| Ato_P13_P16_3_2_5-4_4_5 | 0.0583356  | 0.0583605  | 0.277361 | 1.72264 |
| Ato_P13_P14_3_4_3-2_5_4 | 0.0586822  | 0.0586816  | 0.306685 | 1.69331 |
| Ato_P13_P14_3_3_4-2_4_5 | 0.0587003  | 0.0586921  | 0.305938 | 1.69406 |
| Ato_P7_P11_1_2_1-1_3_4  | 0.0586486  | 0.058717   | 0.532017 | 1.46798 |
| Ato_P7_P11_1_1_2-1_4_3  | 0.0587124  | 0.0587313  | 0.531512 | 1.46849 |
| Ato_P13_P16_4_3_3-3_5_5 | 0.0587722  | 0.0587729  | 0.276933 | 1.72307 |
| Ato_P9_P9_1_1_4-2_3_1   | 0.0589726  | 0.0590483  | 0.441711 | 1.55829 |
| Ato_P9_P9_1_4_1-2_1_3   | 0.059024   | 0.0590793  | 0.442157 | 1.55784 |
| Ato_P7_P16_1_1_2-3_5_5  | 0.0590888  | 0.0590763  | 0.486941 | 1.51306 |
| Ato_P7_P16_1_2_1-3_5_5  | 0.0591023  | 0.0591308  | 0.487856 | 1.51214 |
| Ato_P7_P13_1_1_2-2_4_4  | 0.0591477  | 0.0591697  | 0.805887 | 1.19411 |
| Ato_P7_P13_1_2_1-2_4_4  | 0.0591732  | 0.0591422  | 0.805886 | 1.19411 |
| Ato_P10_P12_1_3_3-2_4_3 | 0.0591714  | 0.0592088  | 0.362023 | 1.63798 |
| Ato_P10_P12_1_3_3-2_3_4 | 0.0593068  | 0.0593182  | 0.362949 | 1.63705 |
| Ato_P14_P15_3_5_3-2_5_5 | 0.0593802  | 0.0593537  | 0.272963 | 1.72704 |
| Ato_P14_P15_3_3_5-2_5_5 | 0.0593173  | 0.0593972  | 0.273636 | 1.72636 |

| name                    | $\Delta_l$ | $\Delta_a$ | $c_l$    | $c_a$   |
|-------------------------|------------|------------|----------|---------|
| Ato_P14_P15_2_4_5-5_3_4 | 0.0594509  | 0.0545363  | 0.251189 | 1.74881 |
| Ato_P14_P15_2_5_4-5_4_3 | 0.059536   | 0.0545063  | 0.251189 | 1.74881 |
| Ato_P12_P13_3_3_3-3_4_3 | 0.0595408  | 0.0595306  | 0.440507 | 1.55949 |
| Ato_P16_P16_5_4_4-5_4_4 | 0.0594835  | 0.0595745  | 0.29627  | 1.70373 |
| Ato_P12_P13_3_3_3-3_3_4 | 0.0595491  | 0.059604   | 0.441532 | 1.55847 |
| Ato_P13_P13_3_3_4-3_5_2 | 0.05962    | 0.0596732  | 0.2474   | 1.7526  |
| Ato_P13_P13_3_2_5-3_4_3 | 0.0595857  | 0.0597167  | 0.247868 | 1.75213 |
| Ato_P12_P13_2_3_4-4_4_2 | 0.0596863  | 0.0598517  | 0.295268 | 1.70473 |
| Ato_P12_P13_2_4_3-4_2_4 | 0.0597199  | 0.0598619  | 0.295892 | 1.70411 |
| Ato_P8_P13_1_3_1-2_3_5  | 0.0601936  | 0.060206   | 0.462059 | 1.53794 |
| Ato_P10_P14_3_2_2-2_4_5 | 0.060242   | 0.0602202  | 0.316324 | 1.68368 |
| Ato_P8_P13_1_1_3-2_5_3  | 0.0601569  | 0.0602428  | 0.46251  | 1.53749 |
| Ato_P10_P14_3_2_2-2_5_4 | 0.0602095  | 0.0602506  | 0.316902 | 1.6831  |
| Ato_P7_P12_1_1_2-3_4_2  | 0.0602385  | 0.0602587  | 0.42777  | 1.57223 |
| Ato_P10_P13_2_3_2-2_5_3 | 0.0602713  | 0.0602592  | 0.400471 | 1.59953 |
| Ato_P8_P15_1_2_2-2_5_5  | 0.0602296  | 0.0602773  | 0.269153 | 1.73085 |
| Ato_P10_P13_2_2_3-2_3_5 | 0.0603075  | 0.0602712  | 0.398905 | 1.60109 |
| Ato_P7_P12_1_2_1-3_2_4  | 0.0603123  | 0.060256   | 0.427671 | 1.57233 |
| Ato_P10_P13_3_2_2-2_4_4 | 0.0603724  | 0.0603864  | 0.339686 | 1.66031 |
| Ato_P13_P13_2_3_5-2_3_5 | 0.0602646  | 0.0603917  | 0.405453 | 1.59455 |
| Ato_P10_P13_3_1_3-2_5_3 | 0.0603384  | 0.0604362  | 0.355225 | 1.64477 |
| Ato_P10_P13_3_3_1-2_3_5 | 0.0604498  | 0.0604229  | 0.355724 | 1.64428 |
| Ato_P14_P15_2_5_4-4_5_3 | 0.0603909  | 0.0604514  | 0.308677 | 1.69132 |
| Ato_P8_P10_1_2_2-3_2_2  | 0.060447   | 0.0604672  | 0.380237 | 1.61976 |
| Ato_P14_P15_2_4_5-4_3_5 | 0.0603343  | 0.0604745  | 0.309094 | 1.69091 |
| Ato_P11_P14_3_3_2-2_5_4 | 0.0603835  | 0.0604823  | 0.268669 | 1.73133 |
| Ato_P11_P14_3_2_3-2_4_5 | 0.0604416  | 0.0605271  | 0.269153 | 1.73085 |
| Ato_P7_P15_2_1_1-2_5_5  | 0.0605597  | 0.0605497  | 0.457253 | 1.54275 |
| Ato_P12_P13_2_4_3-3_4_3 | 0.060566   | 0.0605716  | 0.438298 | 1.5617  |
| Ato_P12_P13_2_3_4-3_3_4 | 0.0605859  | 0.0606129  | 0.437849 | 1.56215 |
| Ato_P10_P16_2_4_1-3_5_5 | 0.0611145  | 0.0611068  | 0.333959 | 1.66604 |
| Ato_P13_P16_3_4_3-5_4_4 | 0.0611423  | 0.0611377  | 0.334758 | 1.66524 |
| Ato_P8_P10_2_2_1-1_3_3  | 0.0610762  | 0.061185   | 0.404814 | 1.59519 |
| Ato_P8_P10_2_1_2-1_3_3  | 0.0611511  | 0.0612106  | 0.405131 | 1.59487 |
| Ato_P10_P16_2_1_4-3_5_5 | 0.0612138  | 0.0612073  | 0.338944 | 1.66106 |
| Ato_P8_P10_1_2_2-1_3_3  | 0.0612177  | 0.0612653  | 0.417626 | 1.58237 |
| Ato_P9_P13_2_3_1-2_4_4  | 0.0612839  | 0.061297   | 0.383114 | 1.61689 |
| Ato_P9_P13_2_1_3-2_4_4  | 0.0613048  | 0.0612939  | 0.383249 | 1.61675 |
| Ato_P7_P11_1_2_1-2_3_3  | 0.0612924  | 0.0613059  | 0.619662 | 1.38034 |

| name                    | $\Delta_l$ | $\Delta_a$ | $c_l$    | $c_a$   |
|-------------------------|------------|------------|----------|---------|
| Ato_P17_P18_5_5_4-5_5_5 | 0.0612274  | 0.0613125  | 0.29538  | 1.70462 |
| Ato_P17_P18_5_4_5-5_5_5 | 0.0612554  | 0.0613194  | 0.295387 | 1.70461 |
| Ato_P13_P16_3_3_4-5_4_4 | 0.0612308  | 0.0613388  | 0.339759 | 1.66024 |
| Ato_P7_P11_1_1_2-2_3_3  | 0.0613391  | 0.0613438  | 0.618922 | 1.38108 |
| Ato_P12_P13_2_5_2-3_3_4 | 0.0613727  | 0.0613971  | 0.358912 | 1.64109 |
| Ato_P9_P13_1_2_3-2_5_3  | 0.0614048  | 0.0614348  | 0.241379 | 1.75862 |
| Ato_P12_P13_2_2_5-3_4_3 | 0.0614446  | 0.0614298  | 0.358568 | 1.64143 |
| Ato_P11_P17_2_2_4-4_5_5 | 0.0614413  | 0.0614453  | 0.473003 | 1.527   |
| Ato_P9_P13_1_3_2-2_3_5  | 0.06146    | 0.0614488  | 0.241217 | 1.75878 |
| Ato_P11_P17_2_4_2-4_5_5 | 0.0613594  | 0.0614812  | 0.473641 | 1.52636 |
| Ato_P13_P15_4_2_4-3_5_4 | 0.0614903  | 0.0615281  | 0.280083 | 1.71992 |
| Ato_P13_P15_4_4_2-3_4_5 | 0.0614814  | 0.0615312  | 0.280544 | 1.71946 |
| Ato_P12_P13_3_3_3-4_3_3 | 0.0615372  | 0.0615444  | 0.321264 | 1.67874 |
| Ato_P12_P13_3_4_2-3_3_4 | 0.0615925  | 0.0616904  | 0.265924 | 1.73408 |
| Ato_P12_P13_3_2_4-3_4_3 | 0.0617181  | 0.0616648  | 0.265423 | 1.73458 |
| Ato_P9_P14_2_3_1-3_4_4  | 0.0616163  | 0.0617324  | 0.39752  | 1.60248 |
| Ato_P9_P15_2_1_3-2_5_5  | 0.0617523  | 0.061775   | 0.516608 | 1.48339 |
| Ato_P9_P14_2_1_3-3_4_4  | 0.0616612  | 0.061787   | 0.397894 | 1.60211 |
| Ato_P9_P15_2_3_1-2_5_5  | 0.061816   | 0.0618158  | 0.516771 | 1.48323 |
| Ato_P10_P12_1_4_2-2_2_5 | 0.0618477  | 0.0618381  | 0.273317 | 1.72668 |
| Ato_P12_P15_2_3_4-5_3_4 | 0.0618525  | 0.0618546  | 0.26776  | 1.73224 |
| Ato_P12_P14_3_3_3-3_5_3 | 0.0618196  | 0.0618987  | 0.283686 | 1.71631 |
| Ato_P10_P12_1_2_4-2_5_2 | 0.0619038  | 0.0618752  | 0.272804 | 1.7272  |
| Ato_P12_P15_2_4_3-5_4_3 | 0.0618588  | 0.0619077  | 0.268008 | 1.73199 |
| Ato_P12_P14_3_3_3-3_3_5 | 0.0618552  | 0.0619144  | 0.283796 | 1.7162  |
| Ato_P10_P16_3_2_2-3_5_5 | 0.0619449  | 0.0619827  | 0.374022 | 1.62598 |
| Ato_P14_P16_3_5_3-5_3_5 | 0.0619535  | 0.0620672  | 0.242072 | 1.75793 |
| Ato_P14_P16_3_3_5-5_5_3 | 0.0618929  | 0.0620688  | 0.242117 | 1.75788 |
| Ato_P15_P15_4_3_5-4_5_3 | 0.0621073  | 0.0622361  | 0.233662 | 1.76634 |
| Ato_P11_P11_1_4_3-2_2_4 | 0.0623713  | 0.0624197  | 0.321561 | 1.67844 |
| Ato_P10_P10_1_3_3-1_3_3 | 0.0458552  | 0.0625055  | 0.331131 | 1.66887 |
| Ato_P8_P14_1_2_2-3_5_3  | 0.0625143  | 0.062475   | 0.491136 | 1.50886 |
| Ato_P8_P14_1_2_2-3_3_5  | 0.062536   | 0.0624954  | 0.491355 | 1.50864 |
| Ato_P9_P11_1_3_2-2_3_3  | 0.0624772  | 0.06255    | 0.464563 | 1.53544 |
| Ato_P9_P11_1_2_3-2_3_3  | 0.0625113  | 0.0625523  | 0.464266 | 1.53573 |
| Ato_P14_P16_2_4_5-5_3_5 | 0.0626249  | 0.0626606  | 0.284074 | 1.71593 |
| Ato_P14_P16_2_5_4-5_5_3 | 0.062517   | 0.0626637  | 0.284095 | 1.71591 |
| Ato_P16_P18_5_4_4-5_5_5 | 0.0626675  | 0.0627072  | 0.253951 | 1.74605 |
| Ato_P13_P14_3_2_5-3_4_4 | 0.062637   | 0.0627322  | 0.277015 | 1.72298 |

| name                    | $\Delta_l$ | $\Delta_a$ | $c_l$    | $c_a$   |
|-------------------------|------------|------------|----------|---------|
| Ato_P13_P14_3_5_2-3_4_4 | 0.0626952  | 0.0627423  | 0.276999 | 1.723   |
| Ato_P14_P15_4_5_2-2_5_5 | 0.0627711  | 0.0628462  | 0.299071 | 1.70093 |
| Ato_P14_P15_4_2_5-2_5_5 | 0.0628067  | 0.0628638  | 0.298799 | 1.7012  |
| Ato_P14_P17_4_5_2-4_5_5 | 0.0627629  | 0.0629319  | 0.233271 | 1.76673 |
| Ato_P14_P17_4_2_5-4_5_5 | 0.0629325  | 0.0629193  | 0.232727 | 1.76727 |
| Ato_P14_P15_4_4_3-4_5_3 | 0.0628808  | 0.0629441  | 0.333048 | 1.66695 |
| Ato_P10_P12_2_3_2-2_2_5 | 0.0629756  | 0.0630363  | 0.437786 | 1.56221 |
| Ato_P10_P12_2_2_3-2_5_2 | 0.0630115  | 0.0630521  | 0.438301 | 1.5617  |
| Ato_P12_P12_1_4_4-3_4_2 | 0.0630548  | 0.0630608  | 0.41059  | 1.58941 |
| Ato_P12_P18_3_3_3-5_5_5 | 0.0630603  | 0.063061   | 0.316732 | 1.68327 |
| Ato_P8_P13_2_1_2-2_4_4  | 0.0630075  | 0.0630611  | 0.40653  | 1.59347 |
| Ato_P8_P13_2_2_1-2_4_4  | 0.0630225  | 0.0630634  | 0.406508 | 1.59349 |
| Ato_P9_P14_2_2_2-3_3_5  | 0.0630635  | 0.0630757  | 0.37266  | 1.62734 |
| Ato_P12_P12_1_4_4-3_2_4 | 0.0630571  | 0.063076   | 0.410513 | 1.58949 |
| Ato_P12_P16_3_3_3-5_4_4 | 0.0629701  | 0.0630953  | 0.312132 | 1.68787 |
| Ato_P10_P14_2_4_1-3_3_5 | 0.0628847  | 0.0631241  | 0.291735 | 1.70827 |
| Ato_P9_P14_2_2_2-3_5_3  | 0.062956   | 0.0631344  | 0.372524 | 1.62748 |
| Ato_P14_P15_2_4_5-3_4_5 | 0.0631124  | 0.0631646  | 0.35705  | 1.64295 |
| Ato_P14_P15_2_5_4-3_5_4 | 0.0631672  | 0.063157   | 0.357221 | 1.64278 |
| Ato_P10_P14_2_1_4-3_5_3 | 0.063154   | 0.0631783  | 0.291724 | 1.70828 |
| Ato_P9_P14_2_3_1-2_5_4  | 0.0632681  | 0.0633354  | 0.363647 | 1.63635 |
| Ato_P12_P12_2_3_4-2_5_2 | 0.0633327  | 0.063347   | 0.469771 | 1.53023 |
| Ato_P9_P14_2_1_3-2_4_5  | 0.0633581  | 0.0633415  | 0.363838 | 1.63616 |
| Ato_P12_P12_2_2_5-2_4_3 | 0.0633757  | 0.0633516  | 0.469101 | 1.5309  |
| Ato_P13_P16_2_3_5-5_4_4 | 0.0634321  | 0.0634656  | 0.244904 | 1.7551  |
| Ato_P13_P16_2_5_3-5_4_4 | 0.0634658  | 0.0634567  | 0.244891 | 1.75511 |
| Ato_P10_P12_2_3_2-3_2_4 | 0.0635271  | 0.0635342  | 0.323765 | 1.67624 |
| Ato_P10_P12_2_2_3-3_4_2 | 0.0635447  | 0.0635479  | 0.32374  | 1.67626 |
| Ato_P10_P15_2_4_1-3_4_5 | 0.0635764  | 0.0636198  | 0.326764 | 1.67324 |
| Ato_P10_P15_2_1_4-3_5_4 | 0.0635815  | 0.0636208  | 0.325957 | 1.67404 |
| Ato_P14_P14_3_5_3-4_4_3 | 0.063383   | 0.063792   | 0.227258 | 1.77274 |
| Ato_P12_P16_2_2_5-4_5_4 | 0.0637319  | 0.0637947  | 0.296834 | 1.70317 |
| Ato_P12_P16_2_5_2-4_4_5 | 0.0637165  | 0.0638119  | 0.297634 | 1.70237 |
| Ato_P14_P17_3_5_3-5_5_4 | 0.0638364  | 0.0638262  | 0.238364 | 1.76164 |
| Ato_P11_P14_2_2_4-4_4_3 | 0.0637927  | 0.0638841  | 0.263118 | 1.73688 |
| Ato_P11_P14_2_4_2-4_3_4 | 0.0637285  | 0.0638943  | 0.262615 | 1.73738 |
| Ato_P11_P12_2_2_4-3_3_3 | 0.0638654  | 0.0639375  | 0.30777  | 1.69223 |
| Ato_P11_P12_2_4_2-3_3_3 | 0.0639108  | 0.0639567  | 0.308085 | 1.69192 |
| Ato_P13_P14_3_2_5-4_5_2 | 0.0640349  | 0.0641134  | 0.303782 | 1.69622 |



| name                    | $\Delta_l$ | $\Delta_a$ | $c_l$    | $c_a$   |
|-------------------------|------------|------------|----------|---------|
| Ato_P13_P14_3_5_2-4_2_5 | 0.0640498  | 0.0641156  | 0.303346 | 1.69665 |
| Ato_P15_P16_4_3_5-4_4_5 | 0.0641113  | 0.0641248  | 0.297031 | 1.70297 |
| Ato_P15_P16_4_5_3-4_5_4 | 0.0640006  | 0.0641308  | 0.297475 | 1.70253 |
| Ato_P12_P14_2_4_3-4_2_5 | 0.0642466  | 0.0642267  | 0.278322 | 1.72168 |
| Ato_P12_P14_2_3_4-4_5_2 | 0.0640572  | 0.0642686  | 0.27906  | 1.72094 |
| Ato_P11_P17_2_2_4-5_5_4 | 0.064278   | 0.0642594  | 0.254371 | 1.74563 |
| Ato_P11_P17_2_4_2-5_4_5 | 0.0641701  | 0.0643099  | 0.254458 | 1.74554 |
| Ato_P9_P13_2_3_1-3_2_5  | 0.0643245  | 0.0643287  | 0.37469  | 1.62531 |
| Ato_P9_P13_2_1_3-3_5_2  | 0.0642625  | 0.0643315  | 0.374807 | 1.62519 |
| Ato_P8_P11_1_2_2-1_4_3  | 0.0460071  | 0.0645481  | 0.660693 | 1.33931 |
| Ato_P8_P11_1_2_2-1_3_4  | 0.0479392  | 0.0646536  | 0.616595 | 1.3834  |
| Ato_P11_P15_4_2_2-2_5_5 | 0.0647549  | 0.0647872  | 0.394794 | 1.60521 |
| Ato_P8_P12_2_2_1-2_3_4  | 0.0648126  | 0.0648407  | 0.468917 | 1.53108 |
| Ato_P8_P12_2_1_2-2_4_3  | 0.0648283  | 0.0648728  | 0.469621 | 1.53038 |
| Ato_P14_P16_4_3_4-4_4_5 | 0.0650531  | 0.0650372  | 0.286668 | 1.71333 |
| Ato_P12_P16_3_3_3-4_4_5 | 0.0651439  | 0.0651747  | 0.418562 | 1.58144 |
| Ato_P12_P16_3_3_3-4_5_4 | 0.0651213  | 0.0652139  | 0.418091 | 1.58191 |
| Ato_P11_P16_2_2_4-5_5_3 | 0.0652317  | 0.0652183  | 0.278786 | 1.72121 |
| Ato_P11_P16_2_4_2-5_3_5 | 0.0651395  | 0.0652439  | 0.278657 | 1.72134 |
| Ato_P12_P14_3_2_4-3_3_5 | 0.0652025  | 0.0652767  | 0.258295 | 1.74171 |
| Ato_P10_P11_2_2_3-2_2_4 | 0.0651927  | 0.0652934  | 0.436541 | 1.56346 |
| Ato_P12_P14_3_4_2-3_5_3 | 0.0653329  | 0.0652714  | 0.258054 | 1.74195 |
| Ato_P12_P16_2_5_2-3_5_5 | 0.0653109  | 0.0653336  | 0.438623 | 1.56138 |
| Ato_P7_P15_1_2_1-2_5_5  | 0.065505   | 0.0654953  | 0.679417 | 1.32058 |
| Ato_P7_P15_1_1_2-2_5_5  | 0.0655101  | 0.065515   | 0.679709 | 1.32029 |
| Ato_P12_P16_2_2_5-3_5_5 | 0.0655713  | 0.0656068  | 0.441119 | 1.55888 |
| Ato_P10_P11_2_3_2-2_4_2 | 0.0656122  | 0.0656119  | 0.44091  | 1.55909 |
| Ato_P11_P15_2_3_3-4_3_5 | 0.0657054  | 0.0657028  | 0.264417 | 1.73558 |
| Ato_P11_P15_2_3_3-4_5_3 | 0.0656971  | 0.0657189  | 0.26396  | 1.73604 |
| Ato_P11_P12_3_3_2-2_4_3 | 0.0657273  | 0.0657328  | 0.366623 | 1.63338 |
| Ato_P11_P12_3_2_3-2_3_4 | 0.0657967  | 0.0657538  | 0.366581 | 1.63342 |
| Ato_P12_P16_2_2_5-5_5_3 | 0.0657359  | 0.0658019  | 0.260788 | 1.73921 |
| Ato_P12_P16_2_5_2-5_3_5 | 0.065881   | 0.0658115  | 0.260915 | 1.73908 |
| Ato_P13_P13_2_5_3-4_3_3 | 0.0658721  | 0.0658856  | 0.256012 | 1.74399 |
| Ato_P13_P13_2_3_5-4_3_3 | 0.0658686  | 0.0658981  | 0.256497 | 1.7435  |
| Ato_P10_P12_1_3_3-3_4_2 | 0.0659206  | 0.065918   | 0.47536  | 1.52464 |
| Ato_P10_P12_1_3_3-3_2_4 | 0.0659221  | 0.0659282  | 0.475782 | 1.52422 |
| Ato_P12_P14_2_2_5-3_4_4 | 0.0660064  | 0.065895   | 0.364586 | 1.63541 |
| Ato_P12_P12_1_4_4-2_3_4 | 0.0659376  | 0.0660146  | 0.401963 | 1.59804 |

| name                    | $\Delta_l$ | $\Delta_a$ | $c_l$    | $c_a$   |
|-------------------------|------------|------------|----------|---------|
| Ato_P11_P15_2_4_2-4_4_4 | 0.0659859  | 0.0660314  | 0.258407 | 1.74159 |
| Ato_P9_P12_2_2_2-3_3_3  | 0.0660632  | 0.0660895  | 0.398141 | 1.60186 |
| Ato_P13_P13_2_5_3-2_5_3 | 0.0661012  | 0.0660099  | 0.40738  | 1.59262 |
| Ato_P11_P15_2_2_4-4_4_4 | 0.066139   | 0.0660035  | 0.258051 | 1.74195 |
| Ato_P8_P14_2_2_1-2_5_4  | 0.0663059  | 0.0663079  | 0.364934 | 1.63507 |
| Ato_P12_P14_2_5_2-3_4_4 | 0.0663148  | 0.0663122  | 0.369664 | 1.63034 |
| Ato_P8_P14_2_1_2-2_4_5  | 0.0663457  | 0.0663339  | 0.365665 | 1.63434 |
| Ato_P13_P18_3_2_5-5_5_5 | 0.0663238  | 0.0663574  | 0.315049 | 1.68495 |
| Ato_P13_P18_3_5_2-5_5_5 | 0.0663499  | 0.0663636  | 0.315101 | 1.6849  |
| Ato_P11_P14_3_2_3-3_5_3 | 0.0665469  | 0.0665397  | 0.359533 | 1.64047 |
| Ato_P11_P14_3_3_2-3_3_5 | 0.0664991  | 0.0665475  | 0.359874 | 1.64013 |
| Ato_P14_P14_3_4_4-4_4_3 | 0.0665172  | 0.0665644  | 0.401548 | 1.59845 |
| Ato_P9_P14_1_3_2-2_4_5  | 0.0667027  | 0.0667151  | 0.300147 | 1.69985 |
| Ato_P9_P14_1_2_3-2_5_4  | 0.0666426  | 0.0667287  | 0.300369 | 1.69963 |
| Ato_P10_P13_2_3_2-3_4_3 | 0.066934   | 0.0669948  | 0.296372 | 1.70363 |
| Ato_P10_P13_2_2_3-3_3_4 | 0.0669381  | 0.06701    | 0.296173 | 1.70383 |
| Ato_P13_P16_4_4_2-3_5_5 | 0.0671765  | 0.0671842  | 0.223515 | 1.77648 |
| Ato_P13_P16_4_2_4-3_5_5 | 0.0670731  | 0.0672423  | 0.223678 | 1.77632 |
| Ato_P10_P13_1_4_2-2_3_5 | 0.0673346  | 0.0674404  | 0.265389 | 1.73461 |
| Ato_P10_P13_1_2_4-2_5_3 | 0.0674193  | 0.0674976  | 0.265781 | 1.73422 |
| Ato_P15_P16_3_5_4-5_5_3 | 0.0676008  | 0.0676507  | 0.311021 | 1.68898 |
| Ato_P10_P14_3_3_1-2_4_5 | 0.0676919  | 0.0676897  | 0.183    | 1.817   |
| Ato_P16_P16_4_5_4-5_4_4 | 0.0676221  | 0.0677253  | 0.289482 | 1.71052 |
| Ato_P15_P16_3_4_5-5_3_5 | 0.0675432  | 0.067726   | 0.311023 | 1.68898 |
| Ato_P10_P14_3_1_3-2_5_4 | 0.0676649  | 0.0677278  | 0.183239 | 1.81676 |
| Ato_P16_P16_4_4_5-5_4_4 | 0.0677031  | 0.0677393  | 0.29061  | 1.70939 |
| Ato_P11_P11_2_2_4-3_3_2 | 0.0677732  | 0.0677806  | 0.336638 | 1.66336 |
| Ato_P11_P11_2_4_2-3_2_3 | 0.067718   | 0.0678205  | 0.336981 | 1.66302 |
| Ato_P10_P12_2_3_2-3_3_3 | 0.0680572  | 0.0681144  | 0.485767 | 1.51423 |
| Ato_P10_P12_2_2_3-3_3_3 | 0.0680828  | 0.0681358  | 0.4854   | 1.5146  |
| Ato_P13_P15_3_3_4-5_3_4 | 0.0681419  | 0.0681351  | 0.295951 | 1.70405 |
| Ato_P13_P14_3_2_5-3_3_5 | 0.0681454  | 0.0681616  | 0.241787 | 1.75821 |
| Ato_P13_P14_3_5_2-3_5_3 | 0.0680914  | 0.0681737  | 0.242374 | 1.75763 |
| Ato_P11_P15_1_3_4-3_4_5 | 0.0681964  | 0.0682018  | 0.453649 | 1.54635 |
| Ato_P9_P10_1_3_2-1_3_3  | 0.0681892  | 0.0682351  | 0.42483  | 1.57517 |
| Ato_P11_P15_1_4_3-3_5_4 | 0.0681666  | 0.0682505  | 0.454342 | 1.54566 |
| Ato_P13_P15_3_4_3-5_4_3 | 0.0682141  | 0.0682707  | 0.298506 | 1.70149 |
| Ato_P14_P15_3_3_5-4_3_5 | 0.0682553  | 0.0682765  | 0.374214 | 1.62579 |
| Ato_P9_P10_1_2_3-1_3_3  | 0.0683008  | 0.0683036  | 0.428185 | 1.57182 |

| name                    | $\Delta_l$ | $\Delta_a$ | $c_l$    | $c_a$   |
|-------------------------|------------|------------|----------|---------|
| Ato_P9_P9_1_1_4-1_4_1   | 0.0684829  | 0.0685862  | 0.375441 | 1.62456 |
| Ato_P14_P16_4_2_5-4_5_4 | 0.0685156  | 0.0686341  | 0.235291 | 1.76471 |
| Ato_P12_P14_1_4_4-2_5_4 | 0.0686831  | 0.0688418  | 0.221921 | 1.77808 |
| Ato_P12_P14_1_4_4-2_4_5 | 0.0686021  | 0.0688516  | 0.224124 | 1.77588 |
| Ato_P13_P15_3_3_4-4_3_5 | 0.068669   | 0.0689039  | 0.404857 | 1.59514 |
| Ato_P13_P15_3_4_3-4_5_3 | 0.0689188  | 0.0688221  | 0.404911 | 1.59509 |
| Ato_P8_P14_1_2_2-2_4_5  | 0.0688592  | 0.0689457  | 0.297965 | 1.70203 |
| Ato_P8_P10_1_3_1-1_2_4  | 0.0689252  | 0.0689485  | 0.408545 | 1.59146 |
| Ato_P11_P13_1_4_3-3_4_3 | 0.0687889  | 0.0689623  | 0.456722 | 1.54328 |
| Ato_P8_P14_1_2_2-2_5_4  | 0.0688822  | 0.0689715  | 0.298444 | 1.70156 |
| Ato_P8_P10_1_1_3-1_4_2  | 0.068896   | 0.0689974  | 0.408247 | 1.59175 |
| Ato_P7_P14_1_1_2-3_4_4  | 0.0690147  | 0.0690183  | 0.450147 | 1.54985 |
| Ato_P13_P17_2_3_5-5_4_5 | 0.0690177  | 0.0690403  | 0.287678 | 1.71232 |
| Ato_P13_P17_2_5_3-5_5_4 | 0.0690125  | 0.0690415  | 0.287433 | 1.71257 |
| Ato_P7_P14_1_2_1-3_4_4  | 0.069019   | 0.0690449  | 0.450529 | 1.54947 |
| Ato_P12_P14_2_2_5-2_4_5 | 0.0691111  | 0.0691474  | 0.473897 | 1.5261  |
| Ato_P13_P14_4_2_4-3_5_3 | 0.0691572  | 0.0691498  | 0.316955 | 1.68305 |
| Ato_P13_P14_4_4_2-3_3_5 | 0.0691927  | 0.069155   | 0.317268 | 1.68273 |
| Ato_P11_P18_2_2_4-5_5_5 | 0.0692196  | 0.0692384  | 0.256757 | 1.74324 |
| Ato_P11_P18_2_4_2-5_5_5 | 0.0692461  | 0.0692492  | 0.257003 | 1.743   |
| Ato_P13_P15_2_5_3-5_3_4 | 0.0692988  | 0.0509708  | 0.190546 | 1.80945 |
| Ato_P12_P14_2_5_2-2_5_4 | 0.069233   | 0.0693346  | 0.474348 | 1.52565 |
| Ato_P13_P15_2_4_4-5_3_4 | 0.0693411  | 0.0693258  | 0.298496 | 1.7015  |
| Ato_P12_P15_2_5_2-3_4_5 | 0.0692457  | 0.0693521  | 0.317864 | 1.68214 |
| Ato_P12_P15_2_2_5-3_5_4 | 0.0693575  | 0.0693262  | 0.317533 | 1.68247 |
| Ato_P12_P13_2_4_3-4_3_3 | 0.0693486  | 0.0693652  | 0.292992 | 1.70701 |
| Ato_P13_P15_2_4_4-5_4_3 | 0.0693711  | 0.0693542  | 0.298547 | 1.70145 |
| Ato_P12_P15_3_4_2-4_3_5 | 0.0692843  | 0.0693993  | 0.248886 | 1.75111 |
| Ato_P9_P12_1_2_3-2_5_2  | 0.0694125  | 0.0693988  | 0.408969 | 1.59103 |
| Ato_P12_P15_3_2_4-4_5_3 | 0.0692333  | 0.0694164  | 0.248751 | 1.75125 |
| Ato_P9_P12_1_3_2-2_2_5  | 0.0694013  | 0.0694393  | 0.409236 | 1.59076 |
| Ato_P12_P13_4_3_2-2_3_5 | 0.0694226  | 0.069564   | 0.357654 | 1.64235 |
| Ato_P13_P15_2_3_5-5_4_3 | 0.0695659  | 0.050984   | 0.190546 | 1.80945 |
| Ato_P11_P14_3_1_4-3_5_3 | 0.069527   | 0.0695681  | 0.236886 | 1.76311 |
| Ato_P13_P13_2_4_4-4_2_4 | 0.0695837  | 0.0695199  | 0.252218 | 1.74778 |
| Ato_P11_P14_3_4_1-3_3_5 | 0.0694031  | 0.0695919  | 0.237478 | 1.76252 |
| Ato_P13_P13_2_4_4-4_4_2 | 0.0695482  | 0.0696089  | 0.252093 | 1.74791 |
| Ato_P12_P13_4_2_3-2_5_3 | 0.0695008  | 0.069637   | 0.35684  | 1.64316 |
| Ato_P13_P14_4_3_3-3_4_4 | 0.0697713  | 0.0697536  | 0.314745 | 1.68526 |

| name                    | $\Delta_l$ | $\Delta_a$ | $c_l$    | $c_a$   |
|-------------------------|------------|------------|----------|---------|
| Ato_P15_P16_5_4_3-3_5_5 | 0.0697811  | 0.0698415  | 0.274588 | 1.72541 |
| Ato_P15_P16_5_3_4-3_5_5 | 0.0698425  | 0.0698385  | 0.274362 | 1.72564 |
| Ato_P16_P17_5_3_5-4_5_5 | 0.0698689  | 0.069843   | 0.272628 | 1.72737 |
| Ato_P16_P17_5_5_3-4_5_5 | 0.0698514  | 0.0699055  | 0.272745 | 1.72725 |
| Ato_P11_P11_2_4_2-3_1_4 | 0.0699915  | 0.0699908  | 0.312022 | 1.68798 |
| Ato_P11_P11_2_2_4-3_4_1 | 0.0700122  | 0.0700441  | 0.312841 | 1.68716 |
| Ato_P12_P13_2_5_2-4_2_4 | 0.070016   | 0.0700672  | 0.326216 | 1.67378 |
| Ato_P16_P17_4_5_4-5_4_5 | 0.0700243  | 0.0700779  | 0.307775 | 1.69222 |
| Ato_P16_P17_4_4_5-5_5_4 | 0.0700692  | 0.0700782  | 0.307419 | 1.69258 |
| Ato_P12_P13_2_2_5-4_4_2 | 0.0700643  | 0.0701099  | 0.326555 | 1.67344 |
| Ato_P12_P13_2_3_4-4_3_3 | 0.0701023  | 0.0701602  | 0.31247  | 1.68753 |
| Ato_P15_P18_4_3_5-5_5_5 | 0.0700778  | 0.0702263  | 0.24564  | 1.75436 |
| Ato_P15_P18_4_5_3-5_5_5 | 0.0702403  | 0.0702471  | 0.245907 | 1.75409 |
| Ato_P12_P17_2_5_2-5_4_5 | 0.0702294  | 0.0702945  | 0.239846 | 1.76015 |
| Ato_P12_P17_2_2_5-5_5_4 | 0.0703272  | 0.0702612  | 0.239954 | 1.76005 |
| Ato_P12_P16_3_4_2-4_5_4 | 0.0703236  | 0.0703549  | 0.304896 | 1.6951  |
| Ato_P12_P16_3_2_4-4_4_5 | 0.0703856  | 0.0703536  | 0.304207 | 1.69579 |
| Ato_P12_P14_1_4_4-3_3_5 | 0.0703899  | 0.0704096  | 0.330542 | 1.66946 |
| Ato_P13_P14_2_5_3-3_4_4 | 0.0704299  | 0.0704297  | 0.360358 | 1.63964 |
| Ato_P12_P14_1_4_4-3_5_3 | 0.0703898  | 0.070462   | 0.330562 | 1.66944 |
| Ato_P13_P14_2_3_5-3_4_4 | 0.0705018  | 0.0704808  | 0.360399 | 1.6396  |
| Ato_P12_P13_3_2_4-3_3_4 | 0.0705028  | 0.0705043  | 0.302762 | 1.69724 |
| Ato_P8_P9_1_3_1-1_1_4   | 0.0704102  | 0.0705143  | 0.4419   | 1.5581  |
| Ato_P12_P13_3_4_2-3_4_3 | 0.0703335  | 0.0705263  | 0.302965 | 1.69703 |
| Ato_P8_P9_1_1_3-1_4_1   | 0.0705388  | 0.0705162  | 0.441399 | 1.5586  |
| Ato_P13_P15_2_5_3-3_5_4 | 0.0704826  | 0.0705388  | 0.603171 | 1.39683 |
| Ato_P13_P15_2_3_5-3_4_5 | 0.0705494  | 0.0705723  | 0.602358 | 1.39764 |
| Ato_P11_P14_3_2_3-3_4_4 | 0.0705333  | 0.0705863  | 0.290713 | 1.70929 |
| Ato_P11_P14_3_3_2-3_4_4 | 0.0705872  | 0.0705853  | 0.290492 | 1.70951 |
| Ato_P12_P16_2_4_3-5_5_3 | 0.0705039  | 0.0705901  | 0.314242 | 1.68576 |
| Ato_P14_P16_4_2_5-3_5_5 | 0.070524   | 0.0706211  | 0.185225 | 1.81477 |
| Ato_P12_P16_2_3_4-5_3_5 | 0.070417   | 0.0706308  | 0.3137   | 1.6863  |
| Ato_P9_P11_2_2_2-2_2_4  | 0.0707121  | 0.0707051  | 0.336996 | 1.663   |
| Ato_P9_P11_2_2_2-2_4_2  | 0.0706093  | 0.0707141  | 0.337659 | 1.66234 |
| Ato_P11_P13_2_2_4-4_4_2 | 0.0708022  | 0.0708064  | 0.335814 | 1.66419 |
| Ato_P11_P13_2_4_2-4_2_4 | 0.0707986  | 0.0708107  | 0.336318 | 1.66368 |
| Ato_P8_P10_1_3_1-2_2_3  | 0.0707855  | 0.0708612  | 0.463188 | 1.53681 |
| Ato_P8_P10_1_1_3-2_3_2  | 0.0707822  | 0.0708787  | 0.462716 | 1.53728 |
| Ato_P12_P12_3_2_4-3_4_2 | 0.0708767  | 0.0709058  | 0.311423 | 1.68858 |

| name                    | $\Delta_l$ | $\Delta_a$ | $c_l$    | $c_a$   |
|-------------------------|------------|------------|----------|---------|
| Ato_P12_P14_3_3_3-4_4_3 | 0.0709879  | 0.071019   | 0.411689 | 1.58831 |
| Ato_P12_P14_3_3_3-4_3_4 | 0.0709592  | 0.0710341  | 0.411879 | 1.58812 |
| Ato_P15_P15_4_3_5-4_4_4 | 0.0709787  | 0.0710937  | 0.30817  | 1.69183 |
| Ato_P15_P15_4_4_4-4_5_3 | 0.0711108  | 0.0710944  | 0.307922 | 1.69208 |
| Ato_P9_P16_1_2_3-3_5_5  | 0.0711185  | 0.0711164  | 0.386459 | 1.61354 |
| Ato_P9_P16_1_3_2-3_5_5  | 0.0710194  | 0.0711441  | 0.387239 | 1.61276 |
| Ato_P10_P13_2_2_3-3_5_2 | 0.0711511  | 0.0712936  | 0.298865 | 1.70113 |
| Ato_P10_P13_2_3_2-3_2_5 | 0.0712413  | 0.071304   | 0.298636 | 1.70136 |
| Ato_P9_P11_1_1_4-2_4_2  | 0.0715312  | 0.0716506  | 0.494851 | 1.50515 |
| Ato_P9_P11_1_4_1-2_2_4  | 0.0716086  | 0.071662   | 0.494685 | 1.50532 |
| Ato_P14_P17_4_4_3-4_5_5 | 0.0715967  | 0.0717271  | 0.290582 | 1.70942 |
| Ato_P10_P14_2_3_2-3_5_3 | 0.0717696  | 0.0717687  | 0.372648 | 1.62735 |
| Ato_P9_P13_2_1_3-3_4_3  | 0.071738   | 0.0717739  | 0.27688  | 1.72312 |
| Ato_P9_P13_2_3_1-3_3_4  | 0.0715815  | 0.0717776  | 0.277647 | 1.72235 |
| Ato_P11_P13_1_3_4-2_4_4 | 0.0717746  | 0.0718479  | 0.448433 | 1.55157 |
| Ato_P12_P13_4_4_1-2_3_5 | 0.0717188  | 0.0718758  | 0.237346 | 1.76265 |
| Ato_P12_P13_4_1_4-2_5_3 | 0.0718655  | 0.0718904  | 0.237183 | 1.76282 |
| Ato_P10_P14_2_2_3-3_3_5 | 0.0718797  | 0.0719588  | 0.373721 | 1.62628 |
| Ato_P8_P10_1_2_2-1_4_2  | 0.0719522  | 0.0719742  | 0.55693  | 1.44307 |
| Ato_P9_P10_2_1_3-2_4_1  | 0.0720318  | 0.072106   | 0.50019  | 1.49981 |
| Ato_P9_P10_2_3_1-2_1_4  | 0.0720535  | 0.0721251  | 0.500101 | 1.4999  |
| Ato_P9_P15_2_1_3-3_4_5  | 0.0720696  | 0.0721278  | 0.441207 | 1.55879 |
| Ato_P10_P14_2_4_1-3_4_4 | 0.0721239  | 0.0721287  | 0.274392 | 1.72561 |
| Ato_P9_P15_2_3_1-3_5_4  | 0.0721086  | 0.0721331  | 0.441488 | 1.55851 |
| Ato_P10_P14_2_1_4-3_4_4 | 0.0720577  | 0.072135   | 0.274495 | 1.72551 |
| Ato_P11_P13_1_4_3-2_4_4 | 0.072135   | 0.0721472  | 0.450422 | 1.54958 |
| Ato_P8_P16_2_1_2-3_5_5  | 0.0721944  | 0.0721937  | 0.449166 | 1.55083 |
| Ato_P8_P16_2_2_1-3_5_5  | 0.0722232  | 0.0721761  | 0.448752 | 1.55125 |
| Ato_P12_P14_2_5_2-4_3_4 | 0.0721767  | 0.0722355  | 0.277582 | 1.72242 |
| Ato_P12_P14_2_2_5-4_4_3 | 0.0721231  | 0.072243   | 0.278003 | 1.722   |
| Ato_P13_P17_3_4_3-5_4_5 | 0.072204   | 0.0723316  | 0.324777 | 1.67522 |
| Ato_P13_P17_3_3_4-5_5_4 | 0.072325   | 0.0723358  | 0.324409 | 1.67559 |
| Ato_P10_P12_2_4_1-3_2_4 | 0.0723489  | 0.0724048  | 0.390838 | 1.60916 |
| Ato_P10_P12_2_1_4-3_4_2 | 0.0723347  | 0.0724057  | 0.39142  | 1.60858 |
| Ato_P11_P14_3_1_4-2_5_4 | 0.072416   | 0.0724152  | 0.258054 | 1.74195 |
| Ato_P11_P14_3_4_1-2_4_5 | 0.0723527  | 0.072444   | 0.25828  | 1.74172 |
| Ato_P8_P11_1_2_2-3_3_2  | 0.0724608  | 0.0724854  | 0.548946 | 1.45105 |
| Ato_P8_P11_1_2_2-3_2_3  | 0.0724379  | 0.0724893  | 0.549334 | 1.45067 |
| Ato_P13_P15_3_5_2-4_4_4 | 0.072507   | 0.0724773  | 0.230233 | 1.76977 |

| name                    | $\Delta_l$ | $\Delta_a$ | $c_l$    | $c_a$   |
|-------------------------|------------|------------|----------|---------|
| Ato_P13_P15_3_2_5-4_4_4 | 0.0725201  | 0.0725025  | 0.230665 | 1.76933 |
| Ato_P11_P13_2_4_2-3_4_3 | 0.0725244  | 0.0725255  | 0.59726  | 1.40274 |
| Ato_P7_P7_1_2_1-1_2_1   | 0.0725543  | 0.0725524  | 0.470427 | 1.52957 |
| Ato_P11_P13_2_2_4-3_3_4 | 0.0724971  | 0.0725545  | 0.597288 | 1.40271 |
| Ato_P12_P12_2_5_2-4_1_4 | 0.0726064  | 0.0725781  | 0.408578 | 1.59142 |
| Ato_P12_P12_2_2_5-4_4_1 | 0.0725341  | 0.0726155  | 0.409107 | 1.59089 |
| Ato_P16_P16_5_3_5-5_3_5 | 0.0727854  | 0.0727966  | 0.221309 | 1.77869 |
| Ato_P16_P16_5_5_3-5_5_3 | 0.0726662  | 0.072802   | 0.221407 | 1.77859 |
| Ato_P9_P10_1_2_3-3_2_2  | 0.0728042  | 0.0727751  | 0.3671   | 1.6329  |
| Ato_P9_P12_2_3_1-2_4_3  | 0.0728369  | 0.0728431  | 0.292873 | 1.70713 |
| Ato_P9_P10_1_3_2-3_2_2  | 0.0728484  | 0.072815   | 0.367331 | 1.63267 |
| Ato_P9_P12_2_1_3-2_3_4  | 0.0726782  | 0.072877   | 0.292604 | 1.7074  |
| Ato_P10_P15_2_4_1-2_5_5 | 0.0728516  | 0.072924   | 0.610888 | 1.38911 |
| Ato_P13_P17_3_5_2-5_4_5 | 0.0728479  | 0.0729881  | 0.242874 | 1.75713 |
| Ato_P13_P17_3_2_5-5_5_4 | 0.0728883  | 0.0729891  | 0.242836 | 1.75716 |
| Ato_P12_P15_2_4_3-4_5_3 | 0.073081   | 0.0730295  | 0.280627 | 1.71937 |
| Ato_P12_P15_2_3_4-4_3_5 | 0.0730895  | 0.073095   | 0.281463 | 1.71854 |
| Ato_P8_P13_1_3_1-3_3_4  | 0.0731292  | 0.073197   | 0.371694 | 1.62831 |
| Ato_P8_P13_1_1_3-3_4_3  | 0.0731976  | 0.0731998  | 0.371868 | 1.62813 |
| Ato_P10_P15_2_1_4-2_5_5 | 0.0731918  | 0.0732266  | 0.604053 | 1.39595 |
| Ato_P10_P15_2_1_4-4_5_3 | 0.0731945  | 0.0732334  | 0.318155 | 1.68185 |
| Ato_P10_P15_2_4_1-4_3_5 | 0.0731819  | 0.0732924  | 0.319175 | 1.68082 |
| Ato_P13_P16_2_5_3-4_5_4 | 0.0732763  | 0.0732943  | 0.345039 | 1.65496 |
| Ato_P13_P16_2_3_5-4_4_5 | 0.0732381  | 0.0733089  | 0.344719 | 1.65528 |
| Ato_P11_P13_3_1_4-3_5_2 | 0.073332   | 0.0734359  | 0.341866 | 1.65813 |
| Ato_P14_P16_4_2_5-4_4_5 | 0.0730187  | 0.0734547  | 0.229831 | 1.77017 |
| Ato_P14_P18_4_5_2-5_5_5 | 0.0734593  | 0.0734421  | 0.209361 | 1.79064 |
| Ato_P11_P13_3_4_1-3_2_5 | 0.073474   | 0.0734549  | 0.342245 | 1.65776 |
| Ato_P14_P18_4_2_5-5_5_5 | 0.0734862  | 0.0735062  | 0.20986  | 1.79014 |
| Ato_P11_P14_2_3_3-5_3_3 | 0.0734776  | 0.0735294  | 0.297915 | 1.70208 |
| Ato_P7_P11_1_1_2-1_3_4  | 0.0736202  | 0.0735759  | 0.3207   | 1.6793  |
| Ato_P10_P12_3_1_3-2_5_2 | 0.0735668  | 0.0736281  | 0.46848  | 1.53152 |
| Ato_P10_P12_3_3_1-2_2_5 | 0.0734795  | 0.0736308  | 0.468583 | 1.53142 |
| Ato_P11_P15_3_2_3-3_4_5 | 0.0736079  | 0.0737322  | 0.354813 | 1.64519 |
| Ato_P11_P15_3_3_2-3_5_4 | 0.0737333  | 0.0737217  | 0.354576 | 1.64542 |
| Ato_P13_P13_3_2_5-3_3_4 | 0.0737335  | 0.0737035  | 0.305123 | 1.69488 |
| Ato_P14_P15_3_5_3-5_2_5 | 0.0736956  | 0.0737339  | 0.272911 | 1.72709 |
| Ato_P14_P16_3_4_4-5_5_3 | 0.0737744  | 0.0737444  | 0.316195 | 1.68381 |
| Ato_P13_P13_3_4_3-3_5_2 | 0.0736182  | 0.0737754  | 0.305056 | 1.69494 |

| name                    | $\Delta_l$ | $\Delta_a$ | $c_l$    | $c_a$   |
|-------------------------|------------|------------|----------|---------|
| Ato_P14_P15_3_3_5-5_5_2 | 0.0736736  | 0.0738052  | 0.273866 | 1.72613 |
| Ato_P14_P17_4_4_3-5_5_4 | 0.073797   | 0.0738619  | 0.251712 | 1.74829 |
| Ato_P10_P14_2_1_4-4_5_2 | 0.0738959  | 0.0738274  | 0.346861 | 1.65314 |
| Ato_P10_P14_2_4_1-4_2_5 | 0.0739322  | 0.0738389  | 0.347055 | 1.65295 |
| Ato_P13_P13_2_4_4-3_2_5 | 0.0739127  | 0.0740135  | 0.346437 | 1.65356 |
| Ato_P13_P13_2_4_4-3_5_2 | 0.0740216  | 0.073998   | 0.346753 | 1.65325 |
| Ato_P10_P15_2_3_2-4_4_4 | 0.0740064  | 0.074028   | 0.404111 | 1.59589 |
| Ato_P10_P15_2_2_3-4_4_4 | 0.0739693  | 0.0740549  | 0.40414  | 1.59586 |
| Ato_P7_P11_1_2_1-1_4_3  | 0.0740643  | 0.074073   | 0.326804 | 1.6732  |
| Ato_P13_P16_3_3_4-5_3_5 | 0.0741457  | 0.0742043  | 0.310645 | 1.68936 |
| Ato_P14_P17_4_3_4-5_4_5 | 0.0742186  | 0.0742042  | 0.257961 | 1.74204 |
| Ato_P12_P15_3_2_4-4_4_4 | 0.0742456  | 0.0742212  | 0.269153 | 1.73085 |
| Ato_P15_P17_4_5_3-5_5_4 | 0.0743008  | 0.0742653  | 0.284181 | 1.71582 |
| Ato_P12_P15_3_4_2-4_4_4 | 0.0743134  | 0.0742732  | 0.269153 | 1.73085 |
| Ato_P10_P16_2_2_3-4_4_5 | 0.0743043  | 0.0743197  | 0.265678 | 1.73432 |
| Ato_P10_P16_2_3_2-4_5_4 | 0.0743155  | 0.0743379  | 0.265731 | 1.73427 |
| Ato_P15_P17_4_3_5-5_4_5 | 0.0741972  | 0.0743395  | 0.282714 | 1.71729 |
| Ato_P11_P15_3_1_4-3_5_4 | 0.0742926  | 0.0744147  | 0.194039 | 1.80596 |
| Ato_P11_P15_3_4_1-3_4_5 | 0.0744196  | 0.0743673  | 0.193681 | 1.80632 |
| Ato_P12_P15_2_2_5-2_5_5 | 0.0744381  | 0.0744139  | 0.461936 | 1.53806 |
| Ato_P11_P15_2_3_3-5_4_3 | 0.0745011  | 0.0745324  | 0.308131 | 1.69187 |
| Ato_P7_P10_2_1_1-1_3_3  | 0.0745852  | 0.074546   | 0.48889  | 1.51111 |
| Ato_P12_P15_2_5_2-2_5_5 | 0.0746065  | 0.0746181  | 0.453733 | 1.54627 |
| Ato_P10_P15_3_2_2-3_4_5 | 0.0746204  | 0.0745999  | 0.361416 | 1.63858 |
| Ato_P10_P15_3_2_2-3_5_4 | 0.0745529  | 0.0746387  | 0.361471 | 1.63853 |
| Ato_P13_P17_4_2_4-4_5_5 | 0.0746567  | 0.0746793  | 0.268397 | 1.7316  |
| Ato_P13_P14_2_5_3-4_4_3 | 0.0745724  | 0.0746883  | 0.290713 | 1.70929 |
| Ato_P13_P14_2_3_5-4_3_4 | 0.0745921  | 0.0746965  | 0.290961 | 1.70904 |
| Ato_P13_P17_4_4_2-4_5_5 | 0.0746743  | 0.074717   | 0.268291 | 1.73171 |
| Ato_P8_P10_1_2_2-1_2_4  | 0.0747438  | 0.0747574  | 0.57475  | 1.42525 |
| Ato_P11_P15_2_3_3-5_3_4 | 0.0746974  | 0.074787   | 0.315742 | 1.68426 |
| Ato_P10_P11_2_4_1-3_1_4 | 0.0748059  | 0.0748481  | 0.442662 | 1.55734 |
| Ato_P10_P11_2_1_4-3_4_1 | 0.0748615  | 0.0748462  | 0.443418 | 1.55658 |
| Ato_P9_P18_2_2_2-5_5_5  | 0.0747424  | 0.0748883  | 0.329101 | 1.6709  |
| Ato_P13_P16_3_4_3-5_5_3 | 0.0748546  | 0.0748884  | 0.312915 | 1.68708 |
| Ato_P9_P16_2_2_2-4_5_4  | 0.074821   | 0.0749187  | 0.333471 | 1.66653 |
| Ato_P10_P15_1_4_2-3_4_5 | 0.0749056  | 0.0749418  | 0.432583 | 1.56742 |
| Ato_P10_P15_1_2_4-3_5_4 | 0.0749388  | 0.0749446  | 0.43223  | 1.56777 |
| Ato_P9_P16_2_2_2-4_4_5  | 0.0749467  | 0.0749458  | 0.333137 | 1.66686 |

| name                    | $\Delta_l$ | $\Delta_a$ | $c_l$    | $c_a$   |
|-------------------------|------------|------------|----------|---------|
| Ato_P12_P15_2_4_3-5_3_4 | 0.075149   | 0.0751607  | 0.29889  | 1.70111 |
| Ato_P12_P15_2_3_4-5_4_3 | 0.07517    | 0.0752181  | 0.298729 | 1.70127 |
| Ato_P8_P15_2_2_1-3_4_5  | 0.0753208  | 0.0754021  | 0.50895  | 1.49105 |
| Ato_P11_P16_2_3_3-5_3_5 | 0.0753416  | 0.0754126  | 0.361583 | 1.63842 |
| Ato_P8_P15_2_1_2-3_5_4  | 0.0754168  | 0.0754216  | 0.509044 | 1.49096 |
| Ato_P11_P16_2_3_3-5_5_3 | 0.0754446  | 0.0753707  | 0.360889 | 1.63911 |
| Ato_P11_P16_3_4_1-4_4_5 | 0.0755886  | 0.0756104  | 0.217769 | 1.78223 |
| Ato_P11_P16_3_1_4-4_5_4 | 0.0755811  | 0.0756115  | 0.217783 | 1.78222 |
| Ato_P9_P11_1_2_3-3_4_1  | 0.0757777  | 0.0758599  | 0.488373 | 1.51163 |
| Ato_P12_P12_2_2_5-2_3_4 | 0.0758839  | 0.0757839  | 0.475703 | 1.5243  |
| Ato_P9_P11_1_3_2-3_1_4  | 0.0757245  | 0.075889   | 0.488468 | 1.51153 |
| Ato_P12_P13_4_3_2-2_4_4 | 0.0758792  | 0.0759017  | 0.30709  | 1.69291 |
| Ato_P12_P13_4_2_3-2_4_4 | 0.075802   | 0.0759205  | 0.30672  | 1.69328 |
| Ato_P9_P10_2_1_3-2_3_2  | 0.0757836  | 0.0759623  | 0.320219 | 1.67978 |
| Ato_P9_P10_2_3_1-2_2_3  | 0.075736   | 0.075973   | 0.320724 | 1.67928 |
| Ato_P12_P12_2_4_3-2_5_2 | 0.0760459  | 0.0760908  | 0.477957 | 1.52204 |
| Ato_P9_P11_2_3_1-2_3_3  | 0.0760086  | 0.0761313  | 0.330609 | 1.66939 |
| Ato_P9_P11_2_1_3-2_3_3  | 0.0759189  | 0.0761478  | 0.330128 | 1.66987 |
| Ato_P11_P17_3_4_1-4_5_5 | 0.0760071  | 0.0761497  | 0.20902  | 1.79098 |
| Ato_P15_P15_3_5_4-5_2_5 | 0.0761212  | 0.0761621  | 0.208793 | 1.79121 |
| Ato_P15_P15_3_4_5-5_5_2 | 0.0761514  | 0.0761968  | 0.209082 | 1.79092 |
| Ato_P10_P14_2_4_1-2_4_5 | 0.0761635  | 0.0762413  | 0.47203  | 1.52797 |
| Ato_P10_P14_2_1_4-2_5_4 | 0.0762719  | 0.0762781  | 0.47179  | 1.52821 |
| Ato_P11_P17_3_1_4-4_5_5 | 0.0762887  | 0.0761693  | 0.208889 | 1.79111 |
| Ato_P15_P16_4_3_5-5_3_5 | 0.076267   | 0.0764078  | 0.213166 | 1.78683 |
| Ato_P8_P11_1_2_2-2_4_2  | 0.0764409  | 0.0764557  | 0.540356 | 1.45964 |
| Ato_P8_P11_1_2_2-2_2_4  | 0.076468   | 0.0764382  | 0.539743 | 1.46026 |
| Ato_P16_P16_4_4_5-5_5_3 | 0.0764461  | 0.0764726  | 0.267776 | 1.73222 |
| Ato_P14_P15_3_3_5-5_3_4 | 0.0764875  | 0.0764925  | 0.253773 | 1.74623 |
| Ato_P16_P16_4_5_4-5_3_5 | 0.0765422  | 0.0764514  | 0.268106 | 1.73189 |
| Ato_P9_P12_1_4_1-3_2_4  | 0.0764447  | 0.0765499  | 0.366542 | 1.63346 |
| Ato_P12_P15_1_4_4-2_5_5 | 0.076491   | 0.0765684  | 0.251113 | 1.74889 |
| Ato_P11_P13_1_3_4-2_5_3 | 0.0765674  | 0.0765931  | 0.219345 | 1.78065 |
| Ato_P9_P12_1_1_4-3_4_2  | 0.076577   | 0.0765965  | 0.366644 | 1.63336 |
| Ato_P12_P12_3_4_2-3_4_2 | 0.0766485  | 0.0766376  | 0.280924 | 1.71908 |
| Ato_P11_P13_1_4_3-2_3_5 | 0.0766528  | 0.076608   | 0.218769 | 1.78123 |
| Ato_P15_P16_4_5_3-5_5_3 | 0.0766679  | 0.0765851  | 0.213418 | 1.78658 |
| Ato_P11_P11_2_3_3-3_2_3 | 0.0767171  | 0.0767615  | 0.413611 | 1.58639 |
| Ato_P11_P11_2_3_3-3_3_2 | 0.0767357  | 0.0767653  | 0.414433 | 1.58557 |



| name                    | $\Delta_l$ | $\Delta_a$ | $c_l$    | $c_a$   |
|-------------------------|------------|------------|----------|---------|
| Ato_P10_P11_1_3_3-1_4_3 | 0.0764958  | 0.0768277  | 0.251189 | 1.74881 |
| Ato_P15_P17_4_3_5-5_5_4 | 0.0766524  | 0.0768946  | 0.250893 | 1.74911 |
| Ato_P15_P17_4_5_3-5_4_5 | 0.0767627  | 0.0769061  | 0.250547 | 1.74945 |
| Ato_P12_P14_2_3_4-3_3_5 | 0.0769876  | 0.0771061  | 0.553203 | 1.4468  |
| Ato_P9_P17_2_1_3-4_5_5  | 0.077114   | 0.0771292  | 0.481968 | 1.51803 |
| Ato_P9_P17_2_3_1-4_5_5  | 0.0769951  | 0.0771372  | 0.48241  | 1.51759 |
| Ato_P12_P14_2_4_3-3_5_3 | 0.0770365  | 0.0771435  | 0.55375  | 1.44625 |
| Ato_P12_P14_4_3_2-2_5_4 | 0.0770708  | 0.0771602  | 0.251189 | 1.74881 |
| Ato_P12_P14_4_2_3-2_4_5 | 0.0772267  | 0.0771709  | 0.251025 | 1.74898 |
| Ato_P11_P16_3_4_1-3_5_5 | 0.0771364  | 0.0772518  | 0.222414 | 1.77759 |
| Ato_P12_P12_3_2_4-3_2_4 | 0.0772619  | 0.077243   | 0.275733 | 1.72427 |
| Ato_P11_P16_3_1_4-3_5_5 | 0.0772611  | 0.0772787  | 0.222709 | 1.77729 |
| Ato_P15_P15_3_4_5-5_3_4 | 0.0773686  | 0.077367   | 0.307866 | 1.69213 |
| Ato_P14_P16_3_3_5-5_4_4 | 0.0773106  | 0.0773748  | 0.309772 | 1.69023 |
| Ato_P14_P16_3_5_3-5_4_4 | 0.0773115  | 0.0773832  | 0.309915 | 1.69009 |
| Ato_P15_P15_3_5_4-5_4_3 | 0.0773867  | 0.0773744  | 0.306744 | 1.69326 |
| Ato_P10_P11_1_3_3-1_3_4 | 0.077378   | 0.0774229  | 0.263118 | 1.73688 |
| Ato_P7_P13_2_1_1-2_4_4  | 0.0775848  | 0.0775659  | 0.506104 | 1.4939  |
| Ato_P10_P14_2_2_3-4_3_4 | 0.0775632  | 0.077658   | 0.278029 | 1.72197 |
| Ato_P10_P14_2_3_2-4_4_3 | 0.0776735  | 0.0776886  | 0.292578 | 1.70742 |
| Ato_P12_P17_3_3_3-5_4_5 | 0.0775518  | 0.0777608  | 0.370514 | 1.62949 |
| Ato_P11_P12_2_3_3-3_2_4 | 0.0777921  | 0.0777513  | 0.282308 | 1.71769 |
| Ato_P12_P17_3_3_3-5_5_4 | 0.0777193  | 0.0778243  | 0.371289 | 1.62871 |
| Ato_P11_P12_2_3_3-3_4_2 | 0.0778077  | 0.0778355  | 0.282912 | 1.71709 |
| Ato_P12_P13_2_5_2-2_4_4 | 0.0778433  | 0.0778992  | 0.401947 | 1.59805 |
| Ato_P11_P12_3_3_2-2_2_5 | 0.0779867  | 0.0778918  | 0.331118 | 1.66888 |
| Ato_P6_P13_1_1_1-2_5_3  | 0.0779718  | 0.0779979  | 0.455237 | 1.54476 |
| Ato_P6_P13_1_1_1-2_3_5  | 0.0779738  | 0.0780153  | 0.455124 | 1.54488 |
| Ato_P11_P12_3_2_3-2_5_2 | 0.077787   | 0.0780219  | 0.332195 | 1.66781 |
| Ato_P10_P18_2_2_3-5_5_5 | 0.0779812  | 0.0780666  | 0.356941 | 1.64306 |
| Ato_P13_P16_3_5_2-5_3_5 | 0.0781047  | 0.0780103  | 0.271768 | 1.72823 |
| Ato_P7_P12_1_2_1-1_4_4  | 0.0781412  | 0.0781451  | 0.55898  | 1.44102 |
| Ato_P13_P16_3_2_5-5_5_3 | 0.0780894  | 0.0781739  | 0.272353 | 1.72765 |
| Ato_P10_P16_2_3_2-5_3_5 | 0.0781568  | 0.0781831  | 0.295159 | 1.70484 |
| Ato_P10_P16_2_2_3-5_5_3 | 0.0782194  | 0.0782192  | 0.295718 | 1.70428 |
| Ato_P7_P12_1_1_2-1_4_4  | 0.0781834  | 0.0782239  | 0.560804 | 1.4392  |
| Ato_P12_P13_2_2_5-2_4_4 | 0.0782253  | 0.0781942  | 0.402603 | 1.5974  |
| Ato_P12_P16_4_2_3-3_5_5 | 0.0782868  | 0.0783129  | 0.3326   | 1.6674  |
| Ato_P12_P16_4_3_2-3_5_5 | 0.0781869  | 0.0783493  | 0.33298  | 1.66702 |

| name                    | $\Delta_l$ | $\Delta_a$ | $c_l$    | $c_a$   |
|-------------------------|------------|------------|----------|---------|
| Ato_P7_P7_1_1_2-1_1_2   | 0.0783196  | 0.078352   | 0.531287 | 1.46871 |
| Ato_P9_P16_2_3_1-4_4_5  | 0.0783174  | 0.0784415  | 0.388144 | 1.61186 |
| Ato_P9_P16_2_1_3-4_5_4  | 0.078467   | 0.0784692  | 0.388172 | 1.61183 |
| Ato_P15_P15_3_4_5-5_4_3 | 0.0784161  | 0.0784733  | 0.282625 | 1.71738 |
| Ato_P15_P15_3_5_4-5_3_4 | 0.0784788  | 0.0784555  | 0.282348 | 1.71765 |
| Ato_P14_P15_4_5_2-4_3_5 | 0.078428   | 0.0784847  | 0.249194 | 1.75081 |
| Ato_P13_P14_3_5_2-4_3_4 | 0.0784271  | 0.0785015  | 0.246386 | 1.75361 |
| Ato_P10_P12_3_2_2-2_4_3 | 0.0784994  | 0.0785602  | 0.372952 | 1.62705 |
| Ato_P13_P14_2_4_4-4_5_2 | 0.0784884  | 0.0785747  | 0.289239 | 1.71076 |
| Ato_P13_P14_3_2_5-4_4_3 | 0.0785489  | 0.0785826  | 0.246738 | 1.75326 |
| Ato_P13_P14_2_4_4-4_2_5 | 0.0784315  | 0.0785932  | 0.289609 | 1.71039 |
| Ato_P10_P17_2_2_3-5_5_4 | 0.0785704  | 0.0785944  | 0.295531 | 1.70447 |
| Ato_P10_P16_2_4_1-4_4_5 | 0.0784145  | 0.078603   | 0.439313 | 1.56069 |
| Ato_P10_P12_3_2_2-2_3_4 | 0.0785212  | 0.0786123  | 0.373571 | 1.62643 |
| Ato_P10_P17_2_3_2-5_4_5 | 0.0785263  | 0.0786246  | 0.296038 | 1.70396 |
| Ato_P10_P16_2_1_4-4_5_4 | 0.0785928  | 0.0786291  | 0.439405 | 1.5606  |
| Ato_P16_P17_5_4_4-5_5_4 | 0.0786583  | 0.0786942  | 0.30422  | 1.69578 |
| Ato_P10_P14_2_2_3-4_4_3 | 0.0788548  | 0.0789171  | 0.318775 | 1.68122 |
| Ato_P13_P16_3_4_3-5_3_5 | 0.0786904  | 0.0789173  | 0.284022 | 1.71598 |
| Ato_P13_P16_3_3_4-5_5_3 | 0.0789223  | 0.0788457  | 0.284118 | 1.71588 |
| Ato_P10_P14_2_3_2-4_3_4 | 0.0788999  | 0.0789251  | 0.318843 | 1.68116 |
| Ato_P11_P11_3_2_3-3_2_3 | 0.0789507  | 0.0790652  | 0.331734 | 1.66827 |
| Ato_P11_P16_1_3_4-3_5_5 | 0.0789913  | 0.0790817  | 0.501217 | 1.49878 |
| Ato_P11_P16_1_4_3-3_5_5 | 0.0790938  | 0.0790937  | 0.501185 | 1.49882 |
| Ato_P9_P10_2_2_2-1_2_4  | 0.0791519  | 0.0790838  | 0.485483 | 1.51452 |
| Ato_P14_P15_4_4_3-5_4_3 | 0.0792494  | 0.0792103  | 0.281915 | 1.71808 |
| Ato_P13_P13_4_3_3-4_3_3 | 0.0792391  | 0.0792575  | 0.3703   | 1.6297  |
| Ato_P9_P10_2_2_2-1_4_2  | 0.0791239  | 0.0792746  | 0.486107 | 1.51389 |
| Ato_P13_P14_3_4_3-4_3_4 | 0.079343   | 0.0793606  | 0.328805 | 1.6712  |
| Ato_P13_P14_3_3_4-4_4_3 | 0.0792683  | 0.079385   | 0.328789 | 1.67121 |
| Ato_P13_P14_4_2_4-2_4_5 | 0.0793362  | 0.0793964  | 0.260986 | 1.73901 |
| Ato_P13_P14_4_4_2-2_5_4 | 0.0793874  | 0.0793995  | 0.261153 | 1.73885 |
| Ato_P11_P11_2_4_2-2_4_2 | 0.0794063  | 0.0793927  | 0.367228 | 1.63277 |
| Ato_P12_P18_2_2_5-5_5_5 | 0.0793999  | 0.0794598  | 0.267822 | 1.73218 |
| Ato_P16_P17_5_4_4-5_4_5 | 0.0794867  | 0.0794718  | 0.310635 | 1.68937 |
| Ato_P11_P14_1_4_3-2_4_5 | 0.0794924  | 0.0794806  | 0.350946 | 1.64905 |
| Ato_P12_P18_2_5_2-5_5_5 | 0.0792865  | 0.0795039  | 0.268409 | 1.73159 |
| Ato_P11_P14_1_3_4-2_5_4 | 0.0793719  | 0.0795086  | 0.351296 | 1.6487  |
| Ato_P14_P16_3_3_5-5_3_5 | 0.0795397  | 0.0796263  | 0.25403  | 1.74597 |

| name                    | $\Delta_l$ | $\Delta_a$ | $c_l$    | $c_a$   |
|-------------------------|------------|------------|----------|---------|
| Ato_P14_P16_3_5_3-5_5_3 | 0.079655   | 0.0796882  | 0.253927 | 1.74607 |
| Ato_P11_P11_3_3_2-3_3_2 | 0.0797083  | 0.0797139  | 0.349136 | 1.65086 |
| Ato_P13_P14_4_4_2-3_4_4 | 0.0795183  | 0.0797418  | 0.302402 | 1.6976  |
| Ato_P14_P15_4_3_4-4_4_4 | 0.079692   | 0.0797697  | 0.358499 | 1.6415  |
| Ato_P13_P14_4_2_4-3_4_4 | 0.0796989  | 0.0797883  | 0.302413 | 1.69759 |
| Ato_P14_P15_4_3_4-5_3_4 | 0.0796294  | 0.079837   | 0.283118 | 1.71688 |
| Ato_P12_P12_2_5_2-3_3_3 | 0.0799301  | 0.0799096  | 0.352113 | 1.64789 |
| Ato_P11_P12_2_3_3-2_2_5 | 0.0798897  | 0.0799929  | 0.518017 | 1.48198 |
| Ato_P12_P12_2_2_5-3_3_3 | 0.0799943  | 0.0799986  | 0.352242 | 1.64776 |
| Ato_P13_P14_3_3_4-4_5_2 | 0.0799752  | 0.079999   | 0.23571  | 1.76429 |
| Ato_P12_P18_3_2_4-5_5_5 | 0.0800008  | 0.0799528  | 0.279971 | 1.72003 |
| Ato_P11_P12_2_3_3-2_5_2 | 0.0800131  | 0.0799919  | 0.517684 | 1.48232 |
| Ato_P13_P14_3_4_3-4_2_5 | 0.0799292  | 0.0800145  | 0.235342 | 1.76466 |
| Ato_P7_P14_1_2_1-2_5_4  | 0.0800499  | 0.0799835  | 0.841307 | 1.15869 |
| Ato_P7_P14_1_1_2-2_4_5  | 0.0800705  | 0.0800356  | 0.841956 | 1.15804 |
| Ato_P12_P18_3_4_2-5_5_5 | 0.08008    | 0.0800122  | 0.279454 | 1.72055 |
| Ato_P9_P12_1_3_2-1_4_4  | 0.080095   | 0.0801486  | 0.428039 | 1.57196 |
| Ato_P7_P9_1_2_1-2_1_3   | 0.0801684  | 0.080177   | 0.471944 | 1.52806 |
| Ato_P7_P9_1_1_2-2_3_1   | 0.0801805  | 0.080146   | 0.472161 | 1.52784 |
| Ato_P9_P12_1_2_3-1_4_4  | 0.0800941  | 0.0801829  | 0.434751 | 1.56525 |
| Ato_P11_P13_3_3_2-3_3_4 | 0.0801405  | 0.0801949  | 0.301994 | 1.69801 |
| Ato_P11_P13_3_2_3-3_4_3 | 0.0801511  | 0.0802587  | 0.302102 | 1.6979  |
| Ato_P13_P15_4_4_2-3_5_4 | 0.0803145  | 0.0803343  | 0.259297 | 1.7407  |
| Ato_P11_P17_3_2_3-4_5_5 | 0.0803415  | 0.0803472  | 0.379939 | 1.62006 |
| Ato_P11_P17_3_3_2-4_5_5 | 0.0802656  | 0.0803499  | 0.380039 | 1.61996 |
| Ato_P13_P15_4_2_4-3_4_5 | 0.0803484  | 0.0803766  | 0.259251 | 1.74075 |
| Ato_P10_P13_2_4_1-2_4_4 | 0.0804066  | 0.080406   | 0.502592 | 1.49741 |
| Ato_P10_P13_2_1_4-2_4_4 | 0.0804296  | 0.0804293  | 0.499258 | 1.50074 |
| Ato_P8_P15_1_3_1-3_4_5  | 0.0804197  | 0.080433   | 0.448152 | 1.55185 |
| Ato_P8_P15_1_1_3-3_5_4  | 0.0804402  | 0.0804176  | 0.44735  | 1.55265 |
| Ato_P9_P14_1_1_4-3_5_3  | 0.0804935  | 0.0804791  | 0.435206 | 1.56479 |
| Ato_P9_P9_2_1_3-2_3_1   | 0.0804335  | 0.0804964  | 0.445957 | 1.55404 |
| Ato_P9_P14_1_4_1-3_3_5  | 0.080474   | 0.0805133  | 0.435321 | 1.56468 |
| Ato_P10_P11_2_3_2-3_3_2 | 0.0805311  | 0.0805464  | 0.378115 | 1.62189 |
| Ato_P9_P11_1_3_2-1_4_3  | 0.0807469  | 0.0807705  | 0.265744 | 1.73426 |
| Ato_P13_P16_4_4_2-4_4_5 | 0.0807578  | 0.0808036  | 0.297448 | 1.70255 |
| Ato_P9_P11_1_2_3-1_3_4  | 0.0807401  | 0.0808297  | 0.266876 | 1.73312 |
| Ato_P10_P13_2_1_4-3_4_3 | 0.0807728  | 0.0808318  | 0.267386 | 1.73261 |
| Ato_P13_P16_4_2_4-4_5_4 | 0.0807359  | 0.0808962  | 0.29776  | 1.70224 |

| name                    | $\Delta_l$ | $\Delta_a$ | $c_l$    | $c_a$   |
|-------------------------|------------|------------|----------|---------|
| Ato_P10_P13_2_4_1-3_3_4 | 0.0806936  | 0.080897   | 0.267018 | 1.73298 |
| Ato_P9_P14_3_2_1-2_4_5  | 0.0808695  | 0.0809022  | 0.420714 | 1.57929 |
| Ato_P9_P14_3_1_2-2_5_4  | 0.0808313  | 0.0809236  | 0.420286 | 1.57971 |
| Ato_P12_P15_2_5_2-3_5_4 | 0.0809777  | 0.0809787  | 0.602692 | 1.39731 |
| Ato_P12_P14_2_5_2-2_4_5 | 0.080986   | 0.0810667  | 0.343309 | 1.65669 |
| Ato_P10_P15_3_1_3-3_5_4 | 0.0810479  | 0.0810846  | 0.399717 | 1.60028 |
| Ato_P12_P14_2_2_5-2_5_4 | 0.0810341  | 0.0810981  | 0.343572 | 1.65643 |
| Ato_P10_P15_3_3_1-3_4_5 | 0.0810645  | 0.0811126  | 0.398988 | 1.60101 |
| Ato_P11_P12_1_3_4-2_3_4 | 0.0809924  | 0.0811282  | 0.447998 | 1.552   |
| Ato_P11_P12_1_4_3-2_4_3 | 0.0811333  | 0.0810862  | 0.447788 | 1.55221 |
| Ato_P10_P11_2_2_3-3_2_3 | 0.0810249  | 0.0811392  | 0.370903 | 1.6291  |
| Ato_P9_P10_2_2_2-2_2_3  | 0.0811131  | 0.0811447  | 0.574158 | 1.42584 |
| Ato_P9_P13_2_3_1-2_5_3  | 0.0811275  | 0.0811673  | 0.392217 | 1.60778 |
| Ato_P9_P15_2_1_3-4_5_3  | 0.081186   | 0.081226   | 0.333135 | 1.66687 |
| Ato_P9_P13_2_1_3-2_3_5  | 0.081102   | 0.0812293  | 0.385382 | 1.61462 |
| Ato_P9_P15_2_3_1-4_3_5  | 0.0809367  | 0.0812368  | 0.333477 | 1.66652 |
| Ato_P9_P10_2_2_2-2_3_2  | 0.0812178  | 0.0812582  | 0.574208 | 1.42579 |
| Ato_P10_P17_3_2_2-4_5_5 | 0.0812475  | 0.0813679  | 0.367817 | 1.63218 |
| Ato_P13_P15_3_5_2-4_5_3 | 0.0812127  | 0.0814015  | 0.30224  | 1.69776 |
| Ato_P10_P15_3_1_3-2_5_5 | 0.0813068  | 0.0814299  | 0.228034 | 1.77197 |
| Ato_P10_P15_3_3_1-2_5_5 | 0.0813504  | 0.0814689  | 0.228219 | 1.77178 |
| Ato_P8_P13_1_2_2-2_3_5  | 0.0814927  | 0.0814934  | 0.605343 | 1.39466 |
| Ato_P8_P13_1_2_2-2_5_3  | 0.0814612  | 0.0814951  | 0.605524 | 1.39448 |
| Ato_P13_P15_3_2_5-4_3_5 | 0.081305   | 0.0814966  | 0.302638 | 1.69736 |
| Ato_P12_P15_2_2_5-3_4_5 | 0.0815358  | 0.0815803  | 0.605518 | 1.39448 |
| Ato_P11_P11_2_2_4-2_2_4 | 0.0815872  | 0.0815788  | 0.360235 | 1.63977 |
| Ato_P10_P14_3_3_1-3_3_5 | 0.0816768  | 0.0816961  | 0.460623 | 1.53938 |
| Ato_P10_P14_3_1_3-3_5_3 | 0.081731   | 0.0817094  | 0.460226 | 1.53977 |
| Ato_P6_P13_1_1_1-3_4_3  | 0.0818114  | 0.0817438  | 0.405305 | 1.5947  |
| Ato_P6_P13_1_1_1-3_3_4  | 0.081817   | 0.0818175  | 0.40513  | 1.59487 |
| Ato_P9_P12_2_2_2-2_5_2  | 0.0817642  | 0.0818362  | 0.383137 | 1.61686 |
| Ato_P9_P12_2_2_2-2_2_5  | 0.0817634  | 0.0819622  | 0.382652 | 1.61735 |
| Ato_P9_P10_1_2_3-2_4_1  | 0.0820674  | 0.0820642  | 0.52018  | 1.47982 |
| Ato_P9_P10_1_3_2-2_1_4  | 0.081961   | 0.0820808  | 0.521318 | 1.47868 |
| Ato_P12_P15_3_3_3-4_3_5 | 0.0821373  | 0.0822787  | 0.343998 | 1.656   |
| Ato_P12_P15_3_3_3-4_5_3 | 0.0822278  | 0.0823132  | 0.344264 | 1.65574 |
| Ato_P10_P12_2_4_1-2_3_4 | 0.0824338  | 0.0824485  | 0.323551 | 1.67645 |
| Ato_P11_P11_1_3_4-3_4_1 | 0.0321828  | 0.0824573  | 0.933254 | 1.06675 |
| Ato_P10_P12_2_1_4-2_4_3 | 0.082406   | 0.0824597  | 0.323654 | 1.67635 |

| name                    | $\Delta_l$ | $\Delta_a$ | $c_l$    | $c_a$   |
|-------------------------|------------|------------|----------|---------|
| Ato_P11_P11_1_4_3-3_1_4 | 0.0321843  | 0.0824933  | 0.933254 | 1.06675 |
| Ato_P12_P14_3_2_4-4_5_2 | 0.0825294  | 0.0825181  | 0.316237 | 1.68376 |
| Ato_P12_P14_3_4_2-4_2_5 | 0.0825348  | 0.0824948  | 0.315159 | 1.68484 |
| Ato_P14_P16_5_4_2-3_5_5 | 0.0824924  | 0.0825647  | 0.246273 | 1.75373 |
| Ato_P14_P16_5_2_4-3_5_5 | 0.082537   | 0.0825875  | 0.24672  | 1.75328 |
| Ato_P12_P12_2_3_4-4_3_2 | 0.0825931  | 0.0825719  | 0.313462 | 1.68654 |
| Ato_P13_P15_3_5_2-2_5_5 | 0.0825974  | 0.0825839  | 0.304009 | 1.69599 |
| Ato_P12_P12_2_4_3-4_2_3 | 0.0824527  | 0.082602   | 0.313694 | 1.68631 |
| Ato_P13_P15_3_2_5-2_5_5 | 0.0825221  | 0.0826214  | 0.304121 | 1.69588 |
| Ato_P12_P17_3_2_4-5_5_4 | 0.0824868  | 0.0826224  | 0.269997 | 1.73    |
| Ato_P12_P17_3_4_2-5_4_5 | 0.0825758  | 0.0826332  | 0.270185 | 1.72982 |
| Ato_P10_P11_3_1_3-2_4_2 | 0.0826631  | 0.0827386  | 0.448087 | 1.55191 |
| Ato_P10_P11_3_3_1-2_2_4 | 0.0826555  | 0.0827467  | 0.44776  | 1.55224 |
| Ato_P10_P12_1_2_4-3_3_3 | 0.0828471  | 0.0829107  | 0.48329  | 1.51671 |
| Ato_P15_P16_5_2_5-3_5_5 | 0.0826966  | 0.0829155  | 0.186444 | 1.81356 |
| Ato_P12_P13_3_3_3-3_2_5 | 0.0829372  | 0.0828906  | 0.272364 | 1.72764 |
| Ato_P10_P12_1_4_2-3_3_3 | 0.082874   | 0.082944   | 0.484197 | 1.5158  |
| Ato_P15_P16_5_5_2-3_5_5 | 0.082767   | 0.0829463  | 0.186119 | 1.81388 |
| Ato_P12_P13_3_3_3-3_5_2 | 0.0828192  | 0.0829508  | 0.272618 | 1.72738 |
| Ato_P10_P17_2_2_3-5_4_5 | 0.0829906  | 0.082975   | 0.344611 | 1.65539 |
| Ato_P13_P14_2_4_4-5_3_3 | 0.0829991  | 0.0829461  | 0.296782 | 1.70322 |
| Ato_P11_P16_4_2_2-3_5_5 | 0.0830137  | 0.0829812  | 0.38773  | 1.61227 |
| Ato_P14_P15_3_5_3-5_3_4 | 0.0830019  | 0.0830407  | 0.269913 | 1.73009 |
| Ato_P8_P9_1_1_3-1_3_2   | 0.0829939  | 0.0830552  | 0.489023 | 1.51098 |
| Ato_P8_P9_1_3_1-1_2_3   | 0.0829494  | 0.083073   | 0.489251 | 1.51075 |
| Ato_P13_P14_3_5_2-4_4_3 | 0.0827891  | 0.083084   | 0.273073 | 1.72693 |
| Ato_P13_P14_3_2_5-4_3_4 | 0.0827687  | 0.0831178  | 0.273769 | 1.72623 |
| Ato_P14_P16_4_3_4-5_3_5 | 0.0831584  | 0.0831885  | 0.30903  | 1.69097 |
| Ato_P10_P17_2_3_2-5_5_4 | 0.0831888  | 0.0831857  | 0.342985 | 1.65702 |
| Ato_P12_P15_2_2_5-5_5_2 | 0.0832315  | 0.0604232  | 0.234423 | 1.76558 |
| Ato_P7_P16_2_1_1-3_5_5  | 0.0831781  | 0.0832622  | 0.4296   | 1.5704  |
| Ato_P9_P12_2_1_3-3_4_2  | 0.0832961  | 0.0833501  | 0.321203 | 1.6788  |
| Ato_P10_P16_3_3_1-3_5_5 | 0.0833664  | 0.0833449  | 0.347821 | 1.65218 |
| Ato_P9_P12_2_3_1-3_2_4  | 0.0833561  | 0.0833696  | 0.321014 | 1.67899 |
| Ato_P11_P16_3_3_2-4_4_5 | 0.0833352  | 0.0833839  | 0.343957 | 1.65604 |
| Ato_P11_P16_3_2_3-4_5_4 | 0.0833214  | 0.083411   | 0.344262 | 1.65574 |
| Ato_P10_P16_3_1_3-3_5_5 | 0.0833718  | 0.0834292  | 0.348589 | 1.65141 |
| Ato_P12_P15_2_5_2-5_2_5 | 0.0834623  | 0.0604422  | 0.234423 | 1.76558 |
| Ato_P8_P11_2_2_1-2_3_3  | 0.0834208  | 0.0834722  | 0.449799 | 1.5502  |

| name                    | $\Delta_l$ | $\Delta_a$ | $c_l$    | $c_a$   |
|-------------------------|------------|------------|----------|---------|
| Ato_P9_P10_2_2_2-3_2_2  | 0.083455   | 0.0835231  | 0.382336 | 1.61766 |
| Ato_P8_P11_2_1_2-2_3_3  | 0.083399   | 0.0835485  | 0.449982 | 1.55002 |
| Ato_P10_P13_2_2_3-4_3_3 | 0.083546   | 0.0837259  | 0.405513 | 1.59449 |
| Ato_P6_P10_1_1_1-1_4_2  | 0.0837557  | 0.0837093  | 0.866697 | 1.1333  |
| Ato_P6_P10_1_1_1-1_2_4  | 0.0837573  | 0.0837439  | 0.867149 | 1.13285 |
| Ato_P15_P17_5_2_5-4_5_5 | 0.0839935  | 0.0841334  | 0.233855 | 1.76614 |
| Ato_P15_P17_5_5_2-4_5_5 | 0.0839832  | 0.0841349  | 0.234071 | 1.76593 |
| Ato_P15_P16_5_2_5-4_5_4 | 0.0841583  | 0.0841063  | 0.265643 | 1.73436 |
| Ato_P15_P16_5_5_2-4_4_5 | 0.0840987  | 0.0842101  | 0.266173 | 1.73383 |
| Ato_P11_P15_3_1_4-2_5_5 | 0.0840937  | 0.0842688  | 0.26857  | 1.73143 |
| Ato_P10_P13_2_3_2-4_3_3 | 0.0842883  | 0.0842724  | 0.422302 | 1.5777  |
| Ato_P14_P15_5_4_2-3_4_5 | 0.0842597  | 0.0842893  | 0.265261 | 1.73474 |
| Ato_P11_P15_3_4_1-2_5_5 | 0.0842898  | 0.0842413  | 0.268507 | 1.73149 |
| Ato_P13_P15_4_3_3-4_4_4 | 0.0842705  | 0.0842917  | 0.314204 | 1.6858  |
| Ato_P14_P15_4_3_4-4_3_5 | 0.0842598  | 0.084331   | 0.314701 | 1.6853  |
| Ato_P14_P15_5_2_4-3_5_4 | 0.0841446  | 0.0843445  | 0.266074 | 1.73393 |
| Ato_P12_P14_4_1_4-2_5_4 | 0.0841837  | 0.0843924  | 0.219092 | 1.78091 |
| Ato_P12_P14_4_4_1-2_4_5 | 0.0843537  | 0.0844193  | 0.218826 | 1.78117 |
| Ato_P11_P13_3_2_3-2_3_5 | 0.0844851  | 0.0844592  | 0.337096 | 1.6629  |
| Ato_P11_P13_3_3_2-2_5_3 | 0.084177   | 0.0844895  | 0.337183 | 1.66282 |
| Ato_P10_P11_2_2_3-1_3_4 | 0.0845339  | 0.0845399  | 0.437951 | 1.56205 |
| Ato_P10_P11_2_3_2-1_4_3 | 0.0845455  | 0.0845791  | 0.438059 | 1.56194 |
| Ato_P13_P13_3_3_4-4_4_2 | 0.0844492  | 0.084616   | 0.294024 | 1.70598 |
| Ato_P13_P13_3_4_3-4_2_4 | 0.0846266  | 0.0846293  | 0.29449  | 1.70551 |
| Ato_P14_P15_4_5_2-4_4_4 | 0.0843883  | 0.0846319  | 0.270909 | 1.72909 |
| Ato_P14_P15_4_2_5-4_4_4 | 0.0845018  | 0.0846426  | 0.271118 | 1.72888 |
| Ato_P15_P16_4_3_5-5_5_3 | 0.0846086  | 0.0846832  | 0.246349 | 1.75365 |
| Ato_P15_P16_4_5_3-5_3_5 | 0.0847606  | 0.0847608  | 0.246323 | 1.75368 |
| Ato_P8_P11_2_1_2-2_4_2  | 0.084701   | 0.0847754  | 0.522169 | 1.47783 |
| Ato_P8_P11_2_2_1-2_2_4  | 0.0847501  | 0.0847754  | 0.52152  | 1.47848 |
| Ato_P12_P13_2_2_5-3_3_4 | 0.084739   | 0.084812   | 0.504167 | 1.49583 |
| Ato_P9_P13_2_2_2-3_3_4  | 0.0848021  | 0.0848172  | 0.459257 | 1.54074 |
| Ato_P9_P13_2_2_2-3_4_3  | 0.0848027  | 0.0848278  | 0.459551 | 1.54045 |
| Ato_P12_P13_2_5_2-3_4_3 | 0.0848303  | 0.084823   | 0.505058 | 1.49494 |
| Ato_P10_P11_1_3_3-2_2_4 | 0.0848107  | 0.084855   | 0.440014 | 1.55999 |
| Ato_P10_P11_1_3_3-2_4_2 | 0.0848399  | 0.08486    | 0.440117 | 1.55988 |
| Ato_P11_P11_1_3_4-1_4_3 | 0.0848653  | 0.084936   | 0.248006 | 1.75199 |
| Ato_P11_P16_2_2_4-5_4_4 | 0.0849768  | 0.0850433  | 0.339533 | 1.66047 |
| Ato_P11_P16_2_4_2-5_4_4 | 0.0850538  | 0.0850549  | 0.339443 | 1.66056 |

| name                    | $\Delta_l$ | $\Delta_a$ | $c_l$    | $c_a$   |
|-------------------------|------------|------------|----------|---------|
| Ato_P8_P12_2_1_2-2_5_2  | 0.0851109  | 0.0850928  | 0.456123 | 1.54388 |
| Ato_P8_P12_2_2_1-2_2_5  | 0.0848972  | 0.0851379  | 0.456243 | 1.54376 |
| Ato_P8_P14_2_2_1-3_3_5  | 0.0851118  | 0.0851707  | 0.520034 | 1.47997 |
| Ato_P16_P16_4_5_4-5_5_3 | 0.0850661  | 0.0851707  | 0.33637  | 1.66363 |
| Ato_P13_P15_2_5_3-5_4_3 | 0.0851687  | 0.0851818  | 0.255472 | 1.74453 |
| Ato_P13_P13_2_3_5-3_3_4 | 0.0851819  | 0.0848332  | 0.435841 | 1.56416 |
| Ato_P8_P14_2_1_2-3_5_3  | 0.084958   | 0.0851912  | 0.520943 | 1.47906 |
| Ato_P13_P15_2_3_5-5_3_4 | 0.0850817  | 0.0852058  | 0.255365 | 1.74464 |
| Ato_P16_P16_4_4_5-5_3_5 | 0.0851137  | 0.0852229  | 0.336446 | 1.66355 |
| Ato_P7_P12_1_1_2-2_3_4  | 0.0852613  | 0.0852571  | 0.933465 | 1.06654 |
| Ato_P7_P12_1_2_1-2_4_3  | 0.085256   | 0.0852697  | 0.93373  | 1.06627 |
| Ato_P7_P9_1_1_2-2_2_2   | 0.0852422  | 0.0852854  | 0.460483 | 1.53952 |
| Ato_P10_P14_2_2_3-4_5_2 | 0.0852864  | 0.0852859  | 0.319635 | 1.68037 |
| Ato_P11_P13_4_1_3-2_5_3 | 0.0852974  | 0.0853055  | 0.44192  | 1.55808 |
| Ato_P7_P9_1_2_1-2_2_2   | 0.0851399  | 0.0853058  | 0.460363 | 1.53964 |
| Ato_P11_P13_4_3_1-2_3_5 | 0.0852587  | 0.0853062  | 0.442774 | 1.55723 |
| Ato_P10_P14_2_3_2-4_2_5 | 0.0851497  | 0.085307   | 0.319987 | 1.68001 |
| Ato_P11_P17_2_2_4-5_4_5 | 0.0855002  | 0.0855171  | 0.333748 | 1.66625 |
| Ato_P11_P17_2_4_2-5_5_4 | 0.0854686  | 0.0855606  | 0.334191 | 1.66581 |
| Ato_P9_P10_2_1_3-1_3_3  | 0.0855282  | 0.0855799  | 0.461406 | 1.53859 |
| Ato_P9_P10_2_3_1-1_3_3  | 0.0855425  | 0.0856069  | 0.461515 | 1.53848 |
| Ato_P8_P12_1_2_2-1_4_4  | 0.085448   | 0.085636   | 0.30903  | 1.69097 |
| Ato_P10_P11_2_2_3-3_3_2 | 0.0855052  | 0.0856404  | 0.347155 | 1.65284 |
| Ato_P10_P11_2_3_2-3_2_3 | 0.0855846  | 0.0856704  | 0.347964 | 1.65204 |
| Ato_P12_P13_2_2_5-2_3_5 | 0.0854924  | 0.0857828  | 0.430533 | 1.56947 |
| Ato_P11_P14_4_2_2-2_5_4 | 0.0857727  | 0.0858144  | 0.346057 | 1.65394 |
| Ato_P11_P14_4_2_2-2_4_5 | 0.085708   | 0.0858796  | 0.34649  | 1.65351 |
| Ato_P12_P13_2_5_2-2_5_3 | 0.0857828  | 0.085983   | 0.431488 | 1.56851 |
| Ato_P10_P12_1_4_2-2_3_4 | 0.085986   | 0.0859585  | 0.371585 | 1.62841 |
| Ato_P10_P12_1_2_4-2_4_3 | 0.0859541  | 0.0859893  | 0.372209 | 1.62779 |
| Ato_P7_P11_2_1_1-1_3_4  | 0.0859823  | 0.0860108  | 0.337297 | 1.6627  |
| Ato_P9_P15_3_2_1-2_5_5  | 0.0859593  | 0.0860192  | 0.247134 | 1.75287 |
| Ato_P7_P11_2_1_1-1_4_3  | 0.0860342  | 0.0859721  | 0.337647 | 1.66235 |
| Ato_P13_P13_3_5_2-4_2_4 | 0.0860565  | 0.0860265  | 0.337973 | 1.66203 |
| Ato_P13_P13_3_2_5-4_4_2 | 0.0860619  | 0.0860613  | 0.338314 | 1.66169 |
| Ato_P9_P13_2_2_2-4_3_3  | 0.0859403  | 0.0860857  | 0.38053  | 1.61947 |
| Ato_P9_P15_3_1_2-2_5_5  | 0.0860487  | 0.0860955  | 0.246955 | 1.75305 |
| Ato_P10_P10_1_2_4-1_4_2 | 0.0860733  | 0.0861377  | 0.278632 | 1.72137 |
| Ato_P8_P14_1_1_3-2_5_4  | 0.0861438  | 0.0861207  | 0.593895 | 1.40611 |

| name                    | $\Delta_l$ | $\Delta_a$ | $c_l$    | $c_a$   |
|-------------------------|------------|------------|----------|---------|
| Ato_P8_P14_1_3_1-2_4_5  | 0.0861558  | 0.0861897  | 0.595359 | 1.40464 |
| Ato_P7_P10_1_2_1-2_1_4  | 0.0861454  | 0.0862044  | 0.56399  | 1.43601 |
| Ato_P13_P13_2_5_3-3_4_3 | 0.0808385  | 0.0862634  | 0.501187 | 1.49881 |
| Ato_P14_P15_4_4_3-4_3_5 | 0.0862758  | 0.0862738  | 0.279525 | 1.72048 |
| Ato_P7_P10_1_1_2-2_4_1  | 0.0863041  | 0.0861512  | 0.562987 | 1.43701 |
| Ato_P14_P15_4_3_4-4_5_3 | 0.08636    | 0.0863494  | 0.279912 | 1.72009 |
| Ato_P17_P17_5_4_5-5_5_4 | 0.0863899  | 0.0863895  | 0.372729 | 1.62727 |
| Ato_P9_P11_1_2_3-1_4_3  | 0.0862308  | 0.0864095  | 0.265061 | 1.73494 |
| Ato_P9_P11_1_3_2-1_3_4  | 0.0862378  | 0.0864381  | 0.265414 | 1.73459 |
| Ato_P12_P15_2_2_5-4_4_4 | 0.0865912  | 0.0866608  | 0.333716 | 1.66628 |
| Ato_P12_P15_2_5_2-4_4_4 | 0.0866928  | 0.0866936  | 0.333475 | 1.66652 |
| Ato_P11_P14_2_2_4-4_3_4 | 0.0864832  | 0.0867317  | 0.335232 | 1.66477 |
| Ato_P12_P15_4_3_2-3_4_5 | 0.0867183  | 0.0867321  | 0.341567 | 1.65843 |
| Ato_P11_P14_2_4_2-4_4_3 | 0.0867426  | 0.0866818  | 0.33517  | 1.66483 |
| Ato_P9_P15_2_2_2-4_4_4  | 0.0867657  | 0.0867621  | 0.40738  | 1.59262 |
| Ato_P12_P15_4_2_3-3_5_4 | 0.0865776  | 0.0867811  | 0.341983 | 1.65802 |
| Ato_P10_P14_2_1_4-2_4_5 | 0.0867394  | 0.0868181  | 0.423095 | 1.57691 |
| Ato_P10_P11_2_1_4-1_4_3 | 0.086776   | 0.0868419  | 0.461744 | 1.53826 |
| Ato_P10_P14_2_4_1-2_5_4 | 0.0868649  | 0.086838   | 0.414727 | 1.58527 |
| Ato_P10_P11_2_4_1-1_3_4 | 0.0867475  | 0.0868837  | 0.462066 | 1.53793 |
| Ato_P10_P12_3_3_1-2_3_4 | 0.0868985  | 0.0869767  | 0.256709 | 1.74329 |
| Ato_P10_P12_3_1_3-2_4_3 | 0.0870209  | 0.0869959  | 0.256576 | 1.74342 |
| Ato_P8_P12_1_2_2-3_4_2  | 0.0870777  | 0.0871584  | 0.469224 | 1.53078 |
| Ato_P8_P12_1_2_2-3_2_4  | 0.0871856  | 0.0871684  | 0.468926 | 1.53107 |
| Ato_P11_P15_2_4_2-5_3_4 | 0.0871784  | 0.0872256  | 0.281414 | 1.71859 |
| Ato_P15_P15_4_5_3-5_4_3 | 0.0872547  | 0.0872345  | 0.296423 | 1.70358 |
| Ato_P13_P15_4_3_3-3_5_4 | 0.0872422  | 0.0873102  | 0.330118 | 1.66988 |
| Ato_P13_P15_4_3_3-3_4_5 | 0.0870556  | 0.0873155  | 0.330009 | 1.66999 |
| Ato_P11_P15_2_2_4-5_4_3 | 0.0873451  | 0.0872425  | 0.281309 | 1.71869 |
| Ato_P12_P12_3_3_3-3_4_2 | 0.0873301  | 0.0873694  | 0.34115  | 1.65885 |
| Ato_P12_P12_3_2_4-3_3_3 | 0.0873739  | 0.0873523  | 0.341148 | 1.65885 |
| Ato_P14_P14_2_4_5-4_2_5 | 0.0873964  | 0.0873311  | 0.290462 | 1.70954 |
| Ato_P14_P14_2_5_4-4_5_2 | 0.0873603  | 0.0874427  | 0.290956 | 1.70904 |
| Ato_P11_P16_2_4_2-4_5_4 | 0.087439   | 0.0875504  | 0.420079 | 1.57992 |
| Ato_P15_P15_4_3_5-5_3_4 | 0.0875687  | 0.087501   | 0.30264  | 1.69736 |
| Ato_P11_P16_2_2_4-4_4_5 | 0.0874821  | 0.0875713  | 0.419981 | 1.58002 |
| Ato_P11_P15_3_4_1-3_5_4 | 0.0875357  | 0.0876455  | 0.211241 | 1.78876 |
| Ato_P11_P15_3_1_4-3_4_5 | 0.0876545  | 0.0876177  | 0.211019 | 1.78898 |
| Ato_P13_P17_4_3_3-4_5_5 | 0.0876193  | 0.0877195  | 0.320926 | 1.67907 |



| name                    | $\Delta_l$ | $\Delta_a$ | $c_l$     | $c_a$   |
|-------------------------|------------|------------|-----------|---------|
| Ato_P13_P14_2_5_3-3_5_3 | 0.0876554  | 0.0877345  | 0.68876   | 1.31124 |
| Ato_P12_P15_2_2_5-5_4_3 | 0.0878539  | 0.0878266  | 0.251103  | 1.7489  |
| Ato_P11_P14_2_2_4-3_3_5 | 0.0878131  | 0.0879002  | 0.724684  | 1.27532 |
| Ato_P11_P14_2_4_2-3_5_3 | 0.0878877  | 0.0879064  | 0.724574  | 1.27543 |
| Ato_P12_P15_2_5_2-5_3_4 | 0.0879518  | 0.087858   | 0.251189  | 1.74881 |
| Ato_P9_P11_1_2_3-3_2_3  | 0.087944   | 0.0880123  | 0.445498  | 1.5545  |
| Ato_P9_P11_1_3_2-3_3_2  | 0.0879162  | 0.088021   | 0.444645  | 1.55535 |
| Ato_P13_P17_3_5_2-5_5_4 | 0.0877868  | 0.0880216  | 0.282733  | 1.71727 |
| Ato_P13_P17_3_2_5-5_4_5 | 0.0879731  | 0.0880308  | 0.282648  | 1.71735 |
| Ato_P9_P10_1_2_3-2_2_3  | 0.0880471  | 0.0880511  | 0.429944  | 1.57006 |
| Ato_P9_P10_1_3_2-2_3_2  | 0.0880799  | 0.0880085  | 0.430996  | 1.569   |
| Ato_P11_P12_2_2_4-4_4_1 | 0.0879896  | 0.0881344  | 0.351349  | 1.64865 |
| Ato_P11_P12_3_4_1-2_3_4 | 0.0881287  | 0.0881429  | 0.256402  | 1.7436  |
| Ato_P8_P11_2_1_2-1_3_4  | 0.087963   | 0.0881601  | 0.476872  | 1.52313 |
| Ato_P11_P12_3_1_4-2_4_3 | 0.0880944  | 0.0881762  | 0.256671  | 1.74333 |
| Ato_P13_P14_2_3_5-3_3_5 | 0.0880778  | 0.0881766  | 0.691119  | 1.30888 |
| Ato_P8_P11_2_2_1-1_4_3  | 0.0879917  | 0.0881845  | 0.476981  | 1.52302 |
| Ato_P11_P12_2_4_2-4_1_4 | 0.0880904  | 0.0881874  | 0.351472  | 1.64853 |
| Ato_P12_P13_1_4_4-3_5_2 | 0.0881542  | 0.0882044  | 0.408081  | 1.59192 |
| Ato_P12_P14_3_3_3-5_3_3 | 0.0883331  | 0.0884037  | 0.313722  | 1.68628 |
| Ato_P10_P14_1_3_3-2_4_5 | 0.0885782  | 0.0885798  | 0.254735  | 1.74526 |
| Ato_P10_P14_1_3_3-2_5_4 | 0.0885757  | 0.0885998  | 0.254716  | 1.74528 |
| Ato_P10_P15_2_4_1-3_5_4 | 0.088729   | 0.0887973  | 0.433086  | 1.56691 |
| Ato_P10_P10_1_2_4-3_3_1 | 0.0888025  | 0.0336263  | 0.0954993 | 1.9045  |
| Ato_P13_P15_2_5_3-5_2_5 | 0.0888294  | 0.0406688  | 0.0954993 | 1.9045  |
| Ato_P10_P17_2_1_4-4_5_5 | 0.0887932  | 0.0888332  | 0.62992   | 1.37008 |
| Ato_P10_P17_2_4_1-4_5_5 | 0.0888692  | 0.088852   | 0.629869  | 1.37013 |
| Ato_P13_P15_3_2_5-5_5_2 | 0.088706   | 0.0888815  | 0.310772  | 1.68923 |
| Ato_P10_P15_2_1_4-3_4_5 | 0.0888845  | 0.0888791  | 0.433043  | 1.56696 |
| Ato_P13_P15_3_5_2-5_2_5 | 0.0887934  | 0.0888846  | 0.310514  | 1.68949 |
| Ato_P11_P15_3_2_3-4_5_3 | 0.0888005  | 0.0889368  | 0.338139  | 1.66186 |
| Ato_P11_P11_1_4_3-1_4_3 | 0.0889024  | 0.0889512  | 0.187391  | 1.81261 |
| Ato_P13_P16_3_5_2-5_4_4 | 0.0889295  | 0.0889533  | 0.257945  | 1.74206 |
| Ato_P13_P16_3_2_5-5_4_4 | 0.0889394  | 0.0889794  | 0.257978  | 1.74202 |
| Ato_P10_P10_1_4_2-3_1_3 | 0.0889849  | 0.0336282  | 0.0954993 | 1.9045  |
| Ato_P14_P18_4_3_4-5_5_5 | 0.0889635  | 0.0889917  | 0.328943  | 1.67106 |
| Ato_P11_P15_3_3_2-4_3_5 | 0.0889443  | 0.0890027  | 0.337686  | 1.66231 |
| Ato_P7_P14_2_1_1-2_4_5  | 0.0890065  | 0.0890268  | 0.378895  | 1.62111 |
| Ato_P7_P14_2_1_1-2_5_4  | 0.0889801  | 0.0890643  | 0.379091  | 1.62091 |

| name                    | $\Delta_l$ | $\Delta_a$ | $c_l$    | $c_a$   |
|-------------------------|------------|------------|----------|---------|
| Ato_P14_P18_4_4_3-5_5_5 | 0.0890715  | 0.0889927  | 0.328854 | 1.67115 |
| Ato_P11_P11_1_3_4-1_3_4 | 0.0889256  | 0.0891149  | 0.199922 | 1.80008 |
| Ato_P10_P14_1_3_3-3_3_5 | 0.0890667  | 0.0891392  | 0.327684 | 1.67232 |
| Ato_P10_P13_2_3_2-4_2_4 | 0.0891644  | 0.0891418  | 0.314407 | 1.68559 |
| Ato_P10_P14_1_3_3-3_5_3 | 0.0890932  | 0.0891876  | 0.328211 | 1.67179 |
| Ato_P10_P13_2_2_3-4_4_2 | 0.0890893  | 0.0891976  | 0.314409 | 1.68559 |
| Ato_P13_P13_3_3_4-4_3_3 | 0.0892853  | 0.089286   | 0.353929 | 1.64607 |
| Ato_P12_P15_3_3_3-5_4_3 | 0.0892538  | 0.0893806  | 0.332857 | 1.66714 |
| Ato_P13_P16_2_3_5-5_3_5 | 0.0894037  | 0.0894258  | 0.293898 | 1.7061  |
| Ato_P13_P16_2_5_3-5_5_3 | 0.0890603  | 0.0894619  | 0.293896 | 1.7061  |
| Ato_P12_P15_3_3_3-5_3_4 | 0.0895477  | 0.0896311  | 0.328126 | 1.67187 |
| Ato_P10_P15_2_3_2-5_4_3 | 0.0896136  | 0.0896692  | 0.294664 | 1.70534 |
| Ato_P8_P11_1_3_1-3_2_3  | 0.089655   | 0.0896951  | 0.421443 | 1.57856 |
| Ato_P8_P11_1_1_3-3_3_2  | 0.0896537  | 0.0897019  | 0.421141 | 1.57886 |
| Ato_P13_P13_3_4_3-4_3_3 | 0.0897772  | 0.0897226  | 0.34739  | 1.65261 |
| Ato_P10_P15_1_3_3-2_5_5 | 0.0897129  | 0.0897867  | 0.269927 | 1.73007 |
| Ato_P11_P12_3_2_3-3_2_4 | 0.0896397  | 0.0898442  | 0.437083 | 1.56292 |
| Ato_P12_P13_3_2_4-3_2_5 | 0.0897969  | 0.0898949  | 0.354419 | 1.64558 |
| Ato_P11_P12_3_3_2-3_4_2 | 0.0897715  | 0.0899088  | 0.436856 | 1.56314 |
| Ato_P12_P13_3_4_2-3_5_2 | 0.0899997  | 0.0899824  | 0.353921 | 1.64608 |
| Ato_P10_P10_2_1_4-2_3_2 | 0.0899701  | 0.0900186  | 0.334551 | 1.66545 |
| Ato_P11_P13_4_2_2-2_4_4 | 0.0900169  | 0.0900196  | 0.370427 | 1.62957 |
| Ato_P10_P10_2_2_3-2_4_1 | 0.0899657  | 0.0900243  | 0.334246 | 1.66575 |
| Ato_P11_P12_1_4_3-2_2_5 | 0.090082   | 0.0900611  | 0.31747  | 1.68253 |
| Ato_P15_P16_5_4_3-4_5_4 | 0.0900956  | 0.0900739  | 0.284708 | 1.71529 |
| Ato_P10_P16_2_3_2-5_4_4 | 0.0900683  | 0.0901509  | 0.399056 | 1.60094 |
| Ato_P11_P12_1_3_4-2_5_2 | 0.0901654  | 0.0900674  | 0.318071 | 1.68193 |
| Ato_P8_P8_1_2_2-2_1_2   | 0.0902487  | 0.0902332  | 0.429138 | 1.57086 |
| Ato_P8_P8_1_2_2-2_2_1   | 0.0901989  | 0.0902607  | 0.430012 | 1.56999 |
| Ato_P10_P16_2_2_3-5_4_4 | 0.0902829  | 0.0903179  | 0.40107  | 1.59893 |
| Ato_P11_P14_3_4_1-3_4_4 | 0.0901918  | 0.0903554  | 0.232748 | 1.76725 |
| Ato_P11_P14_3_1_4-3_4_4 | 0.0903686  | 0.0903613  | 0.232875 | 1.76712 |
| Ato_P15_P16_5_3_4-4_4_5 | 0.0904117  | 0.0904111  | 0.287076 | 1.71292 |
| Ato_P11_P11_2_2_4-3_2_3 | 0.0904455  | 0.0888802  | 0.330384 | 1.66962 |
| Ato_P10_P13_1_3_3-2_5_3 | 0.0904424  | 0.0904661  | 0.254153 | 1.74585 |
| Ato_P10_P13_1_3_3-2_3_5 | 0.0904384  | 0.0904675  | 0.25427  | 1.74573 |
| Ato_P11_P13_3_3_2-3_2_5 | 0.0903199  | 0.0904754  | 0.36538  | 1.63462 |
| Ato_P7_P11_1_2_1-3_2_3  | 0.0904209  | 0.0904798  | 0.433029 | 1.56697 |
| Ato_P7_P11_1_1_2-3_3_2  | 0.0903773  | 0.0904926  | 0.432818 | 1.56718 |

| name                    | $\Delta_l$ | $\Delta_a$ | $c_l$     | $c_a$   |
|-------------------------|------------|------------|-----------|---------|
| Ato_P11_P13_3_2_3-3_5_2 | 0.0904574  | 0.0904964  | 0.363986  | 1.63601 |
| Ato_P9_P10_1_3_2-1_2_4  | 0.0905866  | 0.0905723  | 0.345758  | 1.65424 |
| Ato_P9_P10_1_2_3-1_4_2  | 0.0905838  | 0.0905894  | 0.344903  | 1.6551  |
| Ato_P12_P14_3_2_4-4_4_3 | 0.0906165  | 0.0906381  | 0.267927  | 1.73207 |
| Ato_P11_P15_2_2_4-5_5_2 | 0.0906669  | 0.0680022  | 0.234423  | 1.76558 |
| Ato_P12_P14_3_4_2-4_3_4 | 0.0907172  | 0.0906954  | 0.268225  | 1.73178 |
| Ato_P11_P15_2_4_2-5_2_5 | 0.0907942  | 0.0680638  | 0.234423  | 1.76558 |
| Ato_P10_P15_2_2_3-5_3_4 | 0.0907578  | 0.0908063  | 0.286117  | 1.71388 |
| Ato_P13_P15_2_3_5-5_5_2 | 0.0908483  | 0.0402686  | 0.0891251 | 1.91087 |
| Ato_P14_P17_4_5_2-5_4_5 | 0.0905494  | 0.0908548  | 0.228655  | 1.77135 |
| Ato_P14_P17_4_2_5-5_5_4 | 0.0908289  | 0.0908664  | 0.228642  | 1.77136 |
| Ato_P10_P12_2_3_2-2_5_2 | 0.0909005  | 0.0909053  | 0.454692  | 1.54531 |
| Ato_P14_P14_3_3_5-5_4_2 | 0.0908643  | 0.0909776  | 0.316725  | 1.68327 |
| Ato_P8_P13_2_2_1-2_5_3  | 0.0909913  | 0.0910522  | 0.46191   | 1.53809 |
| Ato_P12_P12_2_3_4-3_2_4 | 0.0910066  | 0.0910956  | 0.43542   | 1.56458 |
| Ato_P8_P13_2_1_2-2_3_5  | 0.0910279  | 0.0910977  | 0.461588  | 1.53841 |
| Ato_P11_P13_2_3_3-3_5_2 | 0.0910446  | 0.0910993  | 0.308288  | 1.69171 |
| Ato_P12_P12_2_4_3-3_4_2 | 0.0909956  | 0.0911253  | 0.436516  | 1.56348 |
| Ato_P11_P13_2_3_3-3_2_5 | 0.0910679  | 0.0911496  | 0.308744  | 1.69126 |
| Ato_P11_P11_2_4_2-3_3_2 | 0.09113    | 0.0911867  | 0.324478  | 1.67552 |
| Ato_P13_P15_2_5_3-4_5_3 | 0.0912026  | 0.091292   | 0.371353  | 1.62865 |
| Ato_P9_P14_2_3_1-4_2_5  | 0.0911553  | 0.0913224  | 0.321891  | 1.67811 |
| Ato_P9_P14_2_1_3-4_5_2  | 0.0911859  | 0.0913333  | 0.321973  | 1.67803 |
| Ato_P13_P15_2_3_5-4_3_5 | 0.0910903  | 0.0913457  | 0.371581  | 1.62842 |
| Ato_P12_P16_3_2_4-5_5_3 | 0.0914301  | 0.0914687  | 0.265829  | 1.73417 |
| Ato_P11_P13_3_4_1-3_3_4 | 0.0914276  | 0.091524   | 0.24447   | 1.75553 |
| Ato_P12_P16_3_4_2-5_3_5 | 0.0914489  | 0.0915323  | 0.265542  | 1.73446 |
| Ato_P11_P13_3_1_4-3_4_3 | 0.0914665  | 0.0915362  | 0.244073  | 1.75593 |
| Ato_P10_P16_2_2_3-5_3_5 | 0.0915346  | 0.0915837  | 0.249911  | 1.75009 |
| Ato_P11_P13_2_4_2-4_3_3 | 0.091597   | 0.0916301  | 0.33838   | 1.66162 |
| Ato_P10_P13_3_2_2-2_3_5 | 0.0916662  | 0.0916548  | 0.281444  | 1.71856 |
| Ato_P11_P13_2_2_4-4_3_3 | 0.0915212  | 0.0916671  | 0.338475  | 1.66153 |
| Ato_P10_P13_3_2_2-2_5_3 | 0.0916676  | 0.0916693  | 0.281813  | 1.71819 |
| Ato_P9_P13_3_2_1-2_3_5  | 0.0917417  | 0.0917678  | 0.485362  | 1.51464 |
| Ato_P9_P13_3_1_2-2_5_3  | 0.0916803  | 0.09177    | 0.485229  | 1.51477 |
| Ato_P14_P15_3_4_4-5_4_3 | 0.0919386  | 0.0919223  | 0.313535  | 1.68647 |
| Ato_P14_P15_3_4_4-5_3_4 | 0.0919566  | 0.0919229  | 0.314549  | 1.68545 |
| Ato_P6_P14_1_1_1-3_5_3  | 0.0919892  | 0.0920495  | 0.538173  | 1.46183 |
| Ato_P6_P14_1_1_1-3_3_5  | 0.0920612  | 0.0920782  | 0.539073  | 1.46093 |

| name                    | $\Delta_l$ | $\Delta_a$ | $c_l$    | $c_a$   |
|-------------------------|------------|------------|----------|---------|
| Ato_P10_P13_1_3_3-3_2_5 | 0.0920524  | 0.0920937  | 0.449177 | 1.55082 |
| Ato_P10_P13_1_3_3-3_5_2 | 0.0921087  | 0.0921028  | 0.449065 | 1.55094 |
| Ato_P8_P12_1_3_1-2_3_4  | 0.0921513  | 0.0921074  | 0.425996 | 1.574   |
| Ato_P10_P16_2_3_2-5_5_3 | 0.0921486  | 0.0921684  | 0.247789 | 1.75221 |
| Ato_P8_P12_1_1_3-2_4_3  | 0.0921727  | 0.0921499  | 0.429973 | 1.57003 |
| Ato_P9_P12_2_3_1-1_4_4  | 0.092185   | 0.0922139  | 0.422326 | 1.57767 |
| Ato_P8_P12_2_2_1-2_4_3  | 0.0922093  | 0.0922163  | 0.460213 | 1.53979 |
| Ato_P9_P12_2_1_3-1_4_4  | 0.0921486  | 0.0922405  | 0.422422 | 1.57758 |
| Ato_P8_P12_2_1_2-2_3_4  | 0.0922477  | 0.0922696  | 0.46025  | 1.53975 |
| Ato_P10_P13_3_1_3-2_4_4 | 0.0922114  | 0.0923098  | 0.197403 | 1.8026  |
| Ato_P10_P13_3_3_1-2_4_4 | 0.0922195  | 0.0923547  | 0.197586 | 1.80241 |
| Ato_P15_P15_5_4_3-5_4_3 | 0.0922204  | 0.0923784  | 0.304057 | 1.69594 |
| Ato_P13_P13_3_2_5-3_2_5 | 0.0923945  | 0.0924702  | 0.260721 | 1.73928 |
| Ato_P11_P15_3_4_1-4_3_5 | 0.0924683  | 0.0924916  | 0.241891 | 1.75811 |
| Ato_P11_P15_3_1_4-4_5_3 | 0.0924723  | 0.0925149  | 0.241597 | 1.7584  |
| Ato_P6_P17_1_1_1-4_5_5  | 0.0925686  | 0.0471513  | 0.154882 | 1.84512 |
| Ato_P6_P12_1_1_1-3_3_3  | 0.0925571  | 0.0926653  | 0.55327  | 1.44673 |
| Ato_P15_P15_5_3_4-5_3_4 | 0.0926475  | 0.0927852  | 0.307377 | 1.69262 |
| Ato_P9_P12_2_1_3-3_3_3  | 0.0928576  | 0.0929159  | 0.416053 | 1.58395 |
| Ato_P9_P12_2_3_1-3_3_3  | 0.09287    | 0.0929347  | 0.415995 | 1.58401 |
| Ato_P8_P10_2_1_2-2_3_2  | 0.0929655  | 0.0930041  | 0.531994 | 1.46801 |
| Ato_P8_P10_2_2_1-2_2_3  | 0.092856   | 0.0930044  | 0.532011 | 1.46799 |
| Ato_P8_P10_1_1_3-3_3_1  | 0.0929253  | 0.0930048  | 0.489524 | 1.51048 |
| Ato_P13_P16_4_4_2-4_5_4 | 0.0929236  | 0.093016   | 0.234259 | 1.76574 |
| Ato_P8_P10_1_3_1-3_1_3  | 0.092994   | 0.0930285  | 0.489271 | 1.51073 |
| Ato_P13_P16_4_2_4-4_4_5 | 0.0929591  | 0.0930351  | 0.234403 | 1.7656  |
| Ato_P11_P14_3_3_2-3_5_3 | 0.0930503  | 0.0930241  | 0.384461 | 1.61554 |
| Ato_P11_P14_3_2_3-3_3_5 | 0.0930314  | 0.0930792  | 0.383794 | 1.61621 |
| Ato_P14_P16_4_4_3-5_4_4 | 0.0930877  | 0.0930692  | 0.334245 | 1.66575 |
| Ato_P13_P15_3_4_3-5_2_5 | 0.0930658  | 0.093093   | 0.275735 | 1.72427 |
| Ato_P13_P15_3_3_4-5_5_2 | 0.092966   | 0.0931061  | 0.275971 | 1.72403 |
| Ato_P10_P14_1_2_4-3_4_4 | 0.0930807  | 0.0931301  | 0.484524 | 1.51548 |
| Ato_P8_P10_1_1_3-1_3_3  | 0.0931184  | 0.0931514  | 0.602497 | 1.3975  |
| Ato_P10_P14_1_4_2-3_4_4 | 0.0931711  | 0.0931715  | 0.484726 | 1.51527 |
| Ato_P8_P10_1_3_1-1_3_3  | 0.0931165  | 0.0931799  | 0.605819 | 1.39418 |
| Ato_P12_P16_2_2_5-5_4_4 | 0.092984   | 0.0932171  | 0.240336 | 1.75966 |
| Ato_P12_P16_2_5_2-5_4_4 | 0.0930635  | 0.0932472  | 0.240612 | 1.75939 |
| Ato_P7_P12_1_2_1-3_3_3  | 0.0933005  | 0.093334   | 0.354089 | 1.64591 |
| Ato_P7_P12_1_1_2-3_3_3  | 0.0932776  | 0.0934001  | 0.354813 | 1.64519 |

| name                    | $\Delta_l$ | $\Delta_a$ | $c_l$    | $c_a$   |
|-------------------------|------------|------------|----------|---------|
| Ato_P12_P14_4_4_1-3_3_5 | 0.0934113  | 0.0934772  | 0.297032 | 1.70297 |
| Ato_P12_P14_4_1_4-3_5_3 | 0.0935172  | 0.0935169  | 0.297262 | 1.70274 |
| Ato_P12_P14_4_3_2-3_3_5 | 0.0935185  | 0.0935578  | 0.357967 | 1.64203 |
| Ato_P10_P12_2_2_3-2_2_5 | 0.0934586  | 0.0935933  | 0.462569 | 1.53743 |
| Ato_P12_P14_3_2_4-2_4_5 | 0.0933685  | 0.093612   | 0.380391 | 1.61961 |
| Ato_P12_P14_4_2_3-3_5_3 | 0.0936182  | 0.0936307  | 0.357301 | 1.6427  |
| Ato_P12_P14_3_4_2-2_5_4 | 0.0934715  | 0.0936687  | 0.380189 | 1.61981 |
| Ato_P12_P17_2_2_5-4_5_5 | 0.0935438  | 0.0936839  | 0.584773 | 1.41523 |
| Ato_P12_P17_2_5_2-4_5_5 | 0.0936497  | 0.0936935  | 0.584929 | 1.41507 |
| Ato_P9_P13_1_3_2-3_4_3  | 0.0936844  | 0.093762   | 0.498326 | 1.50167 |
| Ato_P13_P13_3_5_2-3_5_2 | 0.0936898  | 0.0938026  | 0.259969 | 1.74003 |
| Ato_P9_P13_1_2_3-3_3_4  | 0.0937655  | 0.0938068  | 0.498627 | 1.50137 |
| Ato_P11_P13_2_3_3-4_4_2 | 0.0937787  | 0.0938683  | 0.332269 | 1.66773 |
| Ato_P11_P13_2_3_3-4_2_4 | 0.0936943  | 0.093872   | 0.332339 | 1.66766 |
| Ato_P14_P14_2_4_5-3_3_5 | 0.0938737  | 0.0938639  | 0.434599 | 1.5654  |
| Ato_P14_P14_2_5_4-3_5_3 | 0.0938745  | 0.0938237  | 0.434705 | 1.5653  |
| Ato_P11_P14_4_3_1-2_4_5 | 0.0935998  | 0.0938872  | 0.303583 | 1.69642 |
| Ato_P11_P14_4_1_3-2_5_4 | 0.0937765  | 0.0939263  | 0.303507 | 1.69649 |
| Ato_P15_P18_5_2_5-5_5_5 | 0.0939534  | 0.0939584  | 0.233287 | 1.76671 |
| Ato_P15_P18_5_5_2-5_5_5 | 0.0939522  | 0.0939912  | 0.233408 | 1.76659 |
| Ato_P9_P13_2_2_2-3_5_2  | 0.0667139  | 0.094009   | 0.57544  | 1.42456 |
| Ato_P9_P13_2_2_2-3_2_5  | 0.0695272  | 0.094042   | 0.537032 | 1.46297 |
| Ato_P11_P12_2_4_2-1_4_4 | 0.094116   | 0.094072   | 0.354813 | 1.64519 |
| Ato_P11_P12_3_4_1-3_2_4 | 0.0941545  | 0.0941672  | 0.344158 | 1.65584 |
| Ato_P11_P12_2_2_4-1_4_4 | 0.0941028  | 0.0941733  | 0.356    | 1.644   |
| Ato_P11_P12_3_1_4-3_4_2 | 0.0941939  | 0.0941937  | 0.344129 | 1.65587 |
| Ato_P9_P13_1_1_4-2_5_3  | 0.0941617  | 0.0941959  | 0.462503 | 1.5375  |
| Ato_P10_P14_3_2_2-3_4_4 | 0.0942097  | 0.094249   | 0.336311 | 1.66369 |
| Ato_P9_P13_1_4_1-2_3_5  | 0.0941406  | 0.0942777  | 0.462734 | 1.53727 |
| Ato_P13_P16_5_2_3-3_5_5 | 0.0943726  | 0.0943342  | 0.34298  | 1.65702 |
| Ato_P13_P16_5_3_2-3_5_5 | 0.0942117  | 0.0944701  | 0.343278 | 1.65672 |
| Ato_P11_P11_1_4_3-3_3_2 | 0.0946017  | 0.0551501  | 0.251189 | 1.74881 |
| Ato_P14_P17_4_2_5-5_4_5 | 0.0942523  | 0.0946142  | 0.214352 | 1.78565 |
| Ato_P10_P14_3_1_3-3_4_4 | 0.0946252  | 0.0946422  | 0.373588 | 1.62641 |
| Ato_P13_P15_4_4_2-4_3_5 | 0.0946424  | 0.0945766  | 0.3001   | 1.6999  |
| Ato_P13_P15_4_2_4-4_5_3 | 0.0946624  | 0.0946027  | 0.29966  | 1.70034 |
| Ato_P10_P14_3_3_1-3_4_4 | 0.0946224  | 0.0947176  | 0.373605 | 1.6264  |
| Ato_P8_P17_2_2_1-4_5_5  | 0.0946697  | 0.0948599  | 0.365618 | 1.63438 |
| Ato_P9_P10_1_2_3-1_2_4  | 0.0948468  | 0.0949088  | 0.562167 | 1.43783 |

| name                    | $\Delta_l$ | $\Delta_a$ | $c_l$    | $c_a$   |
|-------------------------|------------|------------|----------|---------|
| Ato_P8_P17_2_1_2-4_5_5  | 0.0948489  | 0.0949436  | 0.365161 | 1.63484 |
| Ato_P9_P15_1_3_2-3_5_4  | 0.094944   | 0.0949176  | 0.49876  | 1.50124 |
| Ato_P8_P15_2_2_1-3_5_4  | 0.0948999  | 0.0949488  | 0.403382 | 1.59662 |
| Ato_P9_P15_1_2_3-3_4_5  | 0.0949337  | 0.0949826  | 0.49886  | 1.50114 |
| Ato_P8_P15_2_1_2-3_4_5  | 0.0949954  | 0.0949724  | 0.402752 | 1.59725 |
| Ato_P8_P13_1_1_3-2_4_4  | 0.0950434  | 0.0950267  | 0.856652 | 1.14335 |
| Ato_P8_P13_1_3_1-2_4_4  | 0.0952257  | 0.0952778  | 0.859763 | 1.14024 |
| Ato_P8_P15_1_1_3-2_5_5  | 0.0952345  | 0.0953173  | 0.814562 | 1.18544 |
| Ato_P11_P13_3_2_3-3_3_4 | 0.095358   | 0.0953716  | 0.360329 | 1.63967 |
| Ato_P16_P18_5_3_5-5_5_5 | 0.0953128  | 0.0954146  | 0.268919 | 1.73108 |
| Ato_P16_P18_5_5_3-5_5_5 | 0.0954362  | 0.0954133  | 0.26867  | 1.73133 |
| Ato_P8_P15_1_3_1-2_5_5  | 0.0953882  | 0.095461   | 0.81805  | 1.18195 |
| Ato_P11_P13_3_3_2-3_4_3 | 0.0952723  | 0.09551    | 0.360241 | 1.63976 |
| Ato_P12_P13_2_4_3-4_4_2 | 0.0954008  | 0.0955312  | 0.305186 | 1.69481 |
| Ato_P12_P13_2_3_4-4_2_4 | 0.0953306  | 0.095571   | 0.30487  | 1.69513 |
| Ato_P9_P13_2_3_1-3_4_3  | 0.0956549  | 0.0956663  | 0.449319 | 1.55068 |
| Ato_P9_P13_2_1_3-3_3_4  | 0.0957171  | 0.0956883  | 0.449046 | 1.55095 |
| Ato_P7_P15_1_2_1-3_5_4  | 0.0958219  | 0.0958242  | 0.451407 | 1.54859 |
| Ato_P7_P15_1_1_2-3_4_5  | 0.095856   | 0.0958287  | 0.451832 | 1.54817 |
| Ato_P11_P12_3_2_3-3_4_2 | 0.0958754  | 0.0959798  | 0.319428 | 1.68057 |
| Ato_P11_P12_3_3_2-3_2_4 | 0.0959806  | 0.0959135  | 0.319718 | 1.68028 |
| Ato_P15_P16_5_5_2-4_5_4 | 0.0960069  | 0.0960057  | 0.246074 | 1.75393 |
| Ato_P15_P16_5_2_5-4_4_5 | 0.0957001  | 0.0960559  | 0.246516 | 1.75348 |
| Ato_P13_P14_4_2_4-3_3_5 | 0.0958902  | 0.096057   | 0.30418  | 1.69582 |
| Ato_P13_P14_4_4_2-3_5_3 | 0.0960555  | 0.0960852  | 0.30429  | 1.69571 |
| Ato_P11_P12_2_2_4-4_3_2 | 0.0960758  | 0.0961773  | 0.357517 | 1.64248 |
| Ato_P11_P12_2_4_2-4_2_3 | 0.0962024  | 0.0962017  | 0.35671  | 1.64329 |
| Ato_P16_P17_5_3_5-5_4_5 | 0.0960993  | 0.0962461  | 0.292423 | 1.70758 |
| Ato_P10_P12_2_2_3-4_2_3 | 0.096414   | 0.0964249  | 0.370442 | 1.62956 |
| Ato_P16_P17_5_5_3-5_5_4 | 0.0964616  | 0.0964347  | 0.293855 | 1.70614 |
| Ato_P9_P10_1_3_2-1_4_2  | 0.0964269  | 0.0965152  | 0.583686 | 1.41631 |
| Ato_P12_P15_4_1_4-2_5_5 | 0.0964669  | 0.0965628  | 0.245493 | 1.75451 |
| Ato_P10_P14_2_4_1-4_3_4 | 0.0964494  | 0.0965775  | 0.319206 | 1.68079 |
| Ato_P10_P14_2_1_4-4_4_3 | 0.0965464  | 0.096609   | 0.318873 | 1.68113 |
| Ato_P12_P15_4_4_1-2_5_5 | 0.0964214  | 0.0966291  | 0.24557  | 1.75443 |
| Ato_P10_P14_3_2_2-3_3_5 | 0.0965277  | 0.0966296  | 0.34118  | 1.65882 |
| Ato_P10_P14_3_2_2-3_5_3 | 0.09664    | 0.0966407  | 0.341021 | 1.65898 |
| Ato_P13_P16_4_3_3-5_4_4 | 0.0967176  | 0.0967275  | 0.306888 | 1.69311 |
| Ato_P10_P16_3_2_2-4_4_5 | 0.0966012  | 0.0967681  | 0.337199 | 1.6628  |

| name                    | $\Delta_l$ | $\Delta_a$ | $c_l$    | $c_a$   |
|-------------------------|------------|------------|----------|---------|
| Ato_P10_P16_3_2_2-4_5_4 | 0.096632   | 0.096774   | 0.337927 | 1.66207 |
| Ato_P6_P9_1_1_1-2_2_2   | 0.09678    | 0.0967661  | 0.458914 | 1.54109 |
| Ato_P15_P15_4_5_3-5_2_5 | 0.0968214  | 0.0967838  | 0.271853 | 1.72815 |
| Ato_P8_P12_1_1_3-1_4_4  | 0.0967943  | 0.096856   | 0.627141 | 1.37286 |
| Ato_P11_P15_2_2_4-5_3_4 | 0.0968086  | 0.0968611  | 0.348893 | 1.65111 |
| Ato_P12_P14_2_4_3-5_3_3 | 0.0969482  | 0.0969674  | 0.267224 | 1.73278 |
| Ato_P15_P15_4_3_5-5_5_2 | 0.0969844  | 0.0968761  | 0.27164  | 1.72836 |
| Ato_P11_P15_2_4_2-5_4_3 | 0.0969683  | 0.0970126  | 0.350285 | 1.64971 |
| Ato_P10_P12_2_3_2-4_3_2 | 0.0968787  | 0.0971248  | 0.37145  | 1.62855 |
| Ato_P12_P14_2_3_4-5_3_3 | 0.0969557  | 0.0971558  | 0.268111 | 1.73189 |
| Ato_P6_P7_1_1_1-1_1_2   | 0.0971573  | 0.0971815  | 0.542296 | 1.4577  |
| Ato_P6_P7_1_1_1-1_2_1   | 0.0971934  | 0.0971273  | 0.542594 | 1.45741 |
| Ato_P11_P15_3_1_4-4_4_4 | 0.0970163  | 0.0972259  | 0.24547  | 1.75453 |
| Ato_P10_P15_2_2_3-4_3_5 | 0.0970824  | 0.0972494  | 0.368309 | 1.63169 |
| Ato_P10_P15_2_3_2-4_5_3 | 0.097158   | 0.0972536  | 0.369068 | 1.63093 |
| Ato_P11_P15_3_4_1-4_4_4 | 0.09726    | 0.0971957  | 0.245197 | 1.7548  |
| Ato_P8_P12_1_3_1-1_4_4  | 0.097204   | 0.0972647  | 0.632235 | 1.36776 |
| Ato_P9_P10_2_1_3-2_2_3  | 0.0972357  | 0.0972769  | 0.326971 | 1.67303 |
| Ato_P9_P10_2_3_1-2_3_2  | 0.0972889  | 0.0972981  | 0.327299 | 1.6727  |
| Ato_P12_P13_1_4_4-2_5_3 | 0.0970929  | 0.0973031  | 0.384446 | 1.61555 |
| Ato_P12_P13_1_4_4-2_3_5 | 0.0972203  | 0.0973611  | 0.384525 | 1.61547 |
| Ato_P10_P17_2_1_4-5_5_4 | 0.0971771  | 0.097416   | 0.304849 | 1.69515 |
| Ato_P7_P8_1_1_2-2_2_1   | 0.0972955  | 0.0974517  | 0.520892 | 1.47911 |
| Ato_P10_P17_2_4_1-5_4_5 | 0.0974555  | 0.0974375  | 0.30449  | 1.69551 |
| Ato_P7_P8_1_2_1-2_1_2   | 0.0974107  | 0.0974593  | 0.521529 | 1.47847 |
| Ato_P10_P13_2_1_4-3_3_4 | 0.0974729  | 0.0975211  | 0.338433 | 1.66157 |
| Ato_P6_P10_1_1_1-2_3_2  | 0.0975711  | 0.0975596  | 0.434439 | 1.56556 |
| Ato_P10_P13_3_3_1-3_3_4 | 0.0975833  | 0.0975814  | 0.44222  | 1.55778 |
| Ato_P10_P13_3_1_3-3_4_3 | 0.0976232  | 0.0975827  | 0.441641 | 1.55836 |
| Ato_P6_P10_1_1_1-2_2_3  | 0.0976326  | 0.0976154  | 0.43437  | 1.56563 |
| Ato_P10_P12_2_1_4-3_3_3 | 0.0975938  | 0.0976821  | 0.288214 | 1.71179 |
| Ato_P10_P12_2_1_4-2_3_4 | 0.0976074  | 0.0976896  | 0.368614 | 1.63139 |
| Ato_P10_P12_2_4_1-3_3_3 | 0.0976292  | 0.097704   | 0.288403 | 1.7116  |
| Ato_P13_P15_3_5_2-5_3_4 | 0.0977545  | 0.097806   | 0.268053 | 1.73195 |
| Ato_P10_P13_2_4_1-3_4_3 | 0.0978094  | 0.0977469  | 0.33948  | 1.66052 |
| Ato_P13_P15_3_2_5-5_4_3 | 0.0976595  | 0.0978205  | 0.268464 | 1.73154 |
| Ato_P11_P12_1_4_3-3_4_2 | 0.0978738  | 0.0978616  | 0.457173 | 1.54283 |
| Ato_P14_P15_4_2_5-4_3_5 | 0.0978481  | 0.0981004  | 0.217761 | 1.78224 |
| Ato_P16_P17_5_5_3-5_4_5 | 0.098031   | 0.0981058  | 0.267799 | 1.7322  |

| name                    | $\Delta_l$ | $\Delta_a$ | $c_l$    | $c_a$   |
|-------------------------|------------|------------|----------|---------|
| Ato_P14_P15_4_5_2-4_5_3 | 0.0977167  | 0.0981141  | 0.218168 | 1.78183 |
| Ato_P16_P17_5_3_5-5_5_4 | 0.0980245  | 0.0981199  | 0.26748  | 1.73252 |
| Ato_P8_P14_2_1_2-3_4_4  | 0.0980208  | 0.0981207  | 0.52395  | 1.47605 |
| Ato_P8_P14_2_2_1-3_4_4  | 0.0981049  | 0.0981463  | 0.523672 | 1.47633 |
| Ato_P11_P15_4_3_1-2_5_5 | 0.0983335  | 0.0983709  | 0.216905 | 1.7831  |
| Ato_P11_P15_4_1_3-2_5_5 | 0.0981969  | 0.0983837  | 0.216723 | 1.78328 |
| Ato_P13_P17_4_2_4-5_5_4 | 0.0984525  | 0.0984258  | 0.246182 | 1.75382 |
| Ato_P10_P12_2_4_1-2_4_3 | 0.0984589  | 0.0984784  | 0.37081  | 1.62919 |
| Ato_P13_P17_4_4_2-5_4_5 | 0.0984161  | 0.0984861  | 0.246511 | 1.75349 |
| Ato_P13_P14_4_3_3-3_5_3 | 0.0983472  | 0.0984862  | 0.31775  | 1.68225 |
| Ato_P13_P14_4_3_3-3_3_5 | 0.0982754  | 0.0985087  | 0.317544 | 1.68246 |
| Ato_P14_P14_3_3_5-4_2_5 | 0.098451   | 0.0985428  | 0.295931 | 1.70407 |
| Ato_P9_P11_2_2_2-3_3_2  | 0.0985469  | 0.0985669  | 0.559533 | 1.44047 |
| Ato_P14_P14_3_5_3-4_5_2 | 0.0984647  | 0.0985686  | 0.295423 | 1.70458 |
| Ato_P11_P15_4_2_2-3_4_5 | 0.0985711  | 0.0986331  | 0.375332 | 1.62467 |
| Ato_P9_P11_2_2_2-3_2_3  | 0.0986406  | 0.098631   | 0.56029  | 1.43971 |
| Ato_P11_P15_4_2_2-3_5_4 | 0.0985582  | 0.0986939  | 0.375357 | 1.62464 |
| Ato_P14_P14_4_2_5-4_4_3 | 0.0987053  | 0.0987858  | 0.265385 | 1.73462 |
| Ato_P14_P14_4_3_4-4_5_2 | 0.0984798  | 0.098798   | 0.265257 | 1.73474 |
| Ato_P10_P16_3_1_3-4_5_4 | 0.0986434  | 0.0988573  | 0.44504  | 1.55496 |
| Ato_P10_P16_3_3_1-4_4_5 | 0.0988224  | 0.09888    | 0.445868 | 1.55413 |
| Ato_P11_P13_3_4_1-2_4_4 | 0.0988926  | 0.099096   | 0.245204 | 1.7548  |
| Ato_P11_P13_3_1_4-2_4_4 | 0.0988073  | 0.0991635  | 0.245263 | 1.75474 |
| Ato_P9_P10_1_4_1-3_1_3  | 0.0992086  | 0.0916613  | 0.467735 | 1.53226 |
| Ato_P9_P10_1_1_4-3_3_1  | 0.0992896  | 0.0917051  | 0.467735 | 1.53226 |
| Ato_P12_P17_4_1_4-4_5_5 | 0.0991028  | 0.0993346  | 0.277837 | 1.72216 |
| Ato_P12_P17_4_4_1-4_5_5 | 0.0991647  | 0.0993622  | 0.277956 | 1.72204 |
| Ato_P12_P17_2_2_5-5_4_5 | 0.0991338  | 0.0993854  | 0.275604 | 1.7244  |
| Ato_P13_P18_4_4_2-5_5_5 | 0.0993657  | 0.0994363  | 0.280721 | 1.71928 |
| Ato_P13_P18_4_2_4-5_5_5 | 0.0993957  | 0.0994565  | 0.280434 | 1.71957 |
| Ato_P12_P17_2_5_2-5_5_4 | 0.0994571  | 0.0993576  | 0.274622 | 1.72538 |
| Ato_P12_P16_4_4_1-4_4_5 | 0.0995059  | 0.0994569  | 0.329733 | 1.67027 |
| Ato_P12_P16_4_1_4-4_5_4 | 0.0994615  | 0.0995399  | 0.330166 | 1.66983 |
| Ato_P10_P14_2_3_2-5_3_3 | 0.0995933  | 0.0996816  | 0.345467 | 1.65453 |
| Ato_P14_P15_3_4_4-5_5_2 | 0.0996789  | 0.0998121  | 0.226965 | 1.77303 |
| Ato_P15_P16_5_3_4-5_3_5 | 0.0997288  | 0.0998323  | 0.328937 | 1.67106 |
| Ato_P12_P13_3_2_4-4_4_2 | 0.0998317  | 0.0999128  | 0.313716 | 1.68628 |
| Ato_P15_P17_5_3_4-5_4_5 | 0.0998437  | 0.0999197  | 0.260946 | 1.73905 |
| Ato_P15_P16_5_4_3-5_5_3 | 0.0999142  | 0.0999288  | 0.328321 | 1.67168 |



| name                    | $\Delta_l$ | $\Delta_a$ | $c_l$    | $c_a$   |
|-------------------------|------------|------------|----------|---------|
| Ato_P12_P13_3_4_2-4_2_4 | 0.0997554  | 0.0999309  | 0.314136 | 1.68586 |
| Ato_P9_P13_1_3_2-2_4_4  | 0.0998839  | 0.0999491  | 0.667252 | 1.33275 |
| Ato_P9_P13_1_2_3-2_4_4  | 0.0998426  | 0.099965   | 0.667157 | 1.33284 |

## 5 Regular Atco P-cages

| name                     | name |
|--------------------------|------|
| Atco_P12_P12_4_2_3-4_2_3 |      |

## 6 Near Miss Atco P-cages

| name                     | $\Delta_l$ | $\Delta_a$ | $c_l$    | $c_a$   |
|--------------------------|------------|------------|----------|---------|
| Atco_P15_P15_5_3_4-5_3_4 | 0.00130813 | 0.00130858 | 0.262457 | 1.73754 |
| Atco_P11_P12_4_1_3-3_3_3 | 0.00149262 | 0.00149311 | 0.435357 | 1.56464 |
| Atco_P9_P11_2_2_2-4_1_3  | 0.00159187 | 0.00159267 | 0.448115 | 1.55189 |
| Atco_P6_P11_1_1_1-4_1_3  | 0.00177636 | 0.00177919 | 0.523914 | 1.47609 |
| Atco_P11_P12_4_2_2-3_2_4 | 0.00331297 | 0.00332118 | 0.287306 | 1.71269 |
| Atco_P15_P16_5_3_4-5_3_5 | 0.004105   | 0.00410455 | 0.287555 | 1.71245 |
| Atco_P11_P12_3_2_3-4_2_3 | 0.00435252 | 0.00436278 | 0.285222 | 1.71478 |
| Atco_P13_P15_4_3_3-5_2_5 | 0.00742155 | 0.00742139 | 0.270806 | 1.72919 |
| Atco_P10_P15_3_2_2-5_2_5 | 0.00811306 | 0.00812681 | 0.367597 | 1.6324  |
| Atco_P9_P14_3_1_2-4_3_4  | 0.0082262  | 0.00822635 | 0.465481 | 1.53452 |
| Atco_P10_P13_3_2_2-4_2_4 | 0.00865119 | 0.00865102 | 0.332213 | 1.66779 |
| Atco_P16_P16_5_3_5-5_3_5 | 0.00868604 | 0.00869885 | 0.318685 | 1.68131 |
| Atco_P9_P13_4_1_1-2_3_5  | 0.00888906 | 0.00890213 | 0.338439 | 1.66156 |
| Atco_P13_P15_5_2_3-4_3_5 | 0.0091288  | 0.00915612 | 0.201979 | 1.79802 |
| Atco_P10_P10_3_1_3-3_2_2 | 0.00915133 | 0.00915976 | 0.308142 | 1.69186 |
| Atco_P10_P13_3_1_3-4_3_3 | 0.00927396 | 0.0092917  | 0.432598 | 1.5674  |
| Atco_P11_P12_3_1_4-4_3_2 | 0.00939398 | 0.0093951  | 0.433554 | 1.56645 |
| Atco_P12_P16_4_2_3-5_3_5 | 0.00997538 | 0.00997614 | 0.182998 | 1.817   |
| Atco_P12_P14_5_2_2-3_3_5 | 0.0102024  | 0.0102371  | 0.254416 | 1.74558 |
| Atco_P15_P16_5_2_5-5_4_4 | 0.010291   | 0.010307   | 0.312847 | 1.68715 |
| Atco_P14_P14_4_3_4-5_2_4 | 0.0104801  | 0.0105068  | 0.284801 | 1.7152  |
| Atco_P11_P12_2_2_4-5_2_2 | 0.0105389  | 0.0105521  | 0.403627 | 1.59637 |
| Atco_P9_P13_2_1_3-5_3_2  | 0.0111243  | 0.0111201  | 0.412909 | 1.58709 |
| Atco_P10_P10_2_1_4-4_2_1 | 0.0111804  | 0.0111776  | 0.32002  | 1.67998 |
| Atco_P12_P14_4_2_3-4_3_4 | 0.0112006  | 0.0112015  | 0.306192 | 1.69381 |
| Atco_P10_P10_2_2_3-4_1_2 | 0.0113283  | 0.0113394  | 0.28044  | 1.71956 |
| Atco_P10_P13_4_1_2-3_3_4 | 0.0119356  | 0.011944   | 0.520062 | 1.47994 |
| Atco_P9_P11_3_2_1-3_1_4  | 0.0120003  | 0.012022   | 0.44988  | 1.55012 |
| Atco_P8_P12_2_1_2-4_2_3  | 0.0121267  | 0.0121408  | 0.287051 | 1.71295 |
| Atco_P14_P16_5_2_4-5_4_4 | 0.012137   | 0.0121725  | 0.302122 | 1.69788 |

| name                     | $\Delta_l$ | $\Delta_a$ | $c_l$    | $c_a$   |
|--------------------------|------------|------------|----------|---------|
| Atco_P14_P14_4_2_5-5_3_3 | 0.0122963  | 0.0123181  | 0.262112 | 1.73789 |
| Atco_P8_P11_3_1_1-2_2_4  | 0.0123645  | 0.0123753  | 0.521935 | 1.47806 |
| Atco_P13_P13_4_2_4-4_3_3 | 0.0124437  | 0.0124833  | 0.276782 | 1.72322 |
| Atco_P8_P15_2_1_2-5_3_4  | 0.0131173  | 0.0131402  | 0.525242 | 1.47476 |
| Atco_P11_P15_4_2_2-4_3_5 | 0.0135122  | 0.0135263  | 0.215159 | 1.78484 |
| Atco_P15_P15_5_2_5-5_4_3 | 0.0135492  | 0.0135579  | 0.24133  | 1.75867 |
| Atco_P13_P13_3_3_4-5_2_3 | 0.0139104  | 0.0139288  | 0.263119 | 1.73688 |
| Atco_P13_P15_4_2_4-5_3_4 | 0.0141794  | 0.0141908  | 0.292901 | 1.7071  |
| Atco_P13_P13_3_2_5-5_3_2 | 0.01419    | 0.0142091  | 0.311527 | 1.68847 |
| Atco_P8_P14_3_1_1-3_3_5  | 0.0143106  | 0.0143335  | 0.299395 | 1.70061 |
| Atco_P7_P12_1_1_2-5_2_2  | 0.0148554  | 0.0148547  | 0.405669 | 1.59433 |
| Atco_P12_P17_4_2_3-5_4_5 | 0.0148937  | 0.014894   | 0.244835 | 1.75517 |
| Atco_P13_P14_4_2_4-5_3_3 | 0.0149301  | 0.0149302  | 0.345841 | 1.65416 |
| Atco_P7_P8_1_1_2-3_1_1   | 0.0155504  | 0.0155468  | 0.527027 | 1.47297 |
| Atco_P12_P13_4_2_3-4_2_4 | 0.0155744  | 0.0155397  | 0.278555 | 1.72145 |
| Atco_P14_P16_5_3_3-5_3_5 | 0.0155669  | 0.0155848  | 0.195668 | 1.80433 |
| Atco_P9_P11_3_1_2-3_2_3  | 0.0157149  | 0.0157231  | 0.35338  | 1.64662 |
| Atco_P11_P14_4_2_2-4_2_5 | 0.0158052  | 0.015805   | 0.321316 | 1.67868 |
| Atco_P12_P14_4_3_2-4_2_5 | 0.0159009  | 0.015942   | 0.328898 | 1.6711  |
| Atco_P7_P14_2_1_1-4_2_5  | 0.0162884  | 0.0162893  | 0.313995 | 1.686   |
| Atco_P13_P14_4_3_3-5_2_4 | 0.0164762  | 0.0164618  | 0.324556 | 1.67544 |
| Atco_P12_P13_5_2_2-3_2_5 | 0.0165575  | 0.0165668  | 0.269687 | 1.73031 |
| Atco_P12_P14_3_2_4-5_3_3 | 0.016892   | 0.0168995  | 0.288011 | 1.71199 |
| Atco_P14_P15_5_3_3-4_3_5 | 0.0168856  | 0.0169235  | 0.263116 | 1.73688 |
| Atco_P9_P11_2_1_3-4_2_2  | 0.0175024  | 0.0175227  | 0.357368 | 1.64263 |
| Atco_P13_P16_4_2_4-5_4_4 | 0.0175798  | 0.0175855  | 0.259291 | 1.74071 |
| Atco_P10_P13_2_2_3-5_2_3 | 0.0177288  | 0.0177208  | 0.260695 | 1.73931 |
| Atco_P12_P15_4_2_3-5_3_4 | 0.0179867  | 0.0179869  | 0.324075 | 1.67592 |
| Atco_P14_P18_5_2_4-5_5_5 | 0.0181625  | 0.0181688  | 0.244015 | 1.75598 |
| Atco_P10_P16_3_2_2-5_3_5 | 0.018396   | 0.0183879  | 0.352596 | 1.6474  |
| Atco_P15_P17_5_2_5-5_5_4 | 0.0184067  | 0.0184071  | 0.245158 | 1.75484 |
| Atco_P14_P15_5_2_4-5_3_4 | 0.0187583  | 0.0187715  | 0.362871 | 1.63713 |
| Atco_P14_P15_5_2_4-4_4_4 | 0.0189572  | 0.0189946  | 0.271849 | 1.72815 |
| Atco_P12_P13_3_2_4-5_2_3 | 0.0189922  | 0.0190113  | 0.245558 | 1.75444 |
| Atco_P11_P15_3_2_3-5_3_4 | 0.0193161  | 0.019308   | 0.234964 | 1.76504 |
| Atco_P13_P14_5_2_3-4_3_4 | 0.0195805  | 0.0195812  | 0.350496 | 1.6495  |
| Atco_P12_P14_3_3_3-5_2_4 | 0.0196293  | 0.0196204  | 0.305354 | 1.69465 |
| Atco_P8_P8_2_1_2-2_1_2   | 0.019653   | 0.0196574  | 0.6263   | 1.3737  |
| Atco_P8_P14_2_1_2-5_3_3  | 0.0201829  | 0.0202078  | 0.451965 | 1.54803 |

| name                     | $\Delta_l$ | $\Delta_a$ | $c_l$    | $c_a$   |
|--------------------------|------------|------------|----------|---------|
| Atco_P14_P16_4_3_4-5_3_5 | 0.0202751  | 0.0202945  | 0.257068 | 1.74293 |
| Atco_P14_P15_4_2_5-5_4_3 | 0.0203037  | 0.0203075  | 0.247193 | 1.75281 |
| Atco_P10_P13_4_2_1-3_2_5 | 0.0204503  | 0.0204669  | 0.365461 | 1.63454 |
| Atco_P13_P14_5_3_2-4_2_5 | 0.0205724  | 0.0206481  | 0.328841 | 1.67116 |
| Atco_P13_P16_4_3_3-5_3_5 | 0.0207965  | 0.0208221  | 0.274577 | 1.72542 |
| Atco_P7_P13_2_1_1-4_2_4  | 0.0209119  | 0.020924   | 0.509945 | 1.49005 |
| Atco_P14_P16_5_2_4-5_3_5 | 0.0208929  | 0.020997   | 0.196899 | 1.8031  |
| Atco_P15_P17_5_3_4-5_4_5 | 0.020985   | 0.0210136  | 0.27058  | 1.72942 |
| Atco_P7_P12_2_1_1-3_2_4  | 0.0213623  | 0.0213721  | 0.540152 | 1.45985 |
| Atco_P13_P13_4_2_4-4_2_4 | 0.021828   | 0.0218145  | 0.261905 | 1.7381  |
| Atco_P14_P15_5_3_3-5_2_5 | 0.0218891  | 0.0219203  | 0.262023 | 1.73798 |
| Atco_P15_P16_5_3_4-5_4_4 | 0.0220506  | 0.0220757  | 0.285785 | 1.71422 |
| Atco_P14_P15_4_4_3-5_2_5 | 0.022244   | 0.0222265  | 0.281613 | 1.71839 |
| Atco_P11_P13_3_1_4-5_3_2 | 0.0222508  | 0.0222859  | 0.323931 | 1.67607 |
| Atco_P11_P13_3_2_3-5_2_3 | 0.0225173  | 0.0225638  | 0.359852 | 1.64015 |
| Atco_P9_P14_2_2_2-5_2_4  | 0.0227928  | 0.0228561  | 0.279092 | 1.72091 |
| Atco_P8_P12_2_2_1-4_1_4  | 0.022955   | 0.0229501  | 0.242374 | 1.75763 |
| Atco_P7_P15_2_1_1-4_3_5  | 0.0229752  | 0.0229747  | 0.529514 | 1.47049 |
| Atco_P10_P12_4_1_2-2_3_4 | 0.0231864  | 0.023222   | 0.521022 | 1.47898 |
| Atco_P15_P15_5_2_5-5_3_4 | 0.023225   | 0.0232443  | 0.214065 | 1.78594 |
| Atco_P8_P10_2_1_2-3_2_2  | 0.0232904  | 0.0233209  | 0.363657 | 1.63634 |
| Atco_P17_P17_5_4_5-5_4_5 | 0.0234328  | 0.0234884  | 0.234137 | 1.76586 |
| Atco_P12_P15_4_3_2-5_2_5 | 0.0235011  | 0.0235001  | 0.280065 | 1.71993 |
| Atco_P12_P13_4_1_4-4_3_3 | 0.0234604  | 0.0235102  | 0.24313  | 1.75687 |
| Atco_P16_P16_5_3_5-5_4_4 | 0.0237783  | 0.023762   | 0.205495 | 1.79451 |
| Atco_P15_P16_4_3_5-5_3_5 | 0.0237706  | 0.0238477  | 0.32672  | 1.67328 |
| Atco_P11_P13_3_2_3-4_2_4 | 0.0238692  | 0.0238657  | 0.326493 | 1.67351 |
| Atco_P12_P16_4_2_3-5_4_4 | 0.024142   | 0.0241414  | 0.367392 | 1.63261 |
| Atco_P10_P14_3_1_3-5_3_3 | 0.0242685  | 0.0242833  | 0.327617 | 1.67238 |
| Atco_P10_P14_3_2_2-4_2_5 | 0.0243604  | 0.0243576  | 0.31195  | 1.68805 |
| Atco_P10_P14_4_1_2-3_3_5 | 0.0244765  | 0.0245327  | 0.253981 | 1.74602 |
| Atco_P7_P16_2_1_1-5_3_5  | 0.0246001  | 0.0245931  | 0.469693 | 1.53031 |
| Atco_P6_P14_1_1_1-5_2_4  | 0.0246471  | 0.0246557  | 0.300739 | 1.69926 |
| Atco_P11_P14_4_1_3-4_3_4 | 0.0247307  | 0.0247477  | 0.249667 | 1.75033 |
| Atco_P8_P13_3_1_1-3_2_5  | 0.0248062  | 0.0248586  | 0.265152 | 1.73485 |
| Atco_P12_P13_4_2_3-4_3_3 | 0.0248975  | 0.0248888  | 0.349224 | 1.65078 |
| Atco_P9_P12_3_1_2-3_3_3  | 0.0248852  | 0.0249169  | 0.305968 | 1.69403 |
| Atco_P9_P10_4_1_1-1_2_4  | 0.0250947  | 0.0250918  | 0.433496 | 1.5665  |
| Atco_P9_P13_3_1_2-3_3_4  | 0.0253533  | 0.0253753  | 0.535695 | 1.4643  |

| name                     | $\Delta_l$ | $\Delta_a$ | $c_l$    | $c_a$   |
|--------------------------|------------|------------|----------|---------|
| Atco_P10_P12_4_2_1-2_2_5 | 0.0254251  | 0.0254131  | 0.47465  | 1.52535 |
| Atco_P11_P15_3_3_2-5_2_5 | 0.0254836  | 0.0254797  | 0.371327 | 1.62867 |
| Atco_P12_P15_4_2_3-4_3_5 | 0.0258452  | 0.0258561  | 0.36926  | 1.63074 |
| Atco_P12_P14_4_2_3-5_2_4 | 0.0261207  | 0.0261148  | 0.275884 | 1.72412 |
| Atco_P9_P11_4_1_1-2_2_4  | 0.0261238  | 0.0261092  | 0.507432 | 1.49257 |
| Atco_P7_P15_2_1_1-5_2_5  | 0.0261236  | 0.0261809  | 0.468237 | 1.53176 |
| Atco_P9_P9_2_2_2-3_1_2   | 0.0261041  | 0.0261812  | 0.361584 | 1.63842 |
| Atco_P12_P12_4_1_4-4_3_2 | 0.0261814  | 0.0261663  | 0.400034 | 1.59997 |
| Atco_P12_P12_3_2_4-5_2_2 | 0.0262845  | 0.0262811  | 0.447285 | 1.55271 |
| Atco_P13_P15_4_2_4-5_4_3 | 0.0264297  | 0.0264392  | 0.252404 | 1.7476  |
| Atco_P7_P8_2_1_1-2_1_2   | 0.0266219  | 0.0266222  | 0.355976 | 1.64402 |
| Atco_P9_P14_2_1_3-5_3_3  | 0.0266325  | 0.0266963  | 0.464478 | 1.53552 |
| Atco_P15_P15_4_3_5-5_3_4 | 0.0269287  | 0.0269195  | 0.289919 | 1.71008 |
| Atco_P14_P17_5_2_4-5_5_4 | 0.0271057  | 0.0271517  | 0.206164 | 1.79384 |
| Atco_P10_P12_3_2_2-4_2_3 | 0.0272281  | 0.0272342  | 0.310561 | 1.68944 |
| Atco_P14_P14_4_3_4-5_3_3 | 0.0273825  | 0.0274586  | 0.239243 | 1.76076 |
| Atco_P10_P12_2_2_3-5_2_2 | 0.0275535  | 0.0276227  | 0.379697 | 1.6203  |
| Atco_P14_P15_5_3_3-5_3_4 | 0.0277627  | 0.027835   | 0.254744 | 1.74526 |
| Atco_P7_P10_1_1_2-4_1_2  | 0.0278944  | 0.0279284  | 0.564665 | 1.43534 |
| Atco_P12_P13_3_2_4-5_3_2 | 0.0278866  | 0.0279674  | 0.275842 | 1.72416 |
| Atco_P10_P14_3_2_2-5_2_4 | 0.0280188  | 0.0280242  | 0.265606 | 1.73439 |
| Atco_P9_P9_2_1_3-3_2_1   | 0.02806    | 0.028074   | 0.335898 | 1.6641  |
| Atco_P15_P18_5_2_5-5_5_5 | 0.0282555  | 0.028263   | 0.302483 | 1.69752 |
| Atco_P11_P13_4_2_2-4_2_4 | 0.0282841  | 0.0283133  | 0.430835 | 1.56917 |
| Atco_P13_P14_5_2_3-3_3_5 | 0.0283417  | 0.0283721  | 0.363752 | 1.63625 |
| Atco_P10_P13_2_1_4-5_3_2 | 0.0283966  | 0.0284067  | 0.450982 | 1.54902 |
| Atco_P9_P15_3_1_2-4_3_5  | 0.0284075  | 0.0284238  | 0.33419  | 1.66581 |
| Atco_P10_P12_3_2_2-4_1_4 | 0.0284271  | 0.0284491  | 0.334664 | 1.66534 |
| Atco_P11_P14_3_2_3-5_3_3 | 0.0284797  | 0.0285399  | 0.262435 | 1.73757 |
| Atco_P16_P17_5_3_5-5_4_5 | 0.0285172  | 0.0285464  | 0.227688 | 1.77231 |
| Atco_P13_P14_4_3_3-4_2_5 | 0.0287146  | 0.0287409  | 0.358821 | 1.64118 |
| Atco_P14_P16_5_2_4-4_4_5 | 0.0287667  | 0.0287976  | 0.317932 | 1.68207 |
| Atco_P9_P14_3_2_1-4_2_5  | 0.0289166  | 0.0289378  | 0.153869 | 1.84613 |
| Atco_P9_P9_1_2_3-4_1_1   | 0.0289813  | 0.028995   | 0.437143 | 1.56286 |
| Atco_P11_P13_4_2_2-3_2_5 | 0.0292965  | 0.0293094  | 0.382015 | 1.61798 |
| Atco_P13_P15_5_2_3-4_4_4 | 0.0293211  | 0.0293061  | 0.241916 | 1.75808 |
| Atco_P11_P13_4_1_3-4_3_3 | 0.0293981  | 0.0294398  | 0.448316 | 1.55168 |
| Atco_P10_P12_3_1_3-4_3_2 | 0.0293955  | 0.029493   | 0.456049 | 1.54395 |
| Atco_P15_P17_5_2_5-5_4_5 | 0.0295166  | 0.0294998  | 0.301073 | 1.69893 |

| name                     | $\Delta_l$ | $\Delta_a$ | $c_l$    | $c_a$   |
|--------------------------|------------|------------|----------|---------|
| Atco_P8_P9_2_1_2-3_1_2   | 0.0297005  | 0.0297171  | 0.349482 | 1.65052 |
| Atco_P13_P18_5_2_3-5_5_5 | 0.0296835  | 0.0297413  | 0.234353 | 1.76565 |
| Atco_P12_P15_5_2_2-4_3_5 | 0.0297966  | 0.029818   | 0.339119 | 1.66088 |
| Atco_P14_P14_5_2_4-5_2_4 | 0.029862   | 0.0299506  | 0.195719 | 1.80428 |
| Atco_P14_P17_5_3_3-5_4_5 | 0.0299997  | 0.0300463  | 0.213127 | 1.78687 |
| Atco_P14_P14_4_2_5-5_4_2 | 0.0301083  | 0.0302279  | 0.193508 | 1.80649 |
| Atco_P16_P16_5_4_4-5_4_4 | 0.0304861  | 0.0304997  | 0.239222 | 1.76078 |
| Atco_P9_P16_3_1_2-5_3_5  | 0.0304531  | 0.0305093  | 0.29197  | 1.70803 |
| Atco_P15_P15_4_4_4-5_2_5 | 0.0305696  | 0.0306127  | 0.293056 | 1.70694 |
| Atco_P10_P11_3_1_3-3_3_2 | 0.0307202  | 0.0307347  | 0.319745 | 1.68026 |
| Atco_P9_P13_3_2_1-3_2_5  | 0.030721   | 0.0307444  | 0.464373 | 1.53563 |
| Atco_P9_P12_4_1_1-2_2_5  | 0.0309091  | 0.0309075  | 0.28171  | 1.71829 |
| Atco_P13_P18_4_2_4-5_5_5 | 0.0308895  | 0.0309168  | 0.27192  | 1.72808 |
| Atco_P10_P11_4_2_1-2_2_4 | 0.0309896  | 0.0310396  | 0.340717 | 1.65928 |
| Atco_P11_P14_4_2_2-3_3_5 | 0.0310663  | 0.0310874  | 0.361166 | 1.63883 |
| Atco_P15_P16_5_4_3-5_3_5 | 0.0311797  | 0.0312616  | 0.221559 | 1.77844 |
| Atco_P13_P14_4_2_4-4_3_4 | 0.0312933  | 0.0312917  | 0.299592 | 1.70041 |
| Atco_P13_P14_5_2_3-4_2_5 | 0.0312909  | 0.0312996  | 0.216519 | 1.78348 |
| Atco_P14_P14_4_4_3-5_2_4 | 0.031358   | 0.0313578  | 0.250761 | 1.74924 |
| Atco_P8_P10_1_1_3-4_2_1  | 0.0314335  | 0.0314497  | 0.492837 | 1.50716 |
| Atco_P13_P14_3_3_4-5_2_4 | 0.0314716  | 0.0314986  | 0.311577 | 1.68842 |
| Atco_P11_P16_4_2_2-5_3_5 | 0.0315546  | 0.0315992  | 0.46241  | 1.53759 |
| Atco_P11_P13_4_1_3-3_3_4 | 0.0320873  | 0.0320922  | 0.362272 | 1.63773 |
| Atco_P7_P13_1_1_2-5_2_3  | 0.0322146  | 0.0322121  | 0.377043 | 1.62296 |
| Atco_P10_P11_2_2_3-4_2_2 | 0.0322724  | 0.0322591  | 0.337564 | 1.66244 |
| Atco_P13_P17_5_2_3-4_5_5 | 0.0321989  | 0.0322892  | 0.248928 | 1.75107 |
| Atco_P12_P13_3_3_3-5_2_3 | 0.0322985  | 0.0322954  | 0.26743  | 1.73257 |
| Atco_P12_P13_5_2_2-2_3_5 | 0.0323679  | 0.0323735  | 0.380189 | 1.61981 |
| Atco_P13_P14_4_2_4-5_2_4 | 0.0328726  | 0.0328874  | 0.268819 | 1.73118 |
| Atco_P16_P18_5_3_5-5_5_5 | 0.0329831  | 0.0330376  | 0.236874 | 1.76313 |
| Atco_P10_P11_3_2_2-3_2_3 | 0.0331613  | 0.0331623  | 0.300976 | 1.69902 |
| Atco_P13_P15_4_3_3-5_3_4 | 0.0331765  | 0.0331765  | 0.229866 | 1.77013 |
| Atco_P9_P12_2_1_3-4_3_2  | 0.0331788  | 0.0331671  | 0.321456 | 1.67854 |
| Atco_P11_P13_4_2_2-3_3_4 | 0.0332332  | 0.0332143  | 0.298417 | 1.70158 |
| Atco_P13_P15_5_3_2-4_3_5 | 0.033284   | 0.0332807  | 0.222479 | 1.77752 |
| Atco_P10_P12_3_2_2-3_2_4 | 0.0333864  | 0.0333877  | 0.375768 | 1.62423 |
| Atco_P8_P14_2_1_2-5_2_4  | 0.0334354  | 0.0334565  | 0.272547 | 1.72745 |
| Atco_P8_P12_3_1_1-3_2_4  | 0.0334054  | 0.033458   | 0.494127 | 1.50587 |
| Atco_P10_P11_4_1_2-2_3_3 | 0.0335702  | 0.0335817  | 0.342311 | 1.65769 |

| name                     | $\Delta_l$ | $\Delta_a$ | $c_l$    | $c_a$   |
|--------------------------|------------|------------|----------|---------|
| Atco_P12_P13_3_2_4-4_2_4 | 0.0335854  | 0.0336052  | 0.506792 | 1.49321 |
| Atco_P12_P12_2_3_4-5_2_2 | 0.0336575  | 0.0336417  | 0.321107 | 1.67889 |
| Atco_P12_P15_3_3_3-5_2_5 | 0.0337282  | 0.0337406  | 0.319474 | 1.68053 |
| Atco_P11_P14_3_1_4-5_3_3 | 0.0338961  | 0.0339636  | 0.297225 | 1.70278 |
| Atco_P12_P12_3_2_4-4_2_3 | 0.0339307  | 0.0339832  | 0.460376 | 1.53962 |
| Atco_P11_P11_3_2_3-4_1_3 | 0.0340741  | 0.0340725  | 0.258013 | 1.74199 |
| Atco_P6_P9_1_1_1-3_1_2   | 0.0341366  | 0.0341472  | 0.383707 | 1.61629 |
| Atco_P10_P15_4_1_2-4_3_5 | 0.0341574  | 0.0341645  | 0.266709 | 1.73329 |
| Atco_P8_P9_1_1_3-4_1_1   | 0.0341601  | 0.0341664  | 0.39294  | 1.60706 |
| Atco_P12_P13_5_2_2-3_3_4 | 0.0341274  | 0.0341844  | 0.299512 | 1.70049 |
| Atco_P14_P16_4_2_5-5_4_4 | 0.0342625  | 0.0342762  | 0.303861 | 1.69614 |
| Atco_P10_P12_3_1_3-4_2_3 | 0.0342614  | 0.0342798  | 0.285085 | 1.71492 |
| Atco_P14_P15_4_3_4-5_2_5 | 0.0344604  | 0.0344587  | 0.289683 | 1.71032 |
| Atco_P12_P15_5_2_2-3_4_5 | 0.0344248  | 0.0344632  | 0.274607 | 1.72539 |
| Atco_P14_P15_5_2_4-4_3_5 | 0.0344252  | 0.0344958  | 0.288192 | 1.71181 |
| Atco_P12_P12_3_3_3-4_1_4 | 0.0345508  | 0.0345566  | 0.416084 | 1.58392 |
| Atco_P12_P12_3_2_4-4_3_2 | 0.0345186  | 0.0345926  | 0.33902  | 1.66098 |
| Atco_P13_P13_4_3_3-4_3_3 | 0.0345512  | 0.0346334  | 0.276459 | 1.72354 |
| Atco_P13_P13_4_2_4-5_2_3 | 0.0346801  | 0.0347409  | 0.333995 | 1.66601 |
| Atco_P14_P15_5_2_4-5_4_3 | 0.0347044  | 0.0347745  | 0.287914 | 1.71209 |
| Atco_P10_P15_3_1_3-5_3_4 | 0.0347887  | 0.0348125  | 0.328513 | 1.67149 |
| Atco_P11_P16_3_2_3-5_3_5 | 0.0347958  | 0.0348377  | 0.30327  | 1.69673 |
| Atco_P12_P17_4_2_3-5_5_4 | 0.0348868  | 0.0348859  | 0.333216 | 1.66678 |
| Atco_P8_P10_3_1_1-2_2_3  | 0.0349707  | 0.034966   | 0.421499 | 1.5785  |
| Atco_P13_P15_5_2_3-3_4_5 | 0.0349721  | 0.0349713  | 0.310492 | 1.68951 |
| Atco_P9_P12_2_1_3-5_2_2  | 0.0350176  | 0.0350167  | 0.288742 | 1.71126 |
| Atco_P11_P15_4_1_3-5_3_4 | 0.0350638  | 0.0350545  | 0.46001  | 1.53999 |
| Atco_P12_P12_2_2_5-5_2_2 | 0.0350564  | 0.0351018  | 0.411579 | 1.58842 |
| Atco_P14_P17_5_2_4-4_5_5 | 0.0353591  | 0.0353722  | 0.289083 | 1.71092 |
| Atco_P12_P14_4_2_3-4_2_5 | 0.0354797  | 0.0354644  | 0.324269 | 1.67573 |
| Atco_P13_P14_5_3_2-3_3_5 | 0.035427   | 0.0355209  | 0.288403 | 1.7116  |
| Atco_P9_P10_3_2_1-2_1_4  | 0.0355463  | 0.0355349  | 0.480296 | 1.5197  |
| Atco_P12_P15_4_2_3-5_2_5 | 0.0355899  | 0.0355984  | 0.304435 | 1.69556 |
| Atco_P11_P11_3_2_3-4_2_2 | 0.0356223  | 0.0356017  | 0.342545 | 1.65745 |
| Atco_P11_P11_3_2_3-3_2_3 | 0.0360268  | 0.0360345  | 0.443436 | 1.55656 |
| Atco_P12_P18_4_2_3-5_5_5 | 0.0359862  | 0.0360433  | 0.243784 | 1.75622 |
| Atco_P14_P16_5_3_3-4_4_5 | 0.0359807  | 0.0360521  | 0.237987 | 1.76201 |
| Atco_P8_P13_2_1_2-4_3_3  | 0.0360528  | 0.0360734  | 0.340053 | 1.65995 |
| Atco_P13_P14_5_2_3-3_4_4 | 0.0360637  | 0.0360849  | 0.274943 | 1.72506 |

| name                     | $\Delta_l$ | $\Delta_a$ | $c_l$    | $c_a$   |
|--------------------------|------------|------------|----------|---------|
| Atco_P12_P13_4_3_2-4_2_4 | 0.036195   | 0.036221   | 0.224487 | 1.77551 |
| Atco_P13_P14_3_2_5-5_3_3 | 0.0362245  | 0.0362478  | 0.371012 | 1.62899 |
| Atco_P7_P9_2_1_1-2_1_3   | 0.0364992  | 0.0365264  | 0.492787 | 1.50721 |
| Atco_P8_P15_3_1_1-4_3_5  | 0.0364934  | 0.0365359  | 0.38087  | 1.61913 |
| Atco_P13_P15_4_3_3-4_3_5 | 0.0365443  | 0.0366003  | 0.281011 | 1.71899 |
| Atco_P13_P16_3_3_4-5_3_5 | 0.0365809  | 0.0366376  | 0.270276 | 1.72972 |
| Atco_P10_P11_2_1_4-4_3_1 | 0.0367272  | 0.0366974  | 0.369705 | 1.6303  |
| Atco_P11_P14_4_2_2-4_3_4 | 0.036881   | 0.0369039  | 0.254732 | 1.74527 |
| Atco_P14_P15_4_3_4-4_3_5 | 0.0371553  | 0.0371237  | 0.308483 | 1.69152 |
| Atco_P8_P15_2_2_1-5_2_5  | 0.0371394  | 0.0371624  | 0.318798 | 1.6812  |
| Atco_P12_P16_4_2_3-4_4_5 | 0.0372662  | 0.0372762  | 0.3174   | 1.6826  |
| Atco_P12_P14_4_1_4-5_3_3 | 0.0372106  | 0.0373455  | 0.238079 | 1.76192 |
| Atco_P8_P13_2_1_2-5_2_3  | 0.0374727  | 0.0374928  | 0.293908 | 1.70609 |
| Atco_P9_P10_3_1_2-2_2_3  | 0.0375035  | 0.0375253  | 0.511403 | 1.4886  |
| Atco_P11_P11_3_1_4-4_2_2 | 0.0375161  | 0.0375694  | 0.253401 | 1.7466  |
| Atco_P11_P16_4_2_2-4_4_5 | 0.0375572  | 0.0375775  | 0.268753 | 1.73125 |
| Atco_P15_P15_4_3_5-5_4_3 | 0.0376414  | 0.0376993  | 0.25686  | 1.74314 |
| Atco_P9_P15_3_1_2-5_3_4  | 0.0378679  | 0.0378678  | 0.503501 | 1.4965  |
| Atco_P9_P15_2_2_2-5_2_5  | 0.0378756  | 0.0379343  | 0.396674 | 1.60333 |
| Atco_P10_P12_3_1_3-3_3_3 | 0.0380739  | 0.0381093  | 0.440372 | 1.55963 |
| Atco_P13_P15_3_3_4-5_3_4 | 0.0381971  | 0.0381862  | 0.288697 | 1.7113  |
| Atco_P14_P16_4_3_4-5_4_4 | 0.0383106  | 0.0383     | 0.291013 | 1.70899 |
| Atco_P13_P15_4_2_4-5_2_5 | 0.038325   | 0.0383706  | 0.320085 | 1.67992 |
| Atco_P9_P12_2_2_2-4_1_4  | 0.038375   | 0.0384011  | 0.429136 | 1.57086 |
| Atco_P7_P10_2_1_1-3_1_3  | 0.0384182  | 0.0384262  | 0.31622  | 1.68378 |
| Atco_P8_P13_3_1_1-2_3_5  | 0.0384283  | 0.0383918  | 0.516768 | 1.48323 |
| Atco_P14_P14_5_2_4-5_3_3 | 0.0384531  | 0.0384474  | 0.352847 | 1.64715 |
| Atco_P11_P14_3_2_3-4_3_4 | 0.0384507  | 0.0384546  | 0.365187 | 1.63481 |
| Atco_P8_P9_3_1_1-2_1_3   | 0.0384789  | 0.0385025  | 0.427861 | 1.57214 |
| Atco_P12_P15_4_3_2-4_3_5 | 0.0384906  | 0.0385283  | 0.325509 | 1.67449 |
| Atco_P12_P16_5_2_2-4_4_5 | 0.0385043  | 0.0385389  | 0.250677 | 1.74932 |
| Atco_P7_P11_1_1_2-4_2_2  | 0.0386211  | 0.0386219  | 0.40356  | 1.59644 |
| Atco_P8_P11_2_1_2-4_2_2  | 0.0386092  | 0.0386248  | 0.498044 | 1.50196 |
| Atco_P9_P14_4_1_1-3_3_5  | 0.0386147  | 0.0386313  | 0.398961 | 1.60104 |
| Atco_P10_P15_3_2_2-4_3_5 | 0.0386829  | 0.0387208  | 0.327525 | 1.67248 |
| Atco_P13_P14_3_3_4-5_3_3 | 0.0387277  | 0.0387367  | 0.252241 | 1.74776 |
| Atco_P11_P13_2_2_4-5_3_2 | 0.0387857  | 0.0387841  | 0.320573 | 1.67943 |
| Atco_P12_P15_4_2_3-4_4_4 | 0.0388631  | 0.0389251  | 0.299789 | 1.70021 |
| Atco_P15_P16_4_4_4-5_3_5 | 0.0389251  | 0.038956   | 0.277255 | 1.72275 |



| name                     | $\Delta_l$ | $\Delta_a$ | $c_l$    | $c_a$   |
|--------------------------|------------|------------|----------|---------|
| Atco_P10_P11_3_2_2-3_1_4 | 0.0390953  | 0.0391115  | 0.423386 | 1.57661 |
| Atco_P13_P16_5_2_3-5_4_4 | 0.0391417  | 0.0391726  | 0.279617 | 1.72038 |
| Atco_P9_P13_2_2_2-5_2_3  | 0.0392451  | 0.0392699  | 0.28408  | 1.71592 |
| Atco_P14_P15_5_4_2-5_2_5 | 0.0393276  | 0.0393186  | 0.270372 | 1.72963 |
| Atco_P12_P15_3_2_4-5_4_3 | 0.0394963  | 0.0395912  | 0.258955 | 1.74105 |
| Atco_P10_P15_3_2_2-5_3_4 | 0.0395491  | 0.0396357  | 0.261289 | 1.73871 |
| Atco_P14_P14_4_3_4-4_3_4 | 0.0395818  | 0.039638   | 0.318869 | 1.68113 |
| Atco_P14_P15_5_2_4-5_2_5 | 0.039671   | 0.0396798  | 0.22546  | 1.77454 |
| Atco_P12_P16_4_3_2-5_3_5 | 0.0396444  | 0.0396911  | 0.246798 | 1.7532  |
| Atco_P12_P15_4_1_4-5_3_4 | 0.0396379  | 0.0397042  | 0.186525 | 1.81347 |
| Atco_P15_P16_5_2_5-5_3_5 | 0.0398137  | 0.0397944  | 0.254137 | 1.74586 |
| Atco_P11_P11_2_2_4-4_2_2 | 0.039868   | 0.0398703  | 0.409331 | 1.59067 |
| Atco_P12_P14_5_2_2-4_2_5 | 0.0399974  | 0.04       | 0.345189 | 1.65481 |
| Atco_P12_P15_3_2_4-5_3_4 | 0.0399891  | 0.0400684  | 0.291257 | 1.70874 |
| Atco_P15_P16_4_3_5-5_4_4 | 0.0401011  | 0.0401166  | 0.218776 | 1.78122 |
| Atco_P17_P18_5_4_5-5_5_5 | 0.0401997  | 0.040248   | 0.246066 | 1.75393 |
| Atco_P14_P14_3_3_5-5_3_3 | 0.0404112  | 0.0404369  | 0.286853 | 1.71315 |
| Atco_P10_P14_3_2_2-4_3_4 | 0.0404376  | 0.0404192  | 0.33786  | 1.66214 |
| Atco_P9_P10_2_1_3-4_2_1  | 0.0403922  | 0.0404377  | 0.538814 | 1.46119 |
| Atco_P10_P14_2_2_3-5_2_4 | 0.040481   | 0.0404216  | 0.520887 | 1.47911 |
| Atco_P8_P12_3_1_1-2_2_5  | 0.040528   | 0.0405236  | 0.428264 | 1.57174 |
| Atco_P14_P15_4_2_5-5_3_4 | 0.040541   | 0.0405208  | 0.293232 | 1.70677 |
| Atco_P9_P12_4_1_1-2_3_4  | 0.0405401  | 0.0405624  | 0.37617  | 1.62383 |
| Atco_P12_P14_4_1_4-4_3_4 | 0.0405658  | 0.0405653  | 0.360766 | 1.63923 |
| Atco_P13_P14_3_2_5-5_4_2 | 0.0406597  | 0.0406546  | 0.297743 | 1.70226 |
| Atco_P14_P17_4_3_4-5_4_5 | 0.0407039  | 0.0406881  | 0.203837 | 1.79616 |
| Atco_P15_P17_5_3_4-5_5_4 | 0.0407094  | 0.040713   | 0.233937 | 1.76606 |
| Atco_P13_P15_5_3_2-5_2_5 | 0.0407362  | 0.0407636  | 0.322706 | 1.67729 |
| Atco_P12_P13_4_2_3-5_2_3 | 0.0408001  | 0.0407736  | 0.438527 | 1.56147 |
| Atco_P10_P14_3_1_3-4_3_4 | 0.0408537  | 0.0408898  | 0.469829 | 1.53017 |
| Atco_P11_P14_3_3_2-5_2_4 | 0.0408065  | 0.0409061  | 0.238226 | 1.76177 |
| Atco_P10_P13_2_2_3-4_2_4 | 0.0409366  | 0.0410487  | 0.38019  | 1.61981 |
| Atco_P11_P13_3_2_3-4_3_3 | 0.0410406  | 0.0410956  | 0.399371 | 1.60063 |
| Atco_P9_P12_3_1_2-3_2_4  | 0.0411103  | 0.0410995  | 0.279387 | 1.72061 |
| Atco_P13_P14_4_4_2-4_2_5 | 0.0412165  | 0.04123    | 0.334178 | 1.66582 |
| Atco_P10_P11_4_1_2-2_2_4 | 0.0412276  | 0.0412676  | 0.369947 | 1.63005 |
| Atco_P10_P14_4_2_1-3_3_5 | 0.0414124  | 0.0414589  | 0.287791 | 1.71221 |
| Atco_P9_P12_2_2_2-4_2_3  | 0.0414689  | 0.0415174  | 0.334697 | 1.6653  |
| Atco_P12_P13_3_3_3-4_2_4 | 0.0415356  | 0.0415121  | 0.284567 | 1.71543 |

| name                     | $\Delta_l$ | $\Delta_a$ | $c_l$    | $c_a$   |
|--------------------------|------------|------------|----------|---------|
| Atco_P14_P14_5_3_3-5_3_3 | 0.0415322  | 0.0415709  | 0.237699 | 1.7623  |
| Atco_P10_P12_2_2_3-4_2_3 | 0.0416028  | 0.0415844  | 0.334797 | 1.6652  |
| Atco_P14_P14_3_4_4-5_2_4 | 0.0416235  | 0.0416096  | 0.26151  | 1.73849 |
| Atco_P14_P16_5_2_4-4_5_4 | 0.0416011  | 0.0416381  | 0.260558 | 1.73944 |
| Atco_P7_P11_2_1_1-3_2_3  | 0.041525   | 0.0416635  | 0.345457 | 1.65454 |
| Atco_P11_P17_4_2_2-5_4_5 | 0.0417041  | 0.0417035  | 0.224825 | 1.77517 |
| Atco_P10_P12_4_1_2-3_3_3 | 0.0416719  | 0.0417288  | 0.396878 | 1.60312 |
| Atco_P10_P17_3_2_2-5_4_5 | 0.0417883  | 0.0417225  | 0.343122 | 1.65688 |
| Atco_P11_P13_4_3_1-3_2_5 | 0.0418996  | 0.0419657  | 0.30977  | 1.69023 |
| Atco_P13_P17_4_2_4-5_5_4 | 0.0419904  | 0.041982   | 0.259696 | 1.7403  |
| Atco_P12_P13_4_2_3-3_3_4 | 0.0419104  | 0.0420065  | 0.29131  | 1.70869 |
| Atco_P12_P13_4_3_2-3_2_5 | 0.0420493  | 0.0419495  | 0.335868 | 1.66413 |
| Atco_P14_P17_4_2_5-5_5_4 | 0.0420392  | 0.0421213  | 0.24863  | 1.75137 |
| Atco_P11_P15_3_2_3-5_2_5 | 0.0421062  | 0.0421279  | 0.243404 | 1.7566  |
| Atco_P9_P15_3_2_1-4_3_5  | 0.04209    | 0.0421298  | 0.316061 | 1.68394 |
| Atco_P10_P11_3_2_2-4_1_3 | 0.042256   | 0.0422561  | 0.436669 | 1.56333 |
| Atco_P10_P12_4_1_2-3_2_4 | 0.0423374  | 0.0423509  | 0.285854 | 1.71415 |
| Atco_P10_P14_4_1_2-4_3_4 | 0.0423574  | 0.0423779  | 0.513761 | 1.48624 |
| Atco_P12_P14_3_2_4-5_2_4 | 0.0424519  | 0.0424342  | 0.51107  | 1.48893 |
| Atco_P10_P14_2_2_3-5_3_3 | 0.0423103  | 0.0425261  | 0.315068 | 1.68493 |
| Atco_P12_P13_3_2_4-4_3_3 | 0.0426364  | 0.0426416  | 0.305802 | 1.6942  |
| Atco_P8_P16_2_1_2-5_3_5  | 0.042636   | 0.0426914  | 0.518322 | 1.48168 |
| Atco_P11_P12_4_2_2-4_2_3 | 0.0426753  | 0.0427     | 0.400307 | 1.59969 |
| Atco_P9_P13_3_1_2-4_2_4  | 0.0427004  | 0.0427439  | 0.303952 | 1.69605 |
| Atco_P9_P10_2_2_2-3_1_3  | 0.0426194  | 0.0427831  | 0.466611 | 1.53339 |
| Atco_P13_P16_5_3_2-5_3_5 | 0.0427753  | 0.0427962  | 0.220022 | 1.77998 |
| Atco_P10_P10_3_2_2-3_2_2 | 0.0427593  | 0.0428126  | 0.342889 | 1.65711 |
| Atco_P12_P16_3_3_3-5_3_5 | 0.0427998  | 0.0428396  | 0.232467 | 1.76753 |
| Atco_P12_P12_3_3_3-4_2_3 | 0.0428361  | 0.0428502  | 0.325385 | 1.67461 |
| Atco_P10_P11_3_1_3-3_2_3 | 0.0428144  | 0.0428537  | 0.448839 | 1.55116 |
| Atco_P14_P14_4_2_5-4_4_3 | 0.0428357  | 0.0428555  | 0.268674 | 1.73133 |
| Atco_P10_P12_2_1_4-5_2_2 | 0.0430386  | 0.0430414  | 0.29097  | 1.70903 |
| Atco_P10_P11_3_1_3-4_2_2 | 0.0430929  | 0.0430824  | 0.390884 | 1.60912 |
| Atco_P6_P13_1_1_1-5_2_3  | 0.04315    | 0.04316    | 0.365662 | 1.63434 |
| Atco_P15_P16_5_3_4-4_4_5 | 0.0431616  | 0.0432166  | 0.215311 | 1.78469 |
| Atco_P8_P12_3_1_1-2_3_4  | 0.0433633  | 0.0433671  | 0.3987   | 1.6013  |
| Atco_P13_P17_5_3_2-5_4_5 | 0.0432759  | 0.0433945  | 0.232347 | 1.76765 |
| Atco_P11_P13_3_3_2-4_2_4 | 0.0433958  | 0.0433954  | 0.363548 | 1.63645 |
| Atco_P13_P17_4_3_3-5_4_5 | 0.0434334  | 0.043427   | 0.256764 | 1.74324 |

| name                     | $\Delta_l$ | $\Delta_a$ | $c_l$    | $c_a$   |
|--------------------------|------------|------------|----------|---------|
| Atco_P8_P12_1_1_3-5_2_2  | 0.0434498  | 0.0434574  | 0.460934 | 1.53907 |
| Atco_P9_P10_2_2_2-4_1_2  | 0.0435712  | 0.0435958  | 0.43611  | 1.56389 |
| Atco_P14_P16_4_4_3-5_3_5 | 0.043519   | 0.0436042  | 0.282901 | 1.7171  |
| Atco_P9_P11_4_1_1-1_3_4  | 0.0436743  | 0.0437018  | 0.340147 | 1.65985 |
| Atco_P12_P13_2_2_5-5_3_2 | 0.0436318  | 0.043769   | 0.375361 | 1.62464 |
| Atco_P9_P15_3_2_1-5_2_5  | 0.0436886  | 0.0437873  | 0.27193  | 1.72807 |
| Atco_P13_P13_3_2_5-5_2_3 | 0.0439162  | 0.0439601  | 0.361931 | 1.63807 |
| Atco_P9_P13_2_1_3-5_2_3  | 0.0442132  | 0.0441937  | 0.318296 | 1.6817  |
| Atco_P13_P16_5_2_3-4_5_4 | 0.0441692  | 0.0442373  | 0.246808 | 1.75319 |
| Atco_P6_P12_1_1_1-4_1_4  | 0.0442549  | 0.0442426  | 0.497071 | 1.50293 |
| Atco_P13_P14_5_2_3-5_2_4 | 0.0442549  | 0.0442403  | 0.387795 | 1.61221 |
| Atco_P13_P13_4_3_3-5_2_3 | 0.0441858  | 0.0443029  | 0.321139 | 1.67886 |
| Atco_P10_P11_2_2_3-4_1_3 | 0.0444294  | 0.0444549  | 0.42351  | 1.57649 |
| Atco_P15_P15_5_2_5-5_2_5 | 0.0445274  | 0.0445609  | 0.170438 | 1.82956 |
| Atco_P8_P13_3_1_1-3_3_4  | 0.0448546  | 0.0449323  | 0.354871 | 1.64513 |
| Atco_P12_P14_4_2_3-5_3_3 | 0.044883   | 0.044939   | 0.313314 | 1.68669 |
| Atco_P10_P15_2_2_3-5_3_4 | 0.0449248  | 0.0449448  | 0.498882 | 1.50112 |
| Atco_P9_P12_3_2_1-3_2_4  | 0.0450643  | 0.0450763  | 0.265412 | 1.73459 |
| Atco_P11_P13_3_1_4-4_3_3 | 0.0449548  | 0.0450955  | 0.447125 | 1.55288 |
| Atco_P16_P17_4_4_5-5_4_5 | 0.0452663  | 0.0452631  | 0.261013 | 1.73899 |
| Atco_P8_P11_2_1_2-3_2_3  | 0.0453061  | 0.0452599  | 0.473719 | 1.52628 |
| Atco_P7_P14_2_1_1-4_3_4  | 0.0452544  | 0.0453228  | 0.332781 | 1.66722 |
| Atco_P12_P16_3_2_4-5_4_4 | 0.0454204  | 0.045429   | 0.281469 | 1.71853 |
| Atco_P11_P14_3_2_3-4_2_5 | 0.0455355  | 0.0455446  | 0.430241 | 1.56976 |
| Atco_P16_P17_5_3_5-5_5_4 | 0.0455001  | 0.0455968  | 0.21485  | 1.78515 |
| Atco_P8_P10_2_2_1-3_1_3  | 0.045651   | 0.0456939  | 0.299687 | 1.70031 |
| Atco_P13_P17_5_2_3-5_5_4 | 0.0457307  | 0.0457297  | 0.269153 | 1.73085 |
| Atco_P11_P16_3_2_3-5_4_4 | 0.0457978  | 0.0457981  | 0.345495 | 1.65451 |
| Atco_P8_P14_3_1_1-4_2_5  | 0.0458127  | 0.0457767  | 0.508092 | 1.49191 |
| Atco_P11_P13_2_3_3-5_2_3 | 0.0458926  | 0.0458949  | 0.281206 | 1.71879 |
| Atco_P11_P14_4_2_2-5_2_4 | 0.0460915  | 0.0460737  | 0.505589 | 1.49441 |
| Atco_P18_P18_5_5_5-5_5_5 | 0.0460704  | 0.0461436  | 0.246261 | 1.75374 |
| Atco_P12_P14_3_2_4-5_4_2 | 0.0461007  | 0.0461584  | 0.278363 | 1.72164 |
| Atco_P8_P14_2_1_2-4_3_4  | 0.0461543  | 0.046177   | 0.507232 | 1.49277 |
| Atco_P8_P10_1_2_2-4_1_2  | 0.0461283  | 0.0462182  | 0.32097  | 1.67903 |
| Atco_P11_P15_4_2_2-3_4_5 | 0.0462537  | 0.0462843  | 0.339428 | 1.66057 |
| Atco_P15_P18_5_3_4-5_5_5 | 0.0463032  | 0.0462635  | 0.279715 | 1.72029 |
| Atco_P6_P12_1_1_1-4_2_3  | 0.0462405  | 0.0463359  | 0.3872   | 1.6128  |
| Atco_P6_P15_1_1_1-5_2_5  | 0.0463136  | 0.046348   | 0.519897 | 1.4801  |

| name                     | $\Delta_l$ | $\Delta_a$ | $c_l$    | $c_a$   |
|--------------------------|------------|------------|----------|---------|
| Atco_P7_P9_2_1_1-3_1_2   | 0.0463134  | 0.046367   | 0.609965 | 1.39004 |
| Atco_P9_P16_3_2_1-5_3_5  | 0.0465671  | 0.0465747  | 0.365883 | 1.63412 |
| Atco_P6_P10_1_1_1-3_1_3  | 0.0467324  | 0.0467065  | 0.558282 | 1.44172 |
| Atco_P15_P16_5_2_5-4_4_5 | 0.0467074  | 0.0467668  | 0.312002 | 1.688   |
| Atco_P9_P15_2_2_2-5_3_4  | 0.0467328  | 0.0467768  | 0.329482 | 1.67052 |
| Atco_P11_P15_3_2_3-5_4_3 | 0.0467005  | 0.0468207  | 0.275105 | 1.7249  |
| Atco_P11_P15_4_1_3-4_3_5 | 0.0467845  | 0.0469025  | 0.213096 | 1.7869  |
| Atco_P10_P11_4_2_1-3_1_4 | 0.0469733  | 0.0469733  | 0.454897 | 1.5451  |
| Atco_P7_P13_2_1_1-3_2_5  | 0.0468932  | 0.0469777  | 0.39608  | 1.60392 |
| Atco_P8_P11_2_2_1-3_1_4  | 0.0469658  | 0.0470134  | 0.410334 | 1.58967 |
| Atco_P10_P13_4_1_2-2_3_5 | 0.0470701  | 0.0471217  | 0.436516 | 1.56348 |
| Atco_P13_P13_4_2_4-5_3_2 | 0.0471522  | 0.0472006  | 0.326526 | 1.67347 |
| Atco_P13_P14_4_3_3-4_3_4 | 0.04721    | 0.0472477  | 0.277634 | 1.72237 |
| Atco_P15_P17_5_2_5-4_5_5 | 0.0474036  | 0.0473692  | 0.28003  | 1.71997 |
| Atco_P12_P14_4_3_2-5_2_4 | 0.0474743  | 0.0474926  | 0.294629 | 1.70537 |
| Atco_P12_P15_3_3_3-5_3_4 | 0.0474449  | 0.0475137  | 0.26981  | 1.73019 |
| Atco_P12_P13_2_3_4-5_2_3 | 0.0474395  | 0.0475985  | 0.306916 | 1.69308 |
| Atco_P12_P17_5_2_2-5_4_5 | 0.047627   | 0.047635   | 0.288449 | 1.71155 |
| Atco_P15_P17_5_4_3-5_4_5 | 0.0476938  | 0.047743   | 0.224493 | 1.77551 |
| Atco_P8_P13_2_1_2-4_2_4  | 0.0476985  | 0.0477523  | 0.466222 | 1.53378 |
| Atco_P12_P14_4_2_3-4_4_3 | 0.0477021  | 0.0477606  | 0.275261 | 1.72474 |
| Atco_P9_P12_1_2_3-5_2_2  | 0.0479088  | 0.0479508  | 0.296922 | 1.70308 |
| Atco_P11_P13_2_2_4-5_2_3 | 0.0479421  | 0.0479938  | 0.388485 | 1.61152 |
| Atco_P9_P10_2_1_3-3_2_2  | 0.047992   | 0.0479984  | 0.500985 | 1.49901 |
| Atco_P9_P12_3_2_1-4_1_4  | 0.0480766  | 0.0480991  | 0.451117 | 1.54888 |
| Atco_P9_P9_3_1_2-3_1_2   | 0.0480869  | 0.0481039  | 0.460702 | 1.5393  |
| Atco_P13_P16_5_3_2-4_4_5 | 0.0481107  | 0.0481343  | 0.233966 | 1.76603 |
| Atco_P14_P15_4_2_5-5_2_5 | 0.0480692  | 0.0481394  | 0.295587 | 1.70441 |
| Atco_P15_P17_4_3_5-5_4_5 | 0.0481025  | 0.0481771  | 0.325937 | 1.67406 |
| Atco_P9_P10_3_1_2-3_2_2  | 0.0481778  | 0.0482501  | 0.48141  | 1.51859 |
| Atco_P9_P13_2_2_2-4_2_4  | 0.0482567  | 0.0482353  | 0.287938 | 1.71206 |
| Atco_P11_P16_3_3_2-5_3_5 | 0.0483397  | 0.0483824  | 0.364749 | 1.63525 |
| Atco_P15_P15_5_3_4-5_4_3 | 0.0484326  | 0.04848    | 0.262818 | 1.73718 |
| Atco_P13_P13_3_3_4-5_3_2 | 0.0486051  | 0.0486105  | 0.280021 | 1.71998 |
| Atco_P11_P17_3_2_3-5_4_5 | 0.0485899  | 0.0486779  | 0.29826  | 1.70174 |
| Atco_P10_P14_4_2_1-4_2_5 | 0.048687   | 0.0487041  | 0.305822 | 1.69418 |
| Atco_P9_P13_3_1_2-4_3_3  | 0.0486801  | 0.0487148  | 0.51496  | 1.48504 |
| Atco_P8_P12_2_1_2-3_3_3  | 0.0487522  | 0.0487271  | 0.381989 | 1.61801 |
| Atco_P13_P15_3_4_3-5_2_5 | 0.048882   | 0.0489021  | 0.258492 | 1.74151 |

| name                     | $\Delta_l$ | $\Delta_a$ | $c_l$    | $c_a$   |
|--------------------------|------------|------------|----------|---------|
| Atco_P12_P14_5_2_2-2_4_5 | 0.0488496  | 0.0489152  | 0.300737 | 1.69926 |
| Atco_P13_P14_3_3_4-4_3_4 | 0.0489338  | 0.0489419  | 0.303928 | 1.69607 |
| Atco_P14_P15_5_4_2-4_3_5 | 0.0489464  | 0.0489235  | 0.238945 | 1.76105 |
| Atco_P11_P14_3_3_2-4_2_5 | 0.0490444  | 0.0490681  | 0.295228 | 1.70477 |
| Atco_P8_P8_1_1_3-3_1_1   | 0.0490974  | 0.0491375  | 0.544279 | 1.45572 |
| Atco_P16_P16_4_4_5-5_3_5 | 0.0492072  | 0.0492255  | 0.231648 | 1.76835 |
| Atco_P12_P15_4_2_3-5_4_3 | 0.0493248  | 0.049328   | 0.36636  | 1.63364 |
| Atco_P11_P15_4_2_2-5_2_5 | 0.0409811  | 0.0493563  | 0.467735 | 1.53226 |
| Atco_P7_P9_1_1_2-4_1_1   | 0.0493891  | 0.0493628  | 0.49254  | 1.50746 |
| Atco_P14_P18_4_3_4-5_5_5 | 0.049397   | 0.0494631  | 0.242142 | 1.75786 |
| Atco_P13_P14_4_3_3-5_3_3 | 0.0479674  | 0.0494733  | 0.346152 | 1.65385 |
| Atco_P16_P16_5_3_5-5_5_3 | 0.049387   | 0.0494933  | 0.214495 | 1.7855  |
| Atco_P10_P11_2_1_4-4_2_2 | 0.0494645  | 0.0495272  | 0.537032 | 1.46297 |
| Atco_P14_P15_5_3_3-4_4_4 | 0.0496686  | 0.0496484  | 0.238276 | 1.76172 |
| Atco_P14_P16_5_3_3-5_4_4 | 0.0495322  | 0.0496884  | 0.272277 | 1.72772 |
| Atco_P14_P14_4_2_5-5_2_4 | 0.0499449  | 0.0500246  | 0.340449 | 1.65955 |
| Atco_P9_P14_3_1_2-3_3_5  | 0.0500378  | 0.0500399  | 0.442018 | 1.55798 |
| Atco_P11_P12_4_1_3-4_2_3 | 0.0500501  | 0.0500325  | 0.40364  | 1.59636 |
| Atco_P12_P17_4_2_3-4_5_5 | 0.0500092  | 0.0500913  | 0.254265 | 1.74574 |
| Atco_P11_P13_4_1_3-4_2_4 | 0.0501041  | 0.0501839  | 0.239449 | 1.76055 |
| Atco_P10_P13_4_2_1-2_3_5 | 0.0503259  | 0.0503216  | 0.347852 | 1.65215 |
| Atco_P13_P14_5_2_3-4_4_3 | 0.0503331  | 0.0503818  | 0.25279  | 1.74721 |
| Atco_P12_P15_3_2_4-5_2_5 | 0.0504234  | 0.0503892  | 0.306086 | 1.69391 |
| Atco_P13_P13_3_4_3-5_2_3 | 0.050457   | 0.0505742  | 0.298684 | 1.70132 |
| Atco_P12_P14_3_3_3-5_3_3 | 0.0505797  | 0.050604   | 0.282734 | 1.71727 |
| Atco_P9_P10_1_2_3-4_1_2  | 0.0505293  | 0.0506212  | 0.48541  | 1.51459 |
| Atco_P16_P17_5_4_4-5_5_4 | 0.0505324  | 0.0506305  | 0.242159 | 1.75784 |
| Atco_P12_P14_4_3_2-4_3_4 | 0.0506185  | 0.0506602  | 0.301023 | 1.69898 |
| Atco_P14_P15_4_3_4-5_4_3 | 0.0508452  | 0.0507617  | 0.243339 | 1.75666 |
| Atco_P14_P16_3_3_5-5_3_5 | 0.0510425  | 0.0510945  | 0.304353 | 1.69565 |
| Atco_P13_P13_5_2_3-5_2_3 | 0.0511264  | 0.0510593  | 0.412969 | 1.58703 |
| Atco_P12_P13_4_1_4-5_3_2 | 0.0511331  | 0.0511191  | 0.39887  | 1.60113 |
| Atco_P10_P13_2_2_3-5_3_2 | 0.0511192  | 0.0511795  | 0.318334 | 1.68167 |
| Atco_P10_P15_2_2_3-5_2_5 | 0.0511801  | 0.0512075  | 0.283329 | 1.71667 |
| Atco_P14_P18_5_3_3-5_5_5 | 0.0511905  | 0.0512312  | 0.205444 | 1.79456 |
| Atco_P12_P12_4_1_4-4_2_3 | 0.051174   | 0.0512647  | 0.205314 | 1.79469 |
| Atco_P14_P17_4_2_5-5_4_5 | 0.0513613  | 0.0514016  | 0.324515 | 1.67548 |
| Atco_P9_P16_2_2_2-5_3_5  | 0.0514268  | 0.0514586  | 0.286042 | 1.71396 |
| Atco_P12_P15_4_3_2-5_3_4 | 0.051441   | 0.0515221  | 0.250723 | 1.74928 |

| name                     | $\Delta_l$ | $\Delta_a$ | $c_l$    | $c_a$   |
|--------------------------|------------|------------|----------|---------|
| Atco_P9_P11_2_1_3-4_3_1  | 0.0516238  | 0.0515914  | 0.290293 | 1.70971 |
| Atco_P11_P14_4_3_1-4_2_5 | 0.0515314  | 0.0517534  | 0.230345 | 1.76966 |
| Atco_P8_P13_1_1_3-5_3_2  | 0.051809   | 0.0518151  | 0.434758 | 1.56524 |
| Atco_P9_P10_3_2_1-3_1_3  | 0.0518966  | 0.0518587  | 0.478663 | 1.52134 |
| Atco_P7_P14_2_1_1-3_3_5  | 0.0519361  | 0.0519868  | 0.527813 | 1.47219 |
| Atco_P11_P16_4_1_3-5_3_5 | 0.0519125  | 0.0520645  | 0.24362  | 1.75638 |
| Atco_P16_P17_5_4_4-5_4_5 | 0.0521007  | 0.0521347  | 0.317934 | 1.68207 |
| Atco_P13_P15_3_3_4-4_3_5 | 0.0522022  | 0.0521767  | 0.297572 | 1.70243 |
| Atco_P13_P14_4_2_4-4_2_5 | 0.0524094  | 0.0524584  | 0.327366 | 1.67263 |
| Atco_P13_P15_4_2_4-4_3_5 | 0.0525734  | 0.052596   | 0.307623 | 1.69238 |
| Atco_P13_P15_5_2_3-5_2_5 | 0.0526397  | 0.0526774  | 0.427812 | 1.57219 |
| Atco_P9_P13_4_1_1-3_2_5  | 0.0526438  | 0.0527001  | 0.408975 | 1.59102 |
| Atco_P14_P14_3_3_5-5_2_4 | 0.0526699  | 0.0527181  | 0.347746 | 1.65225 |
| Atco_P16_P16_4_4_5-4_4_5 | 0.0527728  | 0.0528873  | 0.230766 | 1.76923 |
| Atco_P14_P17_5_2_4-5_4_5 | 0.0530002  | 0.0529941  | 0.375536 | 1.62446 |
| Atco_P10_P12_4_2_1-3_2_4 | 0.0530956  | 0.053115   | 0.356993 | 1.64301 |
| Atco_P15_P15_4_3_5-4_3_5 | 0.0531744  | 0.0531336  | 0.298987 | 1.70101 |
| Atco_P12_P17_4_3_2-5_4_5 | 0.0531034  | 0.0531774  | 0.298658 | 1.70134 |
| Atco_P7_P13_1_1_2-5_3_2  | 0.0531611  | 0.0532263  | 0.40738  | 1.59262 |
| Atco_P7_P13_2_1_1-3_3_4  | 0.0531872  | 0.05325    | 0.503394 | 1.49661 |
| Atco_P10_P13_3_1_3-5_3_2 | 0.0533249  | 0.0533155  | 0.428625 | 1.57137 |
| Atco_P14_P16_4_2_5-5_5_3 | 0.0533544  | 0.0349759  | 0.154882 | 1.84512 |
| Atco_P15_P17_4_4_4-5_4_5 | 0.053264   | 0.053357   | 0.241427 | 1.75857 |
| Atco_P13_P14_5_3_2-4_3_4 | 0.0533845  | 0.0534077  | 0.239656 | 1.76034 |
| Atco_P12_P16_4_1_4-5_3_5 | 0.0534142  | 0.0533126  | 0.292824 | 1.70718 |
| Atco_P14_P15_5_2_4-3_4_5 | 0.0533056  | 0.0534167  | 0.31927  | 1.68073 |
| Atco_P12_P15_3_4_2-5_2_5 | 0.0534228  | 0.0533979  | 0.354334 | 1.64567 |
| Atco_P15_P15_4_4_4-4_4_4 | 0.0533048  | 0.0534561  | 0.288403 | 1.7116  |
| Atco_P13_P14_4_2_4-5_4_2 | 0.0535934  | 0.0535746  | 0.264985 | 1.73502 |
| Atco_P14_P15_3_4_4-5_2_5 | 0.0536028  | 0.0535611  | 0.297046 | 1.70295 |
| Atco_P11_P14_2_2_4-5_3_3 | 0.0535748  | 0.0536168  | 0.323373 | 1.67663 |
| Atco_P13_P13_4_2_4-4_4_2 | 0.053387   | 0.0536288  | 0.240426 | 1.75957 |
| Atco_P14_P16_5_2_4-5_5_3 | 0.0536764  | 0.0438071  | 0.190546 | 1.80945 |
| Atco_P12_P14_5_2_2-4_3_4 | 0.0536817  | 0.0536501  | 0.328578 | 1.67142 |
| Atco_P15_P17_5_3_4-4_5_5 | 0.0536285  | 0.0537445  | 0.263178 | 1.73682 |
| Atco_P8_P12_2_1_2-4_3_2  | 0.0537508  | 0.0539206  | 0.315426 | 1.68457 |
| Atco_P14_P14_4_2_5-4_3_4 | 0.0538494  | 0.0539242  | 0.299638 | 1.70036 |
| Atco_P14_P17_4_3_4-5_5_4 | 0.0539956  | 0.0540271  | 0.264092 | 1.73591 |
| Atco_P13_P16_4_2_4-4_5_4 | 0.0539883  | 0.0540484  | 0.247838 | 1.75216 |

| name                     | $\Delta_l$ | $\Delta_a$ | $c_l$    | $c_a$   |
|--------------------------|------------|------------|----------|---------|
| Atco_P15_P17_4_3_5-5_5_4 | 0.0539711  | 0.054078   | 0.23976  | 1.76024 |
| Atco_P11_P12_3_2_3-3_2_4 | 0.0540978  | 0.0541436  | 0.355419 | 1.64458 |
| Atco_P13_P16_3_3_4-5_4_4 | 0.0542111  | 0.0542316  | 0.313844 | 1.68616 |
| Atco_P14_P18_4_2_5-5_5_5 | 0.0542567  | 0.0542336  | 0.273708 | 1.72629 |
| Atco_P10_P15_4_2_1-4_3_5 | 0.0543021  | 0.0542863  | 0.30082  | 1.69918 |
| Atco_P13_P15_3_3_4-5_2_5 | 0.0543074  | 0.0544536  | 0.308514 | 1.69149 |
| Atco_P10_P12_2_1_4-4_3_2 | 0.0546485  | 0.054592   | 0.403938 | 1.59606 |
| Atco_P14_P17_3_3_5-5_4_5 | 0.0546836  | 0.0546653  | 0.328623 | 1.67138 |
| Atco_P8_P14_2_2_1-4_2_5  | 0.0547128  | 0.0547088  | 0.381483 | 1.61852 |
| Atco_P6_P15_1_1_1-5_3_4  | 0.0547569  | 0.0547398  | 0.315391 | 1.68461 |
| Atco_P11_P12_3_2_3-4_1_4 | 0.0548682  | 0.0548428  | 0.300302 | 1.6997  |
| Atco_P13_P17_4_2_4-4_5_5 | 0.0547442  | 0.0548784  | 0.303479 | 1.69652 |
| Atco_P9_P13_3_2_1-4_2_4  | 0.0549397  | 0.0549167  | 0.237175 | 1.76283 |
| Atco_P8_P10_3_1_1-2_1_4  | 0.0549469  | 0.0549737  | 0.237133 | 1.76287 |
| Atco_P14_P15_3_3_5-5_3_4 | 0.0549832  | 0.0549996  | 0.272543 | 1.72746 |
| Atco_P14_P15_5_3_3-5_4_3 | 0.0550102  | 0.0549793  | 0.239111 | 1.76089 |
| Atco_P11_P14_2_3_3-5_2_4 | 0.0549611  | 0.0550808  | 0.258083 | 1.74192 |
| Atco_P9_P13_2_1_3-4_3_3  | 0.0551254  | 0.0551245  | 0.402532 | 1.59747 |
| Atco_P13_P16_4_3_3-5_4_4 | 0.0551294  | 0.0551349  | 0.228482 | 1.77152 |
| Atco_P12_P17_5_2_2-4_5_5 | 0.0551827  | 0.0552742  | 0.212775 | 1.78722 |
| Atco_P11_P15_4_2_2-5_3_4 | 0.0552064  | 0.0553295  | 0.536429 | 1.46357 |
| Atco_P8_P15_2_1_2-5_2_5  | 0.0553342  | 0.055313   | 0.304481 | 1.69552 |
| Atco_P6_P10_1_1_1-4_1_2  | 0.0553076  | 0.0553381  | 0.508218 | 1.49178 |
| Atco_P13_P13_3_3_4-4_2_4 | 0.0553275  | 0.0553586  | 0.311064 | 1.68894 |
| Atco_P11_P12_3_2_3-4_3_2 | 0.0553765  | 0.0554425  | 0.269778 | 1.73022 |
| Atco_P10_P13_3_2_2-5_2_3 | 0.0554555  | 0.0554902  | 0.401765 | 1.59823 |
| Atco_P14_P17_5_3_3-4_5_5 | 0.055471   | 0.0555185  | 0.235398 | 1.7646  |
| Atco_P8_P13_2_2_1-4_2_4  | 0.0555909  | 0.0556144  | 0.393162 | 1.60684 |
| Atco_P14_P15_4_3_4-4_4_4 | 0.055582   | 0.0556589  | 0.238177 | 1.76182 |
| Atco_P14_P16_5_4_2-5_3_5 | 0.0555792  | 0.0556844  | 0.169118 | 1.83088 |
| Atco_P13_P16_4_2_4-4_4_5 | 0.0556783  | 0.0557339  | 0.308279 | 1.69172 |
| Atco_P16_P17_5_3_5-4_5_5 | 0.0558743  | 0.0558795  | 0.253649 | 1.74635 |
| Atco_P15_P16_4_3_5-5_5_3 | 0.0558814  | 0.0558233  | 0.259984 | 1.74002 |
| Atco_P14_P15_5_3_3-3_4_5 | 0.0559213  | 0.0559556  | 0.259197 | 1.7408  |
| Atco_P8_P11_2_2_1-4_1_3  | 0.05598    | 0.0559859  | 0.427156 | 1.57284 |
| Atco_P14_P15_4_2_5-4_4_4 | 0.0560032  | 0.0560114  | 0.29325  | 1.70675 |
| Atco_P8_P9_2_1_2-2_2_2   | 0.0560759  | 0.0561256  | 0.474834 | 1.52517 |
| Atco_P11_P12_4_2_2-3_3_3 | 0.0561833  | 0.0561416  | 0.243392 | 1.75661 |
| Atco_P12_P14_5_2_2-3_4_4 | 0.0562897  | 0.0563533  | 0.258879 | 1.74112 |

| name                     | $\Delta_l$ | $\Delta_a$ | $c_l$    | $c_a$   |
|--------------------------|------------|------------|----------|---------|
| Atco_P8_P9_3_1_1-1_2_3   | 0.056543   | 0.0565279  | 0.481189 | 1.51881 |
| Atco_P10_P16_4_1_2-5_3_5 | 0.0566322  | 0.0566323  | 0.384069 | 1.61593 |
| Atco_P11_P14_4_1_3-3_3_5 | 0.056695   | 0.0567404  | 0.363737 | 1.63626 |
| Atco_P11_P14_3_2_3-5_2_4 | 0.0567399  | 0.0567506  | 0.287803 | 1.7122  |
| Atco_P13_P15_5_3_2-5_3_4 | 0.0569605  | 0.0569919  | 0.249522 | 1.75048 |
| Atco_P13_P15_5_3_2-3_4_5 | 0.0569971  | 0.057007   | 0.263362 | 1.73664 |
| Atco_P13_P16_4_3_3-4_4_5 | 0.0569792  | 0.0570425  | 0.251555 | 1.74844 |
| Atco_P11_P12_3_2_3-3_3_3 | 0.0570206  | 0.0570809  | 0.29028  | 1.70972 |
| Atco_P12_P14_4_2_3-3_3_5 | 0.0570637  | 0.0571082  | 0.365219 | 1.63478 |
| Atco_P9_P14_2_2_2-5_3_3  | 0.0570207  | 0.0571091  | 0.357321 | 1.64268 |
| Atco_P15_P16_5_4_3-4_4_5 | 0.0570001  | 0.0571325  | 0.241007 | 1.75899 |
| Atco_P12_P16_5_2_2-3_5_5 | 0.0571297  | 0.0572112  | 0.282463 | 1.71754 |
| Atco_P12_P13_5_2_2-4_2_4 | 0.0571732  | 0.0572616  | 0.432002 | 1.568   |
| Atco_P14_P16_3_3_5-5_4_4 | 0.0572664  | 0.0572386  | 0.218776 | 1.78122 |
| Atco_P8_P10_2_1_2-3_1_3  | 0.0573295  | 0.0573984  | 0.286034 | 1.71397 |
| Atco_P16_P16_4_4_5-5_4_4 | 0.0574638  | 0.0574503  | 0.23874  | 1.76126 |
| Atco_P11_P15_4_2_2-4_4_4 | 0.05735    | 0.0574736  | 0.21901  | 1.78099 |
| Atco_P12_P17_3_2_4-5_4_5 | 0.0574606  | 0.0575491  | 0.309626 | 1.69037 |
| Atco_P11_P12_2_3_3-5_2_2 | 0.0574831  | 0.0575611  | 0.36824  | 1.63176 |
| Atco_P9_P14_3_2_1-3_3_5  | 0.0575885  | 0.0576263  | 0.388933 | 1.61107 |
| Atco_P12_P14_4_3_2-3_3_5 | 0.0574983  | 0.0576486  | 0.343682 | 1.65632 |
| Atco_P11_P15_3_2_3-4_3_5 | 0.0576218  | 0.0576597  | 0.325002 | 1.675   |
| Atco_P9_P11_3_1_2-2_3_3  | 0.0577058  | 0.0577557  | 0.349946 | 1.65005 |
| Atco_P7_P10_2_1_1-2_2_3  | 0.057784   | 0.0577856  | 0.542852 | 1.45715 |
| Atco_P12_P14_4_2_3-3_4_4 | 0.0576867  | 0.0578176  | 0.299699 | 1.7003  |
| Atco_P14_P15_4_4_3-4_3_5 | 0.0578344  | 0.0578224  | 0.267295 | 1.7327  |
| Atco_P10_P14_3_3_1-4_2_5 | 0.05784    | 0.0578246  | 0.378572 | 1.62143 |
| Atco_P10_P14_2_3_2-5_2_4 | 0.0578849  | 0.0578963  | 0.343731 | 1.65627 |
| Atco_P9_P12_2_1_3-4_2_3  | 0.0578187  | 0.0578984  | 0.480412 | 1.51959 |
| Atco_P11_P18_3_2_3-5_5_5 | 0.0578805  | 0.0579263  | 0.271014 | 1.72899 |
| Atco_P10_P16_3_2_2-4_4_5 | 0.0579834  | 0.0580033  | 0.380163 | 1.61984 |
| Atco_P12_P18_5_2_2-5_5_5 | 0.0580331  | 0.0579722  | 0.221534 | 1.77847 |
| Atco_P13_P16_4_4_2-5_3_5 | 0.0580591  | 0.0581175  | 0.294547 | 1.70545 |
| Atco_P9_P12_3_1_2-4_2_3  | 0.0581215  | 0.0581375  | 0.53198  | 1.46802 |
| Atco_P11_P13_4_2_2-5_2_3 | 0.0581386  | 0.0581021  | 0.396358 | 1.60364 |
| Atco_P8_P11_1_2_2-4_1_3  | 0.0581435  | 0.0581524  | 0.453549 | 1.54645 |
| Atco_P10_P16_3_2_2-5_4_4 | 0.0580739  | 0.0581743  | 0.260128 | 1.73987 |
| Atco_P11_P18_4_2_2-5_5_5 | 0.0582659  | 0.0582684  | 0.206535 | 1.79346 |
| Atco_P13_P13_2_3_5-5_3_2 | 0.0582924  | 0.0582563  | 0.335731 | 1.66427 |



| name                     | $\Delta_l$ | $\Delta_a$ | $c_l$    | $c_a$   |
|--------------------------|------------|------------|----------|---------|
| Atco_P9_P15_2_1_3-5_3_4  | 0.0582795  | 0.058343   | 0.427996 | 1.572   |
| Atco_P11_P12_3_2_3-5_2_2 | 0.058244   | 0.0583664  | 0.435929 | 1.56407 |
| Atco_P15_P15_4_3_5-4_4_4 | 0.058066   | 0.0585199  | 0.237885 | 1.76212 |
| Atco_P12_P14_3_3_3-4_2_5 | 0.0584853  | 0.0585811  | 0.321237 | 1.67876 |
| Atco_P14_P15_3_3_5-5_4_3 | 0.0585499  | 0.0586701  | 0.261421 | 1.73858 |
| Atco_P12_P14_3_2_4-4_2_5 | 0.0587743  | 0.0587549  | 0.378001 | 1.622   |
| Atco_P12_P17_3_3_3-5_4_5 | 0.0586909  | 0.0588103  | 0.275493 | 1.72451 |
| Atco_P15_P15_4_3_5-5_2_5 | 0.0588404  | 0.0588653  | 0.281556 | 1.71844 |
| Atco_P15_P18_4_3_5-5_5_5 | 0.0591226  | 0.0591562  | 0.236835 | 1.76316 |
| Atco_P7_P15_2_1_1-5_3_4  | 0.0590731  | 0.0591567  | 0.500532 | 1.49947 |
| Atco_P11_P15_3_3_2-5_3_4 | 0.0590377  | 0.0591661  | 0.339287 | 1.66071 |
| Atco_P11_P12_4_2_2-2_3_4 | 0.0592174  | 0.059231   | 0.338875 | 1.66112 |
| Atco_P9_P10_1_1_4-4_2_1  | 0.0592493  | 0.059317   | 0.407533 | 1.59247 |
| Atco_P12_P16_3_2_4-5_5_3 | 0.0593181  | 0.0593354  | 0.275379 | 1.72462 |
| Atco_P13_P13_3_2_5-4_3_3 | 0.0592961  | 0.0593561  | 0.352652 | 1.64735 |
| Atco_P11_P12_4_1_3-3_2_4 | 0.0593115  | 0.0593575  | 0.241766 | 1.75823 |
| Atco_P7_P10_1_1_2-4_2_1  | 0.0593767  | 0.0593166  | 0.486317 | 1.51368 |
| Atco_P10_P12_1_2_4-5_2_2 | 0.0593652  | 0.0593768  | 0.383131 | 1.61687 |
| Atco_P11_P12_4_2_2-4_1_4 | 0.0594245  | 0.0594294  | 0.329395 | 1.67061 |
| Atco_P14_P14_3_3_5-5_4_2 | 0.0594801  | 0.0595084  | 0.302655 | 1.69735 |
| Atco_P9_P11_3_2_1-2_2_4  | 0.0595256  | 0.0595934  | 0.482577 | 1.51742 |
| Atco_P15_P15_5_4_3-5_4_3 | 0.0595329  | 0.0596014  | 0.223916 | 1.77608 |
| Atco_P10_P14_2_1_4-5_3_3 | 0.059502   | 0.0596573  | 0.465511 | 1.53449 |
| Atco_P9_P10_4_1_1-2_2_3  | 0.0596582  | 0.0596549  | 0.452855 | 1.54715 |
| Atco_P12_P15_5_2_2-4_4_4 | 0.0596661  | 0.0596917  | 0.254719 | 1.74528 |
| Atco_P13_P13_3_3_4-4_3_3 | 0.0596136  | 0.0597002  | 0.269753 | 1.73025 |
| Atco_P7_P14_1_1_2-5_3_3  | 0.0598007  | 0.0597966  | 0.385445 | 1.61455 |
| Atco_P16_P16_4_5_4-5_3_5 | 0.0598017  | 0.0598243  | 0.257723 | 1.74228 |
| Atco_P8_P14_2_2_1-5_2_4  | 0.059683   | 0.0598538  | 0.308362 | 1.69164 |
| Atco_P10_P11_2_2_3-3_2_3 | 0.059881   | 0.0598567  | 0.368414 | 1.63159 |
| Atco_P11_P15_3_1_4-5_3_4 | 0.0600556  | 0.0600862  | 0.409783 | 1.59022 |
| Atco_P11_P12_3_1_4-5_2_2 | 0.0599805  | 0.0600978  | 0.254267 | 1.74573 |
| Atco_P10_P11_3_2_2-4_2_2 | 0.0601627  | 0.0601465  | 0.403188 | 1.59681 |
| Atco_P11_P12_4_1_3-4_3_2 | 0.0601607  | 0.0601726  | 0.446972 | 1.55303 |
| Atco_P6_P13_1_1_1-4_2_4  | 0.0603897  | 0.0603777  | 0.517935 | 1.48207 |
| Atco_P14_P14_3_4_4-5_3_3 | 0.0602934  | 0.060429   | 0.280764 | 1.71924 |
| Atco_P12_P13_5_2_2-2_4_4 | 0.0605317  | 0.0603912  | 0.340247 | 1.65975 |
| Atco_P13_P17_3_3_4-5_4_5 | 0.0605072  | 0.0606012  | 0.331207 | 1.66879 |
| Atco_P12_P13_2_3_4-5_3_2 | 0.0605257  | 0.0606139  | 0.307719 | 1.69228 |

| name                     | $\Delta_l$ | $\Delta_a$ | $c_l$    | $c_a$   |
|--------------------------|------------|------------|----------|---------|
| Atco_P11_P15_2_2_4-5_3_4 | 0.0606178  | 0.0606609  | 0.493484 | 1.50652 |
| Atco_P13_P16_5_3_2-5_4_4 | 0.0604718  | 0.0606611  | 0.277452 | 1.72255 |
| Atco_P10_P16_3_1_3-5_3_5 | 0.0606328  | 0.0606621  | 0.345962 | 1.65404 |
| Atco_P11_P17_4_2_2-4_5_5 | 0.0606853  | 0.0606479  | 0.265987 | 1.73401 |
| Atco_P12_P16_4_3_2-4_4_5 | 0.0606766  | 0.0607512  | 0.293101 | 1.7069  |
| Atco_P9_P15_3_1_2-5_2_5  | 0.060845   | 0.060875   | 0.295514 | 1.70449 |
| Atco_P11_P17_3_2_3-5_5_4 | 0.060915   | 0.0609363  | 0.330284 | 1.66972 |
| Atco_P10_P16_2_2_3-5_3_5 | 0.060953   | 0.0609176  | 0.521787 | 1.47821 |
| Atco_P12_P14_3_2_4-4_4_3 | 0.0609331  | 0.0609675  | 0.283407 | 1.71659 |
| Atco_P12_P17_3_2_4-5_5_4 | 0.0610193  | 0.060978   | 0.303575 | 1.69642 |
| Atco_P10_P16_4_2_1-5_3_5 | 0.0611488  | 0.0610726  | 0.331131 | 1.66887 |
| Atco_P10_P13_4_1_2-3_2_5 | 0.0611542  | 0.0611617  | 0.214503 | 1.7855  |
| Atco_P10_P13_3_2_2-3_3_4 | 0.0612651  | 0.0612899  | 0.351168 | 1.64883 |
| Atco_P17_P17_5_5_4-5_5_4 | 0.0612947  | 0.0614406  | 0.266648 | 1.73335 |
| Atco_P14_P17_5_4_2-5_4_5 | 0.0614331  | 0.0614547  | 0.242153 | 1.75785 |
| Atco_P10_P15_3_3_1-5_2_5 | 0.0614208  | 0.0614812  | 0.22776  | 1.77224 |
| Atco_P13_P15_3_3_4-5_4_3 | 0.0614946  | 0.0614679  | 0.249467 | 1.75053 |
| Atco_P11_P12_3_3_2-4_2_3 | 0.0614948  | 0.0615179  | 0.285477 | 1.71452 |
| Atco_P9_P14_3_2_1-5_2_4  | 0.0614828  | 0.0615246  | 0.340831 | 1.65917 |
| Atco_P14_P14_5_2_4-5_4_2 | 0.0615369  | 0.0615072  | 0.287663 | 1.71234 |
| Atco_P7_P12_2_1_1-4_1_4  | 0.0615401  | 0.0615399  | 0.340743 | 1.65926 |
| Atco_P11_P13_4_2_2-2_3_5 | 0.061721   | 0.0616973  | 0.389218 | 1.61078 |
| Atco_P11_P14_4_1_3-5_3_3 | 0.0616244  | 0.0617347  | 0.369039 | 1.63096 |
| Atco_P8_P13_2_1_2-5_3_2  | 0.0617484  | 0.0617219  | 0.482284 | 1.51772 |
| Atco_P13_P14_4_3_3-4_4_3 | 0.0617766  | 0.0617679  | 0.291105 | 1.70889 |
| Atco_P11_P13_3_2_3-5_3_2 | 0.0617254  | 0.0617978  | 0.31901  | 1.68099 |
| Atco_P11_P13_3_1_4-5_2_3 | 0.0619374  | 0.0619863  | 0.235886 | 1.76411 |
| Atco_P13_P16_3_2_5-5_4_4 | 0.061987   | 0.0620472  | 0.277688 | 1.72231 |
| Atco_P13_P13_3_4_3-4_2_4 | 0.0621155  | 0.0620195  | 0.317937 | 1.68206 |
| Atco_P9_P10_3_1_2-3_1_3  | 0.0621166  | 0.0621225  | 0.30482  | 1.69518 |
| Atco_P12_P18_3_2_4-5_5_5 | 0.0621589  | 0.062158   | 0.349181 | 1.65082 |
| Atco_P10_P13_3_1_3-5_2_3 | 0.0620998  | 0.0621884  | 0.234998 | 1.765   |
| Atco_P13_P13_2_4_4-5_2_3 | 0.0620177  | 0.062194   | 0.241884 | 1.75812 |
| Atco_P13_P14_5_2_3-5_3_3 | 0.0620987  | 0.0622017  | 0.355196 | 1.6448  |
| Atco_P11_P12_4_3_1-2_2_5 | 0.0621513  | 0.0622701  | 0.42656  | 1.57344 |
| Atco_P13_P15_5_2_3-5_4_3 | 0.062225   | 0.0622756  | 0.294027 | 1.70597 |
| Atco_P12_P15_4_2_3-3_4_5 | 0.0623725  | 0.0623495  | 0.339591 | 1.66041 |
| Atco_P15_P16_4_5_3-5_3_5 | 0.0623199  | 0.0624246  | 0.285241 | 1.71476 |
| Atco_P11_P14_4_2_2-3_4_4 | 0.0624374  | 0.0624565  | 0.305213 | 1.69479 |

| name                     | $\Delta_l$ | $\Delta_a$ | $c_l$    | $c_a$   |
|--------------------------|------------|------------|----------|---------|
| Atco_P13_P13_2_3_5-5_2_3 | 0.0624124  | 0.0624682  | 0.356696 | 1.6433  |
| Atco_P13_P14_5_2_3-2_4_5 | 0.0624325  | 0.0624747  | 0.339841 | 1.66016 |
| Atco_P9_P13_4_1_1-3_3_4  | 0.0624924  | 0.062401   | 0.387991 | 1.61201 |
| Atco_P13_P14_4_2_4-3_4_4 | 0.0623961  | 0.0624989  | 0.288485 | 1.71151 |
| Atco_P11_P12_4_2_2-2_2_5 | 0.0624795  | 0.0625189  | 0.406401 | 1.5936  |
| Atco_P12_P15_3_3_3-4_3_5 | 0.0623194  | 0.0625225  | 0.31605  | 1.68395 |
| Atco_P9_P11_3_1_2-3_3_2  | 0.0625023  | 0.0625994  | 0.345998 | 1.654   |
| Atco_P15_P16_4_3_5-4_4_5 | 0.0623185  | 0.0626254  | 0.344026 | 1.65597 |
| Atco_P6_P16_1_1_1-5_3_5  | 0.0626348  | 0.062621   | 0.53517  | 1.46483 |
| Atco_P12_P14_3_4_2-5_2_4 | 0.0624707  | 0.0626413  | 0.301181 | 1.69882 |
| Atco_P12_P13_3_2_4-4_4_2 | 0.0626178  | 0.0626429  | 0.341345 | 1.65865 |
| Atco_P11_P12_4_1_3-2_3_4 | 0.0626739  | 0.0626384  | 0.454394 | 1.54561 |
| Atco_P12_P13_4_3_2-3_3_4 | 0.0627243  | 0.0627122  | 0.311011 | 1.68899 |
| Atco_P16_P18_5_4_4-5_5_5 | 0.0628167  | 0.0628607  | 0.300652 | 1.69935 |
| Atco_P7_P11_2_1_1-3_1_4  | 0.062804   | 0.062864   | 0.360551 | 1.63945 |
| Atco_P14_P14_4_2_5-4_2_5 | 0.0629799  | 0.0629951  | 0.42472  | 1.57528 |
| Atco_P9_P11_2_2_2-4_2_2  | 0.0629381  | 0.0630059  | 0.380061 | 1.61994 |
| Atco_P12_P12_3_3_3-5_2_2 | 0.0630411  | 0.0630317  | 0.301309 | 1.69869 |
| Atco_P10_P18_3_2_2-5_5_5 | 0.0631829  | 0.0631816  | 0.337072 | 1.66293 |
| Atco_P10_P10_2_2_3-3_2_2 | 0.0632392  | 0.0632746  | 0.336888 | 1.66311 |
| Atco_P10_P10_2_2_3-4_2_1 | 0.0632814  | 0.0632787  | 0.388353 | 1.61165 |
| Atco_P9_P10_2_1_3-4_1_2  | 0.0633037  | 0.0633941  | 0.28553  | 1.71447 |
| Atco_P12_P14_2_3_4-5_2_4 | 0.0634038  | 0.063447   | 0.310048 | 1.68995 |
| Atco_P10_P14_4_1_2-4_2_5 | 0.0525887  | 0.0634568  | 0.30903  | 1.69097 |
| Atco_P11_P11_3_1_4-3_3_2 | 0.0635107  | 0.0282378  | 0.165959 | 1.83404 |
| Atco_P11_P15_4_3_1-5_2_5 | 0.0635344  | 0.0635449  | 0.283585 | 1.71641 |
| Atco_P11_P16_4_2_2-5_4_4 | 0.0635212  | 0.0636072  | 0.232675 | 1.76733 |
| Atco_P13_P14_5_3_2-5_2_4 | 0.0635676  | 0.0636654  | 0.323307 | 1.67669 |
| Atco_P14_P15_3_4_4-5_3_4 | 0.0635379  | 0.0636768  | 0.27584  | 1.72416 |
| Atco_P15_P18_4_4_4-5_5_5 | 0.0637039  | 0.0637123  | 0.250632 | 1.74937 |
| Atco_P9_P12_3_2_1-2_2_5  | 0.0636291  | 0.0637345  | 0.482715 | 1.51728 |
| Atco_P11_P13_4_2_2-4_3_3 | 0.0636957  | 0.0637378  | 0.256564 | 1.74344 |
| Atco_P9_P14_3_1_2-4_2_5  | 0.0637462  | 0.0637345  | 0.202071 | 1.79793 |
| Atco_P7_P9_1_1_2-3_1_2   | 0.0640003  | 0.0639943  | 0.62107  | 1.37893 |
| Atco_P11_P14_2_2_4-5_2_4 | 0.0640032  | 0.0639869  | 0.515264 | 1.48474 |
| Atco_P8_P16_2_2_1-5_3_5  | 0.0641383  | 0.0641145  | 0.305357 | 1.69464 |
| Atco_P12_P14_3_3_3-4_3_4 | 0.0641697  | 0.0641457  | 0.296475 | 1.70352 |
| Atco_P15_P17_3_4_5-5_4_5 | 0.0641298  | 0.0641954  | 0.231825 | 1.76818 |
| Atco_P11_P14_3_2_3-4_4_3 | 0.0640744  | 0.0642328  | 0.30221  | 1.69779 |

| name                     | $\Delta_l$ | $\Delta_a$ | $c_l$     | $c_a$   |
|--------------------------|------------|------------|-----------|---------|
| Atco_P14_P16_4_3_4-4_4_5 | 0.0641584  | 0.0642988  | 0.274052  | 1.72595 |
| Atco_P7_P12_2_1_1-4_2_3  | 0.06431    | 0.064303   | 0.47524   | 1.52476 |
| Atco_P8_P14_3_1_1-4_3_4  | 0.064348   | 0.0643439  | 0.424359  | 1.57564 |
| Atco_P8_P11_2_1_2-4_1_3  | 0.0541727  | 0.0643793  | 0.40738   | 1.59262 |
| Atco_P13_P16_4_2_4-5_3_5 | 0.064303   | 0.0644087  | 0.283413  | 1.71659 |
| Atco_P13_P15_3_2_5-5_3_4 | 0.0643696  | 0.0644595  | 0.345244  | 1.65476 |
| Atco_P12_P14_2_3_4-5_3_3 | 0.064354   | 0.064485   | 0.244653  | 1.75535 |
| Atco_P9_P12_3_1_2-2_3_4  | 0.0644311  | 0.0645188  | 0.531963  | 1.46804 |
| Atco_P8_P10_2_1_2-4_1_2  | 0.0644956  | 0.0645224  | 0.499572  | 1.50043 |
| Atco_P12_P13_4_4_1-3_2_5 | 0.0644554  | 0.0645235  | 0.38822   | 1.61178 |
| Atco_P10_P13_3_2_2-3_2_5 | 0.0644806  | 0.064592   | 0.372992  | 1.62701 |
| Atco_P12_P13_4_1_4-3_3_4 | 0.0646072  | 0.0646741  | 0.391259  | 1.60874 |
| Atco_P11_P15_3_3_2-4_3_5 | 0.0647071  | 0.0647509  | 0.355457  | 1.64454 |
| Atco_P10_P13_2_2_3-4_3_3 | 0.0648206  | 0.0648714  | 0.414807  | 1.58519 |
| Atco_P13_P15_4_4_2-4_3_5 | 0.064747   | 0.0648982  | 0.326655  | 1.67335 |
| Atco_P8_P16_3_1_1-5_3_5  | 0.0651077  | 0.065098   | 0.399947  | 1.60005 |
| Atco_P13_P13_3_3_4-3_3_4 | 0.0650437  | 0.0651252  | 0.29107   | 1.70893 |
| Atco_P11_P16_4_2_2-3_5_5 | 0.0649654  | 0.0651382  | 0.318998  | 1.681   |
| Atco_P9_P14_3_2_1-4_3_4  | 0.0651215  | 0.0651434  | 0.39907   | 1.60093 |
| Atco_P12_P12_4_2_3-4_3_2 | 0.0651182  | 0.0652267  | 0.262175  | 1.73783 |
| Atco_P11_P11_2_2_4-4_3_1 | 0.0651309  | 0.0652726  | 0.395732  | 1.60427 |
| Atco_P14_P14_3_3_5-4_3_4 | 0.0652184  | 0.0652749  | 0.315177  | 1.68482 |
| Atco_P15_P16_5_5_2-5_3_5 | 0.0652854  | 0.0652232  | 0.200291  | 1.79971 |
| Atco_P10_P15_2_3_2-5_2_5 | 0.0651664  | 0.065352   | 0.288792  | 1.71121 |
| Atco_P8_P11_3_1_1-3_2_3  | 0.0653936  | 0.0653839  | 0.459982  | 1.54002 |
| Atco_P10_P10_1_2_4-4_2_1 | 0.0654055  | 0.0654613  | 0.463882  | 1.53612 |
| Atco_P12_P13_4_1_4-4_2_4 | 0.0654613  | 0.0654229  | 0.251259  | 1.74874 |
| Atco_P13_P15_5_3_2-4_4_4 | 0.0655235  | 0.0655209  | 0.233956  | 1.76604 |
| Atco_P12_P16_5_2_2-5_3_5 | 0.0656037  | 0.065619   | 0.441022  | 1.55898 |
| Atco_P8_P12_1_2_2-5_2_2  | 0.0656275  | 0.0656719  | 0.518215  | 1.48178 |
| Atco_P13_P16_5_2_3-5_5_3 | 0.0654441  | 0.0657122  | 0.258045  | 1.74196 |
| Atco_P14_P17_4_4_3-5_4_5 | 0.0657607  | 0.0657494  | 0.273677  | 1.72632 |
| Atco_P15_P16_5_2_5-5_5_3 | 0.0658018  | 0.0226743  | 0.0549541 | 1.94505 |
| Atco_P11_P14_4_3_1-3_3_5 | 0.0657985  | 0.065901   | 0.338223  | 1.66178 |
| Atco_P11_P12_4_3_1-3_2_4 | 0.0658214  | 0.0659037  | 0.24329   | 1.75671 |
| Atco_P13_P16_5_2_3-3_5_5 | 0.0659838  | 0.0442677  | 0.144544  | 1.85546 |
| Atco_P8_P11_3_1_1-3_1_4  | 0.0661856  | 0.0661813  | 0.411583  | 1.58842 |
| Atco_P10_P13_3_1_3-3_3_4 | 0.0663006  | 0.0662973  | 0.477383  | 1.52262 |
| Atco_P11_P11_2_3_3-4_2_2 | 0.0663152  | 0.0663146  | 0.371303  | 1.6287  |

| name                     | $\Delta_l$ | $\Delta_a$ | $c_l$    | $c_a$   |
|--------------------------|------------|------------|----------|---------|
| Atco_P11_P15_2_3_3-5_2_5 | 0.0664006  | 0.0663588  | 0.309934 | 1.69007 |
| Atco_P10_P12_4_2_1-2_3_4 | 0.066346   | 0.0665309  | 0.350364 | 1.64964 |
| Atco_P12_P14_4_3_2-5_3_3 | 0.0665541  | 0.0665505  | 0.238671 | 1.76133 |
| Atco_P14_P16_4_3_4-4_5_4 | 0.0665818  | 0.0665577  | 0.281528 | 1.71847 |
| Atco_P12_P16_3_2_4-5_3_5 | 0.0666275  | 0.066406   | 0.653455 | 1.34655 |
| Atco_P6_P14_1_1_1-5_3_3  | 0.066688   | 0.0666772  | 0.32468  | 1.67532 |
| Atco_P11_P13_3_3_2-5_2_3 | 0.0665984  | 0.0667007  | 0.239453 | 1.76055 |
| Atco_P10_P12_2_2_3-4_3_2 | 0.066757   | 0.0667102  | 0.353452 | 1.64655 |
| Atco_P13_P16_3_4_3-5_3_5 | 0.0663587  | 0.0668078  | 0.272427 | 1.72757 |
| Atco_P16_P18_4_4_5-5_5_5 | 0.0668281  | 0.0666895  | 0.215514 | 1.78449 |
| Atco_P9_P11_2_1_3-3_3_2  | 0.0669454  | 0.0669555  | 0.388979 | 1.61102 |
| Atco_P15_P15_4_4_4-5_3_4 | 0.0669084  | 0.0669895  | 0.356657 | 1.64334 |
| Atco_P13_P13_3_2_5-4_4_2 | 0.0668785  | 0.0669909  | 0.310231 | 1.68977 |
| Atco_P11_P12_3_1_4-4_2_3 | 0.0668815  | 0.0670163  | 0.33276  | 1.66724 |
| Atco_P15_P15_3_4_5-5_3_4 | 0.0669642  | 0.0670307  | 0.206186 | 1.79381 |
| Atco_P10_P12_4_1_2-2_2_5 | 0.0670637  | 0.0670451  | 0.386286 | 1.61371 |
| Atco_P7_P14_1_1_2-5_2_4  | 0.0671028  | 0.0671118  | 0.923234 | 1.07677 |
| Atco_P9_P10_4_1_1-2_1_4  | 0.0671421  | 0.0671654  | 0.325664 | 1.67434 |
| Atco_P12_P14_4_1_4-5_2_4 | 0.0670405  | 0.0672222  | 0.158101 | 1.8419  |
| Atco_P14_P16_3_4_4-5_3_5 | 0.0671656  | 0.0672949  | 0.237603 | 1.7624  |
| Atco_P16_P17_5_5_3-5_4_5 | 0.067178   | 0.0673164  | 0.218838 | 1.78116 |
| Atco_P10_P14_3_2_2-3_3_5 | 0.0672448  | 0.067321   | 0.339976 | 1.66002 |
| Atco_P10_P13_4_2_1-3_3_4 | 0.0672938  | 0.0673735  | 0.315089 | 1.68491 |
| Atco_P15_P18_5_4_3-5_5_5 | 0.0673775  | 0.0673933  | 0.207926 | 1.79207 |
| Atco_P9_P14_3_1_2-5_3_3  | 0.0671669  | 0.0674207  | 0.616595 | 1.3834  |
| Atco_P9_P14_2_2_2-4_3_4  | 0.067398   | 0.0674295  | 0.316889 | 1.68311 |
| Atco_P9_P9_2_1_3-3_1_2   | 0.0673278  | 0.0674564  | 0.392418 | 1.60758 |
| Atco_P10_P14_3_1_3-5_2_4 | 0.0662625  | 0.0675265  | 0.269153 | 1.73085 |
| Atco_P11_P14_2_2_4-5_4_2 | 0.0675431  | 0.0675369  | 0.316875 | 1.68312 |
| Atco_P15_P15_4_3_5-5_5_2 | 0.0674152  | 0.0675595  | 0.267595 | 1.73241 |
| Atco_P9_P10_1_2_3-4_2_1  | 0.0675169  | 0.0675619  | 0.408262 | 1.59174 |
| Atco_P13_P16_3_2_5-5_5_3 | 0.0676043  | 0.0605163  | 0.218776 | 1.78122 |
| Atco_P12_P13_4_2_3-3_2_5 | 0.0675301  | 0.0676513  | 0.426846 | 1.57315 |
| Atco_P12_P15_4_1_4-4_3_5 | 0.0676526  | 0.0676534  | 0.308997 | 1.691   |
| Atco_P9_P12_4_1_1-3_2_4  | 0.0676673  | 0.0676463  | 0.444899 | 1.5551  |
| Atco_P9_P13_1_2_3-5_2_3  | 0.0676897  | 0.0677589  | 0.298345 | 1.70165 |
| Atco_P9_P9_1_1_4-4_1_1   | 0.0676921  | 0.0678319  | 0.462198 | 1.5378  |
| Atco_P15_P16_4_4_4-4_4_5 | 0.0677879  | 0.067854   | 0.295327 | 1.70467 |
| Atco_P10_P13_2_3_2-5_2_3 | 0.0678658  | 0.0678508  | 0.345978 | 1.65402 |

| name                     | $\Delta_l$ | $\Delta_a$ | $c_l$    | $c_a$   |
|--------------------------|------------|------------|----------|---------|
| Atco_P11_P12_3_3_2-3_2_4 | 0.0678675  | 0.0678635  | 0.339486 | 1.66051 |
| Atco_P14_P16_5_4_2-4_4_5 | 0.0678094  | 0.0678694  | 0.260591 | 1.73941 |
| Atco_P13_P14_3_2_5-4_4_3 | 0.0678729  | 0.0678806  | 0.27289  | 1.72711 |
| Atco_P12_P16_5_2_2-5_4_4 | 0.0678813  | 0.0678974  | 0.279963 | 1.72004 |
| Atco_P11_P15_2_3_3-5_3_4 | 0.0678561  | 0.0679338  | 0.372628 | 1.62737 |
| Atco_P14_P15_3_3_5-4_3_5 | 0.0678562  | 0.067952   | 0.289461 | 1.71054 |
| Atco_P13_P17_3_2_5-5_5_4 | 0.0678783  | 0.0679677  | 0.255594 | 1.74441 |
| Atco_P12_P16_2_3_4-5_3_5 | 0.06792    | 0.0679854  | 0.254521 | 1.74548 |
| Atco_P12_P15_3_2_4-4_4_4 | 0.0681605  | 0.0681609  | 0.370065 | 1.62994 |
| Atco_P15_P15_3_4_5-5_2_5 | 0.0681212  | 0.0682131  | 0.307514 | 1.69249 |
| Atco_P10_P15_3_1_3-4_3_5 | 0.0682738  | 0.0682527  | 0.484127 | 1.51587 |
| Atco_P11_P15_4_3_1-4_3_5 | 0.0682401  | 0.0682748  | 0.202321 | 1.79768 |
| Atco_P10_P14_2_2_3-4_2_5 | 0.0682868  | 0.0682809  | 0.464133 | 1.53587 |
| Atco_P14_P16_5_3_3-3_5_5 | 0.0683395  | 0.0683245  | 0.265754 | 1.73425 |
| Atco_P7_P11_2_1_1-2_2_4  | 0.0681793  | 0.0683707  | 0.507184 | 1.49282 |
| Atco_P11_P12_3_1_4-3_3_3 | 0.0683369  | 0.0683753  | 0.444642 | 1.55536 |
| Atco_P14_P17_4_3_4-4_5_5 | 0.0683367  | 0.068406   | 0.281215 | 1.71879 |
| Atco_P9_P13_3_1_2-3_2_5  | 0.0684014  | 0.0685073  | 0.32582  | 1.67418 |
| Atco_P11_P16_3_2_3-4_5_4 | 0.0683666  | 0.0685404  | 0.313162 | 1.68684 |
| Atco_P10_P10_3_1_3-3_1_3 | 0.0682981  | 0.0685882  | 0.224628 | 1.77537 |
| Atco_P11_P14_2_3_3-5_3_3 | 0.0685069  | 0.0685887  | 0.385469 | 1.61453 |
| Atco_P11_P12_2_2_4-4_3_2 | 0.0686146  | 0.0685822  | 0.347734 | 1.65227 |
| Atco_P13_P17_4_3_3-5_5_4 | 0.0685743  | 0.0686261  | 0.286322 | 1.71368 |
| Atco_P12_P14_4_4_1-4_2_5 | 0.0685598  | 0.0686333  | 0.243591 | 1.75641 |
| Atco_P14_P16_5_3_3-5_5_3 | 0.0685876  | 0.0686537  | 0.233501 | 1.7665  |
| Atco_P15_P16_3_4_5-5_4_4 | 0.0686477  | 0.0687306  | 0.24248  | 1.75752 |
| Atco_P11_P17_3_3_2-5_4_5 | 0.0687363  | 0.0687871  | 0.357252 | 1.64275 |
| Atco_P13_P14_5_3_2-5_3_3 | 0.0687382  | 0.0688054  | 0.250458 | 1.74954 |
| Atco_P12_P12_3_2_4-3_2_4 | 0.0688177  | 0.0688092  | 0.420668 | 1.57933 |
| Atco_P12_P13_4_1_4-5_2_3 | 0.0686909  | 0.0688818  | 0.208142 | 1.79186 |
| Atco_P8_P12_2_1_2-5_2_2  | 0.0688924  | 0.0688832  | 0.443519 | 1.55648 |
| Atco_P14_P17_3_4_4-5_4_5 | 0.0689387  | 0.0689503  | 0.249272 | 1.75073 |
| Atco_P9_P14_3_1_2-5_2_4  | 0.0690363  | 0.0690478  | 0.285557 | 1.71444 |
| Atco_P9_P17_2_2_2-5_4_5  | 0.0690606  | 0.0691303  | 0.369856 | 1.63014 |
| Atco_P9_P14_2_2_2-4_2_5  | 0.0691736  | 0.0691875  | 0.420595 | 1.5794  |
| Atco_P12_P13_2_4_3-5_2_3 | 0.0691424  | 0.0692098  | 0.328461 | 1.67154 |
| Atco_P17_P17_5_4_5-5_5_4 | 0.0692845  | 0.0692736  | 0.241603 | 1.7584  |
| Atco_P15_P16_4_4_4-5_4_4 | 0.0690698  | 0.069287   | 0.302061 | 1.69794 |
| Atco_P12_P16_4_2_3-5_5_3 | 0.0694243  | 0.0693726  | 0.252042 | 1.74796 |

| name                     | $\Delta_l$ | $\Delta_a$ | $c_l$    | $c_a$   |
|--------------------------|------------|------------|----------|---------|
| Atco_P12_P13_2_2_5-5_2_3 | 0.0694476  | 0.069455   | 0.411384 | 1.58862 |
| Atco_P16_P17_5_4_4-4_5_5 | 0.0693009  | 0.0695021  | 0.272603 | 1.7274  |
| Atco_P14_P14_4_3_4-5_4_2 | 0.069336   | 0.0695546  | 0.212211 | 1.78779 |
| Atco_P9_P10_3_2_1-2_2_3  | 0.0695816  | 0.0696048  | 0.389205 | 1.6108  |
| Atco_P13_P14_3_4_3-4_2_5 | 0.0695166  | 0.0696398  | 0.259373 | 1.74063 |
| Atco_P10_P15_4_1_2-5_3_4 | 0.0695932  | 0.0696676  | 0.505547 | 1.49445 |
| Atco_P10_P13_3_3_1-3_2_5 | 0.069694   | 0.0696524  | 0.439057 | 1.56094 |
| Atco_P12_P14_2_2_5-5_4_2 | 0.0697335  | 0.0698138  | 0.317421 | 1.68258 |
| Atco_P12_P13_3_4_2-4_2_4 | 0.0698581  | 0.0698572  | 0.373014 | 1.62699 |
| Atco_P13_P17_4_3_3-4_5_5 | 0.0698304  | 0.0698878  | 0.260012 | 1.73999 |
| Atco_P12_P15_2_3_4-5_3_4 | 0.0697727  | 0.0699222  | 0.258858 | 1.74114 |
| Atco_P14_P17_5_3_3-5_5_4 | 0.0699965  | 0.0699613  | 0.338262 | 1.66174 |
| Atco_P10_P13_4_1_2-4_3_3 | 0.0699766  | 0.0700215  | 0.477839 | 1.52216 |
| Atco_P14_P16_4_2_5-4_4_5 | 0.0700769  | 0.0700854  | 0.319254 | 1.68075 |
| Atco_P7_P7_1_1_2-2_1_1   | 0.0701156  | 0.0701068  | 0.553446 | 1.44655 |
| Atco_P13_P15_3_4_3-5_3_4 | 0.0699533  | 0.0701312  | 0.306235 | 1.69377 |
| Atco_P12_P16_3_4_2-5_3_5 | 0.0701466  | 0.0701313  | 0.376618 | 1.62338 |
| Atco_P12_P14_5_2_2-5_2_4 | 0.0700546  | 0.0701688  | 0.477082 | 1.52292 |
| Atco_P7_P10_1_1_2-3_1_3  | 0.0701693  | 0.0701585  | 0.490149 | 1.50985 |
| Atco_P13_P18_5_3_2-5_5_5 | 0.0701134  | 0.0702143  | 0.207462 | 1.79254 |
| Atco_P9_P11_3_1_2-2_2_4  | 0.070242   | 0.0701737  | 0.495909 | 1.50409 |
| Atco_P15_P15_3_4_5-5_4_3 | 0.0702146  | 0.0702462  | 0.266011 | 1.73399 |
| Atco_P9_P12_2_2_2-5_2_2  | 0.0702691  | 0.0703178  | 0.30505  | 1.69495 |
| Atco_P15_P16_5_4_3-5_4_4 | 0.0702076  | 0.0703305  | 0.25515  | 1.74485 |
| Atco_P15_P17_4_3_5-4_5_5 | 0.0700292  | 0.0703479  | 0.240674 | 1.75933 |
| Atco_P14_P16_5_3_3-4_5_4 | 0.0703395  | 0.0703621  | 0.25988  | 1.74012 |
| Atco_P9_P15_4_1_1-4_3_5  | 0.0704932  | 0.0704733  | 0.388087 | 1.61191 |
| Atco_P9_P15_1_2_3-5_3_4  | 0.0705572  | 0.0705321  | 0.360697 | 1.6393  |
| Atco_P12_P13_4_3_2-4_3_3 | 0.0706252  | 0.0707875  | 0.262046 | 1.73795 |
| Atco_P12_P12_3_2_4-3_3_3 | 0.0708307  | 0.070852   | 0.30903  | 1.69097 |
| Atco_P11_P12_1_3_4-5_2_2 | 0.0707555  | 0.0708843  | 0.335974 | 1.66403 |
| Atco_P14_P17_4_2_5-4_5_5 | 0.0708743  | 0.0709089  | 0.269818 | 1.73018 |
| Atco_P9_P13_3_2_1-3_3_4  | 0.0708072  | 0.0709268  | 0.333631 | 1.66637 |
| Atco_P8_P13_3_1_1-4_2_4  | 0.0708563  | 0.0709807  | 0.492383 | 1.50762 |
| Atco_P13_P14_2_3_5-5_3_3 | 0.071014   | 0.0710762  | 0.292184 | 1.70782 |
| Atco_P13_P18_4_3_3-5_5_5 | 0.0710652  | 0.0711323  | 0.261441 | 1.73856 |
| Atco_P9_P16_2_2_2-5_4_4  | 0.0711708  | 0.0711172  | 0.33959  | 1.66041 |
| Atco_P13_P14_3_3_4-5_4_2 | 0.0708248  | 0.0712079  | 0.27139  | 1.72861 |
| Atco_P10_P15_4_2_1-3_4_5 | 0.0711107  | 0.0712681  | 0.288087 | 1.71191 |

| name                     | $\Delta_l$ | $\Delta_a$ | $c_l$    | $c_a$   |
|--------------------------|------------|------------|----------|---------|
| Atco_P11_P14_3_2_3-5_4_2 | 0.0710775  | 0.0712995  | 0.256828 | 1.74317 |
| Atco_P12_P17_2_3_4-5_4_5 | 0.0712851  | 0.0713086  | 0.325421 | 1.67458 |
| Atco_P9_P15_2_3_1-5_2_5  | 0.0713236  | 0.0713625  | 0.412847 | 1.58715 |
| Atco_P10_P13_3_1_3-4_2_4 | 0.0713881  | 0.0714196  | 0.349627 | 1.65037 |
| Atco_P12_P13_3_3_3-5_3_2 | 0.071402   | 0.0714518  | 0.298886 | 1.70111 |
| Atco_P6_P11_1_1_1-4_2_2  | 0.071388   | 0.071452   | 0.364293 | 1.63571 |
| Atco_P7_P7_2_1_1-2_1_1   | 0.0714672  | 0.0715049  | 0.495586 | 1.50441 |
| Atco_P12_P14_3_2_4-4_3_4 | 0.0711213  | 0.0715163  | 0.506166 | 1.49383 |
| Atco_P10_P15_3_2_2-4_4_4 | 0.0715142  | 0.0715405  | 0.301884 | 1.69812 |
| Atco_P12_P15_4_2_3-4_5_3 | 0.0714977  | 0.0715527  | 0.255236 | 1.74476 |
| Atco_P12_P16_2_3_4-5_4_4 | 0.0715354  | 0.0715618  | 0.276283 | 1.72372 |
| Atco_P10_P13_2_1_4-5_2_3 | 0.0715602  | 0.071595   | 0.419015 | 1.58098 |
| Atco_P10_P13_4_1_2-4_2_4 | 0.0715957  | 0.0716422  | 0.345847 | 1.65415 |
| Atco_P10_P15_2_2_3-5_4_3 | 0.0716298  | 0.0716491  | 0.314607 | 1.68539 |
| Atco_P11_P15_2_2_4-5_2_5 | 0.0716716  | 0.0716455  | 0.431055 | 1.56895 |
| Atco_P8_P15_2_2_1-4_3_5  | 0.0716868  | 0.0716458  | 0.405308 | 1.59469 |
| Atco_P12_P12_2_2_5-4_3_2 | 0.0715917  | 0.0717317  | 0.36646  | 1.63354 |
| Atco_P11_P16_3_2_3-4_4_5 | 0.0717146  | 0.0717712  | 0.330678 | 1.66932 |
| Atco_P8_P15_2_1_2-4_3_5  | 0.0718048  | 0.0718451  | 0.556926 | 1.44307 |
| Atco_P15_P15_4_3_5-4_5_3 | 0.0717668  | 0.0718818  | 0.281949 | 1.71805 |
| Atco_P10_P12_3_1_3-5_2_2 | 0.0718888  | 0.0720107  | 0.413273 | 1.58673 |
| Atco_P12_P12_3_3_3-3_3_3 | 0.0719053  | 0.0720494  | 0.359771 | 1.64023 |
| Atco_P15_P16_4_3_5-4_5_4 | 0.0720673  | 0.0722142  | 0.239783 | 1.76022 |
| Atco_P14_P15_3_3_5-4_4_4 | 0.0722981  | 0.0723231  | 0.285179 | 1.71482 |
| Atco_P9_P14_2_1_3-5_2_4  | 0.0724398  | 0.0725029  | 0.349754 | 1.65025 |
| Atco_P15_P18_3_4_5-5_5_5 | 0.0724633  | 0.0725628  | 0.263991 | 1.73601 |
| Atco_P13_P13_4_3_3-5_3_2 | 0.0726475  | 0.0726026  | 0.262486 | 1.73751 |
| Atco_P11_P11_4_2_2-4_2_2 | 0.0724466  | 0.0726493  | 0.351154 | 1.64885 |
| Atco_P14_P15_4_4_3-5_3_4 | 0.0725205  | 0.0726987  | 0.274418 | 1.72558 |
| Atco_P10_P13_3_2_2-4_3_3 | 0.072721   | 0.0727151  | 0.361876 | 1.63812 |
| Atco_P13_P14_2_4_4-5_2_4 | 0.0726199  | 0.0727338  | 0.272847 | 1.72715 |
| Atco_P7_P11_2_1_1-4_1_3  | 0.0727405  | 0.0727415  | 0.310605 | 1.6894  |
| Atco_P11_P15_2_2_4-5_4_3 | 0.072616   | 0.072774   | 0.274953 | 1.72505 |
| Atco_P11_P11_3_2_3-3_3_2 | 0.0726746  | 0.0727802  | 0.283196 | 1.7168  |
| Atco_P12_P16_5_2_2-4_5_4 | 0.0726456  | 0.0728245  | 0.210761 | 1.78924 |
| Atco_P12_P14_2_2_5-5_3_3 | 0.0728965  | 0.0729046  | 0.325741 | 1.67426 |
| Atco_P10_P14_4_2_1-4_3_4 | 0.0729489  | 0.0728709  | 0.294228 | 1.70577 |
| Atco_P15_P16_5_3_4-5_5_3 | 0.0727732  | 0.072985   | 0.249333 | 1.75067 |
| Atco_P11_P16_2_3_3-5_3_5 | 0.073005   | 0.0729825  | 0.349104 | 1.6509  |



| name                     | $\Delta_l$ | $\Delta_a$ | $c_l$    | $c_a$    |
|--------------------------|------------|------------|----------|----------|
| Atco_P9_P11_2_2_2-3_2_3  | 0.0730153  | 0.0729865  | 0.356737 | 1.64326  |
| Atco_P13_P17_5_3_2-4_5_5 | 0.0729382  | 0.0730168  | 0.238775 | 1.76123  |
| Atco_P12_P16_4_2_3-4_5_4 | 0.0730931  | 0.073089   | 0.295854 | 1.70415  |
| Atco_P10_P14_4_2_1-2_4_5 | 0.0729515  | 0.0731047  | 0.328866 | 1.67113  |
| Atco_P15_P15_4_4_4-5_4_3 | 0.0730742  | 0.0732391  | 0.256793 | 1.74321  |
| Atco_P9_P11_3_2_1-3_2_3  | 0.0732977  | 0.0732825  | 0.265979 | 1.73402  |
| Atco_P12_P16_4_3_2-5_4_4 | 0.0732399  | 0.0733058  | 0.299288 | 1.70071  |
| Atco_P8_P10_3_1_1-1_2_4  | 0.073336   | 0.0733531  | 0.51731  | 1.48269  |
| Atco_P11_P12_2_3_3-4_2_3 | 0.0733518  | 0.0733771  | 0.301608 | 1.69839  |
| Atco_P8_P10_1_1_3-4_1_2  | 0.0734303  | 0.0734391  | 0.580532 | 1.41947  |
| Atco_P14_P14_4_4_3-5_3_3 | 0.0734486  | 0.0735012  | 0.288805 | 1.7112   |
| Atco_P8_P11_1_1_3-4_2_2  | 0.0734435  | 0.0735207  | 0.407206 | 1.59279  |
| Atco_P9_P12_3_2_1-4_2_3  | 0.0735667  | 0.0735902  | 0.279463 | 1.72054  |
| Atco_P7_P11_1_1_2-4_1_3  | 0.073713   | 0.073686   | 0.627698 | 1.3723   |
| Atco_P17_P17_4_5_5-5_4_5 | 0.0583045  | 0.0737668  | 0.354813 | 1.64519  |
| Atco_P7_P12_1_1_2-4_2_3  | 0.0489298  | 0.0738033  | 1.06675  | 0.933254 |
| Atco_P11_P16_4_3_1-5_3_5 | 0.0736203  | 0.0738099  | 0.174809 | 1.82519  |
| Atco_P15_P16_3_4_5-5_3_5 | 0.0736746  | 0.0738594  | 0.216602 | 1.7834   |
| Atco_P12_P14_3_4_2-4_2_5 | 0.0738679  | 0.0739411  | 0.316503 | 1.6835   |
| Atco_P8_P13_1_2_2-5_2_3  | 0.0737984  | 0.0739571  | 0.351902 | 1.6481   |
| Atco_P14_P16_4_3_4-5_5_3 | 0.0739327  | 0.0739784  | 0.245526 | 1.75447  |
| Atco_P12_P15_5_2_2-5_2_5 | 0.0740522  | 0.0740452  | 0.485737 | 1.51426  |
| Atco_P11_P14_4_2_2-2_4_5 | 0.0740743  | 0.0741557  | 0.372192 | 1.62781  |
| Atco_P10_P12_3_3_1-3_2_4 | 0.074304   | 0.0742664  | 0.437689 | 1.56231  |
| Atco_P9_P15_3_2_1-5_3_4  | 0.0742971  | 0.0743497  | 0.426563 | 1.57344  |
| Atco_P14_P16_5_4_2-5_4_4 | 0.0742449  | 0.0743526  | 0.223807 | 1.77619  |
| Atco_P9_P11_2_2_2-3_1_4  | 0.0743762  | 0.0744187  | 0.464527 | 1.53547  |
| Atco_P14_P16_3_4_4-5_4_4 | 0.0744324  | 0.0745099  | 0.28332  | 1.71668  |
| Atco_P15_P16_3_4_5-4_4_5 | 0.0742905  | 0.0745197  | 0.232932 | 1.76707  |
| Atco_P9_P9_2_1_3-4_1_1   | 0.0743843  | 0.0745257  | 0.4906   | 1.5094   |
| Atco_P11_P14_3_3_2-4_3_4 | 0.0745771  | 0.0745302  | 0.356835 | 1.64316  |
| Atco_P15_P17_5_4_3-4_5_5 | 0.0745852  | 0.0745658  | 0.231423 | 1.76858  |
| Atco_P13_P14_5_3_2-3_4_4 | 0.0745777  | 0.0746373  | 0.276036 | 1.72396  |
| Atco_P14_P16_4_5_2-5_3_5 | 0.0746436  | 0.0746672  | 0.313921 | 1.68608  |
| Atco_P10_P11_3_2_2-2_2_4 | 0.0745538  | 0.0746835  | 0.415874 | 1.58413  |
| Atco_P11_P13_4_1_3-5_2_3 | 0.0747745  | 0.0747631  | 0.394941 | 1.60506  |
| Atco_P12_P13_4_3_2-5_2_3 | 0.0746636  | 0.0748752  | 0.307762 | 1.69224  |
| Atco_P10_P13_4_2_1-4_2_4 | 0.0748262  | 0.0749768  | 0.310124 | 1.68988  |
| Atco_P16_P16_4_4_5-5_5_3 | 0.0749396  | 0.0750309  | 0.244618 | 1.75538  |

| name                     | $\Delta_l$ | $\Delta_a$ | $c_l$    | $c_a$   |
|--------------------------|------------|------------|----------|---------|
| Atco_P12_P14_2_4_3-5_2_4 | 0.0750476  | 0.0750244  | 0.264587 | 1.73541 |
| Atco_P10_P12_2_2_3-3_2_4 | 0.0750072  | 0.07506    | 0.423581 | 1.57642 |
| Atco_P8_P8_2_1_2-3_1_1   | 0.0751073  | 0.0751354  | 0.564509 | 1.43549 |
| Atco_P14_P16_4_4_3-4_4_5 | 0.0750445  | 0.0751916  | 0.27304  | 1.72696 |
| Atco_P14_P18_5_4_2-5_5_5 | 0.074956   | 0.0752355  | 0.233242 | 1.76676 |
| Atco_P8_P9_2_1_2-3_2_1   | 0.0752768  | 0.0752684  | 0.393749 | 1.60625 |
| Atco_P10_P12_2_3_2-4_2_3 | 0.0752946  | 0.0752625  | 0.384523 | 1.61548 |
| Atco_P9_P13_1_2_3-5_3_2  | 0.0749939  | 0.0752976  | 0.345164 | 1.65484 |
| Atco_P16_P17_4_4_5-4_5_5 | 0.0751509  | 0.0753445  | 0.22368  | 1.77632 |
| Atco_P9_P14_1_2_3-5_3_3  | 0.0753161  | 0.0753796  | 0.265072 | 1.73493 |
| Atco_P11_P11_2_2_4-4_1_3 | 0.0754112  | 0.0753703  | 0.412838 | 1.58716 |
| Atco_P10_P14_2_2_3-5_4_2 | 0.0755824  | 0.0755933  | 0.337149 | 1.66285 |
| Atco_P10_P14_2_2_3-4_3_4 | 0.0756251  | 0.0756127  | 0.475802 | 1.5242  |
| Atco_P9_P15_2_2_2-4_3_5  | 0.0756306  | 0.0756774  | 0.376363 | 1.62364 |
| Atco_P12_P13_4_2_3-3_4_3 | 0.0757343  | 0.0756583  | 0.325461 | 1.67454 |
| Atco_P12_P15_4_4_1-5_2_5 | 0.0757881  | 0.0758063  | 0.219373 | 1.78063 |
| Atco_P9_P12_1_1_4-5_2_2  | 0.0758552  | 0.0758467  | 0.431991 | 1.56801 |
| Atco_P12_P17_5_2_2-5_5_4 | 0.0758678  | 0.0759     | 0.248416 | 1.75158 |
| Atco_P14_P15_5_4_2-5_3_4 | 0.0758635  | 0.0759939  | 0.185913 | 1.81409 |
| Atco_P10_P10_2_2_3-3_1_3 | 0.0759502  | 0.0760683  | 0.467915 | 1.53209 |
| Atco_P11_P14_3_3_2-5_3_3 | 0.0760696  | 0.0761356  | 0.278102 | 1.7219  |
| Atco_P12_P15_4_3_2-3_4_5 | 0.0762088  | 0.0762436  | 0.324935 | 1.67507 |
| Atco_P14_P16_3_3_5-5_5_3 | 0.0761511  | 0.0762705  | 0.25182  | 1.74818 |
| Atco_P7_P9_1_1_2-3_2_1   | 0.0762094  | 0.0762717  | 0.500268 | 1.49973 |
| Atco_P12_P12_4_2_3-5_2_2 | 0.0762368  | 0.0763126  | 0.478895 | 1.52111 |
| Atco_P15_P16_5_3_4-3_5_5 | 0.076184   | 0.0763138  | 0.219507 | 1.78049 |
| Atco_P8_P12_2_2_1-3_2_4  | 0.0762643  | 0.0763419  | 0.457123 | 1.54288 |
| Atco_P15_P17_4_4_4-5_5_4 | 0.0764062  | 0.0763769  | 0.264885 | 1.73511 |
| Atco_P14_P16_4_2_5-4_5_4 | 0.0764553  | 0.0552563  | 0.177828 | 1.82217 |
| Atco_P10_P12_3_1_3-3_2_4 | 0.0763139  | 0.0765755  | 0.394846 | 1.60515 |
| Atco_P12_P16_3_2_4-4_5_4 | 0.0765975  | 0.0766455  | 0.33535  | 1.66465 |
| Atco_P12_P16_3_3_3-4_4_5 | 0.0766207  | 0.0767009  | 0.339405 | 1.66059 |
| Atco_P9_P16_3_2_1-4_4_5  | 0.076638   | 0.0767059  | 0.354229 | 1.64577 |
| Atco_P10_P12_2_2_3-4_1_4 | 0.0766274  | 0.0767219  | 0.435323 | 1.56468 |
| Atco_P10_P12_3_2_2-3_3_3 | 0.076819   | 0.0769754  | 0.32236  | 1.67764 |
| Atco_P13_P14_4_4_2-4_3_4 | 0.0769334  | 0.0770019  | 0.268522 | 1.73148 |
| Atco_P13_P14_5_3_2-2_4_5 | 0.0769761  | 0.0770185  | 0.313764 | 1.68624 |
| Atco_P14_P16_3_3_5-4_4_5 | 0.0769045  | 0.0770441  | 0.348598 | 1.6514  |
| Atco_P12_P15_2_2_5-5_4_3 | 0.0770754  | 0.0770206  | 0.291412 | 1.70859 |

| name                     | $\Delta_l$ | $\Delta_a$ | $c_l$    | $c_a$   |
|--------------------------|------------|------------|----------|---------|
| Atco_P11_P13_3_2_3-3_3_4 | 0.0769877  | 0.0771423  | 0.308823 | 1.69118 |
| Atco_P13_P17_3_2_5-5_4_5 | 0.0771948  | 0.077119   | 0.314083 | 1.68592 |
| Atco_P9_P10_2_1_3-3_1_3  | 0.0772442  | 0.0772338  | 0.514304 | 1.4857  |
| Atco_P11_P16_4_3_1-4_4_5 | 0.0772482  | 0.0771798  | 0.250368 | 1.74963 |
| Atco_P14_P15_3_4_4-4_3_5 | 0.0772842  | 0.0772618  | 0.285774 | 1.71423 |
| Atco_P11_P17_4_3_1-5_4_5 | 0.0773031  | 0.0773022  | 0.22125  | 1.77875 |
| Atco_P12_P13_4_2_3-5_3_2 | 0.077365   | 0.0774481  | 0.317891 | 1.68211 |
| Atco_P7_P13_2_1_1-4_3_3  | 0.0773893  | 0.077459   | 0.403181 | 1.59682 |
| Atco_P13_P15_4_3_3-4_4_4 | 0.0774782  | 0.0773118  | 0.386314 | 1.61369 |
| Atco_P12_P15_4_3_2-4_4_4 | 0.0774929  | 0.0774985  | 0.286399 | 1.7136  |
| Atco_P11_P11_4_1_3-4_2_2 | 0.077475   | 0.0775184  | 0.434838 | 1.56516 |
| Atco_P11_P11_3_1_4-3_2_3 | 0.0775212  | 0.0775573  | 0.439072 | 1.56093 |
| Atco_P11_P12_2_2_4-4_2_3 | 0.0775184  | 0.0775577  | 0.390951 | 1.60905 |
| Atco_P12_P15_2_3_4-5_2_5 | 0.0774135  | 0.0776194  | 0.328755 | 1.67125 |
| Atco_P6_P8_1_1_1-2_1_2   | 0.0775891  | 0.0776308  | 0.492537 | 1.50746 |
| Atco_P9_P13_2_2_2-4_3_3  | 0.0775081  | 0.0777013  | 0.370375 | 1.62963 |
| Atco_P12_P12_2_3_4-4_2_3 | 0.0776123  | 0.0777254  | 0.308746 | 1.69125 |
| Atco_P13_P17_3_4_3-5_4_5 | 0.0775839  | 0.0777361  | 0.292016 | 1.70798 |
| Atco_P11_P13_4_2_2-2_4_4 | 0.0776548  | 0.0777692  | 0.316819 | 1.68318 |
| Atco_P11_P14_4_1_3-5_2_4 | 0.0777569  | 0.0777822  | 0.415326 | 1.58467 |
| Atco_P7_P15_1_1_2-5_3_4  | 0.0778516  | 0.077847   | 0.469121 | 1.53088 |
| Atco_P13_P16_5_3_2-3_5_5 | 0.077964   | 0.077923   | 0.277282 | 1.72272 |
| Atco_P16_P17_4_5_4-5_4_5 | 0.0779788  | 0.0779937  | 0.255138 | 1.74486 |
| Atco_P11_P17_3_2_3-4_5_5 | 0.0780826  | 0.0713844  | 0.218776 | 1.78122 |
| Atco_P14_P14_4_4_3-4_4_3 | 0.0781155  | 0.078084   | 0.317229 | 1.68277 |
| Atco_P11_P13_3_3_2-3_2_5 | 0.0780231  | 0.0781415  | 0.31649  | 1.68351 |
| Atco_P7_P11_1_2_1-4_1_3  | 0.0781743  | 0.0781992  | 0.358118 | 1.64188 |
| Atco_P12_P16_3_2_4-4_4_5 | 0.0783013  | 0.0783731  | 0.324028 | 1.67597 |
| Atco_P14_P15_3_3_5-5_2_5 | 0.0783873  | 0.0783601  | 0.305832 | 1.69417 |
| Atco_P8_P13_2_1_2-3_3_4  | 0.0782949  | 0.0784056  | 0.534365 | 1.46564 |
| Atco_P9_P14_1_2_3-5_2_4  | 0.0775788  | 0.0784512  | 0.380189 | 1.61981 |
| Atco_P10_P11_4_1_2-3_3_2 | 0.078426   | 0.0784819  | 0.394691 | 1.60531 |
| Atco_P13_P14_4_2_4-3_3_5 | 0.0784578  | 0.0785588  | 0.324765 | 1.67523 |
| Atco_P14_P14_3_4_4-4_2_5 | 0.078515   | 0.0786221  | 0.299524 | 1.70048 |
| Atco_P11_P13_4_3_1-4_2_4 | 0.0785865  | 0.0786327  | 0.253785 | 1.74622 |
| Atco_P8_P14_1_2_2-5_2_4  | 0.0784393  | 0.0786376  | 0.36273  | 1.63727 |
| Atco_P15_P16_4_4_4-4_5_4 | 0.0785741  | 0.0786663  | 0.281809 | 1.71819 |
| Atco_P10_P16_2_2_3-5_4_4 | 0.0786591  | 0.0787618  | 0.246911 | 1.75309 |
| Atco_P13_P13_3_2_5-4_2_4 | 0.0786177  | 0.0787774  | 0.443264 | 1.55674 |

| name                     | $\Delta_l$ | $\Delta_a$ | $c_l$    | $c_a$   |
|--------------------------|------------|------------|----------|---------|
| Atco_P9_P11_4_1_1-2_3_3  | 0.0788208  | 0.0788344  | 0.392602 | 1.6074  |
| Atco_P13_P14_4_3_3-3_4_4 | 0.0788125  | 0.0788951  | 0.318675 | 1.68133 |
| Atco_P8_P9_1_1_3-3_2_1   | 0.0787999  | 0.0789062  | 0.54005  | 1.45995 |
| Atco_P13_P14_4_4_2-3_3_5 | 0.0788643  | 0.078944   | 0.341311 | 1.65869 |
| Atco_P13_P17_2_3_5-5_4_5 | 0.0789461  | 0.0789934  | 0.234514 | 1.76549 |
| Atco_P14_P17_3_3_5-5_5_4 | 0.0789797  | 0.0790395  | 0.213887 | 1.78611 |
| Atco_P8_P8_2_1_2-2_2_1   | 0.0790561  | 0.0790383  | 0.390708 | 1.60929 |
| Atco_P11_P16_2_2_4-5_3_5 | 0.0790803  | 0.0791001  | 0.651674 | 1.34833 |
| Atco_P10_P13_1_2_4-5_3_2 | 0.0790791  | 0.079137   | 0.385872 | 1.61413 |
| Atco_P9_P11_1_1_4-4_3_1  | 0.0791308  | 0.0791421  | 0.467735 | 1.53226 |
| Atco_P11_P13_2_2_4-4_3_3 | 0.0790014  | 0.0791861  | 0.312466 | 1.68753 |
| Atco_P9_P15_2_2_2-5_4_3  | 0.0792125  | 0.079222   | 0.346318 | 1.65368 |
| Atco_P12_P15_3_3_3-5_4_3 | 0.0792254  | 0.0792245  | 0.292998 | 1.707   |
| Atco_P9_P11_1_2_3-4_2_2  | 0.0792324  | 0.0792654  | 0.346998 | 1.653   |
| Atco_P9_P11_3_1_2-3_1_4  | 0.079321   | 0.0792884  | 0.242223 | 1.75778 |
| Atco_P10_P10_1_2_4-4_1_2 | 0.079305   | 0.0793576  | 0.482862 | 1.51714 |
| Atco_P12_P13_5_2_2-4_3_3 | 0.0793229  | 0.0793689  | 0.326645 | 1.67335 |
| Atco_P10_P13_3_3_1-4_2_4 | 0.0793575  | 0.0794715  | 0.257038 | 1.74296 |
| Atco_P10_P15_3_2_2-3_4_5 | 0.0794218  | 0.0794951  | 0.371193 | 1.62881 |
| Atco_P11_P16_2_2_4-5_4_4 | 0.0794734  | 0.0795568  | 0.268587 | 1.73141 |
| Atco_P15_P17_5_5_2-5_4_5 | 0.0795747  | 0.0795534  | 0.236938 | 1.76306 |
| Atco_P15_P16_3_5_4-5_3_5 | 0.0794601  | 0.079733   | 0.242109 | 1.75789 |
| Atco_P9_P9_2_2_2-2_2_2   | 0.0798092  | 0.0798493  | 0.478898 | 1.5211  |
| Atco_P11_P13_2_3_3-4_2_4 | 0.079569   | 0.0798672  | 0.269216 | 1.73078 |
| Atco_P8_P11_1_1_3-4_3_1  | 0.0798836  | 0.0799139  | 0.433949 | 1.56605 |
| Atco_P11_P14_3_1_4-4_3_4 | 0.0798924  | 0.0800069  | 0.434392 | 1.56561 |
| Atco_P15_P17_4_4_4-4_5_5 | 0.0800327  | 0.0800259  | 0.298308 | 1.70169 |
| Atco_P8_P11_2_1_2-3_3_2  | 0.0800389  | 0.0800388  | 0.34947  | 1.65053 |
| Atco_P11_P14_2_3_3-4_3_4 | 0.0799083  | 0.0800543  | 0.306963 | 1.69304 |
| Atco_P11_P16_4_2_2-4_5_4 | 0.0800564  | 0.0800057  | 0.230734 | 1.76927 |
| Atco_P12_P12_3_3_3-4_3_2 | 0.0799632  | 0.08007    | 0.30128  | 1.69872 |
| Atco_P8_P11_3_1_1-2_3_3  | 0.0801114  | 0.0801239  | 0.372238 | 1.62776 |
| Atco_P14_P15_5_4_2-4_4_4 | 0.0801433  | 0.0801167  | 0.249604 | 1.7504  |
| Atco_P15_P15_3_5_4-5_3_4 | 0.0801194  | 0.0801654  | 0.282931 | 1.71707 |
| Atco_P8_P9_2_2_1-2_1_3   | 0.0801387  | 0.0801669  | 0.468749 | 1.53125 |
| Atco_P9_P14_4_1_1-4_2_5  | 0.0800655  | 0.080168   | 0.447685 | 1.55231 |
| Atco_P9_P11_3_1_2-4_1_3  | 0.0801528  | 0.0801691  | 0.25398  | 1.74602 |
| Atco_P9_P12_3_1_2-4_1_4  | 0.0801697  | 0.0800663  | 0.424295 | 1.5757  |
| Atco_P14_P14_3_4_4-4_3_4 | 0.0800969  | 0.0801791  | 0.333447 | 1.66655 |

| name                     | $\Delta_l$ | $\Delta_a$ | $c_l$    | $c_a$   |
|--------------------------|------------|------------|----------|---------|
| Atco_P11_P14_3_4_1-4_2_5 | 0.0798688  | 0.0801795  | 0.422608 | 1.57739 |
| Atco_P13_P18_3_2_5-5_5_5 | 0.0799237  | 0.0802139  | 0.273987 | 1.72601 |
| Atco_P10_P14_3_2_2-3_4_4 | 0.0802228  | 0.0802142  | 0.37068  | 1.62932 |
| Atco_P13_P17_4_4_2-5_4_5 | 0.0802559  | 0.0802439  | 0.319351 | 1.68065 |
| Atco_P9_P15_1_2_3-5_2_5  | 0.0802612  | 0.0802647  | 0.347213 | 1.65279 |
| Atco_P12_P17_3_2_4-4_5_5 | 0.0803041  | 0.0803124  | 0.304192 | 1.69581 |
| Atco_P8_P15_1_2_2-5_2_5  | 0.0802056  | 0.0803611  | 0.371365 | 1.62863 |
| Atco_P12_P13_5_2_2-3_4_3 | 0.0802721  | 0.0803841  | 0.258052 | 1.74195 |
| Atco_P9_P12_3_1_2-4_3_2  | 0.0803894  | 0.0803984  | 0.448926 | 1.55107 |
| Atco_P10_P11_3_2_2-3_3_2 | 0.08037    | 0.0804041  | 0.363378 | 1.63662 |
| Atco_P12_P13_4_2_3-4_4_2 | 0.0803369  | 0.0804136  | 0.268739 | 1.73126 |
| Atco_P12_P15_2_4_3-5_2_5 | 0.0804392  | 0.0804284  | 0.243621 | 1.75638 |
| Atco_P10_P12_1_3_3-5_2_2 | 0.0804623  | 0.0805159  | 0.339124 | 1.66088 |
| Atco_P11_P13_3_2_3-4_4_2 | 0.0805205  | 0.0805269  | 0.268282 | 1.73172 |
| Atco_P16_P17_4_4_5-5_5_4 | 0.0803667  | 0.0805273  | 0.248087 | 1.75191 |
| Atco_P12_P14_5_2_2-4_4_3 | 0.0806016  | 0.0807177  | 0.254303 | 1.7457  |
| Atco_P7_P10_1_1_2-3_2_2  | 0.0806481  | 0.0807461  | 0.468325 | 1.53168 |
| Atco_P13_P15_2_4_4-5_2_5 | 0.080463   | 0.0808465  | 0.305264 | 1.69474 |
| Atco_P16_P16_3_5_5-5_3_5 | 0.0808381  | 0.0808814  | 0.199146 | 1.80085 |
| Atco_P14_P15_5_4_2-3_4_5 | 0.0807665  | 0.0808828  | 0.28558  | 1.71442 |
| Atco_P11_P16_3_2_3-5_5_3 | 0.0809006  | 0.0809164  | 0.30264  | 1.69736 |
| Atco_P12_P15_2_3_4-4_3_5 | 0.0807956  | 0.0809927  | 0.249393 | 1.75061 |
| Atco_P10_P16_2_3_2-5_3_5 | 0.0810123  | 0.0809583  | 0.306854 | 1.69315 |
| Atco_P12_P15_3_4_2-5_3_4 | 0.0809647  | 0.0810621  | 0.351965 | 1.64803 |
| Atco_P13_P14_3_3_4-4_2_5 | 0.0810174  | 0.0810702  | 0.29391  | 1.70609 |
| Atco_P14_P15_5_3_3-3_5_4 | 0.0811074  | 0.0810877  | 0.282931 | 1.71707 |
| Atco_P11_P13_2_2_4-4_2_4 | 0.0811742  | 0.0811758  | 0.449718 | 1.55028 |
| Atco_P9_P13_3_2_1-5_2_3  | 0.0810958  | 0.0811843  | 0.390403 | 1.6096  |
| Atco_P13_P16_4_3_3-5_5_3 | 0.0811711  | 0.081187   | 0.254308 | 1.74569 |
| Atco_P13_P13_4_4_2-5_2_3 | 0.0810071  | 0.0812144  | 0.245341 | 1.75466 |
| Atco_P11_P16_3_3_2-5_4_4 | 0.0811774  | 0.08122    | 0.339075 | 1.66092 |
| Atco_P13_P15_4_2_4-3_4_5 | 0.0808853  | 0.0812203  | 0.316376 | 1.68362 |
| Atco_P8_P9_1_2_2-3_1_2   | 0.0812497  | 0.0812516  | 0.354645 | 1.64535 |
| Atco_P14_P14_2_4_5-5_2_4 | 0.0810224  | 0.0813102  | 0.322061 | 1.67794 |
| Atco_P6_P11_1_1_1-3_2_3  | 0.0812731  | 0.0813203  | 0.45907  | 1.54093 |
| Atco_P9_P12_2_2_2-3_2_4  | 0.0811172  | 0.0813321  | 0.484693 | 1.51531 |
| Atco_P12_P18_4_3_2-5_5_5 | 0.0812831  | 0.0814085  | 0.268633 | 1.73137 |
| Atco_P9_P13_1_1_4-5_3_2  | 0.0814499  | 0.0814231  | 0.358904 | 1.6411  |
| Atco_P10_P17_3_2_2-4_5_5 | 0.0814466  | 0.0814507  | 0.368111 | 1.63189 |

| name                     | $\Delta_l$ | $\Delta_a$ | $c_l$    | $c_a$   |
|--------------------------|------------|------------|----------|---------|
| Atco_P15_P16_5_4_3-5_5_3 | 0.081332   | 0.0814601  | 0.252723 | 1.74728 |
| Atco_P9_P10_2_2_2-3_2_2  | 0.0813055  | 0.0814931  | 0.389902 | 1.6101  |
| Atco_P11_P15_3_2_3-4_4_4 | 0.0814858  | 0.0815461  | 0.269153 | 1.73085 |
| Atco_P8_P9_2_1_2-2_1_3   | 0.0815499  | 0.0815606  | 0.538544 | 1.46146 |
| Atco_P12_P12_4_3_2-4_3_2 | 0.0814768  | 0.0815922  | 0.271247 | 1.72875 |
| Atco_P13_P14_2_3_5-5_4_2 | 0.0814971  | 0.0817258  | 0.325105 | 1.67489 |
| Atco_P9_P15_3_2_1-3_4_5  | 0.0817503  | 0.0817189  | 0.392319 | 1.60768 |
| Atco_P14_P16_3_5_3-5_3_5 | 0.0815484  | 0.0818074  | 0.292546 | 1.70745 |
| Atco_P11_P13_4_3_1-3_3_4 | 0.0818186  | 0.081808   | 0.286525 | 1.71348 |
| Atco_P10_P13_2_3_2-4_2_4 | 0.0818901  | 0.0820281  | 0.320329 | 1.67967 |
| Atco_P8_P9_3_1_1-2_2_2   | 0.0820211  | 0.0820524  | 0.431562 | 1.56844 |
| Atco_P14_P15_3_3_5-5_5_2 | 0.0818782  | 0.0820892  | 0.297975 | 1.70202 |
| Atco_P13_P15_5_2_3-4_5_3 | 0.0821286  | 0.0577126  | 0.154882 | 1.84512 |
| Atco_P11_P13_3_2_3-3_4_3 | 0.0819149  | 0.0821304  | 0.317464 | 1.68254 |
| Atco_P17_P18_5_5_4-5_5_5 | 0.082034   | 0.0821493  | 0.273037 | 1.72696 |
| Atco_P14_P14_3_3_5-4_4_3 | 0.0818778  | 0.082181   | 0.26436  | 1.73564 |
| Atco_P10_P10_3_1_3-4_2_1 | 0.0822618  | 0.0822307  | 0.494226 | 1.50577 |
| Atco_P8_P12_2_1_2-3_2_4  | 0.0822375  | 0.0822654  | 0.539858 | 1.46014 |
| Atco_P12_P15_3_3_3-4_4_4 | 0.082229   | 0.0822795  | 0.282706 | 1.71729 |
| Atco_P8_P12_2_2_1-4_2_3  | 0.0822533  | 0.0823087  | 0.334344 | 1.66566 |
| Atco_P9_P13_3_2_1-2_3_5  | 0.0822776  | 0.0823112  | 0.480931 | 1.51907 |
| Atco_P14_P15_4_5_2-4_3_5 | 0.0823302  | 0.0822832  | 0.332883 | 1.66712 |
| Atco_P12_P14_4_2_3-5_4_2 | 0.0821337  | 0.0823348  | 0.2884   | 1.7116  |
| Atco_P10_P17_4_2_1-5_4_5 | 0.082317   | 0.0823607  | 0.297312 | 1.70269 |
| Atco_P6_P10_1_1_1-3_2_2  | 0.0824035  | 0.0824219  | 0.493493 | 1.50651 |
| Atco_P13_P16_2_3_5-5_4_4 | 0.0823536  | 0.0824805  | 0.227129 | 1.77287 |
| Atco_P12_P14_2_3_4-4_3_4 | 0.0824811  | 0.0824999  | 0.269664 | 1.73034 |
| Atco_P8_P12_3_1_1-3_3_3  | 0.0823304  | 0.0825172  | 0.347936 | 1.65206 |
| Atco_P12_P15_5_2_2-5_3_4 | 0.0825614  | 0.0824589  | 0.607715 | 1.39228 |
| Atco_P12_P13_3_2_4-3_4_3 | 0.0825755  | 0.0824733  | 0.286887 | 1.71311 |
| Atco_P13_P14_3_2_5-4_2_5 | 0.0825023  | 0.0825971  | 0.443534 | 1.55647 |
| Atco_P11_P13_3_2_3-3_2_5 | 0.0825799  | 0.0826339  | 0.363754 | 1.63625 |
| Atco_P13_P14_3_2_5-5_2_4 | 0.0826386  | 0.0826386  | 0.370454 | 1.62955 |
| Atco_P8_P9_1_2_2-4_1_1   | 0.0828252  | 0.0828635  | 0.517896 | 1.4821  |
| Atco_P10_P10_2_1_4-3_2_2 | 0.082897   | 0.0827751  | 0.508376 | 1.49162 |
| Atco_P15_P17_4_5_3-5_4_5 | 0.0828317  | 0.0829103  | 0.282251 | 1.71775 |
| Atco_P10_P15_3_3_1-4_3_5 | 0.0828273  | 0.0829135  | 0.427032 | 1.57297 |
| Atco_P10_P12_4_2_1-4_1_4 | 0.0827277  | 0.0830127  | 0.446211 | 1.55379 |
| Atco_P15_P16_5_3_4-4_5_4 | 0.0829276  | 0.0831275  | 0.29233  | 1.70767 |

| name                     | $\Delta_l$ | $\Delta_a$ | $c_l$    | $c_a$   |
|--------------------------|------------|------------|----------|---------|
| Atco_P17_P17_4_5_5-4_5_5 | 0.0830425  | 0.0831863  | 0.232585 | 1.76742 |
| Atco_P16_P18_5_5_3-5_5_5 | 0.083132   | 0.0832247  | 0.22068  | 1.77932 |
| Atco_P11_P17_4_2_2-5_5_4 | 0.0831399  | 0.0832297  | 0.278245 | 1.72175 |
| Atco_P11_P15_4_2_2-5_4_3 | 0.0832913  | 0.0833684  | 0.333928 | 1.66607 |
| Atco_P11_P13_4_2_2-3_4_3 | 0.0833559  | 0.0834025  | 0.27951  | 1.72049 |
| Atco_P15_P15_3_4_5-4_4_4 | 0.0834308  | 0.0834121  | 0.27013  | 1.72987 |
| Atco_P6_P13_1_1_1-4_3_3  | 0.083449   | 0.083445   | 0.347721 | 1.65228 |
| Atco_P15_P15_5_3_4-5_5_2 | 0.0833081  | 0.0834728  | 0.188014 | 1.81199 |
| Atco_P15_P15_4_5_3-5_3_4 | 0.0832502  | 0.0834907  | 0.251147 | 1.74885 |
| Atco_P14_P15_4_3_4-5_5_2 | 0.0834585  | 0.0834927  | 0.231004 | 1.769   |
| Atco_P10_P16_3_3_1-5_3_5 | 0.0834973  | 0.0834482  | 0.370644 | 1.62936 |
| Atco_P9_P17_3_2_1-5_4_5  | 0.083297   | 0.0835102  | 0.312958 | 1.68704 |
| Atco_P11_P13_2_3_3-5_3_2 | 0.0834791  | 0.0835478  | 0.341653 | 1.65835 |
| Atco_P8_P8_1_2_2-3_1_1   | 0.0834917  | 0.0835826  | 0.490074 | 1.50993 |
| Atco_P13_P15_2_3_5-5_4_3 | 0.0834096  | 0.0836006  | 0.277804 | 1.7222  |
| Atco_P14_P14_2_4_5-5_3_3 | 0.0836266  | 0.0836806  | 0.249562 | 1.75044 |
| Atco_P6_P14_1_1_1-4_3_4  | 0.0836497  | 0.0836826  | 0.436141 | 1.56386 |
| Atco_P7_P12_1_2_1-4_1_4  | 0.0836741  | 0.0836864  | 0.345993 | 1.65401 |
| Atco_P8_P14_1_1_3-5_3_3  | 0.0836492  | 0.0837014  | 0.360279 | 1.63972 |
| Atco_P12_P13_3_4_2-5_2_3 | 0.0836477  | 0.083791   | 0.255608 | 1.74439 |
| Atco_P13_P14_3_3_4-4_4_3 | 0.0837412  | 0.0838037  | 0.271244 | 1.72876 |
| Atco_P12_P15_2_3_4-5_4_3 | 0.0836513  | 0.0838054  | 0.25869  | 1.74131 |
| Atco_P11_P14_4_2_2-4_4_3 | 0.0837815  | 0.0838414  | 0.344242 | 1.65576 |
| Atco_P12_P12_3_2_4-4_4_1 | 0.0838799  | 0.0837882  | 0.285791 | 1.71421 |
| Atco_P12_P17_4_3_2-4_5_5 | 0.0837298  | 0.0838864  | 0.293751 | 1.70625 |
| Atco_P9_P14_2_1_3-4_3_4  | 0.0838919  | 0.0838459  | 0.425307 | 1.57469 |
| Atco_P10_P12_3_2_2-5_2_2 | 0.0838708  | 0.0839447  | 0.434045 | 1.56595 |
| Atco_P14_P18_3_3_5-5_5_5 | 0.0837636  | 0.0839543  | 0.212866 | 1.78713 |
| Atco_P11_P15_3_4_1-5_2_5 | 0.0837859  | 0.0840484  | 0.309026 | 1.69097 |
| Atco_P12_P12_3_2_4-4_1_4 | 0.0841459  | 0.0843006  | 0.378715 | 1.62128 |
| Atco_P13_P16_3_3_4-5_5_3 | 0.0843924  | 0.0842956  | 0.260282 | 1.73972 |
| Atco_P10_P15_4_1_2-5_2_5 | 0.084401   | 0.0844603  | 0.280865 | 1.71914 |
| Atco_P17_P18_4_5_5-5_5_5 | 0.0844115  | 0.0844637  | 0.251145 | 1.74885 |
| Atco_P11_P14_4_1_3-4_2_5 | 0.084414   | 0.084467   | 0.183858 | 1.81614 |
| Atco_P13_P15_5_3_2-5_4_3 | 0.0842948  | 0.0844694  | 0.279152 | 1.72085 |
| Atco_P12_P13_3_3_3-3_3_4 | 0.0842372  | 0.0845148  | 0.37841  | 1.62159 |
| Atco_P9_P16_2_1_3-5_3_5  | 0.0844638  | 0.0845672  | 0.427096 | 1.5729  |
| Atco_P14_P15_3_4_4-5_4_3 | 0.0845839  | 0.0845213  | 0.254868 | 1.74513 |
| Atco_P9_P11_2_1_3-3_2_3  | 0.0847258  | 0.0847313  | 0.528768 | 1.47123 |

| name                     | $\Delta_l$ | $\Delta_a$ | $c_l$    | $c_a$   |
|--------------------------|------------|------------|----------|---------|
| Atco_P12_P12_2_3_4-4_3_2 | 0.0843504  | 0.0847424  | 0.346712 | 1.65329 |
| Atco_P13_P15_3_2_5-4_4_4 | 0.0847546  | 0.0847694  | 0.274545 | 1.72546 |
| Atco_P13_P16_2_3_5-5_3_5 | 0.0847283  | 0.0847774  | 0.28993  | 1.71007 |
| Atco_P13_P15_3_3_4-4_4_4 | 0.0847702  | 0.0847796  | 0.242474 | 1.75753 |
| Atco_P11_P16_3_1_4-5_3_5 | 0.0846939  | 0.0848444  | 0.437309 | 1.56269 |
| Atco_P11_P14_4_2_2-5_3_3 | 0.0847321  | 0.0848607  | 0.413418 | 1.58658 |
| Atco_P10_P10_3_2_2-4_1_2 | 0.0848478  | 0.0849015  | 0.455434 | 1.54457 |
| Atco_P8_P11_2_1_2-3_1_4  | 0.0848274  | 0.0849089  | 0.347283 | 1.65272 |
| Atco_P12_P12_4_1_4-5_2_2 | 0.0849256  | 0.0848693  | 0.329967 | 1.67003 |
| Atco_P8_P9_2_2_1-3_1_2   | 0.0848885  | 0.0849764  | 0.358319 | 1.64168 |
| Atco_P12_P13_4_3_2-2_3_5 | 0.0851172  | 0.0851519  | 0.361764 | 1.63824 |
| Atco_P15_P16_5_5_2-4_4_5 | 0.0850402  | 0.0851964  | 0.280099 | 1.7199  |
| Atco_P8_P13_1_1_3-5_2_3  | 0.0851629  | 0.0852285  | 0.44167  | 1.55833 |
| Atco_P13_P14_2_3_5-5_2_4 | 0.085151   | 0.0852598  | 0.316663 | 1.68334 |
| Atco_P13_P16_4_4_2-4_4_5 | 0.0852292  | 0.0853694  | 0.323636 | 1.67636 |
| Atco_P8_P15_2_2_1-5_3_4  | 0.0853818  | 0.085392   | 0.291031 | 1.70897 |
| Atco_P13_P14_2_4_4-5_3_3 | 0.0853779  | 0.0854147  | 0.257628 | 1.74237 |
| Atco_P7_P14_1_2_1-5_2_4  | 0.0854193  | 0.0854198  | 0.378758 | 1.62124 |
| Atco_P13_P13_2_4_4-5_3_2 | 0.0854222  | 0.0854187  | 0.323075 | 1.67692 |
| Atco_P8_P14_2_1_2-4_2_5  | 0.085432   | 0.0854812  | 0.468483 | 1.53152 |
| Atco_P11_P13_4_3_1-2_3_5 | 0.085377   | 0.0855101  | 0.383867 | 1.61613 |
| Atco_P11_P11_4_1_3-4_1_3 | 0.0853801  | 0.085531   | 0.174958 | 1.82504 |
| Atco_P11_P14_2_2_4-4_3_4 | 0.0855715  | 0.085565   | 0.575403 | 1.4246  |
| Atco_P11_P14_3_2_3-3_4_4 | 0.0855777  | 0.0856636  | 0.351673 | 1.64833 |
| Atco_P11_P14_2_4_2-5_2_4 | 0.0854572  | 0.0856828  | 0.347138 | 1.65286 |
| Atco_P12_P12_2_4_3-5_2_2 | 0.0856958  | 0.085722   | 0.360397 | 1.6396  |
| Atco_P12_P14_3_3_3-3_3_5 | 0.0856273  | 0.0857394  | 0.294251 | 1.70575 |
| Atco_P11_P13_4_1_3-2_3_5 | 0.0858059  | 0.0857601  | 0.432812 | 1.56719 |
| Atco_P16_P18_4_5_4-5_5_5 | 0.0858215  | 0.0858386  | 0.234292 | 1.76571 |
| Atco_P10_P10_2_2_3-2_2_3 | 0.0857924  | 0.085928   | 0.370102 | 1.6299  |
| Atco_P10_P14_3_3_1-5_2_4 | 0.085816   | 0.0859473  | 0.268305 | 1.7317  |
| Atco_P11_P13_2_3_3-4_3_3 | 0.0858928  | 0.0859699  | 0.375499 | 1.6245  |
| Atco_P14_P16_4_4_3-5_4_4 | 0.0859119  | 0.0860034  | 0.269153 | 1.73085 |
| Atco_P10_P11_4_1_2-3_1_4 | 0.0859834  | 0.0860428  | 0.232378 | 1.76762 |
| Atco_P10_P13_2_1_4-4_3_3 | 0.0860559  | 0.08602    | 0.43484  | 1.56516 |
| Atco_P9_P14_2_2_2-3_3_5  | 0.0861476  | 0.0861325  | 0.355651 | 1.64435 |
| Atco_P7_P9_2_1_1-2_2_2   | 0.0861219  | 0.0861839  | 0.419628 | 1.58037 |
| Atco_P8_P12_1_1_3-4_3_2  | 0.0863003  | 0.0862911  | 0.435528 | 1.56447 |
| Atco_P12_P13_3_3_3-4_3_3 | 0.086232   | 0.0863337  | 0.397061 | 1.60294 |



| name                     | $\Delta_l$ | $\Delta_a$ | $c_l$    | $c_a$   |
|--------------------------|------------|------------|----------|---------|
| Atco_P9_P12_2_2_2-4_3_2  | 0.0863707  | 0.0863497  | 0.371773 | 1.62823 |
| Atco_P16_P16_4_4_5-4_5_4 | 0.0862337  | 0.0864366  | 0.255709 | 1.74429 |
| Atco_P14_P14_4_3_4-4_4_3 | 0.0864095  | 0.0864834  | 0.280419 | 1.71958 |
| Atco_P13_P14_5_3_2-4_4_3 | 0.0864098  | 0.0864983  | 0.229412 | 1.77059 |
| Atco_P14_P16_4_2_5-5_3_5 | 0.0865674  | 0.0863382  | 0.500059 | 1.49994 |
| Atco_P8_P11_2_2_1-3_2_3  | 0.0865625  | 0.0866407  | 0.46539  | 1.53461 |
| Atco_P11_P13_4_1_3-3_2_5 | 0.0864296  | 0.0867265  | 0.268086 | 1.73191 |
| Atco_P9_P11_3_2_1-4_1_3  | 0.0867019  | 0.0867632  | 0.45768  | 1.54232 |
| Atco_P14_P17_5_4_2-4_5_5 | 0.0865202  | 0.0867692  | 0.239041 | 1.76096 |
| Atco_P6_P14_1_1_1-4_2_5  | 0.0866528  | 0.0867791  | 0.532709 | 1.46729 |
| Atco_P10_P10_2_1_4-4_1_2 | 0.0867225  | 0.0868332  | 0.275749 | 1.72425 |
| Atco_P7_P12_1_1_2-4_3_2  | 0.0868315  | 0.0868794  | 0.409469 | 1.59053 |
| Atco_P8_P11_3_1_1-1_3_4  | 0.0868278  | 0.0868974  | 0.45301  | 1.54699 |
| Atco_P15_P16_5_4_3-3_5_5 | 0.0868751  | 0.0869384  | 0.264892 | 1.73511 |
| Atco_P10_P14_4_2_1-5_2_4 | 0.0869252  | 0.086949   | 0.414069 | 1.58593 |
| Atco_P11_P16_2_3_3-5_4_4 | 0.0868668  | 0.0869609  | 0.377234 | 1.62277 |
| Atco_P12_P15_3_4_2-4_3_5 | 0.0869537  | 0.0870394  | 0.362535 | 1.63747 |
| Atco_P11_P14_4_3_1-4_3_4 | 0.0870734  | 0.0870639  | 0.206274 | 1.79373 |
| Atco_P7_P12_2_1_1-3_3_3  | 0.0868625  | 0.0870868  | 0.390071 | 1.60993 |
| Atco_P12_P14_4_3_2-3_4_4 | 0.0870834  | 0.0870965  | 0.298663 | 1.70134 |
| Atco_P13_P14_5_2_3-5_4_2 | 0.0870646  | 0.087166   | 0.287203 | 1.7128  |
| Atco_P14_P15_4_4_3-5_4_3 | 0.0870871  | 0.0872268  | 0.313891 | 1.68611 |
| Atco_P9_P16_1_2_3-5_3_5  | 0.0872828  | 0.087277   | 0.405267 | 1.59473 |
| Atco_P10_P14_2_3_2-5_3_3 | 0.0873005  | 0.0872711  | 0.377468 | 1.62253 |
| Atco_P12_P13_2_3_4-4_3_3 | 0.0873333  | 0.0873264  | 0.268985 | 1.73101 |
| Atco_P8_P9_3_1_1-1_1_4   | 0.0873802  | 0.0874111  | 0.485594 | 1.51441 |
| Atco_P6_P11_1_1_1-3_1_4  | 0.0874693  | 0.0875108  | 0.514478 | 1.48552 |
| Atco_P11_P16_3_3_2-4_4_5 | 0.0875448  | 0.087496   | 0.360393 | 1.63961 |
| Atco_P12_P13_3_3_3-3_2_5 | 0.0875546  | 0.0875098  | 0.329889 | 1.67011 |
| Atco_P8_P13_2_2_1-3_2_5  | 0.0875753  | 0.0875761  | 0.349021 | 1.65098 |
| Atco_P15_P15_3_4_5-3_4_5 | 0.0874626  | 0.087616   | 0.231677 | 1.76832 |
| Atco_P12_P14_2_3_4-5_4_2 | 0.0876498  | 0.0876576  | 0.315854 | 1.68415 |
| Atco_P11_P14_3_1_4-5_2_4 | 0.0876653  | 0.0877219  | 0.302936 | 1.69706 |
| Atco_P13_P13_5_3_2-5_3_2 | 0.087573   | 0.0877838  | 0.261322 | 1.73868 |
| Atco_P12_P15_3_2_4-4_3_5 | 0.0879005  | 0.0879293  | 0.700646 | 1.29935 |
| Atco_P9_P18_2_2_2-5_5_5  | 0.0879643  | 0.0879123  | 0.340072 | 1.65993 |
| Atco_P8_P17_2_2_1-5_4_5  | 0.0879953  | 0.0879489  | 0.271791 | 1.72821 |
| Atco_P13_P14_3_3_4-3_3_5 | 0.0873469  | 0.0879965  | 0.302153 | 1.69785 |
| Atco_P16_P16_3_5_5-5_4_4 | 0.0879908  | 0.0880276  | 0.2378   | 1.7622  |

| name                     | $\Delta_l$ | $\Delta_a$ | $c_l$    | $c_a$   |
|--------------------------|------------|------------|----------|---------|
| Atco_P11_P15_4_3_1-5_3_4 | 0.0880182  | 0.0880931  | 0.196392 | 1.80361 |
| Atco_P11_P11_3_3_2-4_2_2 | 0.0881479  | 0.088091   | 0.350979 | 1.64902 |
| Atco_P9_P13_2_2_2-5_3_2  | 0.0881544  | 0.0881997  | 0.381673 | 1.61833 |
| Atco_P9_P11_2_1_3-4_1_3  | 0.0880326  | 0.0882136  | 0.45187  | 1.54813 |
| Atco_P16_P16_4_5_4-4_5_4 | 0.0882445  | 0.0882387  | 0.305344 | 1.69466 |
| Atco_P13_P15_2_3_5-5_3_4 | 0.0881653  | 0.0882451  | 0.260566 | 1.73943 |
| Atco_P16_P17_3_5_5-5_4_5 | 0.0879829  | 0.0882646  | 0.229519 | 1.77048 |
| Atco_P13_P13_3_3_4-4_4_2 | 0.0882513  | 0.0883172  | 0.321789 | 1.67821 |
| Atco_P8_P10_2_2_1-2_1_4  | 0.0884186  | 0.0884222  | 0.448524 | 1.55148 |
| Atco_P15_P17_3_4_5-5_5_4 | 0.0883204  | 0.0884579  | 0.218776 | 1.78122 |
| Atco_P8_P14_1_2_2-5_3_3  | 0.0885486  | 0.0885421  | 0.460401 | 1.5396  |
| Atco_P11_P13_4_1_3-5_3_2 | 0.0885589  | 0.0885542  | 0.429611 | 1.57039 |
| Atco_P8_P14_2_2_1-4_3_4  | 0.0884579  | 0.088567   | 0.361859 | 1.63814 |
| Atco_P11_P14_3_3_2-3_3_5 | 0.0885137  | 0.0885729  | 0.341675 | 1.65833 |
| Atco_P12_P14_4_4_1-3_3_5 | 0.0885646  | 0.0885917  | 0.369185 | 1.63082 |
| Atco_P10_P11_4_2_1-3_2_3 | 0.0886004  | 0.088457   | 0.331128 | 1.66887 |
| Atco_P13_P17_3_3_4-5_5_4 | 0.0885903  | 0.0886455  | 0.29516  | 1.70484 |
| Atco_P7_P8_1_1_2-2_1_2   | 0.0886636  | 0.0886976  | 0.583444 | 1.41656 |
| Atco_P10_P15_4_2_1-5_3_4 | 0.088711   | 0.0886574  | 0.417526 | 1.58247 |
| Atco_P14_P15_3_5_3-5_3_4 | 0.0887584  | 0.0887077  | 0.311493 | 1.68851 |
| Atco_P12_P12_1_4_4-5_2_2 | 0.088717   | 0.088831   | 0.306208 | 1.69379 |
| Atco_P13_P18_3_3_4-5_5_5 | 0.0888755  | 0.0888259  | 0.233612 | 1.76639 |
| Atco_P12_P15_4_4_1-4_3_5 | 0.0888581  | 0.0888895  | 0.289096 | 1.7109  |
| Atco_P12_P14_4_1_4-4_2_5 | 0.0888831  | 0.0889283  | 0.288486 | 1.71151 |
| Atco_P12_P13_2_3_4-4_2_4 | 0.0888741  | 0.0889652  | 0.298433 | 1.70157 |
| Atco_P11_P14_4_3_1-5_2_4 | 0.0889284  | 0.0889748  | 0.290241 | 1.70976 |
| Atco_P12_P13_4_2_3-2_4_4 | 0.0890126  | 0.0889759  | 0.270341 | 1.72966 |
| Atco_P6_P12_1_1_1-5_2_2  | 0.0890238  | 0.0890123  | 0.489658 | 1.51034 |
| Atco_P9_P13_3_1_2-2_3_5  | 0.0889896  | 0.0890978  | 0.490279 | 1.50972 |
| Atco_P8_P14_2_2_1-3_3_5  | 0.0877266  | 0.0891614  | 0.380067 | 1.61993 |
| Atco_P11_P15_3_2_3-4_5_3 | 0.0892113  | 0.0891646  | 0.297665 | 1.70234 |
| Atco_P13_P16_3_3_4-4_4_5 | 0.0887991  | 0.0892213  | 0.221054 | 1.77895 |
| Atco_P13_P17_5_3_2-5_5_4 | 0.0891643  | 0.0892551  | 0.174438 | 1.82556 |
| Atco_P16_P18_3_5_5-5_5_5 | 0.0892947  | 0.0892955  | 0.233833 | 1.76617 |
| Atco_P12_P15_4_1_4-5_2_5 | 0.0891389  | 0.0893512  | 0.257702 | 1.7423  |
| Atco_P12_P13_5_2_2-5_2_3 | 0.0893115  | 0.0893522  | 0.437612 | 1.56239 |
| Atco_P11_P13_1_3_4-5_2_3 | 0.0893324  | 0.089398   | 0.32578  | 1.67422 |
| Atco_P12_P12_3_4_2-4_2_3 | 0.0893418  | 0.0894291  | 0.293628 | 1.70637 |
| Atco_P9_P14_2_3_1-5_2_4  | 0.089283   | 0.0894431  | 0.30056  | 1.69944 |

| name                     | $\Delta_l$ | $\Delta_a$ | $c_l$    | $c_a$   |
|--------------------------|------------|------------|----------|---------|
| Atco_P10_P14_2_3_2-4_2_5 | 0.0894964  | 0.0894847  | 0.279505 | 1.72049 |
| Atco_P14_P15_4_3_4-3_4_5 | 0.0895735  | 0.0895733  | 0.223955 | 1.77605 |
| Atco_P14_P15_4_4_3-3_4_5 | 0.0893525  | 0.0896823  | 0.274771 | 1.72523 |
| Atco_P15_P16_3_4_5-5_5_3 | 0.0896762  | 0.0896891  | 0.259122 | 1.74088 |
| Atco_P12_P15_2_3_4-4_4_4 | 0.0894532  | 0.0896993  | 0.338124 | 1.66188 |
| Atco_P10_P17_2_2_3-5_4_5 | 0.0895691  | 0.0897055  | 0.26152  | 1.73848 |
| Atco_P11_P18_3_3_2-5_5_5 | 0.0897438  | 0.0896845  | 0.339743 | 1.66026 |
| Atco_P10_P15_3_1_3-5_2_5 | 0.0898582  | 0.0898382  | 0.209225 | 1.79078 |
| Atco_P7_P13_2_1_1-2_3_5  | 0.0898349  | 0.0898635  | 0.526864 | 1.47314 |
| Atco_P10_P12_2_1_4-4_2_3 | 0.0898743  | 0.0898905  | 0.509145 | 1.49086 |
| Atco_P12_P16_3_3_3-5_4_4 | 0.090054   | 0.0900807  | 0.329177 | 1.67082 |
| Atco_P11_P17_2_3_3-5_4_5 | 0.0900315  | 0.0901068  | 0.397558 | 1.60244 |
| Atco_P10_P14_3_2_2-4_4_3 | 0.0901515  | 0.090168   | 0.356983 | 1.64302 |
| Atco_P11_P15_4_1_3-5_2_5 | 0.0901353  | 0.0901837  | 0.211739 | 1.78826 |
| Atco_P13_P17_2_4_4-5_4_5 | 0.0900946  | 0.0901908  | 0.253395 | 1.7466  |
| Atco_P11_P15_4_3_1-3_4_5 | 0.090018   | 0.0902181  | 0.278972 | 1.72103 |
| Atco_P8_P12_2_1_2-4_1_4  | 0.0900868  | 0.0902371  | 0.196617 | 1.80338 |
| Atco_P14_P17_2_4_5-5_4_5 | 0.090243   | 0.0902996  | 0.207657 | 1.79234 |
| Atco_P12_P13_4_4_1-4_2_4 | 0.0903454  | 0.0903648  | 0.227135 | 1.77287 |
| Atco_P8_P15_3_1_1-5_3_4  | 0.0904654  | 0.090419   | 0.43654  | 1.56346 |
| Atco_P8_P11_1_2_2-4_2_2  | 0.0904108  | 0.0904713  | 0.452204 | 1.5478  |
| Atco_P12_P14_4_1_4-3_3_5 | 0.0903944  | 0.0905386  | 0.375689 | 1.62431 |
| Atco_P11_P17_2_2_4-5_4_5 | 0.0903207  | 0.0905601  | 0.284791 | 1.71521 |
| Atco_P11_P13_3_3_2-3_3_4 | 0.0905094  | 0.0905719  | 0.368333 | 1.63167 |
| Atco_P13_P16_3_4_3-4_4_5 | 0.090554   | 0.090609   | 0.295146 | 1.70485 |
| Atco_P9_P11_1_2_3-4_1_3  | 0.0905164  | 0.0906194  | 0.440583 | 1.55942 |
| Atco_P15_P15_3_4_5-4_3_5 | 0.0904444  | 0.0906575  | 0.316719 | 1.68328 |
| Atco_P9_P10_3_1_2-4_1_2  | 0.0906199  | 0.0906921  | 0.518757 | 1.48124 |
| Atco_P10_P15_2_1_4-5_3_4 | 0.0906922  | 0.0906467  | 0.428427 | 1.57157 |
| Atco_P6_P7_1_1_1-2_1_1   | 0.0908414  | 0.0908444  | 0.439431 | 1.56057 |
| Atco_P9_P15_2_2_2-4_4_4  | 0.090644   | 0.0908611  | 0.374295 | 1.6257  |
| Atco_P12_P17_3_4_2-5_4_5 | 0.0908985  | 0.09082    | 0.35163  | 1.64837 |
| Atco_P9_P13_2_3_1-4_2_4  | 0.0908963  | 0.0909019  | 0.444754 | 1.55525 |
| Atco_P11_P15_2_4_2-5_2_5 | 0.0909104  | 0.0908636  | 0.292678 | 1.70732 |
| Atco_P11_P14_3_2_3-3_3_5 | 0.0908839  | 0.0909109  | 0.349901 | 1.6501  |
| Atco_P12_P14_3_3_3-5_4_2 | 0.0909849  | 0.0909689  | 0.288446 | 1.71155 |
| Atco_P8_P12_1_2_2-4_1_4  | 0.0911404  | 0.0911305  | 0.452443 | 1.54756 |
| Atco_P10_P11_2_1_4-3_3_2 | 0.0911572  | 0.0844119  | 0.354813 | 1.64519 |
| Atco_P14_P15_4_5_2-5_3_4 | 0.0910491  | 0.0911741  | 0.265413 | 1.73459 |

| name                     | $\Delta_l$ | $\Delta_a$ | $c_l$    | $c_a$   |
|--------------------------|------------|------------|----------|---------|
| Atco_P10_P11_2_2_3-4_3_1 | 0.0909627  | 0.0911807  | 0.341295 | 1.6587  |
| Atco_P10_P13_1_3_3-5_2_3 | 0.0912077  | 0.0911816  | 0.238958 | 1.76104 |
| Atco_P15_P16_4_5_3-4_4_5 | 0.0911257  | 0.0912384  | 0.279616 | 1.72038 |
| Atco_P11_P14_2_2_4-4_2_5 | 0.09125    | 0.0912625  | 0.409939 | 1.59006 |
| Atco_P7_P11_1_1_2-4_3_1  | 0.0912485  | 0.0912729  | 0.43354  | 1.56646 |
| Atco_P11_P12_4_2_2-4_3_2 | 0.0913833  | 0.091373   | 0.341871 | 1.65813 |
| Atco_P8_P13_2_2_1-5_2_3  | 0.0914114  | 0.0913299  | 0.347695 | 1.65231 |
| Atco_P12_P15_2_2_5-5_3_4 | 0.091304   | 0.0914127  | 0.420896 | 1.5791  |
| Atco_P14_P16_3_4_4-4_4_5 | 0.0914527  | 0.0914717  | 0.250028 | 1.74997 |
| Atco_P9_P12_3_2_1-2_3_4  | 0.0914508  | 0.0914722  | 0.390093 | 1.60991 |
| Atco_P12_P14_4_2_3-2_4_5 | 0.0914889  | 0.0914328  | 0.349099 | 1.6509  |
| Atco_P7_P10_2_1_1-2_1_4  | 0.0915043  | 0.0915528  | 0.502242 | 1.49776 |
| Atco_P7_P15_1_2_1-5_2_5  | 0.0914918  | 0.0915638  | 0.353072 | 1.64693 |
| Atco_P11_P15_2_3_3-4_3_5 | 0.0915956  | 0.0915512  | 0.369429 | 1.63057 |
| Atco_P10_P12_3_1_3-4_1_4 | 0.0915562  | 0.0916133  | 0.251676 | 1.74832 |
| Atco_P11_P16_2_2_4-5_5_3 | 0.0916586  | 0.0915726  | 0.250639 | 1.74936 |
| Atco_P12_P12_3_2_4-3_4_2 | 0.0915796  | 0.0916718  | 0.346069 | 1.65393 |
| Atco_P13_P13_5_2_3-5_3_2 | 0.0916593  | 0.0916987  | 0.349196 | 1.6508  |
| Atco_P14_P15_3_4_4-3_4_5 | 0.0917131  | 0.0916822  | 0.273375 | 1.72663 |
| Atco_P9_P13_1_2_3-4_2_4  | 0.0915095  | 0.0917513  | 0.332827 | 1.66717 |
| Atco_P10_P15_3_2_2-5_4_3 | 0.0917199  | 0.0918353  | 0.226791 | 1.77321 |
| Atco_P14_P15_2_4_5-5_4_3 | 0.0917075  | 0.0919121  | 0.275095 | 1.72491 |
| Atco_P10_P11_2_3_2-4_2_2 | 0.0918651  | 0.0919213  | 0.383337 | 1.61666 |
| Atco_P7_P12_2_1_1-2_3_4  | 0.0919757  | 0.0919697  | 0.515695 | 1.48431 |
| Atco_P13_P16_4_3_3-3_5_5 | 0.0919783  | 0.0920943  | 0.26821  | 1.73179 |
| Atco_P13_P16_5_3_2-4_5_4 | 0.0920002  | 0.0921456  | 0.218777 | 1.78122 |
| Atco_P8_P13_1_2_2-4_2_4  | 0.0921539  | 0.0922435  | 0.382656 | 1.61734 |
| Atco_P9_P13_3_1_2-5_2_3  | 0.0922034  | 0.0922645  | 0.495023 | 1.50498 |
| Atco_P11_P16_4_2_2-5_5_3 | 0.0920319  | 0.0922656  | 0.32288  | 1.67712 |
| Atco_P16_P17_5_5_3-4_5_5 | 0.092225   | 0.0923252  | 0.238733 | 1.76127 |
| Atco_P9_P12_2_1_3-3_3_3  | 0.0923455  | 0.092334   | 0.389827 | 1.61017 |
| Atco_P11_P14_2_3_3-4_2_5 | 0.0923666  | 0.0924     | 0.300676 | 1.69932 |
| Atco_P10_P14_3_1_3-3_3_5 | 0.09224    | 0.0924125  | 0.415408 | 1.58459 |
| Atco_P9_P16_2_2_2-4_4_5  | 0.0924251  | 0.0924935  | 0.372687 | 1.62731 |
| Atco_P10_P11_4_2_1-1_3_4 | 0.0924764  | 0.092599   | 0.391124 | 1.60888 |
| Atco_P12_P12_2_4_3-4_2_3 | 0.0926023  | 0.0925997  | 0.319981 | 1.68002 |
| Atco_P9_P13_2_2_2-3_2_5  | 0.0926109  | 0.0925581  | 0.436668 | 1.56333 |
| Atco_P14_P18_4_4_3-5_5_5 | 0.0926242  | 0.092604   | 0.251608 | 1.74839 |
| Atco_P12_P14_3_3_3-4_4_3 | 0.092667   | 0.0926975  | 0.308855 | 1.69114 |

| name                     | $\Delta_l$ | $\Delta_a$ | $c_l$    | $c_a$   |
|--------------------------|------------|------------|----------|---------|
| Atco_P10_P11_1_2_4-4_2_2 | 0.0926813  | 0.0927726  | 0.379399 | 1.6206  |
| Atco_P12_P14_2_4_3-5_3_3 | 0.0927563  | 0.092808   | 0.342395 | 1.6576  |
| Atco_P9_P13_1_2_3-4_3_3  | 0.0926632  | 0.092854   | 0.358134 | 1.64187 |
| Atco_P14_P14_3_4_4-3_4_4 | 0.092715   | 0.0928771  | 0.281582 | 1.71842 |
| Atco_P14_P15_4_2_5-3_4_5 | 0.0928725  | 0.0929359  | 0.311045 | 1.68896 |
| Atco_P14_P17_4_4_3-4_5_5 | 0.092983   | 0.0928922  | 0.253872 | 1.74613 |
| Atco_P8_P10_3_1_1-3_1_3  | 0.0930051  | 0.0930202  | 0.5835   | 1.4165  |
| Atco_P11_P13_2_4_2-5_2_3 | 0.0930243  | 0.0930326  | 0.37498  | 1.62502 |
| Atco_P12_P18_3_3_3-5_5_5 | 0.0926371  | 0.0930375  | 0.328727 | 1.67127 |
| Atco_P12_P15_5_2_2-5_4_3 | 0.0928364  | 0.093039   | 0.278572 | 1.72143 |
| Atco_P12_P13_4_3_2-5_3_2 | 0.0929667  | 0.0930471  | 0.263357 | 1.73664 |
| Atco_P7_P12_1_1_2-4_1_4  | 0.0929623  | 0.0930543  | 0.295486 | 1.70451 |
| Atco_P11_P11_2_2_4-3_2_3 | 0.0930305  | 0.0931136  | 0.436995 | 1.56301 |
| Atco_P9_P13_2_1_3-4_2_4  | 0.0931341  | 0.0930411  | 0.432243 | 1.56776 |
| Atco_P11_P15_2_3_3-5_4_3 | 0.0931031  | 0.0931689  | 0.276155 | 1.72385 |
| Atco_P12_P13_3_2_4-3_3_4 | 0.0932324  | 0.0931875  | 0.490583 | 1.50942 |
| Atco_P10_P15_2_2_3-4_3_5 | 0.0933512  | 0.0933336  | 0.47403  | 1.52597 |
| Atco_P14_P14_3_4_4-5_4_2 | 0.0934413  | 0.0933029  | 0.277646 | 1.72235 |
| Atco_P15_P18_5_5_2-5_5_5 | 0.0934084  | 0.0934461  | 0.269688 | 1.73031 |
| Atco_P16_P16_4_5_4-5_4_4 | 0.093342   | 0.0935123  | 0.285076 | 1.71492 |
| Atco_P12_P13_4_2_3-2_3_5 | 0.0935221  | 0.09349    | 0.35523  | 1.64477 |
| Atco_P13_P18_3_4_3-5_5_5 | 0.0932917  | 0.0935267  | 0.272761 | 1.72724 |
| Atco_P7_P12_2_1_1-2_2_5  | 0.093479   | 0.0935807  | 0.415538 | 1.58446 |
| Atco_P13_P16_2_4_4-5_4_4 | 0.0936402  | 0.0935726  | 0.300904 | 1.6991  |
| Atco_P10_P11_3_1_3-3_1_4 | 0.093681   | 0.0937471  | 0.314367 | 1.68563 |
| Atco_P12_P16_2_3_4-4_4_5 | 0.0937262  | 0.0939051  | 0.344351 | 1.65565 |
| Atco_P14_P16_2_4_5-5_4_4 | 0.0938038  | 0.0939138  | 0.211236 | 1.78876 |
| Atco_P17_P17_4_5_5-5_5_4 | 0.0939131  | 0.0939287  | 0.263765 | 1.73623 |
| Atco_P13_P15_5_3_2-2_5_5 | 0.0939604  | 0.0940714  | 0.29218  | 1.70782 |
| Atco_P12_P16_2_2_5-5_4_4 | 0.0939817  | 0.0940847  | 0.263978 | 1.73602 |
| Atco_P14_P15_2_4_5-5_2_5 | 0.0940053  | 0.0941399  | 0.303427 | 1.69657 |
| Atco_P9_P12_1_2_3-4_2_3  | 0.0940867  | 0.094153   | 0.334666 | 1.66533 |
| Atco_P13_P15_2_3_5-4_4_4 | 0.0939017  | 0.094164   | 0.237061 | 1.76294 |
| Atco_P14_P17_4_5_2-5_4_5 | 0.0941506  | 0.0941877  | 0.324637 | 1.67536 |
| Atco_P14_P17_3_5_3-5_4_5 | 0.0941688  | 0.0942404  | 0.304292 | 1.69571 |
| Atco_P15_P17_3_5_4-5_4_5 | 0.0940505  | 0.094255   | 0.278156 | 1.72184 |
| Atco_P9_P11_3_1_2-4_2_2  | 0.0940785  | 0.0942591  | 0.446518 | 1.55348 |
| Atco_P12_P12_2_2_5-4_4_1 | 0.0942066  | 0.0943044  | 0.388903 | 1.6111  |
| Atco_P14_P15_5_4_2-5_4_3 | 0.0940455  | 0.0943865  | 0.195755 | 1.80425 |

| name                     | $\Delta_l$ | $\Delta_a$ | $c_l$    | $c_a$   |
|--------------------------|------------|------------|----------|---------|
| Atco_P9_P12_4_1_1-3_3_3  | 0.0943731  | 0.094388   | 0.369339 | 1.63066 |
| Atco_P6_P15_1_1_1-4_3_5  | 0.0944439  | 0.0943814  | 0.57418  | 1.42582 |
| Atco_P10_P14_3_3_1-3_3_5 | 0.0944842  | 0.0945126  | 0.441622 | 1.55838 |
| Atco_P12_P16_4_4_1-5_3_5 | 0.0944688  | 0.0945504  | 0.222331 | 1.77767 |
| Atco_P7_P10_2_1_1-3_2_2  | 0.0945216  | 0.0946135  | 0.405942 | 1.59406 |
| Atco_P13_P17_3_3_4-4_5_5 | 0.094558   | 0.094666   | 0.225345 | 1.77465 |
| Atco_P15_P16_5_5_2-5_4_4 | 0.0944667  | 0.0946941  | 0.21815  | 1.78185 |
| Atco_P13_P15_2_4_4-5_3_4 | 0.0946207  | 0.0946956  | 0.218822 | 1.78118 |
| Atco_P8_P15_3_1_1-5_2_5  | 0.0946974  | 0.0946903  | 0.80533  | 1.19467 |
| Atco_P12_P16_3_3_3-4_5_4 | 0.0945173  | 0.0946975  | 0.335241 | 1.66476 |
| Atco_P12_P14_3_2_4-3_4_4 | 0.0946032  | 0.094706   | 0.296666 | 1.70333 |
| Atco_P12_P15_2_4_3-5_3_4 | 0.0947279  | 0.094742   | 0.269254 | 1.73075 |
| Atco_P14_P17_5_4_2-5_5_4 | 0.0945279  | 0.0948119  | 0.242254 | 1.75775 |
| Atco_P14_P15_5_3_3-2_5_5 | 0.0946644  | 0.0948392  | 0.267162 | 1.73284 |
| Atco_P9_P17_2_2_2-5_5_4  | 0.0947344  | 0.0948409  | 0.307084 | 1.69292 |
| Atco_P15_P16_5_4_3-4_5_4 | 0.0948094  | 0.0948464  | 0.268407 | 1.73159 |
| Atco_P13_P13_3_4_3-5_3_2 | 0.0948531  | 0.0948825  | 0.274431 | 1.72557 |
| Atco_P13_P14_4_3_3-5_4_2 | 0.094792   | 0.0949207  | 0.225468 | 1.77453 |
| Atco_P9_P14_4_1_1-4_3_4  | 0.0949289  | 0.0949514  | 0.390964 | 1.60904 |
| Atco_P10_P11_3_2_2-2_3_3 | 0.0948819  | 0.0949915  | 0.347164 | 1.65284 |
| Atco_P9_P14_2_3_1-4_2_5  | 0.0948749  | 0.0950224  | 0.390074 | 1.60993 |
| Atco_P11_P15_3_3_2-5_4_3 | 0.0949836  | 0.0950818  | 0.286085 | 1.71392 |
| Atco_P13_P13_3_2_5-3_4_3 | 0.094841   | 0.0950977  | 0.270699 | 1.7293  |
| Atco_P9_P13_2_2_2-3_3_4  | 0.0950953  | 0.0951017  | 0.377767 | 1.62223 |
| Atco_P14_P16_4_4_3-5_5_3 | 0.0951627  | 0.0951706  | 0.292877 | 1.70712 |
| Atco_P8_P12_1_2_2-4_2_3  | 0.0951893  | 0.0951309  | 0.433509 | 1.56649 |
| Atco_P14_P15_2_4_5-5_3_4 | 0.0951542  | 0.0952474  | 0.216257 | 1.78374 |
| Atco_P8_P12_3_1_1-4_1_4  | 0.0952677  | 0.0952774  | 0.607856 | 1.39214 |
| Atco_P12_P16_4_3_2-3_5_5 | 0.0953113  | 0.0952533  | 0.307504 | 1.6925  |
| Atco_P9_P9_2_1_3-2_2_2   | 0.0953235  | 0.0953503  | 0.460725 | 1.53928 |
| Atco_P7_P13_1_1_2-4_2_4  | 0.0956515  | 0.0956469  | 0.962628 | 1.03737 |
| Atco_P12_P16_5_2_2-5_5_3 | 0.0954625  | 0.0956802  | 0.292914 | 1.70709 |
| Atco_P10_P13_3_2_2-5_3_2 | 0.0955762  | 0.0957042  | 0.242089 | 1.75791 |
| Atco_P11_P12_4_2_2-2_4_3 | 0.0956382  | 0.0957341  | 0.363468 | 1.63653 |
| Atco_P12_P17_2_2_5-5_5_4 | 0.0957586  | 0.0957148  | 0.242656 | 1.75734 |
| Atco_P10_P12_4_2_1-4_2_3 | 0.0956249  | 0.0957749  | 0.359881 | 1.64012 |
| Atco_P11_P13_2_2_4-4_4_2 | 0.0957804  | 0.0958097  | 0.321317 | 1.67868 |
| Atco_P7_P11_2_1_1-2_3_3  | 0.0959033  | 0.0959153  | 0.489057 | 1.51094 |
| Atco_P11_P13_4_2_2-4_4_2 | 0.0958959  | 0.0959246  | 0.277013 | 1.72299 |

| name                     | $\Delta_l$ | $\Delta_a$ | $c_l$    | $c_a$   |
|--------------------------|------------|------------|----------|---------|
| Atco_P11_P12_2_2_4-3_3_3 | 0.0958577  | 0.0959276  | 0.371684 | 1.62832 |
| Atco_P10_P11_2_2_3-3_3_2 | 0.0959155  | 0.09596    | 0.345401 | 1.6546  |
| Atco_P7_P13_1_2_1-5_2_3  | 0.0958549  | 0.0959677  | 0.430214 | 1.56979 |
| Atco_P11_P13_1_3_4-5_3_2 | 0.0959868  | 0.0960475  | 0.332619 | 1.66738 |
| Atco_P15_P17_5_4_3-5_5_4 | 0.0959643  | 0.0961     | 0.304314 | 1.69569 |
| Atco_P11_P12_4_3_1-2_3_4 | 0.0960521  | 0.096184   | 0.360193 | 1.63981 |
| Atco_P14_P15_3_3_5-4_5_3 | 0.0961903  | 0.0963463  | 0.252223 | 1.74778 |
| Atco_P14_P14_5_3_3-5_4_2 | 0.0963768  | 0.0963114  | 0.223126 | 1.77687 |
| Atco_P13_P13_2_3_5-4_3_3 | 0.0960704  | 0.0963986  | 0.271232 | 1.72877 |
| Atco_P12_P16_2_2_5-5_5_3 | 0.0965391  | 0.0910835  | 0.251189 | 1.74881 |
| Atco_P12_P14_3_4_2-4_3_4 | 0.0962249  | 0.0965503  | 0.366593 | 1.63341 |
| Atco_P8_P10_2_1_2-2_2_3  | 0.096564   | 0.0965048  | 0.478274 | 1.52173 |
| Atco_P7_P14_2_1_1-5_3_3  | 0.0965392  | 0.0966427  | 0.506204 | 1.4938  |
| Atco_P13_P14_3_2_5-4_3_4 | 0.0966814  | 0.0966187  | 0.477539 | 1.52246 |
| Atco_P9_P11_4_1_1-3_2_3  | 0.096778   | 0.0968351  | 0.469445 | 1.53055 |
| Atco_P11_P14_2_2_4-4_4_3 | 0.0968561  | 0.0967397  | 0.268949 | 1.73105 |
| Atco_P10_P12_4_2_1-3_3_3 | 0.0968313  | 0.0968563  | 0.321011 | 1.67899 |
| Atco_P12_P13_3_2_4-3_2_5 | 0.0967895  | 0.0968566  | 0.428116 | 1.57188 |
| Atco_P12_P14_3_4_2-5_3_3 | 0.0969119  | 0.0969057  | 0.305392 | 1.69461 |
| Atco_P9_P16_2_3_1-5_3_5  | 0.0966676  | 0.0969492  | 0.363785 | 1.63622 |
| Atco_P13_P15_4_4_2-4_4_4 | 0.0970159  | 0.0969873  | 0.295724 | 1.70428 |
| Atco_P14_P16_3_3_5-4_5_4 | 0.0970446  | 0.0970763  | 0.236771 | 1.76323 |
| Atco_P9_P12_3_1_2-2_2_5  | 0.0970113  | 0.0971021  | 0.481345 | 1.51866 |
| Atco_P12_P13_3_3_3-3_4_3 | 0.0970767  | 0.0971252  | 0.348215 | 1.65178 |
| Atco_P10_P14_3_3_1-4_3_4 | 0.097157   | 0.0971216  | 0.421721 | 1.57828 |
| Atco_P12_P13_2_4_3-4_2_4 | 0.0972017  | 0.0972413  | 0.270651 | 1.72935 |
| Atco_P13_P18_2_3_5-5_5_5 | 0.0971194  | 0.0972418  | 0.383633 | 1.61637 |
| Atco_P12_P13_2_2_5-4_4_2 | 0.0972252  | 0.0972861  | 0.321204 | 1.6788  |
| Atco_P14_P14_4_3_4-4_5_2 | 0.0973053  | 0.0972617  | 0.289671 | 1.71033 |
| Atco_P10_P14_2_3_2-4_3_4 | 0.0973062  | 0.0973486  | 0.340528 | 1.65947 |
| Atco_P11_P17_2_2_4-5_5_4 | 0.0973291  | 0.0974085  | 0.263471 | 1.73653 |
| Atco_P9_P14_1_2_3-4_3_4  | 0.0971609  | 0.0974249  | 0.432607 | 1.56739 |
| Atco_P11_P15_3_2_3-3_4_5 | 0.0973921  | 0.0974508  | 0.342942 | 1.65706 |
| Atco_P13_P16_3_2_5-4_4_5 | 0.097455   | 0.0974373  | 0.308036 | 1.69196 |
| Atco_P10_P12_3_2_2-2_3_4 | 0.0974805  | 0.0974199  | 0.343388 | 1.65661 |
| Atco_P14_P14_3_5_3-5_3_3 | 0.097517   | 0.0974896  | 0.323382 | 1.67662 |
| Atco_P13_P16_2_4_4-5_3_5 | 0.097517   | 0.0975649  | 0.208863 | 1.79114 |
| Atco_P10_P13_4_2_1-4_3_3 | 0.0975966  | 0.0975321  | 0.388927 | 1.61107 |
| Atco_P10_P12_4_1_2-4_2_3 | 0.0976253  | 0.0975794  | 0.492731 | 1.50727 |

| name                     | $\Delta_l$ | $\Delta_a$ | $c_l$    | $c_a$   |
|--------------------------|------------|------------|----------|---------|
| Atco_P16_P16_3_5_5-4_4_5 | 0.0976422  | 0.0973525  | 0.269151 | 1.73085 |
| Atco_P11_P12_2_2_4-4_4_1 | 0.0975489  | 0.0977025  | 0.388579 | 1.61142 |
| Atco_P8_P10_2_1_2-4_2_1  | 0.0976937  | 0.0977462  | 0.5449   | 1.4551  |
| Atco_P10_P11_3_3_1-2_2_4 | 0.0976567  | 0.0977522  | 0.456807 | 1.54319 |
| Atco_P12_P16_2_4_3-5_3_5 | 0.0974358  | 0.0978398  | 0.22541  | 1.77459 |
| Atco_P13_P14_3_3_4-3_4_4 | 0.0978267  | 0.0978428  | 0.244317 | 1.75568 |
| Atco_P9_P11_4_1_1-3_1_4  | 0.0977798  | 0.0978767  | 0.442562 | 1.55744 |
| Atco_P8_P12_3_1_1-4_2_3  | 0.0978843  | 0.0978463  | 0.525988 | 1.47401 |
| Atco_P10_P16_2_2_3-5_5_3 | 0.0978444  | 0.0979582  | 0.290123 | 1.70988 |
| Atco_P13_P13_2_4_4-4_2_4 | 0.097917   | 0.0979638  | 0.285174 | 1.71483 |
| Atco_P7_P13_1_1_2-4_3_3  | 0.0979086  | 0.0979683  | 0.390794 | 1.60921 |
| Atco_P15_P16_4_3_5-3_5_5 | 0.0979693  | 0.0979018  | 0.238044 | 1.76196 |
| Atco_P9_P10_3_2_1-3_2_2  | 0.0979882  | 0.0979453  | 0.289817 | 1.71018 |
| Atco_P8_P13_3_1_1-4_3_3  | 0.0979481  | 0.0980251  | 0.418441 | 1.58156 |
| Atco_P9_P12_3_2_1-3_3_3  | 0.0978305  | 0.098123   | 0.406381 | 1.59362 |
| Atco_P13_P14_4_4_2-5_3_3 | 0.0981337  | 0.0980684  | 0.249153 | 1.75085 |
| Atco_P11_P12_4_1_3-4_1_4 | 0.0981495  | 0.0981664  | 0.208995 | 1.791   |
| Atco_P12_P13_2_3_4-3_3_4 | 0.0980898  | 0.0982138  | 0.270486 | 1.72951 |
| Atco_P15_P16_4_4_4-5_5_3 | 0.0982734  | 0.09827    | 0.257251 | 1.74275 |
| Atco_P12_P17_2_3_4-5_5_4 | 0.0981569  | 0.0982769  | 0.349525 | 1.65048 |
| Atco_P14_P14_2_5_4-5_3_3 | 0.0983429  | 0.0983119  | 0.282388 | 1.71761 |
| Atco_P14_P17_3_4_4-5_5_4 | 0.0982239  | 0.0984097  | 0.259004 | 1.741   |
| Atco_P12_P13_3_4_2-3_2_5 | 0.0983899  | 0.0984293  | 0.296328 | 1.70367 |
| Atco_P10_P13_1_2_4-5_2_3 | 0.0983284  | 0.0984385  | 0.319273 | 1.68073 |
| Atco_P9_P9_1_2_3-3_1_2   | 0.0984374  | 0.0985647  | 0.493747 | 1.50625 |
| Atco_P13_P14_2_3_5-4_3_4 | 0.0985788  | 0.098624   | 0.283478 | 1.71652 |
| Atco_P15_P16_3_5_4-5_4_4 | 0.0985116  | 0.0986408  | 0.294641 | 1.70536 |
| Atco_P9_P16_4_1_1-5_3_5  | 0.0987395  | 0.09874    | 0.38421  | 1.61579 |
| Atco_P9_P12_2_1_3-4_1_4  | 0.0986948  | 0.0987554  | 0.27506  | 1.72494 |
| Atco_P8_P11_2_1_2-4_3_1  | 0.0987561  | 0.0987835  | 0.436503 | 1.5635  |
| Atco_P13_P15_2_3_5-5_2_5 | 0.0986955  | 0.0988266  | 0.317259 | 1.68274 |
| Atco_P10_P16_4_2_1-3_5_5 | 0.0988361  | 0.0988689  | 0.290481 | 1.70952 |
| Atco_P6_P13_1_1_1-5_3_2  | 0.0988781  | 0.0989032  | 0.349047 | 1.65095 |
| Atco_P11_P11_3_2_3-4_3_1 | 0.0987502  | 0.0989326  | 0.255173 | 1.74483 |
| Atco_P7_P13_2_1_1-5_2_3  | 0.0989458  | 0.0989788  | 0.490216 | 1.50978 |
| Atco_P9_P13_3_2_1-4_3_3  | 0.0990567  | 0.0990676  | 0.441818 | 1.55818 |
| Atco_P11_P12_3_4_1-3_2_4 | 0.0990662  | 0.099091   | 0.452754 | 1.54725 |
| Atco_P11_P13_3_1_4-3_3_4 | 0.0990277  | 0.0990991  | 0.435316 | 1.56468 |
| Atco_P14_P16_2_4_5-5_3_5 | 0.0989015  | 0.0991669  | 0.191527 | 1.80847 |



| name                     | $\Delta_l$ | $\Delta_a$ | $c_l$    | $c_a$   |
|--------------------------|------------|------------|----------|---------|
| Atco_P11_P11_3_3_2-3_3_2 | 0.0991825  | 0.0991737  | 0.351801 | 1.6482  |
| Atco_P13_P18_4_4_2-5_5_5 | 0.0991563  | 0.0992457  | 0.338605 | 1.6614  |
| Atco_P13_P15_3_5_2-5_3_4 | 0.0992471  | 0.0992316  | 0.353138 | 1.64686 |
| Atco_P11_P17_3_3_2-5_5_4 | 0.0992778  | 0.0993023  | 0.318876 | 1.68112 |
| Atco_P14_P16_4_3_4-3_5_5 | 0.099317   | 0.0992481  | 0.232447 | 1.76755 |
| Atco_P12_P13_2_2_5-4_3_3 | 0.0993375  | 0.0993057  | 0.32854  | 1.67146 |
| Atco_P13_P15_4_4_2-3_4_5 | 0.0991471  | 0.099348   | 0.328386 | 1.67161 |
| Atco_P11_P12_3_3_2-5_2_2 | 0.0993281  | 0.0993993  | 0.262813 | 1.73719 |
| Atco_P8_P15_1_2_2-5_3_4  | 0.099404   | 0.099447   | 0.475622 | 1.52438 |
| Atco_P16_P17_4_5_4-5_5_4 | 0.0992641  | 0.0994505  | 0.258383 | 1.74162 |
| Atco_P14_P16_5_4_2-3_5_5 | 0.0994548  | 0.0994896  | 0.271748 | 1.72825 |
| Atco_P11_P12_4_1_3-2_2_5 | 0.0994976  | 0.0994629  | 0.417008 | 1.58299 |
| Atco_P6_P12_1_1_1-4_3_2  | 0.0995316  | 0.0994564  | 0.349554 | 1.65045 |
| Atco_P13_P15_5_3_2-3_5_4 | 0.0995319  | 0.0995171  | 0.274734 | 1.72527 |
| Atco_P11_P15_4_3_1-4_4_4 | 0.0995161  | 0.0995535  | 0.268784 | 1.73122 |
| Atco_P15_P15_3_5_4-4_3_5 | 0.0772821  | 0.0996066  | 0.354813 | 1.64519 |
| Atco_P13_P16_3_4_3-5_4_4 | 0.0996097  | 0.0997922  | 0.294456 | 1.70554 |
| Atco_P14_P15_3_5_3-4_3_5 | 0.0997984  | 0.0998964  | 0.272893 | 1.72711 |

## 7 Near Miss Atid P-cages

| name                     | $\Delta_l$ | $\Delta_a$ | $c_l$    | $c_a$   |
|--------------------------|------------|------------|----------|---------|
| Atid_P13_P14_4_4_2-5_3_3 | 0.0047407  | 0.00474702 | 0.255423 | 1.74458 |
| Atid_P10_P13_4_2_1-3_4_3 | 0.00638853 | 0.0063932  | 0.468229 | 1.53177 |
| Atid_P13_P14_5_3_2-4_4_3 | 0.00645505 | 0.00646019 | 0.222044 | 1.77796 |
| Atid_P7_P13_2_1_1-4_4_2  | 0.00692518 | 0.00692406 | 0.352766 | 1.64723 |
| Atid_P13_P14_4_3_3-5_4_2 | 0.00758985 | 0.00758493 | 0.233342 | 1.76666 |
| Atid_P14_P15_5_3_3-5_5_2 | 0.0082323  | 0.00823301 | 0.246443 | 1.75356 |
| Atid_P9_P11_4_1_1-2_4_2  | 0.00857199 | 0.00859164 | 0.386909 | 1.61309 |
| Atid_P9_P11_3_1_2-3_4_1  | 0.00887014 | 0.00886222 | 0.412911 | 1.58709 |
| Atid_P12_P12_4_2_3-4_4_1 | 0.00891681 | 0.00891513 | 0.39902  | 1.60098 |
| Atid_P13_P14_5_2_3-4_5_2 | 0.00925122 | 0.00927055 | 0.223863 | 1.77614 |
| Atid_P11_P13_3_4_1-5_2_3 | 0.00989431 | 0.00989703 | 0.251455 | 1.74855 |
| Atid_P13_P17_5_3_2-5_5_4 | 0.0101583  | 0.0101673  | 0.191904 | 1.8081  |
| Atid_P14_P15_5_4_2-5_4_3 | 0.0104514  | 0.0104485  | 0.210638 | 1.78936 |
| Atid_P14_P16_5_3_3-5_5_3 | 0.0115776  | 0.0115834  | 0.253423 | 1.74658 |
| Atid_P8_P12_3_1_1-3_4_2  | 0.0117475  | 0.0117573  | 0.468803 | 1.5312  |
| Atid_P9_P14_3_2_1-4_4_3  | 0.0118351  | 0.0118345  | 0.450971 | 1.54903 |
| Atid_P10_P14_3_2_2-5_4_2 | 0.0120819  | 0.0120741  | 0.365064 | 1.63494 |
| Atid_P7_P15_2_1_1-5_5_2  | 0.0122361  | 0.0122391  | 0.352728 | 1.64727 |
| Atid_P10_P13_4_1_2-3_5_2 | 0.0127143  | 0.0127384  | 0.275442 | 1.72456 |
| Atid_P9_P11_3_2_1-3_3_2  | 0.0129465  | 0.01295    | 0.439869 | 1.56013 |
| Atid_P10_P14_3_3_1-5_3_3 | 0.0130858  | 0.0130911  | 0.253111 | 1.74689 |
| Atid_P7_P10_2_1_1-3_3_1  | 0.0145719  | 0.0145724  | 0.400556 | 1.59944 |
| Atid_P12_P15_4_2_3-5_5_2 | 0.0154502  | 0.0154751  | 0.200838 | 1.79916 |
| Atid_P10_P10_2_3_2-4_2_1 | 0.0159363  | 0.0159669  | 0.452874 | 1.54713 |
| Atid_P10_P15_3_2_2-5_5_2 | 0.0161133  | 0.0161145  | 0.40082  | 1.59918 |
| Atid_P10_P10_3_2_2-3_3_1 | 0.0166552  | 0.0166512  | 0.4804   | 1.5196  |
| Atid_P8_P13_2_2_1-5_3_2  | 0.0173782  | 0.0173827  | 0.25709  | 1.74291 |
| Atid_P8_P11_2_2_1-4_2_2  | 0.0181466  | 0.0181575  | 0.503521 | 1.49648 |
| Atid_P12_P14_5_2_2-3_5_3 | 0.0182344  | 0.0182422  | 0.333515 | 1.66649 |
| Atid_P8_P15_3_1_1-4_5_3  | 0.0182483  | 0.0182701  | 0.419288 | 1.58071 |
| Atid_P7_P16_2_1_1-5_5_3  | 0.0185376  | 0.0185522  | 0.27968  | 1.72032 |
| Atid_P9_P14_4_1_1-3_5_3  | 0.018649   | 0.0186458  | 0.372026 | 1.62797 |
| Atid_P9_P13_2_3_1-5_2_3  | 0.0193445  | 0.0193342  | 0.307053 | 1.69295 |
| Atid_P10_P12_3_3_1-4_2_3 | 0.0194406  | 0.0194583  | 0.256611 | 1.74339 |
| Atid_P9_P13_4_1_1-2_5_3  | 0.0194878  | 0.0195201  | 0.402944 | 1.59706 |

| name                     | $\Delta_l$ | $\Delta_a$ | $c_l$    | $c_a$   |
|--------------------------|------------|------------|----------|---------|
| Atid_P11_P15_4_2_2-4_5_3 | 0.019518   | 0.0195379  | 0.336446 | 1.66355 |
| Atid_P10_P10_2_4_1-4_1_2 | 0.0195942  | 0.0195971  | 0.451911 | 1.54809 |
| Atid_P9_P11_2_2_2-4_3_1  | 0.0211662  | 0.0211415  | 0.44649  | 1.55351 |
| Atid_P14_P14_4_4_3-5_4_2 | 0.0217354  | 0.0217422  | 0.321968 | 1.67803 |
| Atid_P9_P12_2_3_1-5_2_2  | 0.0218898  | 0.0218798  | 0.28143  | 1.71857 |
| Atid_P7_P8_2_1_1-2_2_1   | 0.0157453  | 0.0227526  | 0.707946 | 1.29205 |
| Atid_P9_P10_2_3_1-4_1_2  | 0.0229133  | 0.0228812  | 0.464455 | 1.53555 |
| Atid_P10_P12_2_3_2-5_2_2 | 0.022958   | 0.0229528  | 0.354736 | 1.64526 |
| Atid_P14_P14_5_3_3-5_4_2 | 0.0229853  | 0.0230251  | 0.33137  | 1.66863 |
| Atid_P8_P14_3_1_1-3_5_3  | 0.0232295  | 0.0232288  | 0.359977 | 1.64002 |
| Atid_P13_P16_5_3_2-4_5_4 | 0.0234373  | 0.0234833  | 0.316573 | 1.68343 |
| Atid_P10_P11_3_2_2-4_3_1 | 0.0235558  | 0.0235519  | 0.450174 | 1.54983 |
| Atid_P15_P16_5_5_2-5_4_4 | 0.0236276  | 0.0236156  | 0.306033 | 1.69397 |
| Atid_P12_P13_3_4_2-5_2_3 | 0.0237716  | 0.0237805  | 0.296565 | 1.70344 |
| Atid_P8_P9_3_1_1-2_3_1   | 0.0237844  | 0.0237914  | 0.30903  | 1.69097 |
| Atid_P10_P13_3_2_2-4_4_2 | 0.023863   | 0.0238888  | 0.30786  | 1.69214 |
| Atid_P11_P15_4_2_2-5_5_2 | 0.0238562  | 0.0238942  | 0.346005 | 1.654   |
| Atid_P12_P14_5_2_2-4_5_2 | 0.0239878  | 0.0240036  | 0.326357 | 1.67364 |
| Atid_P7_P9_1_2_1-4_1_1   | 0.0244457  | 0.0244379  | 0.47107  | 1.52893 |
| Atid_P10_P14_4_2_1-4_4_3 | 0.0244618  | 0.0244946  | 0.451743 | 1.54826 |
| Atid_P11_P11_3_3_2-4_2_2 | 0.0245645  | 0.0245506  | 0.290838 | 1.70916 |
| Atid_P6_P11_1_1_1-4_3_1  | 0.024736   | 0.0247369  | 0.564185 | 1.43581 |
| Atid_P7_P12_1_2_1-5_2_2  | 0.0250688  | 0.0251018  | 0.396789 | 1.60321 |
| Atid_P8_P12_2_2_1-4_3_2  | 0.0251234  | 0.0251355  | 0.523158 | 1.47684 |
| Atid_P12_P13_4_4_1-4_3_3 | 0.0253569  | 0.0254057  | 0.369495 | 1.6305  |
| Atid_P14_P15_5_4_2-5_3_4 | 0.0254626  | 0.0254578  | 0.234483 | 1.76552 |
| Atid_P11_P12_3_4_1-4_2_3 | 0.0254907  | 0.025485   | 0.40574  | 1.59426 |
| Atid_P9_P14_3_1_2-4_5_2  | 0.0258165  | 0.0258379  | 0.331138 | 1.66886 |
| Atid_P12_P13_4_3_2-4_4_2 | 0.0259663  | 0.0259716  | 0.331628 | 1.66837 |
| Atid_P11_P12_2_4_2-5_2_2 | 0.0261901  | 0.0262041  | 0.409431 | 1.59057 |
| Atid_P13_P13_3_4_3-5_3_2 | 0.0267045  | 0.0267153  | 0.343925 | 1.65607 |
| Atid_P13_P15_4_4_2-5_3_4 | 0.0268578  | 0.0268739  | 0.270925 | 1.72908 |
| Atid_P12_P17_4_3_2-5_5_4 | 0.0268618  | 0.0269018  | 0.322117 | 1.67788 |
| Atid_P10_P16_3_2_2-5_5_3 | 0.0269307  | 0.0269304  | 0.357399 | 1.6426  |
| Atid_P10_P15_4_2_1-4_5_3 | 0.0269341  | 0.0269498  | 0.223348 | 1.77665 |
| Atid_P13_P15_5_2_3-5_5_2 | 0.0269666  | 0.0270022  | 0.331267 | 1.66873 |
| Atid_P13_P13_4_3_3-4_4_2 | 0.0271953  | 0.0272679  | 0.308597 | 1.6914  |
| Atid_P10_P11_3_3_1-4_2_2 | 0.0273177  | 0.0272892  | 0.344345 | 1.65565 |
| Atid_P13_P13_3_5_2-5_2_3 | 0.0273752  | 0.0274048  | 0.34731  | 1.65269 |

| name                     | $\Delta_l$ | $\Delta_a$ | $c_l$    | $c_a$   |
|--------------------------|------------|------------|----------|---------|
| Atid_P15_P15_5_4_3-5_5_2 | 0.0274272  | 0.0274087  | 0.256294 | 1.74371 |
| Atid_P10_P12_3_2_2-4_4_1 | 0.0280518  | 0.0280965  | 0.238887 | 1.76111 |
| Atid_P7_P8_1_2_1-3_1_1   | 0.0284476  | 0.0284556  | 0.534641 | 1.46536 |
| Atid_P14_P15_5_4_2-4_4_4 | 0.0284919  | 0.0285207  | 0.292701 | 1.7073  |
| Atid_P13_P15_5_2_3-4_5_3 | 0.0285793  | 0.0285836  | 0.251243 | 1.74876 |
| Atid_P9_P10_2_2_2-4_2_1  | 0.0287855  | 0.0287929  | 0.390483 | 1.60952 |
| Atid_P10_P11_4_1_2-3_4_1 | 0.029115   | 0.0291315  | 0.444153 | 1.55585 |
| Atid_P14_P15_5_3_3-4_5_3 | 0.0291379  | 0.0291655  | 0.289389 | 1.71061 |
| Atid_P14_P17_5_4_2-5_4_5 | 0.0293023  | 0.0293024  | 0.234294 | 1.76571 |
| Atid_P12_P13_4_2_3-4_4_2 | 0.0293063  | 0.0293054  | 0.258605 | 1.74139 |
| Atid_P10_P14_4_2_1-3_5_3 | 0.029344   | 0.0293609  | 0.391314 | 1.60869 |
| Atid_P9_P11_2_3_1-4_2_2  | 0.0300004  | 0.0300169  | 0.51274  | 1.48726 |
| Atid_P14_P14_4_3_4-5_4_2 | 0.030127   | 0.0301307  | 0.286637 | 1.71336 |
| Atid_P8_P12_2_1_2-4_4_1  | 0.0301924  | 0.0302336  | 0.372556 | 1.62744 |
| Atid_P10_P11_4_2_1-3_3_2 | 0.0302466  | 0.0302255  | 0.449184 | 1.55082 |
| Atid_P14_P17_5_3_3-5_5_4 | 0.0303449  | 0.030338   | 0.242185 | 1.75782 |
| Atid_P11_P14_4_2_2-4_4_3 | 0.0308064  | 0.0308359  | 0.220493 | 1.77951 |
| Atid_P12_P14_4_4_1-5_3_3 | 0.0306317  | 0.0309682  | 0.222803 | 1.7772  |
| Atid_P14_P15_5_2_4-5_5_2 | 0.0310981  | 0.0311307  | 0.218949 | 1.78105 |
| Atid_P12_P14_3_4_2-5_3_3 | 0.0311261  | 0.0311359  | 0.322119 | 1.67788 |
| Atid_P9_P12_3_1_2-4_4_1  | 0.0311341  | 0.0311863  | 0.44049  | 1.55951 |
| Atid_P15_P16_5_3_4-5_5_3 | 0.0316276  | 0.0316532  | 0.260753 | 1.73925 |
| Atid_P8_P10_3_1_1-2_3_2  | 0.0316313  | 0.0316943  | 0.362447 | 1.63755 |
| Atid_P8_P15_2_2_1-5_4_3  | 0.031825   | 0.0318362  | 0.529774 | 1.47023 |
| Atid_P8_P14_3_1_1-4_5_2  | 0.0319157  | 0.0319146  | 0.335713 | 1.66429 |
| Atid_P12_P14_3_3_3-5_4_2 | 0.0319987  | 0.032035   | 0.290087 | 1.70991 |
| Atid_P7_P14_2_1_1-5_4_2  | 0.0321162  | 0.0321546  | 0.598843 | 1.40116 |
| Atid_P7_P14_2_1_1-4_5_2  | 0.0321826  | 0.0321708  | 0.549163 | 1.45084 |
| Atid_P9_P12_4_1_1-2_5_2  | 0.0325398  | 0.0324914  | 0.367938 | 1.63206 |
| Atid_P12_P16_5_2_2-4_5_4 | 0.032538   | 0.0325456  | 0.217882 | 1.78212 |
| Atid_P12_P13_4_4_1-5_2_3 | 0.0329718  | 0.0330164  | 0.399639 | 1.60036 |
| Atid_P16_P16_5_4_4-5_5_3 | 0.0332512  | 0.0333528  | 0.227902 | 1.7721  |
| Atid_P8_P11_3_1_1-2_4_2  | 0.0336949  | 0.0337446  | 0.497069 | 1.50293 |
| Atid_P15_P17_5_5_2-5_4_5 | 0.0340626  | 0.028948   | 0.218776 | 1.78122 |
| Atid_P10_P13_3_3_1-5_2_3 | 0.0340027  | 0.0340964  | 0.439566 | 1.56043 |
| Atid_P14_P15_4_3_4-5_5_2 | 0.0340812  | 0.0341791  | 0.270922 | 1.72908 |
| Atid_P14_P14_4_5_2-5_2_4 | 0.0343885  | 0.0286582  | 0.234423 | 1.76558 |
| Atid_P11_P17_4_2_2-5_5_4 | 0.0343664  | 0.0344057  | 0.221726 | 1.77827 |
| Atid_P8_P14_2_2_1-5_4_2  | 0.0347138  | 0.0346285  | 0.339894 | 1.66011 |

| name                     | $\Delta_l$ | $\Delta_a$ | $c_l$    | $c_a$   |
|--------------------------|------------|------------|----------|---------|
| Atid_P7_P11_2_1_1-3_3_2  | 0.0311266  | 0.0348922  | 0.501187 | 1.49881 |
| Atid_P12_P14_4_2_3-5_4_2 | 0.0350085  | 0.0350231  | 0.280854 | 1.71915 |
| Atid_P9_P9_1_3_2-4_1_1   | 0.0350873  | 0.0351388  | 0.365385 | 1.63461 |
| Atid_P12_P15_5_2_2-3_5_4 | 0.0352266  | 0.0352255  | 0.291098 | 1.7089  |
| Atid_P13_P16_5_2_3-5_5_3 | 0.0353293  | 0.0353823  | 0.217304 | 1.7827  |
| Atid_P9_P10_3_1_2-3_3_1  | 0.035618   | 0.0356234  | 0.457067 | 1.54293 |
| Atid_P11_P14_3_2_3-5_4_2 | 0.0356102  | 0.0356252  | 0.332537 | 1.66746 |
| Atid_P14_P15_5_3_3-5_4_3 | 0.0358254  | 0.0358815  | 0.486318 | 1.51368 |
| Atid_P9_P14_2_2_2-5_4_2  | 0.035974   | 0.0360295  | 0.338671 | 1.66133 |
| Atid_P10_P12_4_1_2-3_4_2 | 0.0360763  | 0.0361287  | 0.349235 | 1.65077 |
| Atid_P11_P11_3_4_1-4_2_2 | 0.0360964  | 0.0361478  | 0.25662  | 1.74338 |
| Atid_P12_P14_5_2_2-4_4_3 | 0.0361692  | 0.0362149  | 0.312655 | 1.68734 |
| Atid_P9_P12_3_2_1-3_3_3  | 0.0362683  | 0.0362754  | 0.330543 | 1.66946 |
| Atid_P13_P15_4_2_4-5_5_2 | 0.0362945  | 0.0364618  | 0.318961 | 1.68104 |
| Atid_P9_P12_4_1_1-2_4_3  | 0.036543   | 0.0365606  | 0.323925 | 1.67608 |
| Atid_P12_P17_5_2_2-5_5_4 | 0.0367638  | 0.0367663  | 0.258091 | 1.74191 |
| Atid_P6_P10_1_1_1-4_2_1  | 0.0367718  | 0.036769   | 0.45425  | 1.54575 |
| Atid_P8_P9_1_3_1-4_1_1   | 0.0368761  | 0.0368601  | 0.494449 | 1.50555 |
| Atid_P11_P14_3_4_1-5_3_3 | 0.0369612  | 0.0369257  | 0.424878 | 1.57512 |
| Atid_P9_P13_4_1_1-3_5_2  | 0.037423   | 0.0374354  | 0.30689  | 1.69311 |
| Atid_P10_P11_4_1_2-2_4_2 | 0.037571   | 0.037622   | 0.401819 | 1.59818 |
| Atid_P10_P14_4_1_2-3_5_3 | 0.0379642  | 0.0379865  | 0.29122  | 1.70878 |
| Atid_P7_P15_2_1_1-4_5_3  | 0.0380262  | 0.038017   | 0.472169 | 1.52783 |
| Atid_P9_P9_2_2_2-3_2_1   | 0.0381099  | 0.0381107  | 0.39944  | 1.60056 |
| Atid_P9_P13_3_2_1-4_4_2  | 0.0381721  | 0.038182   | 0.216246 | 1.78375 |
| Atid_P11_P15_3_2_3-5_5_2 | 0.0386506  | 0.0386737  | 0.304152 | 1.69585 |
| Atid_P11_P13_4_2_2-3_4_3 | 0.0387632  | 0.038764   | 0.3426   | 1.6574  |
| Atid_P10_P12_4_2_1-3_4_2 | 0.0387969  | 0.0388457  | 0.225025 | 1.77498 |
| Atid_P11_P16_4_2_2-4_5_4 | 0.0389256  | 0.0389464  | 0.330151 | 1.66985 |
| Atid_P13_P17_5_3_2-4_5_5 | 0.0391457  | 0.039155   | 0.2513   | 1.7487  |
| Atid_P8_P10_2_2_1-3_2_2  | 0.0391088  | 0.0391595  | 0.40183  | 1.59817 |
| Atid_P7_P12_2_1_1-4_4_1  | 0.0392888  | 0.0392884  | 0.350214 | 1.64979 |
| Atid_P10_P16_4_2_1-5_5_3 | 0.0393093  | 0.0393645  | 0.3176   | 1.6824  |
| Atid_P10_P14_3_2_2-4_5_2 | 0.0394046  | 0.0394256  | 0.383215 | 1.61678 |
| Atid_P11_P15_4_2_2-5_4_3 | 0.0394503  | 0.0395138  | 0.296779 | 1.70322 |
| Atid_P9_P10_4_1_1-2_3_2  | 0.0396951  | 0.0397092  | 0.424865 | 1.57514 |
| Atid_P11_P14_4_3_1-5_3_3 | 0.0396507  | 0.0397288  | 0.368749 | 1.63125 |
| Atid_P9_P9_2_3_1-3_1_2   | 0.0398065  | 0.0398639  | 0.415514 | 1.58449 |
| Atid_P15_P18_5_5_2-5_5_5 | 0.0401396  | 0.0401731  | 0.294446 | 1.70555 |

| name                     | $\Delta_l$ | $\Delta_a$ | $c_l$    | $c_a$   |
|--------------------------|------------|------------|----------|---------|
| Atid_P7_P10_1_2_1-4_2_1  | 0.0403725  | 0.0403981  | 0.468872 | 1.53113 |
| Atid_P10_P12_4_1_2-2_5_2 | 0.0403861  | 0.0404259  | 0.46256  | 1.53744 |
| Atid_P8_P13_3_1_1-3_4_3  | 0.0405395  | 0.0405627  | 0.309159 | 1.69084 |
| Atid_P13_P18_5_3_2-5_5_5 | 0.0406618  | 0.0259941  | 0.134896 | 1.8651  |
| Atid_P10_P11_3_2_2-3_3_2 | 0.0413029  | 0.0413061  | 0.388752 | 1.61125 |
| Atid_P10_P12_4_2_1-2_4_3 | 0.041459   | 0.0414561  | 0.493802 | 1.5062  |
| Atid_P12_P15_4_3_2-4_5_3 | 0.0414104  | 0.0414975  | 0.371384 | 1.62862 |
| Atid_P13_P14_5_3_2-3_5_3 | 0.0416803  | 0.0416734  | 0.378625 | 1.62137 |
| Atid_P9_P13_3_1_2-3_5_2  | 0.0417749  | 0.0417585  | 0.477854 | 1.52215 |
| Atid_P7_P14_2_1_1-4_4_3  | 0.0417308  | 0.0417858  | 0.326423 | 1.67358 |
| Atid_P7_P12_2_1_1-3_4_2  | 0.0420879  | 0.0421241  | 0.459089 | 1.54091 |
| Atid_P10_P12_3_2_2-4_3_2 | 0.04206    | 0.0422358  | 0.477921 | 1.52208 |
| Atid_P11_P12_4_3_1-4_2_3 | 0.0422229  | 0.0422579  | 0.427691 | 1.57231 |
| Atid_P9_P14_2_3_1-5_3_3  | 0.0422702  | 0.0422944  | 0.429471 | 1.57053 |
| Atid_P11_P14_4_2_2-3_5_3 | 0.042458   | 0.0423832  | 0.398509 | 1.60149 |
| Atid_P7_P12_2_1_1-4_3_2  | 0.0424476  | 0.0424911  | 0.499359 | 1.50064 |
| Atid_P15_P15_5_3_4-5_4_3 | 0.0429961  | 0.0429605  | 0.215646 | 1.78435 |
| Atid_P9_P13_3_2_1-3_4_3  | 0.0430798  | 0.0430956  | 0.506445 | 1.49356 |
| Atid_P13_P14_5_3_2-4_3_4 | 0.0432135  | 0.0431894  | 0.234423 | 1.76558 |
| Atid_P10_P13_2_4_1-5_2_3 | 0.0431618  | 0.04323    | 0.409974 | 1.59003 |
| Atid_P10_P13_3_2_2-5_3_2 | 0.0432502  | 0.0432257  | 0.384248 | 1.61575 |
| Atid_P12_P15_4_3_2-4_4_4 | 0.043322   | 0.0433455  | 0.276679 | 1.72332 |
| Atid_P8_P16_3_1_1-5_5_3  | 0.0433518  | 0.0433974  | 0.423264 | 1.57674 |
| Atid_P12_P12_2_4_3-5_2_2 | 0.043527   | 0.0435896  | 0.325076 | 1.67492 |
| Atid_P11_P14_4_1_3-4_5_2 | 0.0435927  | 0.0435909  | 0.21558  | 1.78442 |
| Atid_P13_P14_4_3_3-4_5_2 | 0.0436196  | 0.0436723  | 0.330956 | 1.66904 |
| Atid_P15_P15_4_4_4-5_5_2 | 0.0437225  | 0.043737   | 0.296656 | 1.70334 |
| Atid_P14_P15_5_4_2-5_5_2 | 0.0438167  | 0.0439434  | 0.204174 | 1.79583 |
| Atid_P13_P14_5_2_3-3_5_3 | 0.0439983  | 0.0439946  | 0.326767 | 1.67323 |
| Atid_P13_P14_4_4_2-5_2_4 | 0.0439053  | 0.0440298  | 0.218789 | 1.78121 |
| Atid_P8_P15_2_1_2-5_5_2  | 0.0442488  | 0.0443093  | 0.355512 | 1.64449 |
| Atid_P13_P14_5_3_2-3_4_4 | 0.044552   | 0.0445816  | 0.261811 | 1.73819 |
| Atid_P10_P11_2_3_2-4_2_2 | 0.0448734  | 0.044867   | 0.366283 | 1.63372 |
| Atid_P13_P14_5_2_3-4_4_3 | 0.0449584  | 0.04501    | 0.232096 | 1.7679  |
| Atid_P12_P13_5_2_2-2_5_3 | 0.0450119  | 0.0450044  | 0.409235 | 1.59076 |
| Atid_P13_P14_4_3_3-4_4_3 | 0.0450337  | 0.0450333  | 0.286974 | 1.71303 |
| Atid_P12_P15_5_2_2-5_5_2 | 0.0450142  | 0.0450391  | 0.392939 | 1.60706 |
| Atid_P16_P17_5_5_3-5_4_5 | 0.045026   | 0.0450545  | 0.233162 | 1.76684 |
| Atid_P10_P17_3_2_2-5_5_4 | 0.0450276  | 0.0450625  | 0.379578 | 1.62042 |

| name                     | $\Delta_l$ | $\Delta_a$ | $c_l$    | $c_a$   |
|--------------------------|------------|------------|----------|---------|
| Atid_P11_P13_4_3_1-3_4_3 | 0.0452542  | 0.0452615  | 0.404529 | 1.59547 |
| Atid_P11_P12_4_2_2-4_4_1 | 0.0454426  | 0.0454672  | 0.277328 | 1.72267 |
| Atid_P6_P9_1_1_1-3_2_1   | 0.0454787  | 0.0454863  | 0.326036 | 1.67396 |
| Atid_P11_P13_3_3_2-5_2_3 | 0.0455513  | 0.0455905  | 0.30541  | 1.69459 |
| Atid_P9_P13_4_1_1-3_4_3  | 0.0455591  | 0.0456097  | 0.369547 | 1.63045 |
| Atid_P8_P11_2_1_2-4_3_1  | 0.0457057  | 0.0457196  | 0.320651 | 1.67935 |
| Atid_P8_P11_3_1_1-3_3_2  | 0.0457319  | 0.0457501  | 0.441137 | 1.55886 |
| Atid_P11_P13_4_1_3-3_5_2 | 0.0456601  | 0.0457788  | 0.38806  | 1.61194 |
| Atid_P13_P17_5_2_3-5_5_4 | 0.0458759  | 0.0458595  | 0.214694 | 1.78531 |
| Atid_P10_P14_3_2_2-4_4_3 | 0.0459126  | 0.0458447  | 0.384177 | 1.61582 |
| Atid_P13_P15_5_3_2-3_5_4 | 0.0457151  | 0.0459278  | 0.353395 | 1.6466  |
| Atid_P13_P14_4_4_2-4_3_4 | 0.0460506  | 0.0461641  | 0.277291 | 1.72271 |
| Atid_P11_P14_4_2_2-5_4_2 | 0.046269   | 0.0461942  | 0.493954 | 1.50605 |
| Atid_P7_P9_2_1_1-3_2_1   | 0.0462938  | 0.0463833  | 0.610168 | 1.38983 |
| Atid_P10_P15_4_1_2-4_5_3 | 0.0464228  | 0.0464301  | 0.272672 | 1.72733 |
| Atid_P8_P13_2_2_1-4_3_3  | 0.046456   | 0.0464616  | 0.351428 | 1.64857 |
| Atid_P12_P16_4_3_2-4_5_4 | 0.0466824  | 0.0467921  | 0.369276 | 1.63072 |
| Atid_P8_P13_2_2_1-5_2_3  | 0.0467443  | 0.0467924  | 0.397278 | 1.60272 |
| Atid_P10_P13_2_3_2-5_3_2 | 0.0468538  | 0.0311352  | 0.218776 | 1.78122 |
| Atid_P15_P15_4_5_3-5_4_3 | 0.0467712  | 0.0469346  | 0.285055 | 1.71495 |
| Atid_P14_P15_4_5_2-5_4_3 | 0.0469725  | 0.0470022  | 0.337901 | 1.6621  |
| Atid_P9_P12_3_2_1-3_4_2  | 0.0470102  | 0.0471471  | 0.459847 | 1.54015 |
| Atid_P12_P15_4_2_3-4_5_3 | 0.0471151  | 0.0472038  | 0.332349 | 1.66765 |
| Atid_P13_P17_4_3_3-5_5_4 | 0.0472606  | 0.0472704  | 0.291088 | 1.70891 |
| Atid_P10_P11_4_2_1-2_4_2 | 0.0473828  | 0.0474486  | 0.428347 | 1.57165 |
| Atid_P8_P12_2_2_1-5_2_2  | 0.047441   | 0.0475116  | 0.467131 | 1.53287 |
| Atid_P10_P12_2_4_1-5_2_2 | 0.0475415  | 0.0475582  | 0.363092 | 1.63691 |
| Atid_P9_P12_4_1_1-3_4_2  | 0.0476781  | 0.0476568  | 0.426582 | 1.57342 |
| Atid_P9_P13_2_3_1-5_3_2  | 0.0477763  | 0.0477489  | 0.390708 | 1.60929 |
| Atid_P9_P10_4_1_1-1_4_2  | 0.0478653  | 0.0478557  | 0.425922 | 1.57408 |
| Atid_P9_P12_2_3_1-4_2_3  | 0.0479418  | 0.0479643  | 0.357294 | 1.64271 |
| Atid_P12_P12_3_4_2-4_2_3 | 0.0479567  | 0.0480554  | 0.334018 | 1.66598 |
| Atid_P12_P12_2_5_2-5_2_2 | 0.0480972  | 0.0481722  | 0.367912 | 1.63209 |
| Atid_P9_P14_3_2_1-5_4_2  | 0.0482257  | 0.0482263  | 0.32315  | 1.67685 |
| Atid_P11_P12_3_4_1-5_2_2 | 0.0481689  | 0.0482639  | 0.226473 | 1.77353 |
| Atid_P6_P14_1_1_1-5_4_2  | 0.048308   | 0.035309   | 0.30903  | 1.69097 |
| Atid_P8_P14_3_1_1-4_4_3  | 0.0482728  | 0.0483649  | 0.42161  | 1.57839 |
| Atid_P9_P13_3_1_2-4_4_2  | 0.04823    | 0.0483804  | 0.217533 | 1.78247 |
| Atid_P13_P16_5_2_3-4_5_4 | 0.0483771  | 0.0484123  | 0.247765 | 1.75224 |

| name                     | $\Delta_l$ | $\Delta_a$ | $c_l$    | $c_a$   |
|--------------------------|------------|------------|----------|---------|
| Atid_P12_P15_3_3_3-5_5_2 | 0.0483762  | 0.0484571  | 0.304075 | 1.69593 |
| Atid_P13_P13_3_4_3-5_2_3 | 0.0487462  | 0.048739   | 0.283082 | 1.71692 |
| Atid_P8_P10_1_3_1-4_1_2  | 0.0487854  | 0.0487749  | 0.504099 | 1.4959  |
| Atid_P9_P16_3_1_2-5_5_3  | 0.0487538  | 0.0488138  | 0.351965 | 1.64803 |
| Atid_P14_P15_5_2_4-4_5_3 | 0.0488246  | 0.0488142  | 0.289413 | 1.71059 |
| Atid_P15_P17_5_3_4-5_5_4 | 0.0489659  | 0.048966   | 0.257335 | 1.74266 |
| Atid_P14_P15_5_3_3-4_4_4 | 0.0489426  | 0.0489768  | 0.255629 | 1.74437 |
| Atid_P14_P18_5_3_3-5_5_5 | 0.0490617  | 0.0490443  | 0.2327   | 1.7673  |
| Atid_P14_P15_4_4_3-5_3_4 | 0.0490918  | 0.0491547  | 0.257035 | 1.74297 |
| Atid_P9_P15_4_1_1-4_5_3  | 0.0494304  | 0.0494645  | 0.376964 | 1.62304 |
| Atid_P14_P14_5_2_4-5_4_2 | 0.0495939  | 0.0495387  | 0.268026 | 1.73197 |
| Atid_P10_P11_3_3_1-3_2_3 | 0.0496308  | 0.0408359  | 0.269153 | 1.73085 |
| Atid_P13_P13_3_5_2-5_3_2 | 0.0499414  | 0.0499566  | 0.393112 | 1.60689 |
| Atid_P10_P12_3_2_2-3_4_2 | 0.0498831  | 0.0500393  | 0.382257 | 1.61774 |
| Atid_P13_P14_5_2_3-5_4_2 | 0.0504343  | 0.0505071  | 0.330103 | 1.6699  |
| Atid_P13_P14_4_2_4-5_4_2 | 0.0505145  | 0.0504942  | 0.204174 | 1.79583 |
| Atid_P11_P15_4_3_1-4_5_3 | 0.0506179  | 0.0507399  | 0.296879 | 1.70312 |
| Atid_P14_P16_4_3_4-5_5_3 | 0.0508911  | 0.0508242  | 0.270814 | 1.72919 |
| Atid_P12_P14_4_2_3-4_4_3 | 0.0509882  | 0.0510304  | 0.317545 | 1.68246 |
| Atid_P10_P11_3_2_2-3_4_1 | 0.0510349  | 0.0509972  | 0.466434 | 1.53357 |
| Atid_P13_P13_4_2_4-4_4_2 | 0.0509635  | 0.0510506  | 0.321935 | 1.67806 |
| Atid_P14_P14_3_5_3-5_3_3 | 0.050942   | 0.051114   | 0.316392 | 1.68361 |
| Atid_P10_P13_4_2_1-4_4_2 | 0.0511711  | 0.0511896  | 0.288403 | 1.7116  |
| Atid_P12_P18_5_2_2-5_5_5 | 0.0511413  | 0.0512941  | 0.20159  | 1.79841 |
| Atid_P10_P13_2_3_2-5_2_3 | 0.0513902  | 0.0500021  | 0.331131 | 1.66887 |
| Atid_P9_P11_2_3_1-4_1_3  | 0.0513699  | 0.051394   | 0.352111 | 1.64789 |
| Atid_P12_P15_4_2_3-5_4_3 | 0.0512342  | 0.0514214  | 0.230951 | 1.76905 |
| Atid_P13_P13_3_3_4-5_3_2 | 0.0512834  | 0.0514415  | 0.318835 | 1.68116 |
| Atid_P12_P15_5_2_2-4_4_4 | 0.0514211  | 0.0514886  | 0.230379 | 1.76962 |
| Atid_P8_P10_3_1_1-2_4_1  | 0.0514718  | 0.0515171  | 0.450671 | 1.54933 |
| Atid_P12_P14_4_4_1-4_4_3 | 0.0516208  | 0.0516559  | 0.381733 | 1.61827 |
| Atid_P12_P15_3_4_2-5_4_3 | 0.0516125  | 0.0517581  | 0.321931 | 1.67807 |
| Atid_P12_P15_3_4_2-5_3_4 | 0.0518961  | 0.0519107  | 0.255854 | 1.74415 |
| Atid_P12_P12_3_4_2-4_3_2 | 0.0518438  | 0.0519365  | 0.419533 | 1.58047 |
| Atid_P10_P11_4_2_1-2_3_3 | 0.0522344  | 0.038283   | 0.204174 | 1.79583 |
| Atid_P8_P12_2_2_1-4_2_3  | 0.0523178  | 0.0524157  | 0.390108 | 1.60989 |
| Atid_P12_P17_5_2_2-4_5_5 | 0.0522623  | 0.0524194  | 0.244146 | 1.75585 |
| Atid_P12_P12_4_2_3-4_3_2 | 0.0523421  | 0.0524311  | 0.244136 | 1.75586 |
| Atid_P12_P14_5_2_2-3_4_4 | 0.0524525  | 0.0524442  | 0.289963 | 1.71004 |



| name                     | $\Delta_l$ | $\Delta_a$ | $c_l$    | $c_a$   |
|--------------------------|------------|------------|----------|---------|
| Atid_P14_P14_3_4_4-5_4_2 | 0.0524649  | 0.0524876  | 0.313418 | 1.68658 |
| Atid_P8_P8_2_2_1-3_1_1   | 0.0528108  | 0.0527796  | 0.617881 | 1.38212 |
| Atid_P13_P15_5_3_2-5_5_2 | 0.0529628  | 0.0528118  | 0.403687 | 1.59631 |
| Atid_P14_P15_4_3_4-5_4_3 | 0.0530853  | 0.0530678  | 0.286479 | 1.71352 |
| Atid_P10_P11_2_4_1-4_1_3 | 0.0531803  | 0.0490409  | 0.354813 | 1.64519 |
| Atid_P12_P13_4_2_3-3_5_2 | 0.0533371  | 0.0533123  | 0.35281  | 1.64719 |
| Atid_P11_P13_2_4_2-5_2_3 | 0.0533651  | 0.0534307  | 0.33646  | 1.66354 |
| Atid_P8_P10_2_1_2-3_3_1  | 0.0534188  | 0.0535211  | 0.418079 | 1.58192 |
| Atid_P15_P16_4_4_4-5_5_3 | 0.0535212  | 0.0534959  | 0.233444 | 1.76656 |
| Atid_P11_P15_3_3_2-5_3_4 | 0.0535424  | 0.0535442  | 0.286797 | 1.7132  |
| Atid_P9_P12_2_2_2-4_3_2  | 0.0534734  | 0.0535644  | 0.321874 | 1.67813 |
| Atid_P14_P14_4_3_4-4_5_2 | 0.0535079  | 0.0535749  | 0.28035  | 1.71965 |
| Atid_P8_P14_2_1_2-5_4_2  | 0.0536621  | 0.0536617  | 0.31619  | 1.68381 |
| Atid_P11_P13_3_2_3-4_4_2 | 0.0536861  | 0.0537076  | 0.345807 | 1.65419 |
| Atid_P15_P16_4_5_3-5_4_4 | 0.0537371  | 0.0537414  | 0.234423 | 1.76558 |
| Atid_P9_P15_3_2_1-5_5_2  | 0.0536498  | 0.0537905  | 0.222101 | 1.7779  |
| Atid_P9_P10_3_1_2-2_4_1  | 0.0537731  | 0.0537943  | 0.465358 | 1.53464 |
| Atid_P13_P14_4_2_4-4_5_2 | 0.0538464  | 0.0539463  | 0.301507 | 1.69849 |
| Atid_P11_P16_4_2_2-5_4_4 | 0.0538185  | 0.0539469  | 0.231166 | 1.76883 |
| Atid_P11_P11_2_4_2-4_2_2 | 0.0539449  | 0.0540234  | 0.422148 | 1.57785 |
| Atid_P13_P14_3_3_4-5_4_2 | 0.0540316  | 0.0540019  | 0.290234 | 1.70977 |
| Atid_P10_P12_3_3_1-5_2_2 | 0.0540369  | 0.0540606  | 0.380576 | 1.61942 |
| Atid_P11_P12_2_3_3-5_2_2 | 0.0540725  | 0.0539986  | 0.376693 | 1.62331 |
| Atid_P7_P10_1_2_1-4_1_2  | 0.0542506  | 0.054271   | 0.388675 | 1.61133 |
| Atid_P11_P18_4_2_2-5_5_5 | 0.0543868  | 0.0543634  | 0.260456 | 1.73954 |
| Atid_P9_P9_2_3_1-4_1_1   | 0.0543846  | 0.0544174  | 0.45909  | 1.54091 |
| Atid_P10_P12_3_3_1-3_3_3 | 0.0546161  | 0.054662   | 0.448107 | 1.55189 |
| Atid_P11_P17_3_3_2-5_5_4 | 0.0547601  | 0.0548202  | 0.370742 | 1.62926 |
| Atid_P9_P12_2_2_2-4_4_1  | 0.0548852  | 0.054854   | 0.434941 | 1.56506 |
| Atid_P10_P15_3_1_3-5_5_2 | 0.0548507  | 0.0549106  | 0.310576 | 1.68942 |
| Atid_P11_P15_4_2_2-4_4_4 | 0.0549123  | 0.0549152  | 0.266768 | 1.73323 |
| Atid_P14_P16_4_4_3-5_4_4 | 0.0547913  | 0.0549217  | 0.260983 | 1.73902 |
| Atid_P8_P12_3_1_1-2_4_3  | 0.0550402  | 0.0549971  | 0.372019 | 1.62798 |
| Atid_P11_P15_4_1_3-5_5_2 | 0.0551692  | 0.0551794  | 0.267041 | 1.73296 |
| Atid_P11_P13_4_2_2-4_3_3 | 0.0551472  | 0.0552487  | 0.241686 | 1.75831 |
| Atid_P12_P12_4_3_2-4_4_1 | 0.0552714  | 0.0552705  | 0.206162 | 1.79384 |
| Atid_P9_P10_3_2_1-2_3_2  | 0.0553107  | 0.0553226  | 0.543507 | 1.45649 |
| Atid_P12_P13_3_3_3-4_4_2 | 0.0553241  | 0.0553739  | 0.315818 | 1.68418 |
| Atid_P8_P11_3_1_1-3_4_1  | 0.0554237  | 0.055487   | 0.288424 | 1.71158 |

| name                     | $\Delta_l$ | $\Delta_a$ | $c_l$    | $c_a$   |
|--------------------------|------------|------------|----------|---------|
| Atid_P11_P11_4_2_2-4_3_1 | 0.0554714  | 0.0555224  | 0.445759 | 1.55424 |
| Atid_P13_P16_3_4_3-5_5_3 | 0.0556683  | 0.0554744  | 0.28837  | 1.71163 |
| Atid_P8_P13_3_1_1-2_5_3  | 0.0556992  | 0.0556694  | 0.496523 | 1.50348 |
| Atid_P11_P12_3_2_3-4_3_2 | 0.0557532  | 0.0557371  | 0.331002 | 1.669   |
| Atid_P10_P15_4_1_2-5_5_2 | 0.0559875  | 0.0561484  | 0.351342 | 1.64866 |
| Atid_P12_P13_2_5_2-5_2_3 | 0.0563323  | 0.0564114  | 0.38059  | 1.61941 |
| Atid_P9_P10_4_1_1-2_4_1  | 0.0562757  | 0.0564172  | 0.234423 | 1.76558 |
| Atid_P12_P13_2_4_3-5_3_2 | 0.0564702  | 0.056527   | 0.377183 | 1.62282 |
| Atid_P11_P13_3_2_3-5_3_2 | 0.0564522  | 0.056531   | 0.252955 | 1.74704 |
| Atid_P13_P16_4_2_4-5_5_3 | 0.0565709  | 0.0565918  | 0.331867 | 1.66813 |
| Atid_P8_P15_3_1_1-5_5_2  | 0.0565979  | 0.0565985  | 0.466517 | 1.53348 |
| Atid_P10_P11_3_3_1-3_3_2 | 0.0566561  | 0.0567068  | 0.462814 | 1.53719 |
| Atid_P11_P16_3_2_3-5_5_3 | 0.0567924  | 0.0568883  | 0.332782 | 1.66722 |
| Atid_P10_P14_3_1_3-4_5_2 | 0.0571631  | 0.0571531  | 0.435703 | 1.5643  |
| Atid_P9_P11_2_2_2-4_2_2  | 0.0577223  | 0.0577213  | 0.409006 | 1.59099 |
| Atid_P8_P12_3_1_1-2_5_2  | 0.0578173  | 0.0577568  | 0.396028 | 1.60397 |
| Atid_P14_P17_5_3_3-4_5_5 | 0.0578337  | 0.0578096  | 0.267425 | 1.73258 |
| Atid_P11_P12_4_2_2-4_3_2 | 0.0579236  | 0.0579105  | 0.511323 | 1.48868 |
| Atid_P7_P13_1_2_1-5_3_2  | 0.058029   | 0.05802    | 0.414983 | 1.58502 |
| Atid_P9_P14_3_1_2-5_4_2  | 0.058069   | 0.0581727  | 0.3198   | 1.6802  |
| Atid_P17_P17_5_4_5-5_5_4 | 0.0581275  | 0.058203   | 0.23065  | 1.76935 |
| Atid_P8_P12_1_3_1-5_2_2  | 0.0582434  | 0.0582741  | 0.404929 | 1.59507 |
| Atid_P11_P12_4_1_3-3_4_2 | 0.0582177  | 0.0583671  | 0.268215 | 1.73178 |
| Atid_P12_P16_3_4_2-5_4_4 | 0.058389   | 0.0583817  | 0.303349 | 1.69665 |
| Atid_P7_P9_2_1_1-2_3_1   | 0.0583739  | 0.0584454  | 0.539465 | 1.46053 |
| Atid_P9_P12_2_2_2-5_2_2  | 0.0583163  | 0.0584757  | 0.388117 | 1.61188 |
| Atid_P13_P15_3_3_4-5_5_2 | 0.0585899  | 0.0585538  | 0.263785 | 1.73622 |
| Atid_P11_P12_3_3_2-4_4_1 | 0.0586527  | 0.0586428  | 0.361599 | 1.6384  |
| Atid_P8_P10_1_2_2-4_2_1  | 0.058831   | 0.0587977  | 0.325924 | 1.67408 |
| Atid_P9_P15_2_2_2-5_5_2  | 0.0589891  | 0.0590061  | 0.406435 | 1.59356 |
| Atid_P11_P15_3_2_3-5_4_3 | 0.0590255  | 0.0591224  | 0.342375 | 1.65762 |
| Atid_P16_P18_5_4_4-5_5_5 | 0.0593513  | 0.0593459  | 0.238087 | 1.76191 |
| Atid_P12_P13_4_2_3-5_3_2 | 0.0595862  | 0.0596349  | 0.307424 | 1.69258 |
| Atid_P11_P17_4_2_2-4_5_5 | 0.0594865  | 0.0596602  | 0.322543 | 1.67746 |
| Atid_P14_P17_4_5_2-5_4_5 | 0.0597314  | 0.0493977  | 0.218776 | 1.78122 |
| Atid_P10_P11_4_2_1-3_2_3 | 0.0598158  | 0.0566696  | 0.331131 | 1.66887 |
| Atid_P11_P15_4_2_2-3_5_4 | 0.0600639  | 0.0600748  | 0.340111 | 1.65989 |
| Atid_P7_P11_1_2_1-4_2_2  | 0.0600243  | 0.0600766  | 0.451117 | 1.54888 |
| Atid_P8_P14_2_2_1-4_4_3  | 0.0601239  | 0.0601337  | 0.532805 | 1.46719 |

| name                     | $\Delta_l$ | $\Delta_a$ | $c_l$    | $c_a$   |
|--------------------------|------------|------------|----------|---------|
| Atid_P10_P13_4_2_1-3_5_2 | 0.0601821  | 0.0602055  | 0.259144 | 1.74086 |
| Atid_P12_P14_3_2_4-5_4_2 | 0.0602744  | 0.060274   | 0.36037  | 1.63963 |
| Atid_P14_P17_5_2_4-5_5_4 | 0.0601929  | 0.0603005  | 0.248493 | 1.75151 |
| Atid_P9_P10_3_2_1-3_3_1  | 0.0603015  | 0.0603712  | 0.237834 | 1.76217 |
| Atid_P8_P11_2_1_2-3_4_1  | 0.0604044  | 0.0604328  | 0.421548 | 1.57845 |
| Atid_P11_P13_3_4_1-5_3_2 | 0.060468   | 0.0599406  | 0.234423 | 1.76558 |
| Atid_P8_P16_2_1_2-5_5_3  | 0.0605856  | 0.060622   | 0.38221  | 1.61779 |
| Atid_P13_P14_3_5_2-5_2_4 | 0.060725   | 0.0494876  | 0.234423 | 1.76558 |
| Atid_P12_P14_3_4_2-5_2_4 | 0.0608642  | 0.0473549  | 0.234423 | 1.76558 |
| Atid_P12_P14_5_2_2-2_5_4 | 0.0606834  | 0.0608677  | 0.318842 | 1.68116 |
| Atid_P10_P16_4_1_2-5_5_3 | 0.0610585  | 0.0611287  | 0.360836 | 1.63916 |
| Atid_P12_P17_4_3_2-4_5_5 | 0.0612359  | 0.0612081  | 0.30748  | 1.69252 |
| Atid_P9_P12_1_3_2-5_2_2  | 0.0613133  | 0.0612835  | 0.394874 | 1.60513 |
| Atid_P10_P10_2_3_2-4_1_2 | 0.0612694  | 0.0613187  | 0.346603 | 1.6534  |
| Atid_P12_P16_5_2_2-5_4_4 | 0.0613488  | 0.0532143  | 0.234423 | 1.76558 |
| Atid_P11_P14_3_2_3-4_5_2 | 0.0613873  | 0.0613764  | 0.319841 | 1.68016 |
| Atid_P11_P13_2_4_2-5_3_2 | 0.0614174  | 0.0614148  | 0.370415 | 1.62958 |
| Atid_P10_P13_4_1_2-4_4_2 | 0.0615684  | 0.0615615  | 0.331269 | 1.66873 |
| Atid_P10_P14_4_2_1-4_5_2 | 0.0615792  | 0.0615884  | 0.204703 | 1.7953  |
| Atid_P11_P14_4_2_2-3_4_4 | 0.0615989  | 0.0615985  | 0.342271 | 1.65773 |
| Atid_P8_P13_2_1_2-4_4_2  | 0.0615773  | 0.0616057  | 0.410741 | 1.58926 |
| Atid_P13_P16_5_3_2-4_4_5 | 0.0617595  | 0.0415549  | 0.177828 | 1.82217 |
| Atid_P15_P17_5_4_3-4_5_5 | 0.0615917  | 0.0617634  | 0.232141 | 1.76786 |
| Atid_P10_P12_4_2_1-4_3_2 | 0.0616763  | 0.0618265  | 0.522876 | 1.47712 |
| Atid_P16_P16_4_5_4-5_4_4 | 0.0620277  | 0.0620281  | 0.230769 | 1.76923 |
| Atid_P8_P13_2_2_1-4_4_2  | 0.0619708  | 0.0620292  | 0.52787  | 1.47213 |
| Atid_P10_P13_4_1_2-2_5_3 | 0.0620367  | 0.0620491  | 0.380189 | 1.61981 |
| Atid_P14_P14_4_3_4-5_3_3 | 0.0618497  | 0.0620497  | 0.278563 | 1.72144 |
| Atid_P9_P10_2_2_2-3_3_1  | 0.0620909  | 0.0621179  | 0.471183 | 1.52882 |
| Atid_P14_P16_5_4_2-5_3_5 | 0.0623514  | 0.0364905  | 0.11749  | 1.88251 |
| Atid_P13_P16_4_4_2-5_3_5 | 0.0623742  | 0.043064   | 0.177828 | 1.82217 |
| Atid_P12_P13_5_2_2-4_3_3 | 0.0623959  | 0.0623809  | 0.306202 | 1.6938  |
| Atid_P9_P14_3_2_1-4_5_2  | 0.0626757  | 0.0626855  | 0.292144 | 1.70786 |
| Atid_P14_P17_4_5_2-5_5_4 | 0.0628184  | 0.0628443  | 0.317146 | 1.68285 |
| Atid_P14_P14_4_4_3-5_2_4 | 0.0629931  | 0.0630697  | 0.2364   | 1.7636  |
| Atid_P9_P14_4_1_1-4_5_2  | 0.0631338  | 0.0631793  | 0.392395 | 1.60761 |
| Atid_P13_P15_5_2_3-3_5_4 | 0.0631896  | 0.0632504  | 0.290146 | 1.70985 |
| Atid_P10_P12_2_3_2-4_3_2 | 0.0632138  | 0.0632749  | 0.369324 | 1.63068 |
| Atid_P11_P12_4_3_1-3_4_2 | 0.0632452  | 0.063377   | 0.314911 | 1.68509 |

| name                     | $\Delta_l$ | $\Delta_a$ | $c_l$     | $c_a$   |
|--------------------------|------------|------------|-----------|---------|
| Atid_P8_P9_2_2_1-3_1_2   | 0.0634256  | 0.0634609  | 0.359902  | 1.6401  |
| Atid_P14_P15_5_3_3-3_5_4 | 0.0636384  | 0.0636567  | 0.285655  | 1.71435 |
| Atid_P10_P11_2_4_1-4_2_2 | 0.0637868  | 0.0637649  | 0.493837  | 1.50616 |
| Atid_P10_P13_4_2_1-2_5_3 | 0.0638891  | 0.0639024  | 0.431487  | 1.56851 |
| Atid_P16_P16_4_4_5-5_5_3 | 0.0638756  | 0.0639281  | 0.23162   | 1.76838 |
| Atid_P15_P16_4_5_3-5_3_5 | 0.0637851  | 0.0639458  | 0.265814  | 1.73419 |
| Atid_P11_P16_3_3_2-5_4_4 | 0.0640011  | 0.0638312  | 0.354813  | 1.64519 |
| Atid_P11_P13_4_3_1-5_3_2 | 0.0640729  | 0.0640298  | 0.407361  | 1.59264 |
| Atid_P15_P17_4_5_3-5_5_4 | 0.0639139  | 0.0640931  | 0.241599  | 1.7584  |
| Atid_P11_P15_4_1_3-4_5_3 | 0.0641341  | 0.0641248  | 0.24077   | 1.75923 |
| Atid_P6_P12_1_1_1-4_4_1  | 0.0643646  | 0.0643821  | 0.50414   | 1.49586 |
| Atid_P14_P14_4_3_4-4_4_3 | 0.0643943  | 0.0643831  | 0.291931  | 1.70807 |
| Atid_P15_P17_4_5_3-5_4_5 | 0.0644078  | 0.064503   | 0.219406  | 1.78059 |
| Atid_P12_P14_4_1_4-4_5_2 | 0.0644738  | 0.0645227  | 0.311338  | 1.68866 |
| Atid_P10_P13_2_2_3-5_3_2 | 0.0643693  | 0.0645437  | 0.403582  | 1.59642 |
| Atid_P10_P18_3_2_2-5_5_5 | 0.06449    | 0.0646435  | 0.340904  | 1.6591  |
| Atid_P9_P14_3_1_2-3_5_3  | 0.0647606  | 0.0647926  | 0.421401  | 1.5786  |
| Atid_P14_P14_3_4_4-5_3_3 | 0.0647977  | 0.0647986  | 0.281174  | 1.71883 |
| Atid_P14_P14_4_4_3-4_5_2 | 0.0646792  | 0.0648195  | 0.343928  | 1.65607 |
| Atid_P11_P14_4_2_2-5_3_3 | 0.0648639  | 0.0649045  | 0.317237  | 1.68276 |
| Atid_P10_P12_4_1_2-4_4_1 | 0.0649076  | 0.0648344  | 0.427323  | 1.57268 |
| Atid_P12_P13_5_2_2-2_4_4 | 0.0648005  | 0.0650342  | 0.317259  | 1.68274 |
| Atid_P12_P15_3_2_4-5_5_2 | 0.0650178  | 0.0650515  | 0.308987  | 1.69101 |
| Atid_P12_P13_4_4_1-5_3_2 | 0.0648518  | 0.065066   | 0.187349  | 1.81265 |
| Atid_P14_P18_4_5_2-5_5_5 | 0.065278   | 0.0652954  | 0.275336  | 1.72466 |
| Atid_P12_P14_5_2_2-5_4_2 | 0.0652113  | 0.0653162  | 0.454865  | 1.54514 |
| Atid_P11_P14_2_4_2-5_3_3 | 0.0651937  | 0.0653807  | 0.337549  | 1.66245 |
| Atid_P8_P11_2_2_1-3_3_2  | 0.0653247  | 0.0653854  | 0.525028  | 1.47497 |
| Atid_P11_P14_2_3_3-5_4_2 | 0.0652816  | 0.0654011  | 0.319677  | 1.68032 |
| Atid_P14_P15_5_4_2-3_5_4 | 0.065365   | 0.0654691  | 0.335643  | 1.66436 |
| Atid_P6_P13_1_1_1-5_3_2  | 0.0654931  | 0.0342049  | 0.0776247 | 1.92238 |
| Atid_P11_P13_2_3_3-5_3_2 | 0.0656461  | 0.0542087  | 0.218776  | 1.78122 |
| Atid_P10_P12_4_1_2-2_4_3 | 0.065812   | 0.0658174  | 0.337638  | 1.66236 |
| Atid_P7_P13_2_1_1-3_4_3  | 0.0658565  | 0.0659992  | 0.485074  | 1.51493 |
| Atid_P13_P18_4_3_3-5_5_5 | 0.0660455  | 0.0660559  | 0.28735   | 1.71265 |
| Atid_P16_P17_5_3_5-5_5_4 | 0.0659661  | 0.0660684  | 0.261233  | 1.73877 |
| Atid_P14_P14_3_5_3-5_2_4 | 0.066121   | 0.0660796  | 0.31818   | 1.68182 |
| Atid_P10_P15_4_2_1-5_5_2 | 0.0661032  | 0.0661681  | 0.270572  | 1.72943 |
| Atid_P15_P16_4_3_5-5_5_3 | 0.0660393  | 0.0661706  | 0.283212  | 1.71679 |

| name                     | $\Delta_l$ | $\Delta_a$ | $c_l$     | $c_a$   |
|--------------------------|------------|------------|-----------|---------|
| Atid_P11_P18_3_3_2-5_5_5 | 0.0661748  | 0.0661235  | 0.305054  | 1.69495 |
| Atid_P9_P10_2_3_1-3_2_2  | 0.0661894  | 0.0661933  | 0.479776  | 1.52022 |
| Atid_P10_P13_4_1_2-3_4_3 | 0.0662547  | 0.0662844  | 0.283377  | 1.71662 |
| Atid_P9_P14_3_2_1-3_5_3  | 0.0663631  | 0.0664033  | 0.434981  | 1.56502 |
| Atid_P12_P16_5_2_2-3_5_5 | 0.0665853  | 0.0514454  | 0.234423  | 1.76558 |
| Atid_P7_P13_1_2_1-5_2_3  | 0.0666859  | 0.0666716  | 0.38991   | 1.61009 |
| Atid_P13_P15_5_2_3-4_4_4 | 0.0667565  | 0.0667817  | 0.233202  | 1.7668  |
| Atid_P14_P15_3_4_4-5_5_2 | 0.066752   | 0.0669001  | 0.30016   | 1.69984 |
| Atid_P13_P13_4_3_3-5_2_3 | 0.0668357  | 0.0669316  | 0.245742  | 1.75426 |
| Atid_P8_P8_1_3_1-3_1_1   | 0.0668774  | 0.0669344  | 0.488378  | 1.51162 |
| Atid_P9_P11_3_1_2-3_3_2  | 0.0671737  | 0.0672827  | 0.246571  | 1.75343 |
| Atid_P10_P15_4_1_2-3_5_4 | 0.0673119  | 0.0674236  | 0.30707   | 1.69293 |
| Atid_P15_P16_5_4_3-4_4_5 | 0.0672098  | 0.0674289  | 0.266302  | 1.7337  |
| Atid_P12_P14_4_3_2-4_3_4 | 0.0673613  | 0.0674575  | 0.292586  | 1.70741 |
| Atid_P12_P14_4_3_2-3_4_4 | 0.0673894  | 0.0674818  | 0.299306  | 1.70069 |
| Atid_P11_P13_4_3_1-5_2_3 | 0.0676048  | 0.0676459  | 0.434624  | 1.56538 |
| Atid_P7_P13_2_1_1-4_3_3  | 0.0679154  | 0.0679698  | 0.3466    | 1.6534  |
| Atid_P10_P11_2_3_2-4_3_1 | 0.068061   | 0.0511371  | 0.308998  | 1.691   |
| Atid_P12_P13_4_2_3-4_3_3 | 0.0680856  | 0.0681589  | 0.269153  | 1.73085 |
| Atid_P13_P13_2_5_3-5_2_3 | 0.0681544  | 0.0681764  | 0.358023  | 1.64198 |
| Atid_P12_P13_4_2_3-3_4_3 | 0.0678528  | 0.0682176  | 0.340643  | 1.65936 |
| Atid_P7_P11_2_1_1-3_4_1  | 0.0509372  | 0.0683215  | 0.467735  | 1.53226 |
| Atid_P10_P12_2_4_1-4_2_3 | 0.0683559  | 0.068352   | 0.390773  | 1.60923 |
| Atid_P11_P12_4_2_2-2_4_3 | 0.0683937  | 0.0683121  | 0.399672  | 1.60033 |
| Atid_P11_P13_4_1_3-4_4_2 | 0.0681795  | 0.0683942  | 0.255014  | 1.74499 |
| Atid_P13_P15_4_2_4-5_4_3 | 0.0684489  | 0.0685091  | 0.282821  | 1.71718 |
| Atid_P15_P16_5_5_2-5_3_5 | 0.0685798  | 0.0256485  | 0.0630957 | 1.9369  |
| Atid_P8_P14_2_1_2-4_5_2  | 0.0685851  | 0.0686101  | 0.359794  | 1.64021 |
| Atid_P14_P16_5_3_3-4_4_5 | 0.0686419  | 0.0686861  | 0.258078  | 1.74192 |
| Atid_P6_P12_1_1_1-5_2_2  | 0.0685197  | 0.0687486  | 0.441256  | 1.55874 |
| Atid_P13_P15_4_2_4-4_5_3 | 0.0687816  | 0.0689144  | 0.336671  | 1.66333 |
| Atid_P15_P15_4_4_4-5_3_4 | 0.0689111  | 0.0689905  | 0.254669  | 1.74533 |
| Atid_P7_P14_2_1_1-3_5_3  | 0.068979   | 0.0689916  | 0.447498  | 1.5525  |
| Atid_P11_P14_4_1_3-3_5_3 | 0.0687061  | 0.0689949  | 0.363883  | 1.63612 |
| Atid_P6_P11_1_1_1-4_2_2  | 0.0690297  | 0.06366    | 0.356132  | 1.64387 |
| Atid_P11_P14_4_3_1-3_5_3 | 0.0690083  | 0.0690479  | 0.38746   | 1.61254 |
| Atid_P14_P16_5_2_4-4_5_4 | 0.0690135  | 0.069132   | 0.279156  | 1.72084 |
| Atid_P14_P17_5_4_2-4_5_5 | 0.0691404  | 0.0409559  | 0.190546  | 1.80945 |
| Atid_P8_P13_1_3_1-5_2_3  | 0.0691238  | 0.0691816  | 0.426541  | 1.57346 |

| name                     | $\Delta_l$ | $\Delta_a$ | $c_l$    | $c_a$   |
|--------------------------|------------|------------|----------|---------|
| Atid_P9_P10_1_3_2-4_2_1  | 0.0691868  | 0.069201   | 0.503121 | 1.49688 |
| Atid_P13_P16_3_4_3-5_4_4 | 0.0692256  | 0.0692353  | 0.324447 | 1.67555 |
| Atid_P11_P15_3_3_2-4_4_4 | 0.0692211  | 0.0692597  | 0.282132 | 1.71787 |
| Atid_P10_P13_3_2_2-3_4_3 | 0.0693241  | 0.0693683  | 0.383975 | 1.61603 |
| Atid_P9_P9_2_3_1-3_2_1   | 0.0693931  | 0.0693485  | 0.536804 | 1.4632  |
| Atid_P12_P13_3_3_3-5_2_3 | 0.0694444  | 0.0694444  | 0.294069 | 1.70593 |
| Atid_P12_P15_4_1_4-5_5_2 | 0.0694894  | 0.0694884  | 0.202457 | 1.79754 |
| Atid_P12_P15_4_3_2-3_5_4 | 0.0697286  | 0.0698682  | 0.382411 | 1.61759 |
| Atid_P13_P13_4_2_4-5_3_2 | 0.0697963  | 0.0698778  | 0.219946 | 1.78005 |
| Atid_P11_P16_4_1_3-5_5_3 | 0.0699127  | 0.0699193  | 0.181482 | 1.81852 |
| Atid_P12_P16_5_2_2-4_4_5 | 0.0699595  | 0.0700201  | 0.228184 | 1.77182 |
| Atid_P13_P13_3_4_3-4_3_3 | 0.0698821  | 0.0700738  | 0.281865 | 1.71814 |
| Atid_P10_P12_3_2_2-3_3_3 | 0.0700207  | 0.0700823  | 0.372936 | 1.62706 |
| Atid_P7_P13_2_1_1-5_3_2  | 0.0702298  | 0.070216   | 0.566927 | 1.43307 |
| Atid_P12_P13_4_3_2-4_2_4 | 0.0703413  | 0.0703603  | 0.23287  | 1.76713 |
| Atid_P11_P13_4_2_2-2_5_3 | 0.0703295  | 0.0703652  | 0.423695 | 1.57631 |
| Atid_P14_P15_3_5_3-5_3_4 | 0.0703334  | 0.0704399  | 0.266365 | 1.73363 |
| Atid_P12_P16_3_3_3-5_4_4 | 0.0706529  | 0.0706726  | 0.287653 | 1.71235 |
| Atid_P13_P17_5_2_3-4_5_5 | 0.0706729  | 0.0707518  | 0.253958 | 1.74604 |
| Atid_P8_P15_3_1_1-5_4_3  | 0.0707015  | 0.0708015  | 0.462135 | 1.53787 |
| Atid_P9_P11_4_1_1-2_3_3  | 0.0708261  | 0.0708421  | 0.349789 | 1.65021 |
| Atid_P9_P14_3_1_2-4_4_3  | 0.0709648  | 0.0711034  | 0.450061 | 1.54994 |
| Atid_P11_P11_2_3_3-4_2_2 | 0.0712762  | 0.0712648  | 0.339265 | 1.66073 |
| Atid_P10_P10_3_2_2-3_2_2 | 0.07135    | 0.0713438  | 0.694314 | 1.30569 |
| Atid_P9_P11_3_1_2-4_3_1  | 0.0714302  | 0.0714256  | 0.425413 | 1.57459 |
| Atid_P12_P14_3_3_3-4_5_2 | 0.0713869  | 0.0714357  | 0.309582 | 1.69042 |
| Atid_P10_P13_3_1_3-4_4_2 | 0.0715862  | 0.0716035  | 0.352736 | 1.64726 |
| Atid_P13_P13_2_4_4-5_3_2 | 0.0716495  | 0.0716431  | 0.293659 | 1.70634 |
| Atid_P9_P11_3_1_2-2_4_2  | 0.0716109  | 0.0716507  | 0.501185 | 1.49882 |
| Atid_P10_P14_2_3_2-5_3_3 | 0.0716719  | 0.0510953  | 0.204174 | 1.79583 |
| Atid_P10_P14_4_1_2-4_4_3 | 0.072009   | 0.0720335  | 0.287071 | 1.71293 |
| Atid_P10_P12_4_2_1-2_5_2 | 0.0721107  | 0.072068   | 0.416266 | 1.58373 |
| Atid_P12_P13_3_3_3-4_3_3 | 0.0721002  | 0.0721336  | 0.333507 | 1.66649 |
| Atid_P12_P13_2_4_3-5_2_3 | 0.0721129  | 0.0721776  | 0.321884 | 1.67812 |
| Atid_P13_P13_3_5_2-4_3_3 | 0.0722336  | 0.0721693  | 0.326712 | 1.67329 |
| Atid_P13_P15_3_5_2-5_4_3 | 0.0720713  | 0.0722431  | 0.34823  | 1.65177 |
| Atid_P14_P16_4_2_5-5_5_3 | 0.0722452  | 0.0722257  | 0.339438 | 1.66056 |
| Atid_P11_P11_3_2_3-3_3_2 | 0.0721771  | 0.0722555  | 0.387187 | 1.61281 |
| Atid_P8_P15_2_2_1-5_5_2  | 0.0724999  | 0.0544752  | 0.309029 | 1.69097 |

| name                     | $\Delta_l$ | $\Delta_a$ | $c_l$    | $c_a$   |
|--------------------------|------------|------------|----------|---------|
| Atid_P13_P14_5_3_2-5_2_4 | 0.0724974  | 0.0725468  | 0.281971 | 1.71803 |
| Atid_P13_P14_5_2_3-3_4_4 | 0.0724865  | 0.0725655  | 0.290195 | 1.70981 |
| Atid_P13_P14_3_4_3-5_2_4 | 0.072636   | 0.0727503  | 0.295035 | 1.70497 |
| Atid_P11_P17_4_2_2-5_4_5 | 0.0725982  | 0.0727903  | 0.216895 | 1.78311 |
| Atid_P13_P13_3_3_4-4_4_2 | 0.0728045  | 0.0727295  | 0.285946 | 1.71405 |
| Atid_P7_P11_2_1_1-4_3_1  | 0.0728882  | 0.0728792  | 0.31059  | 1.68941 |
| Atid_P6_P15_1_1_1-5_4_3  | 0.0729674  | 0.0599408  | 0.234423 | 1.76558 |
| Atid_P9_P13_3_1_2-3_4_3  | 0.072928   | 0.073021   | 0.371498 | 1.6285  |
| Atid_P9_P14_4_1_1-4_4_3  | 0.0730176  | 0.0730583  | 0.381066 | 1.61893 |
| Atid_P12_P13_4_3_2-3_3_4 | 0.0731209  | 0.0731297  | 0.328114 | 1.67189 |
| Atid_P12_P17_3_4_2-5_4_5 | 0.0730218  | 0.0731505  | 0.281009 | 1.71899 |
| Atid_P13_P13_2_5_3-5_3_2 | 0.0731735  | 0.0731878  | 0.377559 | 1.62244 |
| Atid_P8_P9_3_1_1-2_2_2   | 0.0731452  | 0.0731971  | 0.388806 | 1.61119 |
| Atid_P15_P15_5_3_4-5_3_4 | 0.0732051  | 0.0731657  | 0.346265 | 1.65373 |
| Atid_P10_P14_2_2_3-5_4_2 | 0.0732242  | 0.0679611  | 0.288403 | 1.7116  |
| Atid_P14_P17_4_4_3-5_4_5 | 0.0733451  | 0.0733206  | 0.276565 | 1.72344 |
| Atid_P13_P16_3_5_2-5_4_4 | 0.0734216  | 0.0734444  | 0.289044 | 1.71096 |
| Atid_P14_P16_5_2_4-5_4_4 | 0.0736931  | 0.0737298  | 0.222868 | 1.77713 |
| Atid_P11_P17_3_2_3-5_5_4 | 0.0737369  | 0.0737678  | 0.316965 | 1.68304 |
| Atid_P11_P11_2_4_2-4_1_3 | 0.0739056  | 0.0738423  | 0.408029 | 1.59197 |
| Atid_P16_P17_5_4_4-5_4_5 | 0.0740033  | 0.0738935  | 0.274048 | 1.72595 |
| Atid_P14_P15_3_5_3-5_4_3 | 0.0739992  | 0.0740038  | 0.26869  | 1.73131 |
| Atid_P14_P16_4_3_4-5_4_4 | 0.0741422  | 0.0741533  | 0.282114 | 1.71789 |
| Atid_P12_P13_5_2_2-3_3_4 | 0.0740347  | 0.0741542  | 0.283225 | 1.71677 |
| Atid_P8_P12_3_1_1-3_3_3  | 0.0741605  | 0.0741435  | 0.314469 | 1.68553 |
| Atid_P14_P18_5_2_4-5_5_5 | 0.0743529  | 0.0744637  | 0.243147 | 1.75685 |
| Atid_P9_P10_1_4_1-4_1_2  | 0.0745258  | 0.0745236  | 0.403721 | 1.59628 |
| Atid_P12_P13_3_4_2-4_2_4 | 0.0745254  | 0.0745434  | 0.327372 | 1.67263 |
| Atid_P6_P10_1_1_1-3_3_1  | 0.0745564  | 0.0745573  | 0.580365 | 1.41963 |
| Atid_P13_P14_4_3_3-3_5_3 | 0.0743542  | 0.0745858  | 0.307947 | 1.69205 |
| Atid_P10_P14_4_2_1-5_4_2 | 0.0745367  | 0.0746848  | 0.377982 | 1.62202 |
| Atid_P12_P12_3_3_3-5_2_2 | 0.0747158  | 0.0461162  | 0.165959 | 1.83404 |
| Atid_P10_P15_2_2_3-5_5_2 | 0.0746579  | 0.0747404  | 0.311387 | 1.68861 |
| Atid_P10_P10_3_3_1-4_2_1 | 0.0745966  | 0.0747639  | 0.233328 | 1.76667 |
| Atid_P9_P13_3_2_1-3_5_2  | 0.0747993  | 0.0748897  | 0.451446 | 1.54855 |
| Atid_P9_P9_1_4_1-4_1_1   | 0.0749299  | 0.0748644  | 0.448879 | 1.55112 |
| Atid_P8_P9_1_2_2-4_1_1   | 0.0749135  | 0.075087   | 0.485005 | 1.515   |
| Atid_P15_P15_3_5_4-5_4_3 | 0.0750406  | 0.0751289  | 0.259748 | 1.74025 |
| Atid_P16_P17_4_5_4-5_4_5 | 0.0751621  | 0.0751806  | 0.220162 | 1.77984 |

| name                     | $\Delta_l$ | $\Delta_a$ | $c_l$    | $c_a$   |
|--------------------------|------------|------------|----------|---------|
| Atid_P13_P14_4_2_4-4_4_3 | 0.0751074  | 0.0752201  | 0.330397 | 1.6696  |
| Atid_P12_P15_4_2_3-4_4_4 | 0.0753612  | 0.075316   | 0.30253  | 1.69747 |
| Atid_P14_P16_5_3_3-3_5_5 | 0.0752641  | 0.0753684  | 0.28243  | 1.71757 |
| Atid_P8_P9_2_1_2-3_2_1   | 0.0751383  | 0.0754965  | 0.301457 | 1.69854 |
| Atid_P13_P14_3_3_4-5_3_3 | 0.0754692  | 0.0755277  | 0.313812 | 1.68619 |
| Atid_P15_P16_4_4_4-4_5_4 | 0.0755329  | 0.0756552  | 0.264247 | 1.73575 |
| Atid_P9_P10_3_1_2-2_3_2  | 0.0755775  | 0.0757023  | 0.432535 | 1.56747 |
| Atid_P13_P16_3_3_4-5_5_3 | 0.0756038  | 0.0757112  | 0.252878 | 1.74712 |
| Atid_P10_P14_3_1_3-5_4_2 | 0.0756723  | 0.0757286  | 0.253652 | 1.74635 |
| Atid_P12_P13_4_1_4-3_5_2 | 0.0757478  | 0.0757302  | 0.367734 | 1.63227 |
| Atid_P10_P15_2_3_2-5_5_2 | 0.0757917  | 0.0755443  | 0.372531 | 1.62747 |
| Atid_P7_P10_2_1_1-2_3_2  | 0.0758872  | 0.0759044  | 0.521071 | 1.47893 |
| Atid_P11_P14_3_3_2-4_3_4 | 0.0760895  | 0.076089   | 0.359025 | 1.64097 |
| Atid_P7_P14_2_1_1-5_3_3  | 0.0759495  | 0.0761232  | 0.416732 | 1.58327 |
| Atid_P12_P14_3_4_2-4_4_3 | 0.076114   | 0.0761478  | 0.320716 | 1.67928 |
| Atid_P6_P15_1_1_1-5_5_2  | 0.0762359  | 0.0619516  | 0.354666 | 1.64533 |
| Atid_P12_P14_2_4_3-5_3_3 | 0.076074   | 0.0762497  | 0.288736 | 1.71126 |
| Atid_P8_P12_2_1_2-4_3_2  | 0.076323   | 0.0763517  | 0.332839 | 1.66716 |
| Atid_P7_P12_2_1_1-3_3_3  | 0.0763954  | 0.076414   | 0.455585 | 1.54441 |
| Atid_P7_P14_1_2_1-5_3_3  | 0.0764058  | 0.0764147  | 0.410658 | 1.58934 |
| Atid_P16_P17_4_4_5-5_5_4 | 0.0762223  | 0.0764174  | 0.245948 | 1.75405 |
| Atid_P8_P9_3_1_1-1_3_2   | 0.0764748  | 0.0764791  | 0.519662 | 1.48034 |
| Atid_P11_P17_4_1_3-5_5_4 | 0.076412   | 0.0765225  | 0.226617 | 1.77338 |
| Atid_P14_P16_4_5_2-5_3_5 | 0.0765491  | 0.0423727  | 0.125893 | 1.87411 |
| Atid_P10_P14_3_2_2-3_5_3 | 0.0765515  | 0.0766044  | 0.405152 | 1.59485 |
| Atid_P13_P13_4_3_3-4_3_3 | 0.0765465  | 0.076634   | 0.562992 | 1.43701 |
| Atid_P12_P18_4_2_3-5_5_5 | 0.076601   | 0.0767549  | 0.317268 | 1.68273 |
| Atid_P9_P11_4_1_1-3_3_2  | 0.0767378  | 0.0768195  | 0.441934 | 1.55807 |
| Atid_P14_P16_3_5_3-5_4_4 | 0.0766877  | 0.0768561  | 0.245003 | 1.755   |
| Atid_P9_P16_3_1_2-4_5_4  | 0.0767995  | 0.0768773  | 0.388564 | 1.61144 |
| Atid_P9_P16_4_1_1-5_5_3  | 0.0768925  | 0.0768425  | 0.377649 | 1.62235 |
| Atid_P12_P13_4_3_2-3_5_2 | 0.0768966  | 0.0769407  | 0.393064 | 1.60694 |
| Atid_P8_P10_2_2_1-3_3_1  | 0.0768296  | 0.076962   | 0.440556 | 1.55944 |
| Atid_P8_P12_1_2_2-5_2_2  | 0.0772028  | 0.0772348  | 0.356219 | 1.64378 |
| Atid_P10_P13_3_2_2-3_5_2 | 0.0771576  | 0.0772603  | 0.361116 | 1.63888 |
| Atid_P13_P17_4_2_4-5_5_4 | 0.0773171  | 0.0774775  | 0.326994 | 1.67301 |
| Atid_P8_P12_3_1_1-4_4_1  | 0.0775197  | 0.0774942  | 0.448367 | 1.55163 |
| Atid_P13_P13_3_5_2-4_2_4 | 0.0774494  | 0.0775719  | 0.311239 | 1.68876 |
| Atid_P8_P11_1_2_2-4_3_1  | 0.0775603  | 0.0775925  | 0.473394 | 1.52661 |



| name                     | $\Delta_l$ | $\Delta_a$ | $c_l$    | $c_a$   |
|--------------------------|------------|------------|----------|---------|
| Atid_P12_P13_3_2_4-5_3_2 | 0.0775547  | 0.0776057  | 0.28697  | 1.71303 |
| Atid_P13_P13_5_2_3-5_3_2 | 0.07766    | 0.0776719  | 0.325456 | 1.67454 |
| Atid_P9_P10_2_2_2-3_2_2  | 0.0776758  | 0.0776465  | 0.43449  | 1.56551 |
| Atid_P9_P17_3_1_2-5_5_4  | 0.077816   | 0.0777896  | 0.255289 | 1.74471 |
| Atid_P14_P15_5_3_3-5_3_4 | 0.0751303  | 0.0778937  | 0.436516 | 1.56348 |
| Atid_P9_P13_2_2_2-5_2_3  | 0.0780279  | 0.0780574  | 0.375545 | 1.62445 |
| Atid_P8_P12_3_1_1-4_3_2  | 0.078051   | 0.0780916  | 0.461846 | 1.53815 |
| Atid_P14_P17_3_4_4-5_5_4 | 0.0781265  | 0.0781487  | 0.238262 | 1.76174 |
| Atid_P13_P17_3_4_3-5_5_4 | 0.0777212  | 0.0781908  | 0.331131 | 1.66887 |
| Atid_P11_P15_3_2_3-4_5_3 | 0.0781596  | 0.0782725  | 0.312206 | 1.68779 |
| Atid_P11_P15_3_1_4-5_5_2 | 0.0780875  | 0.0783179  | 0.36014  | 1.63986 |
| Atid_P12_P16_3_2_4-5_5_3 | 0.0784411  | 0.0785512  | 0.342722 | 1.65728 |
| Atid_P11_P16_4_2_2-4_4_5 | 0.0784535  | 0.0786006  | 0.274383 | 1.72562 |
| Atid_P10_P12_2_3_2-4_2_3 | 0.0784784  | 0.0786347  | 0.344068 | 1.65593 |
| Atid_P10_P15_3_3_1-5_5_2 | 0.0786433  | 0.0786695  | 0.304147 | 1.69585 |
| Atid_P12_P12_3_3_3-4_2_3 | 0.0786722  | 0.0786654  | 0.310883 | 1.68912 |
| Atid_P9_P12_4_1_1-3_3_3  | 0.0787607  | 0.0787535  | 0.348519 | 1.65148 |
| Atid_P8_P15_2_1_2-5_4_3  | 0.0787767  | 0.0788645  | 0.3754   | 1.6246  |
| Atid_P13_P14_3_3_4-4_5_2 | 0.0788751  | 0.0788105  | 0.275253 | 1.72475 |
| Atid_P12_P14_4_3_2-5_2_4 | 0.0789124  | 0.0663354  | 0.234423 | 1.76558 |
| Atid_P10_P12_3_1_3-3_4_2 | 0.0787875  | 0.0789206  | 0.454813 | 1.54519 |
| Atid_P16_P16_4_5_4-5_3_5 | 0.0789611  | 0.078998   | 0.262352 | 1.73765 |
| Atid_P8_P11_3_1_1-2_3_3  | 0.0789371  | 0.0790136  | 0.390873 | 1.60913 |
| Atid_P12_P14_5_2_2-5_3_3 | 0.0791314  | 0.0791506  | 0.316644 | 1.68336 |
| Atid_P12_P12_3_4_2-4_1_4 | 0.0790725  | 0.0791971  | 0.354819 | 1.64518 |
| Atid_P6_P16_1_1_1-5_5_3  | 0.0792398  | 0.0791821  | 0.474102 | 1.5259  |
| Atid_P13_P16_5_2_3-3_5_5 | 0.0791762  | 0.0793946  | 0.285342 | 1.71466 |
| Atid_P11_P12_3_3_2-3_4_2 | 0.0793486  | 0.0794152  | 0.447448 | 1.55255 |
| Atid_P6_P12_1_1_1-4_3_2  | 0.0795483  | 0.0495163  | 0.204174 | 1.79583 |
| Atid_P10_P10_2_3_2-3_2_2 | 0.079509   | 0.0795528  | 0.388794 | 1.61121 |
| Atid_P12_P13_2_3_4-5_3_2 | 0.0795736  | 0.0795735  | 0.295242 | 1.70476 |
| Atid_P12_P13_3_2_4-4_4_2 | 0.0796677  | 0.079632   | 0.345238 | 1.65476 |
| Atid_P8_P10_2_2_1-4_1_2  | 0.0798285  | 0.0798294  | 0.4846   | 1.5154  |
| Atid_P11_P17_3_3_2-5_4_5 | 0.0799221  | 0.0800102  | 0.29097  | 1.70903 |
| Atid_P13_P14_2_4_4-5_4_2 | 0.0800248  | 0.0801807  | 0.321726 | 1.67827 |
| Atid_P10_P13_2_4_1-5_3_2 | 0.0802439  | 0.0802889  | 0.419152 | 1.58085 |
| Atid_P9_P12_3_2_1-2_4_3  | 0.0803015  | 0.0803007  | 0.528276 | 1.47172 |
| Atid_P12_P14_2_5_2-5_2_4 | 0.0804142  | 0.0804561  | 0.322121 | 1.67788 |
| Atid_P13_P14_2_5_3-5_3_3 | 0.080491   | 0.08047    | 0.321608 | 1.67839 |

| name                     | $\Delta_l$ | $\Delta_a$ | $c_l$    | $c_a$   |
|--------------------------|------------|------------|----------|---------|
| Atid_P14_P17_3_5_3-5_5_4 | 0.0802537  | 0.0805045  | 0.326741 | 1.67326 |
| Atid_P6_P8_1_1_1-3_1_1   | 0.0804031  | 0.0805099  | 0.43902  | 1.56098 |
| Atid_P11_P12_3_2_3-3_4_2 | 0.0805346  | 0.0805518  | 0.332412 | 1.66759 |
| Atid_P15_P16_4_5_3-4_4_5 | 0.080596   | 0.0805967  | 0.226733 | 1.77327 |
| Atid_P12_P12_3_2_4-4_3_2 | 0.080568   | 0.0806156  | 0.369072 | 1.63093 |
| Atid_P9_P11_4_1_1-3_4_1  | 0.08045    | 0.0806737  | 0.384202 | 1.6158  |
| Atid_P14_P16_4_4_3-4_4_5 | 0.0806703  | 0.080702   | 0.298238 | 1.70176 |
| Atid_P15_P15_3_5_4-5_5_2 | 0.0806966  | 0.0807938  | 0.312164 | 1.68784 |
| Atid_P11_P13_3_4_1-4_3_3 | 0.0808758  | 0.0449361  | 0.234423 | 1.76558 |
| Atid_P15_P15_4_5_3-5_2_5 | 0.0810651  | 0.0634999  | 0.234423 | 1.76558 |
| Atid_P11_P12_4_3_1-5_2_2 | 0.0810339  | 0.0810652  | 0.455711 | 1.54429 |
| Atid_P13_P18_4_4_2-5_5_5 | 0.0810691  | 0.0810693  | 0.21848  | 1.78152 |
| Atid_P12_P12_2_5_2-4_2_3 | 0.081135   | 0.0810664  | 0.380268 | 1.61973 |
| Atid_P9_P11_2_3_1-3_2_3  | 0.0811275  | 0.081149   | 0.394323 | 1.60568 |
| Atid_P16_P16_5_4_4-5_4_4 | 0.081272   | 0.081298   | 0.487806 | 1.51219 |
| Atid_P10_P14_4_1_2-5_4_2 | 0.081389   | 0.0813771  | 0.347842 | 1.65216 |
| Atid_P11_P14_4_1_3-5_4_2 | 0.0814609  | 0.0814683  | 0.272368 | 1.72763 |
| Atid_P12_P18_3_3_3-5_5_5 | 0.081556   | 0.0815548  | 0.304861 | 1.69514 |
| Atid_P11_P16_3_2_3-5_4_4 | 0.0814817  | 0.0816812  | 0.310959 | 1.68904 |
| Atid_P11_P12_2_4_2-4_2_3 | 0.0817376  | 0.0817369  | 0.357115 | 1.64288 |
| Atid_P14_P17_4_4_3-4_5_5 | 0.0817669  | 0.0817398  | 0.239344 | 1.76066 |
| Atid_P10_P17_3_2_2-4_5_5 | 0.0818855  | 0.0818446  | 0.375366 | 1.62463 |
| Atid_P11_P13_4_1_3-3_4_3 | 0.0819006  | 0.0818702  | 0.30274  | 1.69726 |
| Atid_P11_P14_4_3_1-4_5_2 | 0.0817823  | 0.0819389  | 0.186328 | 1.81367 |
| Atid_P12_P15_3_3_3-4_5_3 | 0.081937   | 0.0819802  | 0.336528 | 1.66347 |
| Atid_P10_P13_3_1_3-3_5_2 | 0.0820313  | 0.0820304  | 0.395521 | 1.60448 |
| Atid_P15_P16_5_4_3-3_5_5 | 0.0820595  | 0.0820992  | 0.241401 | 1.7586  |
| Atid_P15_P16_3_5_4-5_4_4 | 0.0822087  | 0.082193   | 0.216639 | 1.78336 |
| Atid_P11_P12_2_3_3-4_3_2 | 0.0822315  | 0.0821758  | 0.29853  | 1.70147 |
| Atid_P11_P14_3_4_1-4_4_3 | 0.0822171  | 0.0822503  | 0.452725 | 1.54727 |
| Atid_P11_P14_4_1_3-4_4_3 | 0.0822774  | 0.0822676  | 0.212657 | 1.78734 |
| Atid_P11_P14_3_3_2-5_2_4 | 0.0823188  | 0.0585117  | 0.190546 | 1.80945 |
| Atid_P10_P11_4_2_1-3_4_1 | 0.0821589  | 0.0823555  | 0.178586 | 1.82141 |
| Atid_P10_P12_3_2_2-5_2_2 | 0.0821515  | 0.0823968  | 0.374618 | 1.62538 |
| Atid_P11_P16_3_3_2-5_3_5 | 0.0824024  | 0.0774931  | 0.288403 | 1.7116  |
| Atid_P10_P14_4_1_2-2_5_4 | 0.0820892  | 0.0824538  | 0.337458 | 1.66254 |
| Atid_P14_P15_5_3_3-3_4_5 | 0.0823968  | 0.0824705  | 0.274552 | 1.72545 |
| Atid_P13_P14_5_3_2-5_4_2 | 0.0824063  | 0.0824738  | 0.493347 | 1.50665 |
| Atid_P8_P13_3_1_1-4_3_3  | 0.0825103  | 0.0825107  | 0.416271 | 1.58373 |

| name                     | $\Delta_l$ | $\Delta_a$ | $c_l$    | $c_a$   |
|--------------------------|------------|------------|----------|---------|
| Atid_P11_P13_3_3_2-4_2_4 | 0.0825439  | 0.0755492  | 0.30903  | 1.69097 |
| Atid_P16_P18_5_3_5-5_5_5 | 0.0825872  | 0.0826201  | 0.258713 | 1.74129 |
| Atid_P12_P12_2_3_4-5_2_2 | 0.0827121  | 0.082712   | 0.362039 | 1.63796 |
| Atid_P9_P10_1_3_2-4_1_2  | 0.0826918  | 0.0827618  | 0.421449 | 1.57855 |
| Atid_P11_P13_4_2_2-3_3_4 | 0.0827584  | 0.0827942  | 0.312347 | 1.68765 |
| Atid_P10_P10_3_3_1-4_1_2 | 0.0828217  | 0.0569795  | 0.30903  | 1.69097 |
| Atid_P11_P13_2_3_3-5_2_3 | 0.0828599  | 0.0829218  | 0.353438 | 1.64656 |
| Atid_P10_P14_2_3_2-5_2_4 | 0.0829586  | 0.0829245  | 0.346517 | 1.65348 |
| Atid_P12_P15_3_2_4-5_4_3 | 0.0827964  | 0.0829934  | 0.352797 | 1.6472  |
| Atid_P9_P14_2_2_2-4_4_3  | 0.0830158  | 0.0829017  | 0.374166 | 1.62583 |
| Atid_P11_P13_3_2_3-4_3_3 | 0.0829683  | 0.0830319  | 0.358855 | 1.64115 |
| Atid_P13_P15_3_5_2-5_3_4 | 0.0830841  | 0.0458649  | 0.165959 | 1.83404 |
| Atid_P12_P14_2_3_4-5_4_2 | 0.0829322  | 0.083125   | 0.260107 | 1.73989 |
| Atid_P12_P14_3_4_2-4_3_4 | 0.083177   | 0.068228   | 0.218776 | 1.78122 |
| Atid_P11_P14_2_3_3-5_3_3 | 0.0833354  | 0.0832974  | 0.311806 | 1.68819 |
| Atid_P11_P14_3_4_1-5_4_2 | 0.0832766  | 0.083379   | 0.341031 | 1.65897 |
| Atid_P15_P15_4_3_5-4_5_3 | 0.083359   | 0.0833839  | 0.263446 | 1.73655 |
| Atid_P9_P13_4_1_1-4_4_2  | 0.0833714  | 0.0834207  | 0.417    | 1.583   |
| Atid_P7_P9_2_1_1-2_2_2   | 0.0834223  | 0.0834092  | 0.508121 | 1.49188 |
| Atid_P11_P15_2_3_3-5_5_2 | 0.0837344  | 0.0836979  | 0.310103 | 1.6899  |
| Atid_P8_P13_1_2_2-5_3_2  | 0.0837207  | 0.0837718  | 0.24924  | 1.75076 |
| Atid_P14_P15_4_2_5-5_4_3 | 0.0838119  | 0.0837907  | 0.308686 | 1.69131 |
| Atid_P12_P14_3_2_4-4_5_2 | 0.0837796  | 0.083826   | 0.294807 | 1.70519 |
| Atid_P15_P15_3_4_5-5_4_3 | 0.0836697  | 0.0839179  | 0.2552   | 1.7448  |
| Atid_P11_P15_4_3_1-5_5_2 | 0.0837925  | 0.0839312  | 0.161822 | 1.83818 |
| Atid_P11_P16_4_2_2-3_5_5 | 0.0840835  | 0.0719745  | 0.269153 | 1.73085 |
| Atid_P12_P16_2_4_3-5_4_4 | 0.0838562  | 0.0840853  | 0.305976 | 1.69402 |
| Atid_P13_P14_4_2_4-5_3_3 | 0.08408    | 0.0841957  | 0.220315 | 1.77969 |
| Atid_P14_P18_4_3_4-5_5_5 | 0.0842393  | 0.0841268  | 0.283263 | 1.71674 |
| Atid_P12_P13_4_1_4-4_4_2 | 0.0840351  | 0.0842691  | 0.220181 | 1.77982 |
| Atid_P12_P15_4_1_4-4_5_3 | 0.0842901  | 0.0842856  | 0.342599 | 1.6574  |
| Atid_P14_P15_3_4_4-5_3_4 | 0.0843687  | 0.0843593  | 0.276199 | 1.7238  |
| Atid_P7_P11_1_2_1-4_3_1  | 0.0843413  | 0.0843761  | 0.4563   | 1.5437  |
| Atid_P9_P15_2_1_3-5_5_2  | 0.0842963  | 0.0844104  | 0.364052 | 1.63595 |
| Atid_P12_P15_4_2_3-3_5_4 | 0.0844121  | 0.084426   | 0.339693 | 1.66031 |
| Atid_P9_P9_3_1_2-3_2_1   | 0.084357   | 0.0845212  | 0.472429 | 1.52757 |
| Atid_P14_P18_4_4_3-5_5_5 | 0.0844488  | 0.0845824  | 0.233431 | 1.76657 |
| Atid_P8_P16_2_2_1-5_5_3  | 0.0846516  | 0.0393607  | 0.177828 | 1.82217 |
| Atid_P12_P17_4_2_3-4_5_5 | 0.0846042  | 0.0847194  | 0.334984 | 1.66502 |

| name                     | $\Delta_l$ | $\Delta_a$ | $c_l$    | $c_a$   |
|--------------------------|------------|------------|----------|---------|
| Atid_P9_P14_2_1_3-5_4_2  | 0.08479    | 0.0847998  | 0.3688   | 1.6312  |
| Atid_P10_P10_1_4_2-4_1_2 | 0.0848784  | 0.0848938  | 0.436774 | 1.56323 |
| Atid_P13_P14_4_3_3-4_3_4 | 0.0848938  | 0.0848799  | 0.33796  | 1.66204 |
| Atid_P11_P16_3_3_2-4_5_4 | 0.0849009  | 0.0697736  | 0.313138 | 1.68686 |
| Atid_P13_P14_3_5_2-5_3_3 | 0.084932   | 0.0355028  | 0.11749  | 1.88251 |
| Atid_P10_P15_3_1_3-4_5_3 | 0.0849686  | 0.0849288  | 0.409421 | 1.59058 |
| Atid_P11_P14_2_4_2-5_2_4 | 0.0849979  | 0.0788758  | 0.288403 | 1.7116  |
| Atid_P8_P10_2_1_2-4_2_1  | 0.0850267  | 0.0850125  | 0.400752 | 1.59925 |
| Atid_P14_P16_5_3_3-4_5_4 | 0.0853426  | 0.085384   | 0.269761 | 1.73024 |
| Atid_P11_P14_4_2_2-2_5_4 | 0.085491   | 0.0854275  | 0.3781   | 1.6219  |
| Atid_P13_P14_3_5_2-4_3_4 | 0.085527   | 0.073657   | 0.251189 | 1.74881 |
| Atid_P14_P15_5_2_4-3_5_4 | 0.0855958  | 0.0856302  | 0.299686 | 1.70031 |
| Atid_P11_P15_2_4_2-5_3_4 | 0.0857956  | 0.085827   | 0.285182 | 1.71482 |
| Atid_P8_P9_2_2_1-2_2_2   | 0.0858119  | 0.0858587  | 0.459616 | 1.54038 |
| Atid_P10_P12_2_2_3-4_3_2 | 0.0859311  | 0.0859905  | 0.354894 | 1.64511 |
| Atid_P17_P17_4_5_5-5_4_5 | 0.0858844  | 0.0861261  | 0.232536 | 1.76746 |
| Atid_P8_P11_2_1_2-3_3_2  | 0.0861279  | 0.0861031  | 0.476239 | 1.52376 |
| Atid_P8_P8_2_1_2-2_2_1   | 0.0859625  | 0.0861696  | 0.474057 | 1.52594 |
| Atid_P13_P17_3_3_4-5_5_4 | 0.0860905  | 0.0863021  | 0.271256 | 1.72874 |
| Atid_P9_P11_3_2_1-2_3_3  | 0.0863368  | 0.0654679  | 0.288403 | 1.7116  |
| Atid_P8_P14_2_1_2-4_4_3  | 0.0862245  | 0.0864015  | 0.351346 | 1.64865 |
| Atid_P12_P16_2_4_3-5_5_3 | 0.086415   | 0.0864899  | 0.270705 | 1.72929 |
| Atid_P13_P14_5_2_3-4_3_4 | 0.0862108  | 0.0865012  | 0.211193 | 1.78881 |
| Atid_P14_P15_4_2_5-4_5_3 | 0.0865118  | 0.0865213  | 0.326467 | 1.67353 |
| Atid_P14_P16_3_5_3-5_3_5 | 0.0865996  | 0.086561   | 0.252785 | 1.74721 |
| Atid_P15_P18_3_5_4-5_5_5 | 0.0864591  | 0.0866204  | 0.261173 | 1.73883 |
| Atid_P9_P11_3_2_1-2_4_2  | 0.0865267  | 0.0866317  | 0.501566 | 1.49843 |
| Atid_P10_P12_1_4_2-5_2_2 | 0.0866336  | 0.0757857  | 0.331131 | 1.66887 |
| Atid_P12_P12_2_4_3-4_3_2 | 0.0864784  | 0.086666   | 0.37053  | 1.62947 |
| Atid_P14_P15_4_3_4-4_4_4 | 0.0865636  | 0.0866732  | 0.272    | 1.728   |
| Atid_P10_P11_2_3_2-3_3_2 | 0.0866411  | 0.0867129  | 0.389303 | 1.6107  |
| Atid_P15_P16_5_2_5-4_5_4 | 0.0864672  | 0.0867179  | 0.286996 | 1.713   |
| Atid_P10_P10_2_4_1-4_2_1 | 0.0867908  | 0.0867974  | 0.358316 | 1.64168 |
| Atid_P7_P7_1_2_1-2_1_1   | 0.0868244  | 0.0868237  | 0.660041 | 1.33996 |
| Atid_P10_P11_2_3_2-4_1_3 | 0.0868202  | 0.0869412  | 0.344836 | 1.65516 |
| Atid_P6_P14_1_1_1-5_3_3  | 0.0869708  | 0.0560296  | 0.177828 | 1.82217 |
| Atid_P9_P9_2_2_2-4_1_1   | 0.0870476  | 0.0870298  | 0.411011 | 1.58899 |
| Atid_P8_P8_1_2_2-3_1_1   | 0.0870461  | 0.0870668  | 0.448982 | 1.55102 |
| Atid_P9_P13_1_3_2-5_3_2  | 0.0869257  | 0.0870706  | 0.335326 | 1.66467 |

| name                     | $\Delta_l$ | $\Delta_a$ | $c_l$    | $c_a$   |
|--------------------------|------------|------------|----------|---------|
| Atid_P14_P17_5_2_4-4_5_5 | 0.0870492  | 0.0870961  | 0.254872 | 1.74513 |
| Atid_P9_P15_2_2_2-5_3_4  | 0.0870757  | 0.0871015  | 0.302999 | 1.697   |
| Atid_P14_P14_4_3_4-4_3_4 | 0.087088   | 0.0871168  | 0.327759 | 1.67224 |
| Atid_P10_P13_2_3_2-4_3_3 | 0.0871411  | 0.0846801  | 0.30903  | 1.69097 |
| Atid_P11_P15_2_4_2-5_4_3 | 0.0870498  | 0.0871898  | 0.312551 | 1.68745 |
| Atid_P14_P15_3_3_5-5_4_3 | 0.0873322  | 0.0872571  | 0.31308  | 1.68692 |
| Atid_P14_P14_3_5_3-5_4_2 | 0.0873431  | 0.0574873  | 0.218776 | 1.78122 |
| Atid_P12_P15_4_3_2-5_4_3 | 0.0873274  | 0.0873506  | 0.499515 | 1.50048 |
| Atid_P8_P9_2_2_1-4_1_1   | 0.0875752  | 0.0876279  | 0.632524 | 1.36748 |
| Atid_P6_P13_1_1_1-5_2_3  | 0.0876778  | 0.0875546  | 0.284334 | 1.71567 |
| Atid_P13_P14_4_3_3-3_4_4 | 0.0876819  | 0.0876947  | 0.283092 | 1.71691 |
| Atid_P12_P14_3_4_2-4_5_2 | 0.0876582  | 0.0878304  | 0.440602 | 1.5594  |
| Atid_P15_P16_5_3_4-4_4_5 | 0.0878332  | 0.087781   | 0.259803 | 1.7402  |
| Atid_P11_P12_3_3_2-4_3_2 | 0.0878773  | 0.0878361  | 0.611014 | 1.38899 |
| Atid_P13_P15_4_3_3-3_5_4 | 0.0879069  | 0.0878317  | 0.295304 | 1.7047  |
| Atid_P14_P15_3_5_3-5_2_5 | 0.0877081  | 0.0879992  | 0.29671  | 1.70329 |
| Atid_P15_P17_4_4_4-5_4_5 | 0.0880131  | 0.0881406  | 0.272777 | 1.72722 |
| Atid_P11_P13_4_3_1-3_5_2 | 0.0881611  | 0.0881254  | 0.334427 | 1.66557 |
| Atid_P13_P16_4_3_3-5_3_5 | 0.0880497  | 0.0881954  | 0.242682 | 1.75732 |
| Atid_P16_P18_4_5_4-5_5_5 | 0.0882094  | 0.0881918  | 0.20909  | 1.79091 |
| Atid_P13_P13_5_3_2-5_3_2 | 0.088227   | 0.0882429  | 0.558025 | 1.44198 |
| Atid_P11_P13_3_3_2-3_4_3 | 0.0882841  | 0.0882617  | 0.357275 | 1.64273 |
| Atid_P8_P11_1_3_1-4_2_2  | 0.0882969  | 0.0882707  | 0.426337 | 1.57366 |
| Atid_P10_P15_2_2_3-5_4_3 | 0.0883564  | 0.0883339  | 0.330065 | 1.66994 |
| Atid_P14_P17_3_5_3-5_4_5 | 0.0883485  | 0.0884091  | 0.216823 | 1.78318 |
| Atid_P11_P13_4_2_2-5_3_2 | 0.0883699  | 0.0884102  | 0.4846   | 1.5154  |
| Atid_P10_P16_3_2_2-4_4_5 | 0.0884197  | 0.0883839  | 0.353477 | 1.64652 |
| Atid_P12_P15_2_3_4-5_5_2 | 0.0884379  | 0.0883476  | 0.276581 | 1.72342 |
| Atid_P8_P10_3_1_1-3_2_2  | 0.088502   | 0.0884397  | 0.474238 | 1.52576 |
| Atid_P14_P14_4_4_3-4_4_3 | 0.0884275  | 0.0885607  | 0.409764 | 1.59024 |
| Atid_P11_P12_3_3_2-3_3_3 | 0.0885716  | 0.0885937  | 0.29877  | 1.70123 |
| Atid_P13_P14_5_2_3-2_5_4 | 0.0886056  | 0.0885869  | 0.31529  | 1.68471 |
| Atid_P11_P13_4_2_2-2_4_4 | 0.0886824  | 0.0887843  | 0.347256 | 1.65274 |
| Atid_P10_P12_2_2_3-5_2_2 | 0.0885711  | 0.0888078  | 0.352459 | 1.64754 |
| Atid_P8_P17_2_1_2-5_5_4  | 0.0887712  | 0.0888318  | 0.297465 | 1.70254 |
| Atid_P11_P11_3_3_2-4_1_3 | 0.0889385  | 0.0889214  | 0.264193 | 1.73581 |
| Atid_P11_P11_2_4_2-4_3_1 | 0.0889999  | 0.0889295  | 0.411491 | 1.58851 |
| Atid_P10_P11_3_2_2-3_2_3 | 0.0888954  | 0.0890382  | 0.336172 | 1.66383 |
| Atid_P13_P16_3_3_4-5_4_4 | 0.0890937  | 0.0889506  | 0.298199 | 1.7018  |

| name                     | $\Delta_l$ | $\Delta_a$ | $c_l$    | $c_a$   |
|--------------------------|------------|------------|----------|---------|
| Atid_P12_P16_4_1_4-5_5_3 | 0.0890972  | 0.089127   | 0.259878 | 1.74012 |
| Atid_P9_P12_2_2_2-4_2_3  | 0.0891033  | 0.0892808  | 0.399851 | 1.60015 |
| Atid_P9_P12_1_4_1-5_2_2  | 0.089154   | 0.0893446  | 0.409258 | 1.59074 |
| Atid_P16_P16_4_5_4-4_5_4 | 0.0893225  | 0.0894036  | 0.25471  | 1.74529 |
| Atid_P14_P17_4_4_3-5_5_4 | 0.0892797  | 0.0894159  | 0.294759 | 1.70524 |
| Atid_P7_P11_2_1_1-4_2_2  | 0.0894225  | 0.0893927  | 0.490988 | 1.50901 |
| Atid_P11_P14_3_1_4-4_5_2 | 0.0894061  | 0.0894332  | 0.385135 | 1.61487 |
| Atid_P10_P15_3_2_2-3_5_4 | 0.0893016  | 0.0894337  | 0.359482 | 1.64052 |
| Atid_P7_P12_1_2_1-4_3_2  | 0.0895198  | 0.0894574  | 0.48458  | 1.51542 |
| Atid_P11_P12_1_4_3-5_2_2 | 0.0897089  | 0.0896969  | 0.345604 | 1.6544  |
| Atid_P13_P14_3_4_3-4_3_4 | 0.0897561  | 0.0897868  | 0.271211 | 1.72879 |
| Atid_P10_P12_1_3_3-5_2_2 | 0.0897036  | 0.0898804  | 0.315093 | 1.68491 |
| Atid_P8_P11_2_2_1-4_1_3  | 0.0899175  | 0.0899167  | 0.375687 | 1.62431 |
| Atid_P14_P14_3_4_4-4_5_2 | 0.0898563  | 0.0899411  | 0.305203 | 1.6948  |
| Atid_P10_P11_3_2_2-2_4_2 | 0.0898662  | 0.0899483  | 0.435692 | 1.56431 |
| Atid_P10_P12_2_3_2-4_4_1 | 0.089765   | 0.0899494  | 0.429119 | 1.57088 |
| Atid_P7_P9_1_2_1-3_2_1   | 0.0899347  | 0.0899745  | 0.468607 | 1.53139 |
| Atid_P14_P14_2_5_4-5_3_3 | 0.0898682  | 0.0899793  | 0.297496 | 1.7025  |
| Atid_P11_P11_3_2_3-3_4_1 | 0.0899878  | 0.0374909  | 0.154882 | 1.84512 |
| Atid_P8_P14_1_2_2-5_4_2  | 0.090131   | 0.0901217  | 0.3809   | 1.6191  |
| Atid_P13_P16_4_2_4-5_4_4 | 0.0899648  | 0.090131   | 0.324024 | 1.67598 |
| Atid_P8_P10_1_3_1-4_2_1  | 0.0901658  | 0.0902057  | 0.502307 | 1.49769 |
| Atid_P11_P13_2_3_3-4_4_2 | 0.0902208  | 0.0901824  | 0.328506 | 1.67149 |
| Atid_P10_P12_3_3_1-3_4_2 | 0.0901298  | 0.0902582  | 0.435182 | 1.56482 |
| Atid_P7_P11_2_1_1-2_4_2  | 0.0902627  | 0.0902416  | 0.479743 | 1.52026 |
| Atid_P13_P16_5_2_3-4_4_5 | 0.0901113  | 0.0902887  | 0.239032 | 1.76097 |
| Atid_P14_P16_3_3_5-5_5_3 | 0.0903778  | 0.0903838  | 0.263527 | 1.73647 |
| Atid_P10_P16_2_2_3-5_5_3 | 0.090417   | 0.0903649  | 0.331131 | 1.66887 |
| Atid_P10_P11_3_3_1-4_3_1 | 0.0903564  | 0.0905258  | 0.218775 | 1.78123 |
| Atid_P11_P11_3_3_2-3_4_1 | 0.0904951  | 0.0905852  | 0.454524 | 1.54548 |
| Atid_P13_P16_4_2_4-4_5_4 | 0.0905546  | 0.0907238  | 0.327641 | 1.67236 |
| Atid_P13_P16_3_4_3-5_3_5 | 0.0906429  | 0.0907634  | 0.261979 | 1.73802 |
| Atid_P13_P14_5_2_3-5_3_3 | 0.0910314  | 0.0911417  | 0.323347 | 1.67665 |
| Atid_P9_P11_1_3_2-4_2_2  | 0.0911417  | 0.0911801  | 0.432842 | 1.56716 |
| Atid_P10_P12_4_2_1-4_4_1 | 0.0911299  | 0.0912347  | 0.219973 | 1.78003 |
| Atid_P7_P11_1_1_2-4_3_1  | 0.0912871  | 0.0912801  | 0.36096  | 1.63904 |
| Atid_P9_P11_4_1_1-1_4_3  | 0.0913414  | 0.0529837  | 0.165959 | 1.83404 |
| Atid_P10_P11_2_2_3-4_2_2 | 0.0914554  | 0.0915964  | 0.410517 | 1.58948 |
| Atid_P10_P14_3_2_2-3_4_4 | 0.0914166  | 0.0916043  | 0.387597 | 1.6124  |

| name                     | $\Delta_l$ | $\Delta_a$ | $c_l$    | $c_a$   |
|--------------------------|------------|------------|----------|---------|
| Atid_P6_P13_1_1_1-4_3_3  | 0.0914317  | 0.0916369  | 0.31166  | 1.68834 |
| Atid_P13_P14_3_3_4-4_4_3 | 0.0914512  | 0.0916946  | 0.294349 | 1.70565 |
| Atid_P10_P13_4_2_1-5_3_2 | 0.0916691  | 0.0917327  | 0.517562 | 1.48244 |
| Atid_P13_P14_3_4_3-4_5_2 | 0.0915101  | 0.0917431  | 0.325329 | 1.67467 |
| Atid_P14_P14_3_5_3-4_4_3 | 0.0918213  | 0.0919337  | 0.306402 | 1.6936  |
| Atid_P16_P17_4_5_4-4_5_5 | 0.0918242  | 0.0919659  | 0.224854 | 1.77515 |
| Atid_P13_P13_2_4_4-5_2_3 | 0.0918954  | 0.0919839  | 0.30903  | 1.69097 |
| Atid_P11_P12_4_1_3-2_5_2 | 0.0920364  | 0.0675005  | 0.30903  | 1.69097 |
| Atid_P11_P13_2_4_2-4_3_3 | 0.09195    | 0.09212    | 0.33269  | 1.66731 |
| Atid_P10_P12_4_1_2-4_3_2 | 0.0922734  | 0.0922725  | 0.318851 | 1.68115 |
| Atid_P14_P14_3_5_3-4_3_4 | 0.0923342  | 0.0922902  | 0.274889 | 1.72511 |
| Atid_P10_P13_2_2_3-4_4_2 | 0.0921561  | 0.0923614  | 0.320373 | 1.67963 |
| Atid_P11_P13_2_2_4-5_3_2 | 0.0924236  | 0.0924531  | 0.372156 | 1.62784 |
| Atid_P13_P15_5_2_3-5_4_3 | 0.0923384  | 0.0924533  | 0.381548 | 1.61845 |
| Atid_P9_P11_2_2_2-3_4_1  | 0.0924188  | 0.0924602  | 0.450135 | 1.54987 |
| Atid_P13_P14_4_4_2-3_5_3 | 0.092373   | 0.0925984  | 0.344131 | 1.65587 |
| Atid_P15_P16_5_2_5-5_4_4 | 0.0925131  | 0.0926024  | 0.232407 | 1.76759 |
| Atid_P7_P13_1_1_2-5_3_2  | 0.0925832  | 0.0926519  | 0.400129 | 1.59987 |
| Atid_P9_P13_1_4_1-5_2_3  | 0.0925974  | 0.0927546  | 0.357753 | 1.64225 |
| Atid_P15_P18_5_2_5-5_5_5 | 0.0926923  | 0.0927805  | 0.279488 | 1.72051 |
| Atid_P9_P10_4_1_1-3_3_1  | 0.0928798  | 0.0928474  | 0.519046 | 1.48095 |
| Atid_P13_P13_4_2_4-4_3_3 | 0.0929227  | 0.0929347  | 0.254136 | 1.74586 |
| Atid_P7_P9_1_2_1-3_1_2   | 0.0929045  | 0.0929376  | 0.456087 | 1.54391 |
| Atid_P13_P14_2_5_3-5_2_4 | 0.0930136  | 0.0929036  | 0.316831 | 1.68317 |
| Atid_P8_P12_2_1_2-3_4_2  | 0.0929013  | 0.0930318  | 0.409223 | 1.59078 |
| Atid_P14_P14_3_4_4-5_2_4 | 0.093141   | 0.0931422  | 0.289479 | 1.71052 |
| Atid_P13_P13_4_4_2-5_3_2 | 0.0931994  | 0.0931549  | 0.44093  | 1.55907 |
| Atid_P13_P17_3_4_3-5_4_5 | 0.0931249  | 0.0932388  | 0.265808 | 1.73419 |
| Atid_P6_P10_1_1_1-3_2_2  | 0.0932543  | 0.093302   | 0.41027  | 1.58973 |
| Atid_P13_P17_3_5_2-5_4_5 | 0.0933171  | 0.0710015  | 0.204174 | 1.79583 |
| Atid_P12_P16_3_3_3-4_5_4 | 0.0932448  | 0.0933208  | 0.26268  | 1.73732 |
| Atid_P11_P15_3_3_2-5_4_3 | 0.0931809  | 0.0933345  | 0.506085 | 1.49391 |
| Atid_P14_P17_5_2_4-5_4_5 | 0.0932943  | 0.0934062  | 0.255291 | 1.74471 |
| Atid_P8_P13_2_2_1-3_4_3  | 0.0934689  | 0.0934589  | 0.481208 | 1.51879 |
| Atid_P14_P18_3_5_3-5_5_5 | 0.0933228  | 0.0934806  | 0.216003 | 1.784   |
| Atid_P12_P14_4_1_4-3_5_3 | 0.0934837  | 0.0935045  | 0.374848 | 1.62515 |
| Atid_P11_P15_4_1_3-3_5_4 | 0.093254   | 0.0935383  | 0.307817 | 1.69218 |
| Atid_P10_P10_2_3_2-3_3_1 | 0.0935566  | 0.0935467  | 0.485497 | 1.5145  |
| Atid_P10_P14_2_2_3-5_3_3 | 0.0935605  | 0.0935357  | 0.360605 | 1.63939 |

| name                     | $\Delta_l$ | $\Delta_a$ | $c_l$    | $c_a$   |
|--------------------------|------------|------------|----------|---------|
| Atid_P11_P13_3_1_4-4_4_2 | 0.093639   | 0.0936669  | 0.397519 | 1.60248 |
| Atid_P9_P13_1_3_2-5_2_3  | 0.0937218  | 0.09371    | 0.364172 | 1.63583 |
| Atid_P11_P14_3_1_4-5_4_2 | 0.0937457  | 0.0937862  | 0.298513 | 1.70149 |
| Atid_P14_P14_2_5_4-5_4_2 | 0.0938319  | 0.0921035  | 0.331147 | 1.66885 |
| Atid_P14_P18_3_4_4-5_5_5 | 0.0938456  | 0.0938876  | 0.314382 | 1.68562 |
| Atid_P13_P15_2_4_4-5_5_2 | 0.0936128  | 0.0939106  | 0.311058 | 1.68894 |
| Atid_P10_P16_4_1_2-3_5_5 | 0.0938329  | 0.0939326  | 0.303561 | 1.69644 |
| Atid_P13_P14_2_4_4-5_3_3 | 0.0940424  | 0.0939518  | 0.277676 | 1.72232 |
| Atid_P14_P14_4_2_5-4_4_3 | 0.0937661  | 0.0940478  | 0.326155 | 1.67384 |
| Atid_P12_P14_4_1_4-5_4_2 | 0.0939887  | 0.0940635  | 0.220448 | 1.77955 |
| Atid_P8_P14_2_2_1-4_5_2  | 0.0939785  | 0.0941002  | 0.523267 | 1.47673 |
| Atid_P13_P16_3_5_2-5_5_3 | 0.0941638  | 0.0942001  | 0.334113 | 1.66589 |
| Atid_P9_P14_1_3_2-5_3_3  | 0.0942094  | 0.0941565  | 0.319858 | 1.68014 |
| Atid_P16_P17_5_3_5-4_5_5 | 0.0941578  | 0.0942343  | 0.259202 | 1.7408  |
| Atid_P13_P13_3_4_3-4_2_4 | 0.094248   | 0.0943239  | 0.332119 | 1.66788 |
| Atid_P14_P17_4_2_5-5_5_4 | 0.0942836  | 0.0944042  | 0.316695 | 1.6833  |
| Atid_P6_P7_1_1_1-2_1_1   | 0.0943677  | 0.0944278  | 0.575451 | 1.42455 |
| Atid_P15_P17_4_4_4-5_5_4 | 0.0944444  | 0.0944152  | 0.324782 | 1.67522 |
| Atid_P13_P13_3_3_4-5_2_3 | 0.0944705  | 0.0945016  | 0.291883 | 1.70812 |
| Atid_P9_P12_2_3_1-4_3_2  | 0.0945396  | 0.0538455  | 0.251189 | 1.74881 |
| Atid_P11_P13_4_1_3-2_5_3 | 0.09454    | 0.0945408  | 0.392884 | 1.60712 |
| Atid_P15_P16_5_3_4-3_5_5 | 0.0943325  | 0.0945588  | 0.27379  | 1.72621 |
| Atid_P13_P14_3_5_2-4_4_3 | 0.0945906  | 0.0946951  | 0.335284 | 1.66472 |
| Atid_P15_P16_4_3_5-4_5_4 | 0.0946487  | 0.0947594  | 0.285483 | 1.71452 |
| Atid_P12_P12_2_4_3-4_2_3 | 0.0949026  | 0.0948976  | 0.370592 | 1.62941 |
| Atid_P12_P12_3_3_3-3_3_3 | 0.0948517  | 0.0949797  | 0.35297  | 1.64703 |
| Atid_P13_P15_3_5_2-4_4_4 | 0.0948839  | 0.0950097  | 0.28362  | 1.71638 |
| Atid_P8_P9_2_1_2-2_3_1   | 0.0951274  | 0.0951662  | 0.471435 | 1.52857 |
| Atid_P11_P12_3_4_1-4_3_2 | 0.095291   | 0.0581067  | 0.218776 | 1.78122 |
| Atid_P10_P11_3_1_3-3_3_2 | 0.0952809  | 0.0953126  | 0.371584 | 1.62842 |
| Atid_P7_P12_1_1_2-4_4_1  | 0.0952558  | 0.0953147  | 0.396195 | 1.6038  |
| Atid_P10_P13_4_1_2-2_4_4 | 0.0953177  | 0.0952592  | 0.367592 | 1.63241 |
| Atid_P8_P11_1_3_1-4_1_3  | 0.0951635  | 0.095387   | 0.431137 | 1.56886 |
| Atid_P8_P9_1_3_1-3_1_2   | 0.0953873  | 0.0953023  | 0.549372 | 1.45063 |
| Atid_P12_P14_4_4_1-4_5_2 | 0.0953874  | 0.0954256  | 0.313254 | 1.68675 |
| Atid_P13_P15_3_3_4-4_5_3 | 0.0950864  | 0.0954461  | 0.248908 | 1.75109 |
| Atid_P12_P15_2_4_3-5_3_4 | 0.0954095  | 0.0954913  | 0.282734 | 1.71727 |
| Atid_P9_P11_1_4_1-4_1_3  | 0.0955379  | 0.0955387  | 0.444433 | 1.55557 |
| Atid_P15_P15_4_4_4-4_4_4 | 0.0954432  | 0.0955415  | 0.336246 | 1.66375 |



| name                     | $\Delta_l$ | $\Delta_a$ | $c_l$    | $c_a$   |
|--------------------------|------------|------------|----------|---------|
| Atid_P15_P15_5_4_3-5_4_3 | 0.0956011  | 0.0956491  | 0.641231 | 1.35877 |
| Atid_P11_P13_3_2_3-3_4_3 | 0.0957776  | 0.0957019  | 0.381553 | 1.61845 |
| Atid_P9_P16_2_1_3-5_5_3  | 0.0957797  | 0.0957155  | 0.39775  | 1.60225 |
| Atid_P14_P15_3_5_3-4_4_4 | 0.0957146  | 0.0957808  | 0.237729 | 1.76227 |
| Atid_P12_P15_3_4_2-4_5_3 | 0.0956915  | 0.0958493  | 0.375295 | 1.6247  |
| Atid_P16_P18_3_5_5-5_5_5 | 0.0959958  | 0.0959814  | 0.220329 | 1.77967 |
| Atid_P8_P10_3_1_1-1_4_2  | 0.0960003  | 0.0959998  | 0.493046 | 1.50695 |
| Atid_P13_P16_4_3_3-3_5_5 | 0.0958018  | 0.0960757  | 0.300349 | 1.69965 |
| Atid_P7_P14_1_1_2-5_4_2  | 0.0960227  | 0.0960771  | 0.393055 | 1.60694 |
| Atid_P13_P16_3_2_5-5_5_3 | 0.0962372  | 0.0961993  | 0.333522 | 1.66648 |
| Atid_P12_P13_3_4_2-3_3_4 | 0.0961825  | 0.0962905  | 0.287227 | 1.71277 |
| Atid_P12_P17_3_2_4-5_5_4 | 0.0963654  | 0.0963877  | 0.332877 | 1.66712 |
| Atid_P14_P15_5_3_3-5_2_5 | 0.0964541  | 0.0964755  | 0.182867 | 1.81713 |
| Atid_P11_P14_2_2_4-5_4_2 | 0.0964431  | 0.0964905  | 0.32024  | 1.67976 |
| Atid_P12_P13_4_3_2-4_3_3 | 0.0964067  | 0.0965199  | 0.50831  | 1.49169 |
| Atid_P13_P15_5_2_3-3_4_5 | 0.0964942  | 0.0965919  | 0.291213 | 1.70879 |
| Atid_P12_P13_4_3_2-2_4_4 | 0.0966871  | 0.096783   | 0.323425 | 1.67657 |
| Atid_P10_P10_2_4_1-3_2_2 | 0.096692   | 0.0968111  | 0.483582 | 1.51642 |
| Atid_P10_P14_4_1_2-3_4_4 | 0.0968728  | 0.0968503  | 0.27831  | 1.72169 |
| Atid_P8_P9_1_2_2-3_2_1   | 0.0966754  | 0.0969014  | 0.467735 | 1.53226 |
| Atid_P10_P12_3_1_3-4_3_2 | 0.0967961  | 0.0969315  | 0.262271 | 1.73773 |
| Atid_P10_P10_1_4_2-4_2_1 | 0.0970755  | 0.0970203  | 0.477286 | 1.52271 |
| Atid_P9_P18_3_1_2-5_5_5  | 0.0970947  | 0.0971086  | 0.268956 | 1.73104 |
| Atid_P15_P17_4_4_4-4_5_5 | 0.0971628  | 0.0971492  | 0.235256 | 1.76474 |
| Atid_P10_P15_3_1_3-5_4_3 | 0.0972541  | 0.0972138  | 0.295984 | 1.70402 |
| Atid_P13_P14_5_3_2-2_5_4 | 0.0973436  | 0.0621633  | 0.251189 | 1.74881 |
| Atid_P8_P14_2_1_2-3_5_3  | 0.09374    | 0.0973976  | 0.410088 | 1.58991 |
| Atid_P13_P15_3_4_3-5_2_5 | 0.0972046  | 0.0974916  | 0.298285 | 1.70171 |
| Atid_P12_P14_4_3_2-2_5_4 | 0.0975053  | 0.0975165  | 0.384831 | 1.61517 |
| Atid_P13_P15_4_2_4-4_4_4 | 0.0974888  | 0.0975251  | 0.32687  | 1.67313 |
| Atid_P11_P12_4_1_3-4_3_2 | 0.0975598  | 0.0975776  | 0.276261 | 1.72374 |
| Atid_P11_P12_4_2_2-2_3_4 | 0.0974594  | 0.0975867  | 0.378091 | 1.62191 |
| Atid_P13_P15_2_5_3-5_3_4 | 0.0975049  | 0.0976176  | 0.284577 | 1.71542 |
| Atid_P6_P11_1_1_1-3_3_2  | 0.0976668  | 0.0976818  | 0.577054 | 1.42295 |
| Atid_P12_P14_2_4_3-5_2_4 | 0.0977185  | 0.0976474  | 0.317521 | 1.68248 |
| Atid_P10_P14_2_2_3-4_5_2 | 0.0977333  | 0.0977092  | 0.310318 | 1.68968 |
| Atid_P10_P11_4_1_2-2_3_3 | 0.0976371  | 0.0977503  | 0.348387 | 1.65161 |
| Atid_P12_P13_3_3_3-3_5_2 | 0.0976769  | 0.097754   | 0.317769 | 1.68223 |
| Atid_P15_P16_3_5_4-5_3_5 | 0.0974586  | 0.0977603  | 0.264176 | 1.73582 |

| name                     | $\Delta_l$ | $\Delta_a$ | $c_l$    | $c_a$   |
|--------------------------|------------|------------|----------|---------|
| Atid_P13_P15_3_3_4-5_3_4 | 0.0976405  | 0.097778   | 0.333079 | 1.66692 |
| Atid_P12_P15_3_2_4-4_5_3 | 0.0978452  | 0.0978282  | 0.32469  | 1.67531 |
| Atid_P10_P14_3_1_3-3_5_3 | 0.0976488  | 0.0979474  | 0.446206 | 1.55379 |
| Atid_P7_P11_1_2_1-4_1_3  | 0.0979488  | 0.0979228  | 0.467834 | 1.53217 |
| Atid_P10_P11_4_1_2-4_3_1 | 0.0979116  | 0.0979546  | 0.47564  | 1.52436 |
| Atid_P13_P16_3_5_2-5_3_5 | 0.0980192  | 0.0644094  | 0.165959 | 1.83404 |
| Atid_P11_P12_3_3_2-3_2_4 | 0.0979856  | 0.0980354  | 0.382135 | 1.61787 |
| Atid_P12_P14_3_2_4-4_4_3 | 0.0981229  | 0.0981233  | 0.36776  | 1.63224 |
| Atid_P15_P18_4_3_5-5_5_5 | 0.098176   | 0.0982008  | 0.279341 | 1.72066 |
| Atid_P7_P15_1_1_2-5_5_2  | 0.0982113  | 0.0983616  | 0.40079  | 1.59921 |
| Atid_P14_P15_4_4_3-3_5_4 | 0.0983026  | 0.0983872  | 0.252973 | 1.74703 |
| Atid_P8_P12_2_2_1-3_4_2  | 0.0984272  | 0.0984229  | 0.568374 | 1.43163 |
| Atid_P10_P17_4_1_2-4_5_5 | 0.0984281  | 0.0985294  | 0.24286  | 1.75714 |
| Atid_P11_P15_3_2_3-4_4_4 | 0.0985395  | 0.098731   | 0.365547 | 1.63445 |
| Atid_P8_P13_1_3_1-5_3_2  | 0.0986995  | 0.098737   | 0.382791 | 1.61721 |
| Atid_P15_P17_3_4_5-5_5_4 | 0.0986122  | 0.0988087  | 0.221598 | 1.7784  |
| Atid_P14_P15_4_3_4-3_5_4 | 0.0986597  | 0.0988586  | 0.290113 | 1.70989 |
| Atid_P10_P13_2_4_1-4_3_3 | 0.0987539  | 0.09888    | 0.407869 | 1.59213 |
| Atid_P11_P15_2_2_4-5_5_2 | 0.098966   | 0.0989651  | 0.284326 | 1.71567 |
| Atid_P16_P17_3_5_5-5_4_5 | 0.0987626  | 0.0989775  | 0.235467 | 1.76453 |
| Atid_P11_P15_4_1_3-5_4_3 | 0.098675   | 0.0990304  | 0.381495 | 1.61851 |
| Atid_P13_P15_4_3_3-4_3_5 | 0.0988487  | 0.0990335  | 0.300103 | 1.6999  |
| Atid_P11_P18_3_2_3-5_5_5 | 0.0993567  | 0.0918665  | 0.307888 | 1.69211 |
| Atid_P6_P14_1_1_1-4_4_3  | 0.0994266  | 0.099408   | 0.43304  | 1.56696 |
| Atid_P13_P15_5_3_2-4_5_3 | 0.0994879  | 0.0994878  | 0.5122   | 1.4878  |
| Atid_P10_P14_3_1_3-4_4_3 | 0.0997311  | 0.0996865  | 0.405037 | 1.59496 |
| Atid_P11_P15_2_3_3-5_3_4 | 0.099802   | 0.0998894  | 0.297634 | 1.70237 |
| Atid_P11_P12_4_2_2-3_2_4 | 0.0998377  | 0.0999628  | 0.314929 | 1.68507 |
| Atid_P9_P12_3_1_2-3_3_3  | 0.0998852  | 0.0999789  | 0.366209 | 1.63379 |

## 8 Regular DArD P-cages

| name                       | name                       |
|----------------------------|----------------------------|
| DArd_P6_P8_1_1_1-1_1_1_1   | DArd_P6_P12_1_1_1-2_2_2_2  |
| DArd_P6_P16_1_1_1-3_3_3_3  | DArd_P6_P20_1_1_1-4_4_4_4  |
| DArd_P9_P8_2_2_2-1_1_1_1   | DArd_P9_P12_2_2_2-2_2_2_2  |
| DArd_P9_P16_2_2_2-3_3_3_3  | DArd_P9_P20_2_2_2-4_4_4_4  |
| DArd_P12_P8_3_3_3-1_1_1_1  | DArd_P12_P12_3_3_3-2_2_2_2 |
| DArd_P12_P16_3_3_3-3_3_3_3 | DArd_P12_P20_3_3_3-4_4_4_4 |
| DArd_P15_P12_4_4_4-2_2_2_2 | DArd_P15_P16_4_4_4-3_3_3_3 |
| DArd_P15_P20_4_4_4-4_4_4_4 | DArd_P18_P12_5_5_5-2_2_2_2 |
| DArd_P18_P16_5_5_5-3_3_3_3 | DArd_P18_P20_5_5_5-4_4_4_4 |

## 9 Regular DArt P-cages

| name                         | name                         |
|------------------------------|------------------------------|
| DArt_P6_P10_1_1_1-1_1_1_1_1  | DArt_P6_P15_1_1_1-2_2_2_2_2  |
| DArt_P6_P20_1_1_1-3_3_3_3_3  | DArt_P9_P10_2_2_2-1_1_1_1_1  |
| DArt_P9_P15_2_2_2-2_2_2_2_2  | DArt_P9_P20_2_2_2-3_3_3_3_3  |
| DArt_P12_P10_3_3_3-1_1_1_1_1 | DArt_P12_P15_3_3_3-2_2_2_2_2 |
| DArt_P12_P20_3_3_3-3_3_3_3_3 | DArt_P15_P15_4_4_4-2_2_2_2_2 |
| DArt_P15_P20_4_4_4-3_3_3_3_3 | DArt_P18_P15_5_5_5-2_2_2_2_2 |
| DArt_P18_P20_5_5_5-3_3_3_3_3 |                              |
